# Supplementary material
Source: publisher figshare collection journal article supplement (https://acs.figshare.com/ndownloader/files/3856141)
Supplement: Supplementary file 1 [file 3856141]

## Sheet: S3_a
		All peptides identified and quantified after high confidence peptide filtering (1 Day, 0.05 Gy)
Protein Group Accessions	Sequence	Modifications	MH+ [Da]	Heavy/Light	Heavy/Light Count	Heavy/Light Variability [%]	q-Value	PEP	IonScore A2	Exp Value A2	IonScore B2	Exp Value B2	IonScore C2	Exp Value C2
ENSP00P02769	ALKAWSVAR	K3(ICPL)	1106.61	0.391383	3;1;2	23.4166	0	4.341e-06	55.51	2.76972e-05	45.65	0.000268186	39.58	0.00115111
ENSP00P02769	ALKAWSVAR	K3(ICPL:13C(6))	1112.63	0.413365	1;1;3	14.3988	0	1.20264e-06	46.15	0.000222035	42.98	0.000460703	56.94	1.85106e-05
ENSP00P02769	HPEYAVSVLLR		1283.71				0	0.000676967	28.01	0.0169984	22.83	0.0531619	26.81	0.0210534
ENSP00P02769	CASIQKFGER	C1(Carbamidomethyl); K6(ICPL)	1300.61	0.657517	4;3;3	28.1922	0	7.40355e-06	49.17	8.8979e-05	50.55	6.56381e-05	45.82	0.000195055
ENSP00P02769	CASIQKFGER	C1(Carbamidomethyl); K6(ICPL:13C(6))	1306.63	0.684924	1;2;1	12.8634	0	2.54815e-05	42.3	0.000659505	48.13	0.000172273	44.76	0.000372627
ENSP00P02769	RHPEYAVSVLLR		1439.81				0	1.10382e-08	67.59	1.76793e-06	74.29	3.77978e-07	73.89	5.00191e-07
ENSP00P02769	KVPQVSTPTLVEVSR		1639.94				0	1.7768e-05	28.94	0.01002	79.4	9.18523e-08	19.43	0.09122
ENSP00P02769	MPCTEDYLSLILNR	C3(Carbamidomethyl)	1724.84				0	3.54912e-12	103.74	5.74829e-10	106.71	3.16757e-10	107.73	2.29371e-10
ENSP00P02769	MPCTEDYLSLILNR	M1(Oxidation); C3(Carbamidomethyl)	1740.83				0	9.0436e-11	102.37	9.15497e-10	87.28	2.95568e-08	84.45	5.41972e-08
ENSP00P02769	KVPQVSTPTLVEVSR	K1(ICPL)	1744.96	0.641131	3;3;4	23.7418	0	5.46798e-10	67.62	2.59472e-06	64.94	4.76131e-06	71.29	1.19255e-06
ENSP00P02769	KVPQVSTPTLVEVSR	K1(ICPL:13C(6))	1750.98	0.62083	3;3;2	12.6603	0	1.29986e-07	54.19	4.66806e-05	66.89	2.50689e-06	48.58	0.000169878
ENSP00P02769	ETYGDMADCCEKQEPER	C9(Carbamidomethyl); C10(Carbamidomethyl); K12(ICPL)	2222.84	0.523972	2;2;2	15.5291	0	3.39681e-08	63.2	4.77496e-07	67.61	1.7297e-07	70.92	8.07179e-08
ENSP00P02769	ETYGDMADCCEKQEPER	C9(Carbamidomethyl); C10(Carbamidomethyl); K12(ICPL:13C(6))	2228.86	0.625548	3;3;4	13.334	0	6.2993e-09	72.27	5.91521e-08	62.95	5.0579e-07	75.9	2.56431e-08
ENSP00P02769	CCTKPESERMPCTEDYLSLILNR	C1(Carbamidomethyl); C2(Carbamidomethyl); K4(ICPL:13C(6)); M10(Oxidation); C12(Carbamidomethyl)	2999.34	2.15338	1;-;1	77.819	0	0.000616077	29.43	0.0116305			18.09	0.163001
ENSP00P02769	LCVLHEKTPVSEKVTKCCTESLVNR	C2(Carbamidomethyl); K7(ICPL); K13(ICPL); K16(ICPL); C17(Carbamidomethyl); C18(Carbamidomethyl)	3302.57	0.654891	6;4;3	11.8783	0	1.58618e-10	58.6	4.16186e-05	64.76	9.79191e-06	63.41	1.33619e-05
ENSP00P02769	LCVLHEKTPVSEKVTKCCTESLVNR	C2(Carbamidomethyl); K7(ICPL:13C(6)); K13(ICPL:13C(6)); K16(ICPL:13C(6)); C17(Carbamidomethyl); C18(Carbamidomethyl)	3320.64	0.627546	3;5;5	19.554	0	1.98815e-11	58.9	5.52015e-05	57.51	7.51369e-05	83.02	2.09282e-07
ENSP00P02769	ALKAWSVAR		1001.59				0.000213	0.00424829			26.07	0.0210097
ENSP00P01012	KIKVYLPR	K3(ICPL:13C(6))	1127.7				0.000262	0.00443175	28.67	0.00230913
ENSP00P01012	KIKVYLPR	K1(ICPL); K3(ICPL)	1226.7	0.132395	5;3;4	15.8501	0	0.000169415	38.47	0.00111653	47.28	0.000146849	38.54	0.00109868
ENSP00P01012	KIKVYLPR	K1(ICPL:13C(6)); K3(ICPL:13C(6))	1238.74	0.135047	1;3;2	12.4578	0	4.13234e-05	46.2	6.59679e-05	39.04	0.00034303	32.01	0.00173114
ENSP00P01012	GGLEPINFQTAADQAR		1687.84				0	3.64285e-09	99.94	2.26102e-09	92.95	1.14326e-08	82.19	1.31359e-07
ENSP00P01012	ELINSWVESQTNGIIR		1858.97				0	4.33208e-11	91.49	1.85909e-08	91.57	1.84258e-08	97.83	4.05448e-09
ENSP00P01012	EVVGSAEAGVDAASVSEEFR		2008.95				0	9.58472e-14	127.63	3.37401e-12	149.63	2.21053e-14	129.7	2.17518e-12
ENSP00P01012	YPILPEYLQCVKELYR	C10(Carbamidomethyl); K12(ICPL)	2189.11	0.153164	4;4;5	19.0564	0	3.05425e-08	77.06	5.71671e-07	51.72	0.000194154	55.52	8.30408e-05
ENSP00P01012	YPILPEYLQCVKELYR	C10(Carbamidomethyl); K12(ICPL:13C(6))	2195.13	0.126955	-;1;-		0	1.06404e-05	61.19	2.02247e-05	59.15	3.23505e-05
ENSP00P01012	DILNQITKPNDVYSFSLASR	K8(ICPL)	2386.2	0.140998	5;4;3	17.2994	0	1.61078e-09	70.89	2.38301e-06	87.6	5.32636e-08	66.46	6.92517e-06
ENSP00P01012	VTEQESKPVQMMYQIGLFR	K7(ICPL)	2389.17	0.139671	4;4;5	19.6998	0	3.83564e-10	74.67	8.42746e-07	70.11	2.42285e-06	66.51	5.5951e-06
ENSP00P01012	DILNQITKPNDVYSFSLASR	K8(ICPL:13C(6))	2392.22	0.144625	1;2;2	18.206	0	2.96774e-10	75.03	8.38516e-07	72.79	1.37027e-06	86.43	5.96076e-08
ENSP00P01012	VTEQESKPVQMMYQIGLFR	K7(ICPL:13C(6))	2395.19	0.105973	-;-;1		0	4.87633e-09	49.45	0.000345611	66.89	6.11887e-06	81.43	2.12597e-07
ENSP00P01012	VTEQESKPVQMMYQIGLFR	K7(ICPL); M11(Oxidation)	2405.16	0.128613	6;4;4	26.3227	0	7.02115e-08	71.84	1.68896e-06	98.08	4.02217e-09	66.11	5.81653e-06
ENSP00P01012	VTEQESKPVQMMYQIGLFR	K7(ICPL); M11(Oxidation); M12(Oxidation)	2421.16	0.1439	1;1;1	20.3025	0	2.54572e-08	30.16	0.0233247	19.92	0.250573	37.97	0.00387799
ENSP00P01012	ADHPFLFCIKHIATNAVLFFGR	C8(Carbamidomethyl); K10(ICPL)	2679.37	0.14595	4;2;2	22.2141	0	3.14301e-10	32.47	0.0188275	22.64	0.188126	39.64	0.00357977
ENSP00P01012	FDKLPGFGDSIEAQCGTSVNVHSSLR	K3(ICPL); C15(Carbamidomethyl)	2926.38	0.0895533	1;1;-	10.5505	0	3.74704e-08	24.31	0.0828471	12.09	1.37509	58.63	3.13246e-05
ENSP00P01012	LYAEERYPILPEYLQCVKELYR	C16(Carbamidomethyl); K18(ICPL)	2950.48	0.147708	5;5;5	21.4935	0	8.39341e-10	48.7	0.000497093	57.18	7.05403e-05	55.75	9.79147e-05
ENSP00P01012	LYAEERYPILPEYLQCVKELYR	C16(Carbamidomethyl); K18(ICPL:13C(6))	2956.5				0	5.66753e-08	43.33	0.00152129
ENSP00P01012	KIKVYLPR	K1(ICPL)	1121.68				0.000415	0.0118382					30.11	0.00336371
ENSP00P00921	LVQFHFHWGSSDDQGSEHTVDR		2584.16				0	7.60692e-13	83.87	4.38918e-08	70.21	1.0052e-06	85.68	2.90676e-08
ENSP00P00921	TLNFNAEGEPELLMLANWRPAQPLKNR	K25(ICPL:13C(6))	3233.66	1.21403	6;5;6	19.7911	0	5.37627e-09	82.45	2.14173e-07	80.35	3.49193e-07	75.07	1.16845e-06
ENSP00P00921	TLNFNAEGEPELLMLANWRPAQPLKNR	M14(Oxidation); K25(ICPL)	3243.63				0.000185	0.00175772	16.76	0.831854
ENSP00P00921	TLNFNAEGEPELLMLANWRPAQPLKNR	M14(Oxidation); K25(ICPL:13C(6))	3249.66	1.49914	3;3;2	17.5565	0	8.21824e-08	53.06	0.00017548	83.91	1.44287e-07	87.84	5.7553e-08
ENSP00P00921	QSPVDIDTKAVVQDPALKPLALVYGEATSR	K9(ICPL:13C(6))	3292.75				0	5.74159e-06	33.81	0.00964913
ENSP00P00921	MSHHWGYGKHNGPEHWHKDFPIANGER	M1(Oxidation); K18(ICPL)	3345.49				0	1.51815e-07	37.51	0.00229758	31.4	0.00829479	43.71	0.000510718
ENSP00P00921	QSPVDIDTKAVVQDPALKPLALVYGEATSR	K9(ICPL); K18(ICPL)	3391.75	1.23224	1;-;3	21.6677	0	2.77102e-10	74.63	1.28615e-06	85.03	1.19182e-07	82.12	2.31081e-07
ENSP00P00921	QSPVDIDTKAVVQDPALKPLALVYGEATSR	K9(ICPL:13C(6)); K18(ICPL:13C(6))	3403.79	1.17884	3;4;2	21.6096	0	2.93739e-14	82.17	1.58358e-07	108.95	3.31111e-10	67.01	5.1857e-06
ENSP00P00921	MSHHWGYGKHNGPEHWHKDFPIANGER	M1(Oxidation); K9(ICPL); K18(ICPL)	3450.51				0	2.21843e-07	18.47	0.120187	19.41	0.0853407	19.87	0.0829461
ENSP00P00921	QSPVDIDTKAVVQDPALKPLALVYGEATSRR	K9(ICPL); K18(ICPL)	3547.84				0	8.45492e-08	75.54	9.53654e-07
ENSP00P00921	QSPVDIDTKAVVQDPALKPLALVYGEATSRR	K9(ICPL:13C(6)); K18(ICPL:13C(6))	3559.89	1.30484	-;-;1		0	1.0546e-08	78.9	3.84542e-07			43.73	0.00122645
ENSP00P00921	MVNNGHSFNVEYDDSQDKAVLKDGPLTGTYR	K18(ICPL:13C(6))	3581.67				0	6.71015e-08	51.8	0.000191931
ENSP00P00921	MVNNGHSFNVEYDDSQDKAVLKDGPLTGTYR	K18(ICPL); K22(ICPL)	3680.67	1.26207	6;2;4	16.763	0	2.24588e-09	63.1	8.05686e-06	51.72	0.000123155	66.8	3.80252e-06
ENSP00P00921	MVNNGHSFNVEYDDSQDKAVLKDGPLTGTYR	K18(ICPL:13C(6)); K22(ICPL:13C(6))	3692.71	1.25999	3;5;4	15.0442	0	3.49743e-10	60.6	2.42128e-05	55	8.87019e-05	58.01	4.51446e-05
ENSP00P00921	MVNNGHSFNVEYDDSQDKAVLKDGPLTGTYR	M1(Oxidation); K18(ICPL); K22(ICPL)	3696.67	1.14711	-;-;1		0	1.28752e-09	27.9	0.0213268	17.04	0.231305	61.1	9.66428e-06
ENSP00P00921	MVNNGHSFNVEYDDSQDKAVLKDGPLTGTYR	M1(Oxidation); K18(ICPL:13C(6)); K22(ICPL:13C(6))	3708.71	1.30655	1;3;2	7.85964	0	1.8509e-07	46.43	0.000607451	63.28	1.24522e-05	50.31	0.000244881
ENSP00P00921	RMVNNGHSFNVEYDDSQDKAVLKDGPLTGTYR	K23(ICPL:13C(6))	3737.77				0	5.96685e-05	10.74	2.90107
ENSP00P00921	RMVNNGHSFNVEYDDSQDKAVLKDGPLTGTYR	K19(ICPL); K23(ICPL)	3836.77	1.35709	3;-;2	12.1348	0	2.30577e-10	51.95	0.000138184	45.4	0.000712356	84.77	8.18562e-08
ENSP00P00921	RMVNNGHSFNVEYDDSQDKAVLKDGPLTGTYR	K19(ICPL:13C(6)); K23(ICPL:13C(6))	3848.81	1.55488	2;4;2	10.6128	0	2.60545e-13	74.24	1.19603e-06	76.44	6.49181e-07	98.95	3.68042e-09
ENSP00P00921	RMVNNGHSFNVEYDDSQDKAVLKDGPLTGTYR	M2(Oxidation); K19(ICPL); K23(ICPL)	3852.77	1.13994	-;1;-		0	3.59889e-06	35.72	0.00503684	44	0.000808158	26.35	0.0485494
ENSP00P00921	RMVNNGHSFNVEYDDSQDKAVLKDGPLTGTYR	M2(Oxidation); K19(ICPL:13C(6)); K23(ICPL:13C(6))	3864.79	1.13936	-;-;1		0	6.6366e-07	43.41	0.00137723	35.7	0.00750938	57.04	5.26862e-05
ENSP00P00921	TLNFNAEGEPELLMLANWRPAQPLKNR	K25(ICPL)	3227.64	1.18532	-;1;-		0	0.000673296			40.04	0.00402278
ENSP00P00921	SHHWGYGKHNGPEHWHKDFPIANGER	N-Term(ICPL); K8(ICPL); K17(ICPL:13C(6))	3414.55				0.001742	0.044445					12.61	1.02254
ENSMUSP00000137585	VALVQYSDR		1050.56				0	3.48778e-05	24.49	0.041431	32.58	0.00516192	37.61	0.00162111
ENSMUSP00000137585	NAGPEFQYIR		1194.59				9.3e-05	0.00110479	31.14	0.00799896	39.93	0.00118393	25.12	0.033068
ENSMUSP00000137585	VAIAQFSDDVR		1220.63				0	8.34337e-06	27.12	0.0325098			54.2	6.36817e-05
ENSMUSP00000137585	TDLQTITNDPR		1273.64				9.8e-05	0.00273334					19.06	0.232189
ENSMUSP00000137585	ELGTIQQVISER		1372.74				0	0.000200486	42.5	0.000818207	35.95	0.00369712	32.2	0.00894801
ENSMUSP00000137585	SSDAVAGPASSLKQR	K13(ICPL:13C(6))	1584.81				0	0.000156247	34.49	0.00805505	23.56	0.0978032	54.21	8.61045e-05
ENSMUSP00000137585	VAVVTYNNEVTTEIR		1707.89				0	2.50329e-08	50.59	0.000194673	53.11	0.000108969	84.93	7.11826e-08
ENSMUSP00000137585	IEDGVPQHLVLFLGGKSQDDVAR	K16(ICPL)	2598.34	0.793241	1;-;1	25.1381	0	5.46608e-06	10.8	2.36637			23.54	0.129236
ENSMUSP00000137585	SQRPYVLTADTLKLYQNKFR	K13(ICPL); K18(ICPL)	2651.37	0.606451	1;1;1	26.1643	0	4.23611e-07	26.03	0.0744637	11.07	2.34098	32.18	0.0179181
ENSMUSP00000137585	AAEGVPKLLVLITGGKSLDEVSQPAQELKR	K7(ICPL:13C(6)); K16(ICPL:13C(6)); K29(ICPL:13C(6))	3479.91				0	1.94126e-07	14.71	0.600065			30.04	0.0165964
ENSMUSP00000137585	ALEFVAR		805.456				0.000919	0.0139565			22.02	0.0439641
ENSMUSP00000137585	VGIEHLLR		936.561				0	9.26818e-05			53.53	1.17556e-05
ENSMUSP00000137585	DSFQEVLR		993.499				0.000213	0.00409214			33.59	0.00522839
ENSMUSP00000137585	LMHLEFGR		1002.52				0	7.93723e-05			29.49	0.019793	29.97	0.0174199
ENSMUSP00000137585	LNIGPSKVR	K7(ICPL)	1088.62	0.778967	-;1;1		0.002876	0.0510395			19.13	0.0898023	13.89	0.300115
ENSMUSP00000137585	LNIGPSKVR	K7(ICPL:13C(6))	1094.64				0.005688	0.111361			11.63	1.22298
ENSMUSP00000137585	QAGAQALILVGLER		1438.84				0	1.62423e-05			49.96	5.60135e-05
ENSMUSP00000137585	IEDNVQQFLVLLVAGR		1814.02				0	8.50283e-10			80.71	8.36443e-08	79.83	1.13351e-07
ENSMUSP00000137585	LTLLGGPTPNTGAALEFVLR		2040.15				0	1.6853e-08			37.19	0.00168067	46.29	0.000238488
ENSMUSP00000137585	IEDGVPQHLVLFLGGKSQDDVAR	K16(ICPL:13C(6))	2604.35	0.800679	-;1;-		0	0.000224162			16.71	0.664443	14.84	0.953117
ENSMUSP00000137585	LEQKLLTPITTLTSQQIHQILASTR	K4(ICPL:13C(6))	2944.65	0.959204	-;1;-		0	0.000177298			25.8	0.0168337
ENSMUSP00000137585	YPPSVVESDAADIVFLIDSSDAVKPDGIAHIR	K24(ICPL:13C(6))	3507.77	0.747297	-;1;-		0	6.62136e-10			41.74	0.00340636	16.59	1.09092
ENSMUSP00000137585	LRPKGGSQVYIGNALEYVLKNIFQRPLGSR	K4(ICPL:13C(6)); K20(ICPL:13C(6))	3595.96	0.88308	-;1;-		0	1.38524e-06			48.76	0.000177616
ENSMUSP00000137585	GFMYDRPLR		1154.58				0.003434	0.0857314					10.63	0.808745
ENSMUSP00000137585	DQNVFVSQKGLESKVDIILNR	K9(ICPL); K14(ICPL)	2612.36	0.54204	-;-;1		3.6e-05	0.000574185					30.6	0.0287418
ENSMUSP00000137585	YPPSVVESDAADIVFLIDSSDAVKPDGIAHIR	K24(ICPL)	3501.75	0.644202	-;-;1		0	2.55053e-05					27.8	0.072275
ENSMUSP00000137538	LLCSISQER	C3(Carbamidomethyl)	1105.57				0	1.39949e-05	43.01	0.000917563	35.1	0.00531531	53.92	6.99502e-05
ENSMUSP00000137459	NDFQLIGIQDGYLSLLQDSGEVR		2580.29				0	4.47551e-14	107.5	6.304e-10	107.5	6.45515e-10	126.42	8.14082e-12
ENSMUSP00000137459	NDFQLIGIQDGYLSLLQDSGEVREDLR		3093.55				6.7e-05	0.000796074	27.7	0.0726848	16.97	0.845828	21.36	0.303423
ENSMUSP00000137435	QELSHALYQHDAACR	C14(Carbamidomethyl)	1798.83				0	0.000121637			23.39	0.0629945
ENSMUSP00000137435	IWSVPNTSCVQVVR	C9(Carbamidomethyl)	1644.85				0	8.89935e-05			37.72	0.00310196	20.88	0.146985
ENSMUSP00000137309	LVTTGVLKQTKGVGASGSFR	K8(ICPL); K11(ICPL)	2216.18	0.944719	4;2;3	12.0157	0	1.65444e-11	33.23	0.0104098	88.4	3.25224e-08	87.31	4.18006e-08
ENSMUSP00000137309	LVTTGVLKQTKGVGASGSFR	K8(ICPL:13C(6)); K11(ICPL:13C(6))	2228.22	1.02147	-;1;1		0	1.70981e-14	13.44	0.658966	125.39	4.58173e-12	107.26	2.80958e-10
ENSMUSP00000137309	AKASKKSTDHPKYSDMIVAAIQAEKNR	K2(ICPL); K5(ICPL); K6(ICPL); K12(ICPL); K25(ICPL)	3512.68	0.896181	3;4;2	23.5786	0	6.76745e-10	31.13	0.0240907	52.94	0.000152702	49.45	0.000341071
ENSMUSP00000137309	AKASKKSTDHPKYSDMIVAAIQAEKNR	K2(ICPL:13C(6)); K5(ICPL:13C(6)); K6(ICPL:13C(6)); K12(ICPL:13C(6)); K25(ICPL:13C(6))	3542.8	0.767143	1;-;1	22.5525	0	1.36522e-07	39.16	0.00495669	48.07	0.000618363	51.35	0.000309252
ENSMUSP00000137309	AKASKKSTDHPKYSDMIVAAIQAEKNR	K2(ICPL); K5(ICPL); K6(ICPL); K12(ICPL); M16(Oxidation); K25(ICPL)	3528.7				0	0.000163191			18.4	0.571671	11.78	2.06092
ENSMUSP00000137120	KYAVLYQPLFDKR	K1(ICPL); K12(ICPL)	1850.96	0.993063	-;-;1		0	7.78254e-06					23.71	0.0804381
ENSMUSP00000137120	KYAVLYQPLFDKR	K1(ICPL:13C(6)); K12(ICPL:13C(6))	1863				0.004605	0.117007					11.25	1.21108
ENSMUSP00000136535	LHALVVGPGLGRDDLLLNNVR		2241.28				0.000262	0.00489019	21.6	0.0345915
ENSMUSP00000136535	GILESTKAR	K7(ICPL:13C(6))	1085.6				0.00166	0.0440958					15.86	0.382641
ENSMUSP00000136535	LHALVVGPGLGR		1188.72				0	0.000432759			29.93	0.00157519
ENSMUSP00000136535	IGIVGGCQEYTGAPYFAGISALKVGADLTHVFCAR	C7(Carbamidomethyl); K23(ICPL:13C(6)); C33(Carbamidomethyl)	3809.91				0.000708	0.0106461			14.28	2.13872
ENSMUSP00000136527	IMLKNVEDFTGPR	K4(ICPL:13C(6))	1630.83	1.25245	-;-;1		0	7.13579e-06					35.15	0.00707214
ENSMUSP00000136029	GAGLLQRPGTEPGHSAGSSGSR		2079.03				0	1.61368e-08	27.28	0.0468606	34.65	0.00868916	44.57	0.000911256
ENSMUSP00000135466	THPELLVAHAYTR		1507.8				0	1.02887e-06	26.99	0.0325977	46.02	0.000420058	38.17	0.00249183
ENSMUSP00000135466	NKQNPVYAPLYFPEELHR	K2(ICPL:13C(6))	2326.17	1.44171	-;1;-		0	7.15734e-07			28.15	0.0465451
ENSMUSP00000135427;ENSMUSP00000073561;ENSMUSP00000097294;ENSMUSP00000077290;ENSMUSP00000106085;ENSMUSP00000100047	SRKESYSVYVYKVLKQVHPDTGISSKAMGIMNSFVNDIFER	K12(ICPL); K26(ICPL:13C(6)); M31(Oxidation)	4955.45				0.002922	0.0708054					19.17	0.658565
ENSMUSP00000135427;ENSMUSP00000073561;ENSMUSP00000097294;ENSMUSP00000077290;ENSMUSP00000106085;ENSMUSP00000100047	KESYSVYVYKVLKQVHPDTGISSKAMGIMNSFVNDIFER	K1(ICPL:13C(6)); K10(ICPL:13C(6)); K13(ICPL:13C(6)); K24(ICPL:13C(6)); M26(Oxidation); M29(Oxidation)	4956.41				0	7.20182e-07					50.45	0.000503527
ENSMUSP00000135427;ENSMUSP00000073561;ENSMUSP00000097294;ENSMUSP00000077290;ENSMUSP00000100047;ENSMUSP00000106085	STITSREIQTAVR		1461.8				3.6e-05	0.000458733	17.07	0.310211	17.15	0.29973	25.23	0.0508358
ENSMUSP00000135427;ENSMUSP00000073561;ENSMUSP00000097294;ENSMUSP00000077290;ENSMUSP00000100047;ENSMUSP00000076397	LLLPGELAKHAVSEGTKAVTKYTSSK	K9(ICPL:13C(6)); K17(ICPL:13C(6)); K21(ICPL:13C(6))	3061.64				0	1.46437e-06	31.82	0.0175923
ENSMUSP00000135427;ENSMUSP00000073561;ENSMUSP00000097294;ENSMUSP00000077290;ENSMUSP00000100047;ENSMUSP00000076397	LLLPGELAKHAVSEGTKAVTKYTSSK	K9(ICPL); K17(ICPL); K21(ICPL); K26(ICPL)	3148.61				0	1.47105e-06	38.32	0.00602176	33.41	0.0184467	47.2	0.000734555
ENSMUSP00000135427;ENSMUSP00000073561;ENSMUSP00000097294;ENSMUSP00000077290;ENSMUSP00000100047;ENSMUSP00000076397	LLLPGELAKHAVSEGTKAVTKYTSSK	K9(ICPL:13C(6)); K17(ICPL:13C(6)); K21(ICPL:13C(6)); K26(ICPL:13C(6))	3172.69				0	7.36506e-06	36.23	0.00636079	34.77	0.00868576	28.95	0.0317102
ENSMUSP00000135427	PDPAKSAPAPKKGSKKAVTKVQKKDGKKR	N-Term(ICPL); K5(ICPL); K11(ICPL); K12(ICPL); K15(ICPL); K16(ICPL); K20(ICPL); K23(ICPL); K24(ICPL); K27(ICPL); K28(ICPL)	4229.07	0.0238344	1;-;-		0	8.44201e-09	47.66	0.000851837	23.93	0.201681	49.15	0.000605053
ENSMUSP00000135427	PDPAKSAPAPKKGSKKAVTKVQKKDGKKR	N-Term(ICPL); K5(ICPL); K11(ICPL:13C(6)); K12(ICPL:13C(6)); K15(ICPL:13C(6)); K16(ICPL:13C(6)); K20(ICPL:13C(6)); K23(ICPL:13C(6)); K24(ICPL:13C(6)); K27(ICPL:13C(6)); K28(ICPL:13C(6))	4283.27				0	6.84094e-05	11.84	2.26831	17.66	0.481622	25.21	0.0777356
ENSMUSP00000135427	PDPAKSAPAPKKGSKKAVTKVQKKDGKKR	K5(ICPL); K11(ICPL); K12(ICPL); K15(ICPL); K16(ICPL); K20(ICPL); K23(ICPL); K24(ICPL); K27(ICPL); K28(ICPL)	4124.04	0.767277	-;-;2		0	5.96761e-06			10.84	4.11657	28.27	0.0738723
ENSMUSP00000135427	PDPAKSAPAPKKGSKKAVTKVQKKDGKKR	N-Term(ICPL:13C(6)); K11(ICPL:13C(6)); K12(ICPL:13C(6)); K15(ICPL:13C(6)); K16(ICPL:13C(6)); K20(ICPL:13C(6)); K23(ICPL:13C(6)); K24(ICPL:13C(6)); K27(ICPL:13C(6)); K28(ICPL:13C(6))	4184.26				0	2.04053e-05					22.78	0.0906835
ENSMUSP00000135427	PDPAKSAPAPKKGSKKAVTKVQKKDGKKR	N-Term(ICPL:13C(6)); K5(ICPL:13C(6)); K11(ICPL:13C(6)); K12(ICPL:13C(6)); K15(ICPL:13C(6)); K16(ICPL:13C(6)); K20(ICPL:13C(6)); K23(ICPL:13C(6)); K24(ICPL:13C(6)); K27(ICPL:13C(6)); K28(ICPL:13C(6))	4295.3	6.80962	-;-;1		0	2.14194e-09					43.49	0.0010566
ENSMUSP00000135384	QKMDVKSALSTVR	K2(ICPL:13C(6)); K6(ICPL:13C(6))	1684.89	0.810443	-;1;-		9.3e-05	0.00102134			11.95	1.1776
ENSMUSP00000135384	EIGPNDGFLAQLCQLNDR	C13(Carbamidomethyl)	2059.99				0	1.3869e-05			25.25	0.0474676	18.74	0.217865
ENSMUSP00000135319	KIHVIR	K1(ICPL)	870.531	0.899464	1;1;-	9.3801	0.000532	0.00635128	12.09	0.36463	30.57	0.0051743	17.19	0.112681
ENSMUSP00000135319	AVENELLDR		1058.55				0.000247	0.00598376	34.26	0.00446218	27.72	0.0201162	30.76	0.00998957
ENSMUSP00000135319	LFMDDQEVAVVYFR		1731.84				0	0.000512027	18.26	0.278406
ENSMUSP00000135319	VGLLEALLPGQPEAVAR		1733				6.7e-05	0.000925439	33.72	0.00397019	20.47	0.0857044	20.28	0.0881308
ENSMUSP00000135319	ASYILMEKIEPEPFR	K8(ICPL)	1927.96				0	4.05611e-05	30.48	0.0221603
ENSMUSP00000135319	ASYILMEKIEPEPFR	K8(ICPL:13C(6))	1933.98	0.97363	1;1;-	35.7376	0	8.54012e-07	42.87	0.00152343	30.68	0.0252245
ENSMUSP00000135319	DGYMPSQYNSQNWEAR		1945.81				0	1.26889e-09	41.67	0.000129346	78.11	2.78146e-08	58.57	2.64091e-06
ENSMUSP00000135319	NCLLRPGSPAQVVQCISELGIFGVYVR	C2(Carbamidomethyl); C15(Carbamidomethyl)	3032.58				0	8.23776e-05	21.3	0.24315	25.34	0.0896253
ENSMUSP00000135319	ATFAGLYSLDMGEEGDQAIAEALAAPSHFVLKPQR	K32(ICPL:13C(6))	3814.88	1.02239	1;-;1	31.4878	0	5.92277e-13	24.93	0.139152			57.85	6.90688e-05
ENSMUSP00000135319	KIHVIR	K1(ICPL:13C(6))	876.55	0.746687	-;-;1		0.000358	0.0100879			24.44	0.00503649	21.71	0.00944339
ENSMUSP00000135319	QGTTLVMNKHVGHLLR	K9(ICPL:13C(6))	1915.04				9.8e-05	0.00264419					13.91	0.636084
ENSMUSP00000135244	MALKQISSNR	M1(Oxidation)	1163.62				0.002069	0.0405525	19.85	0.134051
ENSMUSP00000135244	LQEGYDHSYYFIATFIADHIR		2559.23				0	3.60952e-07	44.46	0.00102237	52.85	0.000151749	44.73	0.000977566
ENSMUSP00000135244	MYSYVTEELPQLINANFPVDPQR		2724.33				0	7.66744e-09	106.8	6.6753e-10	106.68	6.84084e-10	82.43	1.81444e-07
ENSMUSP00000135244	CFGGLQKVFEHSSVELKCKMR	C1(Carbamidomethyl); K7(ICPL:13C(6)); K17(ICPL:13C(6)); C18(Carbamidomethyl); K19(ICPL:13C(6))	2873.38	3.19581	1;-;-		0	8.8062e-05	11.7	2.01473	11.79	2.00652
ENSMUSP00000135244	MSIFGHSMGGHGALICALKNPGKYR	C16(Carbamidomethyl); K19(ICPL); K23(ICPL)	2912.4	1.04548	3;-;2	0.380543	0	7.37534e-10	37.53	0.00550121	27.33	0.0576047	65.25	1.03444e-05
ENSMUSP00000135244	MSIFGHSMGGHGALICALKNPGKYR	C16(Carbamidomethyl); K19(ICPL:13C(6)); K23(ICPL:13C(6))	2924.43	1.03217	1;3;3	3.35313	0	6.60163e-11	54.86	0.000106141	36.22	0.00759324	49.89	0.000337952
ENSMUSP00000135244	MSIFGHSMGGHGALICALKNPGKYR	M8(Oxidation); C16(Carbamidomethyl); K19(ICPL:13C(6)); K23(ICPL:13C(6))	2940.42	1.18057	-;1;2		0	1.14743e-05	25.7	0.0789965	11.39	2.10208	34.15	0.0104417
ENSMUSP00000134976	LRDHLLESEDSHTR		1707.84				0	1.16264e-07	22.94	0.0848626	15.53	0.41285	38.92	0.00203891
ENSMUSP00000134920	AVDDGVNTFKVLTR	K10(ICPL:13C(6))	1645.87	1.27032	-;1;-		0	3.20101e-06			41.23	0.00144644
ENSMUSP00000134696	IEGSGDQVDTLELSGGAR		1803.87				0	1.67957e-09	66.52	3.57664e-06	30.1	0.0155869	72.15	9.75259e-07
ENSMUSP00000134696	RPVSSVHPPGRPPAVR		1708.97				0.001769	0.0451924			11	0.671207	10.98	0.662336
ENSMUSP00000134696	SQKDIEGKKDIR	K3(ICPL:13C(6)); K8(ICPL:13C(6)); K9(ICPL:13C(6))	1749.9				0.000919	0.0136305			10.79	1.87161
ENSMUSP00000134696	SKLQSQLLSLEKEVEEYKNFRPDDPTR	K2(ICPL:13C(6)); K12(ICPL:13C(6)); K18(ICPL:13C(6))	3582.8				0	1.10357e-06					39.62	0.00478051
ENSMUSP00000134695	RYPAGASAPHCEMSR	C11(Carbamidomethyl)	1689.76				0	0.000169457			29.37	0.00474006
ENSMUSP00000134676	HTPLSKLMKAYCER	K6(ICPL:13C(6)); K9(ICPL:13C(6)); C12(Carbamidomethyl)	1955.96	1.33048	-;2;1		0	1.26316e-05			44.5	0.000729142	36.74	0.00461803
ENSMUSP00000134663	KEAYVHKSVMEELKR	K1(ICPL); K7(ICPL); K14(ICPL)	2162.04				0	6.51241e-06	27.7	0.0343045
ENSMUSP00000134570	YISVGYVDNKEFVR	K10(ICPL:13C(6))	1799.91	0.950557	-;-;1		0	5.25871e-05					16.6	0.485683
ENSMUSP00000134521	LLADPTGAFGKATDLLLDDSLVSLFGNRR	K11(ICPL)	3180.67				0	0.000160595	13.92	1.0746	19.26	0.31245	13.37	1.21278
ENSMUSP00000134521	LLADPTGAFGKATDLLLDDSLVSLFGNRR	K11(ICPL:13C(6))	3186.69	0.999749	3;2;3	1.71001	0	4.26258e-10	55.49	7.03395e-05	65.54	6.70211e-06	77.32	4.63383e-07
ENSMUSP00000134447	NECNQCKAPKPDGPGGGPGGSHMGGNYGDDR	C3(Carbamidomethyl); C6(Carbamidomethyl); K7(ICPL:13C(6)); K10(ICPL:13C(6))	3408.41	0.499459	-;1;-		0	5.34332e-08			16.84	0.0217365	26.74	0.00391897
ENSMUSP00000134447	AGDWKCPNPTCENMNFSWR	K5(ICPL); C6(Carbamidomethyl); C11(Carbamidomethyl)	2475	0.413665	-;-;1		9.8e-05	0.00225071					12.19	0.0602518
ENSMUSP00000134447	NECNQCKAPKPDGPGGGPGGSHMGGNYGDDR	C3(Carbamidomethyl); C6(Carbamidomethyl); K7(ICPL); K10(ICPL)	3396.35	0.407628	-;-;1		0	2.56574e-09					35.66	0.000271
ENSMUSP00000134365	IENVVLDANCSR	C10(Carbamidomethyl)	1389.68				0	1.59995e-06	50.9	0.000125582	53.34	7.16025e-05
ENSMUSP00000134342;ENSMUSP00000081239	TGYTLDVTTGQR		1311.65				0	7.66686e-05	34.03	0.00650378	40.81	0.00131116	41.42	0.00133765
ENSMUSP00000134342	LMMDPLTGLNR		1260.64				0	4.49473e-07	35.6	0.00578388	55.03	6.45375e-05	59	2.63745e-05
ENSMUSP00000134342	NLANTVTEEILEKSFSQFGKLER	K13(ICPL); K20(ICPL)	2863.43	0.91741	-;1;1		0	2.52777e-07	11.42	2.38326	23.09	0.157581	55.98	8.25178e-05
ENSMUSP00000134342	NLANTVTEEILEKSFSQFGKLER	K13(ICPL:13C(6)); K20(ICPL:13C(6))	2875.48	0.975595	1;-;1	6.00544	0	0.000155412	31.83	0.0199796			24.58	0.102411
ENSMUSP00000134342	SGKHIGVCISVANNR	K3(ICPL:13C(6)); C8(Carbamidomethyl)	1722.88	1.26967	-;1;1		0	0.000450542			12.46	1.294	21.11	0.176577
ENSMUSP00000134342	VKKLKDYAFIHFDER	K2(ICPL:13C(6)); K3(ICPL:13C(6)); K5(ICPL:13C(6))	2242.16	0.748972	-;1;-		0	2.78305e-06			22.85	0.139038
ENSMUSP00000134342	EKQGTKVADSSKGPDEAKIKALLER	K2(ICPL); K6(ICPL); K12(ICPL); K18(ICPL); K20(ICPL)	3223.6	0.965789	-;1;-		0	2.7433e-06			47.13	0.000765855
ENSMUSP00000134342	KYGGPPPDSVYSGQQPSVGTEIFVGKIPR	K1(ICPL:13C(6)); K26(ICPL:13C(6))	3282.66				0	2.23847e-09			51.83	0.000282799	36.56	0.00908594
ENSMUSP00000134342	SGKHIGVCISVANNR	K3(ICPL); C8(Carbamidomethyl)	1716.86				0.000911	0.0249107					11.12	1.62649
ENSMUSP00000134318	VGLELIASENFASR		1505.8				0	1.32885e-06	40.06	0.00184927	45.74	0.00050537	46.68	0.000428492
ENSMUSP00000134318	YYGGTEFIDELEMLCQKR	C15(Carbamidomethyl); K17(ICPL:13C(6))	2363.08	1.13077	1;1;2	1.62861	0	6.72367e-06	25.95	0.0325245	20.4	0.116737	31.75	0.00791988
ENSMUSP00000134318	AVLEALGSCLNNKYSEGYPGQR	C9(Carbamidomethyl); K13(ICPL)	2531.2	1.12578	1;-;-		0.000146	0.00124699	16.62	0.442075
ENSMUSP00000134318	ALSDALTELGYKIVTGGSDNHLILMDLR	K12(ICPL)	3120.61				0	5.52369e-11	22.23	0.217523			54.99	0.000112203
ENSMUSP00000134318	ALSDALTELGYKIVTGGSDNHLILMDLR	K12(ICPL:13C(6))	3126.62	0.76517	-;-;2		0	5.21929e-11	44.25	0.00117825			73.24	1.48675e-06
ENSMUSP00000134318	ALQAYHLDPQCWGVNVQPYSGSPANFAVYTALVEPHGR	C11(Carbamidomethyl)	4213.04				0	2.09705e-05	31.82	0.027227	35.03	0.014305	39.5	0.00507713
ENSMUSP00000134318	AVLEALGSCLNNKYSEGYPGQR	C9(Carbamidomethyl); K13(ICPL:13C(6))	2537.22	1.01617	-;1;-		0	6.43132e-06			26.72	0.0482023
ENSMUSP00000134318	AEKVLEACSIACNKNTCPGDKSALRPSGLR	K3(ICPL); C8(Carbamidomethyl); C12(Carbamidomethyl); K14(ICPL); C17(Carbamidomethyl); K21(ICPL)	3617.7	0.941254	-;1;3		0	5.46868e-08			50.8	0.000231646	95.98	6.97742e-09
ENSMUSP00000134318	AEKVLEACSIACNKNTCPGDKSALRPSGLR	K3(ICPL:13C(6)); C8(Carbamidomethyl); C12(Carbamidomethyl); K14(ICPL:13C(6)); C17(Carbamidomethyl); K21(ICPL:13C(6))	3635.76	1.03136	-;2;1		0	7.76413e-10			100.18	3.49222e-09	71.43	2.46771e-06
ENSMUSP00000134318	DATLWASHEKMLSQPLKDSDAEVYSIIKKESNR	K10(ICPL:13C(6)); K17(ICPL:13C(6)); K28(ICPL:13C(6)); K29(ICPL:13C(6))	4234.09				9.3e-05	0.00102943			13.72	1.8471
ENSMUSP00000134318	GLLEEDFQKVAHFIHR	K9(ICPL:13C(6))	2050.06	0.972191	-;-;1		0	6.65757e-08					25.1	0.0723129
ENSMUSP00000134290;ENSMUSP00000093109	IDFSKLTSLNVKYNNDKSR	K5(ICPL:13C(6)); K12(ICPL:13C(6)); K17(ICPL:13C(6))	2575.3				0	1.41846e-05	15.53	0.926463			37.31	0.0063444
ENSMUSP00000134290;ENSMUSP00000093109	IDFSKLTSLNVKYNNDKSR	K5(ICPL); K12(ICPL); K17(ICPL)	2557.26				5e-05	0.000712016			12.19	2.08966	10.56	3.00626
ENSMUSP00000134290	SQPVYIQYSNHR		1491.73				0	1.06376e-05	41.75	0.000955732	58.46	2.04575e-05	49.87	0.000149921
ENSMUSP00000134290	EGQEDQGLTKDFSNSPLHR	K10(ICPL:13C(6))	2269.05	1.05768	-;1;1		0	0.000215777			15.12	0.487561	18.83	0.206196
ENSMUSP00000134290	LYGKVLR	K4(ICPL:13C(6))	959.575	1.02443	-;-;1		0.009299	0.230608					11.26	0.235673
ENSMUSP00000134138	TLHKIKCR	K4(ICPL); K6(ICPL); C7(Carbamidomethyl)	1265.66	0.854493	4;2;2	7.42493	3.6e-05	0.000319666	19.16	0.228117	21.5	0.13451	19.04	0.237003
ENSMUSP00000134138	TLHKIKCR	K4(ICPL:13C(6)); K6(ICPL:13C(6)); C7(Carbamidomethyl)	1277.7	1.03583	1;2;3	18.5685	0	0.000102849	16.6	0.303005	19.44	0.16325	19.24	0.164987
ENSMUSP00000134138	ESVQVPDDQDFR		1434.65				0	0.000191424	24.09	0.0272959	43.02	0.000376658	31.81	0.00461422
ENSMUSP00000134138	LTVNADVGYYSWR		1543.75				0	6.25192e-07	74.62	5.24618e-07	59.7	1.62871e-05	46.58	0.000334075
ENSMUSP00000134138	KKWDSNVIETFDIAR	K1(ICPL); K2(ICPL)	2031.99				0	3.83558e-09	57.52	3.63757e-05	56.55	4.92414e-05	17.94	0.3704
ENSMUSP00000134138	KKWDSNVIETFDIAR	K1(ICPL:13C(6)); K2(ICPL:13C(6))	2044.03	0.725149	1;2;1	11.1067	0	5.4988e-08	59.95	2.55424e-05	60.33	2.08073e-05	48.38	0.00036085
ENSMUSP00000134138	MECCDVPAETLYDVLHDIEYR	C3(Carbamidomethyl); C4(Carbamidomethyl)	2628.14				0	2.07938e-08	26.95	0.0131194	44.44	0.000208655	47.77	9.69233e-05
ENSMUSP00000134123;ENSMUSP00000008893	FYKLHER	K3(ICPL)	1097.55				0.003833	0.0685522			11.49	0.879876
ENSMUSP00000134123;ENSMUSP00000008893	FYKLHER	K3(ICPL:13C(6))	1103.57				0.000213	0.00371837			20.79	0.131722	27.9	0.0238406
ENSMUSP00000134123	HVFGQPAKADQCYEDVR	K8(ICPL:13C(6)); C12(Carbamidomethyl)	2130.97				0	1.08885e-07			41.67	0.000874789	47.14	0.000238598
ENSMUSP00000134097	VEGAHSLSAASVSSKHEGR	K15(ICPL:13C(6))	2019.99				0	0.000447537			22.06	0.125082
ENSMUSP00000134078	ISMINNPSQEISDSSTPIFR		2236.09				0	9.66945e-05			38.37	0.00327478
ENSMUSP00000134072	TVVAGSSEAAQKAVR	K12(ICPL:13C(6))	1584.85				0	0.000214232			43.26	0.000911082	40.34	0.00176617
ENSMUSP00000134072	GVPESLASGEGAGAGLPALDLAKAQR	K23(ICPL:13C(6))	2546.33				0.000133	0.00208189			14.41	1.20627
ENSMUSP00000134069	ETLAQLQQEFQR		1490.76				0	9.90052e-06	43.09	0.000795271	57.46	3.02413e-05	49.48	0.000206841
ENSMUSP00000134035	RPSTFGIPR		1030.58				6.7e-05	0.000963335	18.85	0.201339	30.29	0.014452	37.73	0.00229371
ENSMUSP00000133991	VTHIKVMCEGGR	K5(ICPL:13C(6)); C8(Carbamidomethyl)	1497.74				0	0.000142303			22.71	0.0822448
ENSMUSP00000133921	WLKELR	K3(ICPL)	949.525				0.000935	0.0257515	21.28	0.0930915			20.51	0.110706
ENSMUSP00000133921	WLKELR	K3(ICPL:13C(6))	955.545	1.13456	1;-;1	8.66107	6.7e-05	0.000961762	21.73	0.0694929			23.67	0.044457
ENSMUSP00000133921	DHADSNIVIMLVGNKSDLR	K15(ICPL:13C(6))	2208.12	1.10533	1;1;-	1.84176	0	0.000118343	32.81	0.0142943	20.19	0.244084
ENSMUSP00000133921	SIQVDGKTIKAQIWDTAGQER	K7(ICPL); K10(ICPL)	2554.27	0.926176	-;-;1		0	7.54378e-07					23.52	0.143171
ENSMUSP00000133921	SIQVDGKTIKAQIWDTAGQER	K7(ICPL:13C(6)); K10(ICPL:13C(6))	2566.31				0	3.1075e-06					21.51	0.234497
ENSMUSP00000133867	QLVHELDEAEYQEIR		1871.91				0	1.38709e-09	67.06	3.57171e-06	79.32	2.15188e-07	80.55	1.57267e-07
ENSMUSP00000133867	GDAVAKAAKQPHVGDYR	K6(ICPL); K9(ICPL)	1992.97	1.48286	1;-;-		0	1.32454e-06	28.53	0.0300904	29.47	0.0243471
ENSMUSP00000133867	VHPEAQAKVDVFR	K8(ICPL:13C(6))	1606.84	1.20012	-;1;-		0.000133	0.00244648			15.75	0.566734
ENSMUSP00000133867	GDAVAKAAKQPHVGDYR	K6(ICPL:13C(6)); K9(ICPL:13C(6))	2005.01	1.34625	-;2;2		0	6.36558e-09			55.35	6.81219e-05	52.21	0.00014849
ENSMUSP00000133859	ELPRPEGLQR		1194.66				0.003255	0.0800079	23.22	0.0626507	22.05	0.0820211	23.28	0.0617911
ENSMUSP00000133859	LLSPGSVMLVSAR		1329.76				0	2.21691e-07	70.59	7.15837e-07	51.96	5.25356e-05	38.32	0.00121466
ENSMUSP00000133859	DMLYQVLAAEEPSVR		1720.86				0	8.14156e-05	27.14	0.0487822			44.2	0.000946672
ENSMUSP00000133859	VLSYAPGPLDNDMQQLAR		1987.99				0	2.61073e-11	60.64	2.1445e-05	73.82	1.03116e-06	88.66	3.32193e-08
ENSMUSP00000133859	VLSYAPGPLDNDMQQLAR	M13(Oxidation)	2003.99				0	0.000170083	40.26	0.00187436	41.48	0.00144732	41.78	0.0013474
ENSMUSP00000133859	QLKEELGAQQPDLKVVLAAADLGTEAGVQR	K3(ICPL); K14(ICPL)	3357.75	1.07384	1;-;-		0	3.343e-06	41.18	0.0024196			10.13	3.15416
ENSMUSP00000133859	QLKEELGAQQPDLKVVLAAADLGTEAGVQR	K3(ICPL:13C(6)); K14(ICPL:13C(6))	3369.78	1.16794	-;-;1		0	0.000155978	27.97	0.0386203	30.92	0.0201465	18.41	0.328081
ENSMUSP00000133843	MSADQLLR		933.48				0.002108	0.0535613					20.1	0.126552
ENSMUSP00000133822	APPQTQLPSGASSGTGSASATHGGAPLPGTR		2816.39				0	3.38017e-11	46.47	0.000785602	51.73	0.000217207	57.41	6.18183e-05
ENSMUSP00000133822	RLQPFLQR		1057.63				0.005758	0.153721					21.13	0.0547341
ENSMUSP00000133822	LVMAQHMIR		1098.59				0.000247	0.00370196			10.44	1.38258	21.06	0.124565
ENSMUSP00000133822	YCEVLGAAATTDYNNNHEGREEDQR	C2(Carbamidomethyl)	2912.26				0	2.57802e-05					28.46	0.00498963
ENSMUSP00000133732	NVKFKILDAVVAQEPLHR	K3(ICPL:13C(6)); K5(ICPL:13C(6))	2299.28	0.937725	-;1;-		0	2.77324e-09			23.76	0.0563774	33.96	0.005384
ENSMUSP00000133678	ETCPSLQGVHNTSYPR	C3(Carbamidomethyl)	1845.85				0.000185	0.00258508	18.93	0.1644			15.47	0.387376
ENSMUSP00000133678	SVLAWHSR		955.509				9.3e-05	0.00110539			31.26	0.00673353	24.09	0.0350948
ENSMUSP00000133605	VVNSETPVVVDFHAQWCGPCKILGPR	C17(Carbamidomethyl); C20(Carbamidomethyl); K21(ICPL:13C(6))	3076.53	1.17333	1;1;1	9.29011	0	2.39915e-07	19.04	0.455295	13.95	1.5565	46.29	0.000869364
ENSMUSP00000133349	FLSNCNPEQLER	C5(Carbamidomethyl)	1506.7				0	1.89423e-06	58.38	1.41581e-05	42.98	0.000513571	21.4	0.0728058
ENSMUSP00000133282	QTPAAPETEEEPYR		1617.74				0	2.85523e-05	27.38	0.0113342			21.08	0.0495192
ENSMUSP00000133282	TSDGKVITVPHKIITHLR	K5(ICPL:13C(6)); K12(ICPL:13C(6))	2237.26	0.972349	1;-;2	21.728	0	3.74159e-06	12.15	0.679634			24.13	0.0496482
ENSMUSP00000133282	TSDGKVITVPHKIITHLR	K5(ICPL); K12(ICPL)	2225.22				0	0.000160825					12.42	1.03962
ENSMUSP00000133117	RIEILR		799.514				0.001283	0.0364927	16.16	0.0593152	27.19	0.00467914	18.74	0.0327466
ENSMUSP00000133117	AQLIDMKR	K7(ICPL)	1079.57	0.828722	1;-;-		0.001252	0.0214285	17.34	0.237084
ENSMUSP00000133117	MELERPGKDGGSR	K8(ICPL)	1536.72	0.813363	1;-;-		0.007673	0.148548	13.5	0.687893
ENSMUSP00000133117	MELERPGKDGGSR	K8(ICPL:13C(6))	1542.74	0.827674	1;2;2	26.8075	0	0.000149257	10.46	1.46168	21.95	0.106271	16.43	0.378804
ENSMUSP00000133117	MKGLIDEANQDFTNR	K2(ICPL:13C(6))	1862.88	1.12876	1;1;1	8.99171	0	5.97738e-12	31.68	0.0107654	59.46	1.94207e-05	84.08	6.54659e-08
ENSMUSP00000133117	SCSKTITKTVTGPDGRR	C2(Carbamidomethyl); K4(ICPL); K8(ICPL)	2074.01	0.762625	2;1;1	24.9218	0.000247	0.00410501	18.87	0.280191	15.06	0.767247	15.48	0.622906
ENSMUSP00000133117	MELERPGKDGGSRGDSPGDSR	K8(ICPL:13C(6))	2314.06	1.3564	1;-;1	22.6163	0.002059	0.0512054	14.09	0.485478			13.2	0.595894
ENSMUSP00000133117	GDFANANNFDNTYGQVSEDLRR		2503.12				0	2.43812e-09	71.06	6.85501e-07	73.36	4.33639e-07	80.76	7.89092e-08
ENSMUSP00000133117	KEYHTGKAVTSKGDKELLIGKEKVTSSGTSTTHR	K1(ICPL); K7(ICPL); K12(ICPL); K15(ICPL); K21(ICPL); K23(ICPL)	4304.06	0.747681	1;1;-	47.7444	0	9.74197e-06	17.5	0.870468	26.87	0.101355
ENSMUSP00000133117	VGSEAEGYALQVSSYR		1715.82				0.000133	0.00192818			27.01	0.0321494
ENSMUSP00000133117	EINLQDYEGHQKQLQQVIAKELLPTKDR	K12(ICPL:13C(6)); K20(ICPL:13C(6)); K26(ICPL:13C(6))	3667.9	0.80347	-;1;-		0	0.000638728			10.1	4.1386
ENSMUSP00000133117	AQLIDMKR	K7(ICPL:13C(6))	1085.59	0.905934	-;-;1		0.001256	0.0364469					13.23	0.819953
ENSMUSP00000133117	INKLKNSLFDFQR	K3(ICPL:13C(6)); K5(ICPL:13C(6))	1844.98	1.06174	-;-;3		0	3.33438e-07					39.59	0.00204415
ENSMUSP00000133117	SCSKTITKTVTGPDGRR	C2(Carbamidomethyl); K4(ICPL:13C(6)); K8(ICPL:13C(6))	2086.05	1.28195	-;-;2		3.6e-05	0.000263972					30.72	0.0192744
ENSMUSP00000133117	RKVIEKAQQIQALQSNVR	K2(ICPL:13C(6)); K6(ICPL:13C(6))	2331.31	1.63831	-;-;2		0	0.000146404					28.14	0.0125839
ENSMUSP00000133099	EKAEEDRYFR	K2(ICPL)	1447.66	1.01214	1;1;-	4.00125	0.00221	0.0368121	13.56	0.334822	15.33	0.227144	16.43	0.169495
ENSMUSP00000133099	EKTKEQLAALR	K2(ICPL); K4(ICPL)	1496.79				0	5.03249e-05	35.3	0.00509084	34.4	0.0062631	16.69	0.367506
ENSMUSP00000133099	EKTKEQLAALR	K2(ICPL:13C(6)); K4(ICPL:13C(6))	1508.83	0.893941	1;1;2	4.50982	0	3.22633e-06	49.19	0.000191601	44.39	0.000574986	42.56	0.000881855
ENSMUSP00000133099	HKKKIQQLKNNH	K2(ICPL); K3(ICPL); K4(ICPL); K9(ICPL)	1935.97	0.846083	-;-;2		0	2.35203e-06	19.81	0.243942	34.38	0.008517	34.06	0.00920752
ENSMUSP00000133099	HKKKIQQLKNNH	K2(ICPL:13C(6)); K3(ICPL:13C(6)); K4(ICPL:13C(6)); K9(ICPL:13C(6))	1960.05	1.09377	1;2;-	3.9926	0	2.4534e-06	29.11	0.0190867	37.3	0.00289555	22.18	0.0941305
ENSMUSP00000133099	KHHEDEIDHHSKEIER	K1(ICPL); K12(ICPL)	2249.01	0.835184	-;-;1		0	7.92278e-08	23.32	0.0307287	31.13	0.00528069	38.8	0.000942554
ENSMUSP00000133099	KHHEDEIDHHSKEIER	K1(ICPL:13C(6)); K12(ICPL:13C(6))	2261.05	1.02319	5;2;1	15.2394	0	2.32057e-08	30.46	0.0144369	53.21	7.90311e-05	35.84	0.00427409
ENSMUSP00000133099	EKAEEDRYFR	K2(ICPL:13C(6))	1453.68	0.84213	-;-;1		0.001523	0.0419296					21.83	0.0843147
ENSMUSP00000133038	HEHQLMLMR		1194.58				0	0.000111824	40.78	0.00110717	26.15	0.0277847
ENSMUSP00000133038	FAQPGTFEFEYASR		1649.76				0	1.52873e-06	46.32	0.000173843	47.63	0.000125123	30.45	0.00662655
ENSMUSP00000133038	YGEPSEVFINR		1310.64				0.000462	0.00458702			12.45	0.671246	14.1	0.459073
ENSMUSP00000132771	GLQATQLAQGLGYTGAR		1704.9				0	4.49962e-10	29.33	0.0216443	71.34	1.41394e-06	74.6	6.72669e-07
ENSMUSP00000132771	RGLQATQLAQGLGYTGAR		1861				0	1.58951e-08	49.12	0.000231452	49.39	0.000230735	62.97	9.58856e-06
ENSMUSP00000132771	NYAGAYKEWLEKQG	K7(ICPL); K12(ICPL)	1866.85	0.987801	1;1;2	20.5686	0	3.87217e-06	39.71	0.00104233	20.07	0.092989	39.76	0.00101454
ENSMUSP00000132771	NYAGAYKEWLEKQG	K7(ICPL:13C(6)); K12(ICPL:13C(6))	1878.89				0	6.14816e-06	27.86	0.0243067	15.85	0.396524	29.9	0.0155541
ENSMUSP00000132590	GDFCIQVGR	C4(Carbamidomethyl)	1051.5				0	2.99243e-05	49.85	0.000113866	45.05	0.000261028	56.98	1.67373e-05
ENSMUSP00000132590	LVAMKFLR	K5(ICPL)	1082.62	0.924097	1;1;-	6.89673	0	8.75463e-05	26.39	0.0234207	31.44	0.0073215	40.51	0.000906985
ENSMUSP00000132590	LVAMKFLR	K5(ICPL:13C(6))	1088.64	0.961287	2;1;2	5.94608	0	7.70871e-05	34.65	0.00246793	38.4	0.00104072	43.03	0.000358371
ENSMUSP00000132590	GLVGEIIKR	K8(ICPL)	1089.64	0.985801	2;1;2	8.75029	0	3.56798e-06	42.83	0.000257991	42.99	0.000228566	56.39	1.13659e-05
ENSMUSP00000132590	GLVGEIIKR	K8(ICPL:13C(6))	1095.66	1.01207	4;1;3	11.7759	0	0.000154913	48.58	4.16027e-05	47.03	5.94458e-05	42.99	0.000150703
ENSMUSP00000132590	LVAMKFLR	M4(Oxidation); K5(ICPL)	1098.61	1.08834	1;-;-		3.6e-05	0.000450818	21	0.0742697			45.47	0.000322104
ENSMUSP00000132590	LVAMKFLR	M4(Oxidation); K5(ICPL:13C(6))	1104.63	1.09395	3;3;3	15.7287	0	3.79138e-05	47.95	0.000102608	27.23	0.0132464	53.63	3.03458e-05
ENSMUSP00000132590	TFIAIKPDGVQR	K6(ICPL)	1449.78				0	8.66595e-06	24.82	0.0484526	42.47	0.000872009
ENSMUSP00000132590	TFIAIKPDGVQR	K6(ICPL:13C(6))	1455.8	1.03062	4;2;5	7.77934	0	2.06503e-07	57.49	2.19233e-05	57.8	2.16576e-05	69	1.6429e-06
ENSMUSP00000132590	VMLGETNPADSKPGTIR		1785.92				0	5.94967e-05	50.19	0.000220633
ENSMUSP00000132590	VMLGETNPADSKPGTIR	M2(Oxidation)	1801.91				0	0.000407595	30.35	0.0227875
ENSMUSP00000132590	VMLGETNPADSKPGTIR	K12(ICPL)	1890.94	0.983295	1;1;-	3.02656	0	4.01866e-11	65.55	5.65583e-06	73.78	8.50151e-07	80.68	1.74434e-07
ENSMUSP00000132590	VMLGETNPADSKPGTIR	K12(ICPL:13C(6))	1896.96	0.97643	3;1;2	6.78058	0	1.04882e-09	79.65	2.86157e-07	52.29	0.000154042	80.93	2.11496e-07
ENSMUSP00000132590	VMLGETNPADSKPGTIR	M2(Oxidation); K12(ICPL)	1906.93	0.995042	1;-;-		0.000616	0.010275	14.62	0.712722
ENSMUSP00000132590	VMLGETNPADSKPGTIR	M2(Oxidation); K12(ICPL:13C(6))	1912.95	0.99429	-;-;1		0	1.60381e-09	95.68	6.84101e-09	64.95	7.93326e-06	95.47	7.39278e-09
ENSMUSP00000132321	SQNTPDSSASNLGFR		1580.73				0	8.68501e-09					76	2.58724e-07
ENSMUSP00000131514	GLQVHVVVDACSSR	C11(Carbamidomethyl)	1526.77				0	1.98548e-09	52.3	0.000209628	58.28	4.96303e-05	58.43	4.87349e-05
ENSMUSP00000131514	QSGAFLATSESLILQLVR		1933.08				0	1.8167e-07	80.34	1.18361e-07	92.7	6.20272e-09	83.73	5.74036e-08
ENSMUSP00000131514	SQLQSVLLCGIETQACILNTALDLLHR	C9(Carbamidomethyl); C16(Carbamidomethyl)	3066.61				0	6.25774e-10	62.05	1.94917e-05	53.74	0.000130182	70.44	2.76065e-06
ENSMUSP00000131514	ILPESSILFLCDLQEKFRPSIAYFPQIVSVAAR	C11(Carbamidomethyl); K16(ICPL)	3913.06				0	7.1944e-05	34.2	0.0111395
ENSMUSP00000131514	ILPESSILFLCDLQEKFRPSIAYFPQIVSVAAR	C11(Carbamidomethyl); K16(ICPL:13C(6))	3919.09	1.00569	-;1;-		0	1.28376e-07	37.06	0.00491972	48.18	0.0003885
ENSMUSP00000131323	LIVENLSSR		1030.59				0	0.000232408			25.12	0.0310686	37.8	0.00167618
ENSMUSP00000131174	FQTVHFFR		1081.56				0.000146	0.00127709	24.7	0.0570952	11.03	1.32528	17.77	0.266539
ENSMUSP00000131174	IAFSCPQKELPDLEDLMKR	C5(Carbamidomethyl); K8(ICPL:13C(6)); K18(ICPL:13C(6))	2512.24	0.993256	1;-;-		0	2.44618e-05	16.66	0.645166
ENSMUSP00000131174	ALLGYADNQCKLELQGIQGAVDHAAAFGR	C10(Carbamidomethyl); K11(ICPL:13C(6))	3197.59	1.07986	-;1;1		0	4.47825e-08	42.62	0.00200481	24.23	0.138191	52.97	0.000185211
ENSMUSP00000131174	KLEWPLSKVAEGIFETEAPGGYKFYLQDR	K1(ICPL:13C(6)); K8(ICPL:13C(6)); K23(ICPL:13C(6))	3704.89	1.05283	2;1;-	9.35802	0	0.000134676	13.19	2.03647	27.27	0.081656	40.57	0.00400789
ENSMUSP00000131174	KLEWPLSKVAEGIFETEAPGGYKFYLQDR	K1(ICPL); K8(ICPL); K23(ICPL)	3686.8	0.587729	-;1;1		0	3.5765e-07			18.91	0.564883	30.98	0.0345532
ENSMUSP00000131174	DVLGMQVLR		1030.57				0.000935	0.0258706					29.69	0.0173986
ENSMUSP00000130858	KFFVGGNWKMNGR	K1(ICPL); K9(ICPL)	1750.83	0.849357	1;2;-	16.4298	0	1.90981e-05	11.62	1.03642	49.26	0.000178458	39.3	0.00181522
ENSMUSP00000130858	KFFVGGNWKMNGR	K1(ICPL:13C(6)); K9(ICPL:13C(6))	1762.87	0.715552	-;-;2		0	1.38056e-07	38.58	0.00284978	46.04	0.000497771	53.9	8.0865e-05
ENSMUSP00000130858	GWLKSNVNDGVAQSTR	K4(ICPL)	1836.9	0.872911	2;-;1	13.614	0	1.47028e-11	82.71	1.02605e-07	75.72	5.13061e-07	76.97	3.84741e-07
ENSMUSP00000130858	GWLKSNVNDGVAQSTR	K4(ICPL:13C(6))	1842.92	0.89987	2;2;2	6.37008	0	1.90391e-11	93.1	1.05547e-08	107.63	3.78821e-10	84.45	7.66298e-08
ENSMUSP00000130858	KKCLGELICTLNAANVPAGTEVVCAPPTAYIDFAR	K1(ICPL); K2(ICPL); C3(Carbamidomethyl); C9(Carbamidomethyl); C24(Carbamidomethyl)	4029.96	0.810781	-;-;2		0	6.48347e-12	58.73	5.91467e-05	70.48	3.81425e-06	47.87	0.000721809
ENSMUSP00000130858	KKCLGELICTLNAANVPAGTEVVCAPPTAYIDFAR	K1(ICPL:13C(6)); K2(ICPL:13C(6)); C3(Carbamidomethyl); C9(Carbamidomethyl); C24(Carbamidomethyl)	4042.01	0.886035	1;1;-	6.96819	0	2.76411e-14	84.47	1.52734e-07	73.34	1.97892e-06
ENSMUSP00000130858	RHVFGESDELIGQKVSHALAEGLGVIACIGEKLDER	K14(ICPL); C28(Carbamidomethyl); K32(ICPL)	4143.08	1.03991	1;-;-		0	2.59166e-08	18.62	0.675342	16.82	1.03257	30.37	0.046238
ENSMUSP00000130858	HVFGESDELIGQKVSHALAEGLGVIACIGEKLDER	K13(ICPL:13C(6)); C27(Carbamidomethyl); K31(ICPL:13C(6))	3999	0.985471	-;1;-		0	7.32049e-05			17.58	0.851088
ENSMUSP00000130858	RHVFGESDELIGQKVSHALAEGLGVIACIGEKLDER	K14(ICPL:13C(6)); C28(Carbamidomethyl); K32(ICPL:13C(6))	4155.12	0.921405	-;1;-		0	2.73567e-08			29.54	0.0490274	32.91	0.0242537
ENSMUSP00000130722	APQQWATFAR		1175.59				0	0.000101814	27.83	0.0207668	30.38	0.0111779	20.75	0.106016
ENSMUSP00000130722	LDEYTQEEIEAFPR		1739.81				0	0.000105471					55.22	4.2536e-05
ENSMUSP00000130703	LIGPNCPGVINPGECKIGIMPGHIHKKGR	C6(Carbamidomethyl); C15(Carbamidomethyl); K16(ICPL); K26(ICPL); K27(ICPL)	3464.73	1.09228	1;-;1	12.0525	0	6.80291e-09	30.32	0.0397133	32.03	0.0266311	50.4	0.000394445
ENSMUSP00000130703	LIGPNCPGVINPGECKIGIMPGHIHKKGR	C6(Carbamidomethyl); C15(Carbamidomethyl); K16(ICPL:13C(6)); M20(Oxidation); K26(ICPL:13C(6)); K27(ICPL:13C(6))	3498.79	0.958301	1;1;-	14.9176	0	7.53048e-07	13.09	1.89	37.16	0.00721159	15.59	1.05454
ENSMUSP00000130703	LIGPNCPGVINPGECKIGIMPGHIHKKGR	C6(Carbamidomethyl); C15(Carbamidomethyl); K16(ICPL); M20(Oxidation); K26(ICPL); K27(ICPL)	3480.7	0.906352	-;-;1		0	4.69346e-07			12.55	2.33202	47.87	0.000672001
ENSMUSP00000130703	LIGPNCPGVINPGECKIGIMPGHIHKKGR	C6(Carbamidomethyl); C15(Carbamidomethyl); K16(ICPL:13C(6)); K26(ICPL:13C(6)); K27(ICPL:13C(6))	3482.8	1.07065	-;4;3		0	1.50714e-07			57.94	5.61626e-05	50.23	0.000338111
ENSMUSP00000130580	VHMTWVQPR		1153.59				0	9.08086e-05	26.95	0.0307801			39.03	0.00190665
ENSMUSP00000130580	FLGCVDIKDLPVSEQQER	C4(Carbamidomethyl); K8(ICPL:13C(6))	2244.11	1.15746	1;-;-		0.000262	0.00477996	14.45	0.899099
ENSMUSP00000130580	FYDLSSKYYQTIGNHASYYKDALR	K7(ICPL:13C(6)); K20(ICPL:13C(6))	3125.48				0	1.33081e-06	25.57	0.073909
ENSMUSP00000130580	VNPLSLVEIILHVVR		1701.04				0.000247	0.0042995					14.93	0.0610596
ENSMUSP00000130292	TVTQLVAEDGSR		1275.65				0.001221	0.0204245	23.67	0.0691554
ENSMUSP00000129970	LRVEFPR		916.536				0.000129	0.00296624	36.64	0.00181003	24.34	0.0307388	40.2	0.000797419
ENSMUSP00000129970	EAGDVCYADVYR	C6(Carbamidomethyl)	1417.61				0	0.000287178			50.94	2.05372e-05
ENSMUSP00000129970	TKDIEDVFYKYGAIR	K2(ICPL:13C(6)); K10(ICPL:13C(6))	2040.03	0.990324	-;1;-		0	5.79633e-06			28.63	0.0335866
ENSMUSP00000129970	GGPPFAFVEFEDPRDAEDAVYGR		2541.17				0	0.000120967			25.99	0.0371357
ENSMUSP00000129970	IYVGNLPPDIR		1256.7				0.004929	0.128387					15.04	0.390094
ENSMUSP00000129739	LQQEETQLEQSIQAGR		1857.93				0	9.78765e-12			91.83	1.34182e-08
ENSMUSP00000129633	MQQVEASLQPETLR		1629.82				0	4.91241e-11	83.92	7.68439e-08	75.69	5.13919e-07	71.2	1.46405e-06
ENSMUSP00000129544;ENSMUSP00000018637;ENSMUSP00000018632;ENSMUSP00000019625	LQNEVEDLMLDVER		1702.83				0	4.76922e-09	97.91	2.64556e-09	12.6	0.939715	98.51	2.36056e-09
ENSMUSP00000129544;ENSMUSP00000018637	IKKKMEGDLNEMEIQLNHSNR	K2(ICPL); K3(ICPL); K4(ICPL)	2842.32				0	2.36853e-11	55.98	5.55166e-05	50.72	0.000188932	59.9	2.18473e-05
ENSMUSP00000129544;ENSMUSP00000018637	IKKKMEGDLNEMEIQLNHSNR	K2(ICPL); K3(ICPL); K4(ICPL); M12(Oxidation)	2858.34				0	6.37282e-06			33.45	0.00901453	26.37	0.0461349
ENSMUSP00000129544	VRELEGEVESEQKR	K13(ICPL)	1792.88				0	2.40578e-06	29.71	0.0238934	23.79	0.0933851	31.5	0.0156102
ENSMUSP00000129544	MKKNMEQTVKDLQLR	K2(ICPL); K3(ICPL); K10(ICPL)	2177.06				0	9.67817e-08	31.9	0.0173681	16.12	0.656061	20.54	0.235341
ENSMUSP00000129544	NFDKILAEWKQKYEETHAELEASQKEAR	K4(ICPL); K10(ICPL); K12(ICPL); K25(ICPL)	3811.77				0	2.79282e-09	39.77	0.00332659	29.08	0.0383144	57.76	4.39673e-05
ENSMUSP00000129544	LKKKEFEMSNLQSKIEDEQAIGIQLQKKIKELQAR	K2(ICPL); K3(ICPL); K4(ICPL); K14(ICPL); K27(ICPL); K28(ICPL); K30(ICPL)	4877.46				0	0.000195297	31.18	0.0456866	26.97	0.114719
ENSMUSP00000129544	QLDEKEALVSQLSR	K5(ICPL)	1720.89				0	0.000590787			20.61	0.195516
ENSMUSP00000129544	QLEEEVKAKNALAHALQSSR	K7(ICPL); K9(ICPL)	2432.23				0	3.86956e-06			19.43	0.31813	14.15	1.07686
ENSMUSP00000129544	KLEGDLKLAQESIMDIENEKQQLDER	K1(ICPL); K7(ICPL); K20(ICPL)	3387.61				0	6.68008e-10			10.62	3.11239	52.75	0.000186871
ENSMUSP00000129544	SLGTELFKMKNAYEESLDQLETLKR	K8(ICPL); K10(ICPL); K24(ICPL)	3258.56				0	6.48991e-09					26.42	0.0629374
ENSMUSP00000129492	TQDLPGVKLKVVR	K8(ICPL:13C(6)); K10(ICPL:13C(6))	1674.97				0	4.44875e-07					33.99	0.00225449
ENSMUSP00000129492	LSTGKEAVCFIPGEGHTLQEHHVVLVEGGR	K5(ICPL:13C(6)); C9(Carbamidomethyl)	3367.7	1.11048	-;-;1		3.6e-05	0.000674145					15.73	1.2777
ENSMUSP00000129426	YICGEAPDYDR	C3(Carbamidomethyl)	1358.57				0.002398	0.0602218					15	0.0743135
ENSMUSP00000129426	KHNMCGDTEEEKIR	K1(ICPL:13C(6)); C5(Carbamidomethyl); K12(ICPL:13C(6))	1968.87				0	0.000227043					22.2	0.0385638
ENSMUSP00000129362	MTAKSASADLSR	K4(ICPL:13C(6))	1348.66	1.97884	1;-;-		0	1.24636e-06	25.13	0.0403576	62.91	6.70303e-06
ENSMUSP00000129362	NTTPTGAAPPAGMTSTR		1630.79				0.000262	0.00444004	15.55	0.431849
ENSMUSP00000129224	VQHRLPVQNGPIVHR		1750				0	2.45512e-05	23.11	0.0310294
ENSMUSP00000129023	AQTYELQESNVR		1437.69				0	1.13828e-05			62.89	6.55406e-06
ENSMUSP00000128915	VPLVPKVR	K6(ICPL)	1012.63	0.79859	1;-;-		0	6.57993e-05	36.28	0.000788942
ENSMUSP00000128915	VPLVPKVR	K6(ICPL:13C(6))	1018.65	1.07279	-;1;-		0.000213	0.00406994			23.65	0.00625703
ENSMUSP00000128803;ENSMUSP00000112861;ENSMUSP00000078715	VFDKEGNGTVMGAEIR	K4(ICPL:13C(6))	1833.89				0	5.37746e-10	63.13	7.75819e-06	84.74	5.5061e-08	68.64	2.27043e-06
ENSMUSP00000128803	TGDGKILYSQCGDVMR	K5(ICPL); C11(Carbamidomethyl)	1904.86	0.996561	-;1;1		0	6.28857e-10	35.54	0.00252725	36.08	0.00220711	66.91	1.89445e-06
ENSMUSP00000128803	TGDGKILYSQCGDVMR	K5(ICPL:13C(6)); C11(Carbamidomethyl)	1910.88	1.04063	2;-;1	1.28442	0	7.57439e-07	56.24	2.72148e-05	32.25	0.00619489	59	1.51701e-05
ENSMUSP00000128803	HVLVTLGEKMTEEEVEMLVAGHEDSNGCINYEELVR	K9(ICPL:13C(6)); C28(Carbamidomethyl)	4240.98				0.000185	0.00250229	24.23	0.107231
ENSMUSP00000128803	TGDGKILYSQCGDVMR	K5(ICPL:13C(6)); C11(Carbamidomethyl); M15(Oxidation)	1926.88	1.13999	-;-;1		0	3.75706e-08					50.18	9.88183e-05
ENSMUSP00000128487	ISELTSELTDER		1392.69				0	7.94637e-08	61	1.46156e-05	33.18	0.00884744	37.68	0.00314772
ENSMUSP00000128487	RFDSELSQAHEETQR		1832.85				0	4.95199e-06					15.11	0.299069
ENSMUSP00000128443	HFWGLR		815.431				0.000226	0.00363448	29.45	0.0130526	27.69	0.0198301	22.41	0.0668846
ENSMUSP00000128443	RYAHVVLR		1013.6				0.000272	0.00817789	30.38	0.0054057	33.75	0.00151811	28.37	0.00523965
ENSMUSP00000128443	VITIMQNPR		1071.6				3.6e-05	0.00037354	40.07	0.00129397	38.72	0.00176574	30.28	0.0123289
ENSMUSP00000128443	KADIDLTKR	K1(ICPL); K8(ICPL)	1269.66	1.05442	1;1;-	12.6814	0	0.000138428	36.98	0.0026459	35.06	0.00463155	23.76	0.0555359
ENSMUSP00000128443	KADIDLTKR	K1(ICPL:13C(6)); K8(ICPL:13C(6))	1281.7	0.928077	1;1;2	7.72488	0	0.000587427	42.05	0.000969908	43.51	0.00069968	43.4	0.000690203
ENSMUSP00000128443	QYKIPDWFLNR	K3(ICPL)	1584.8	1.037	2;1;-	7.11386	0	5.36907e-05	33.69	0.00805956	20.3	0.170319	17.18	0.35988
ENSMUSP00000128443	QYKIPDWFLNR	K3(ICPL:13C(6))	1590.82	0.921906	1;-;1	19.591	0	9.67851e-05	30.5	0.0179587	20.22	0.192022	29.81	0.0209989
ENSMUSP00000128443	KIAFAITAIKGVGR	K1(ICPL); K10(ICPL)	1654.94				0	3.62685e-07	45.2	0.000229516			43.26	0.000370569
ENSMUSP00000128443	KIAFAITAIKGVGR	K1(ICPL:13C(6)); K10(ICPL:13C(6))	1666.98	1.02079	2;2;2	4.04846	0	2.23635e-08	59.4	6.25744e-06	54.4	1.97878e-05	60.5	4.85732e-06
ENSMUSP00000128443	QKDVKDGKYSQVLANGLDNKLREDLER	K2(ICPL); K5(ICPL); K8(ICPL); K20(ICPL)	3551.73	0.804272	1;-;-		0.001928	0.037428	23.29	0.180962
ENSMUSP00000128443	QKDVKDGKYSQVLANGLDNKLREDLER	K2(ICPL:13C(6)); K5(ICPL:13C(6)); K8(ICPL:13C(6)); K20(ICPL:13C(6))	3575.82				0	1.60373e-08					73.93	1.68708e-06
ENSMUSP00000128443	QKDVKDGKYSQVLANGLDNKLR	K2(ICPL:13C(6)); K5(ICPL:13C(6)); K8(ICPL:13C(6)); K20(ICPL:13C(6))	2933.52	0.880498	-;1;1		0	2.45021e-05			25.25	0.0940396	13.04	1.64869
ENSMUSP00000128298	LPSLNKLR	K6(ICPL:13C(6))	1051.63				0	0.000597497			36.61	0.000654819
ENSMUSP00000127885	DNMFSGSKINYTEDR	K8(ICPL:13C(6))	1887.83	1.50026	1;-;1	35.6136	0	7.10108e-11	55.73	8.41997e-06			91.92	2.153e-09
ENSMUSP00000127833	EYFGGFGEVESIELPMDNKTNKR	K19(ICPL); K22(ICPL)	2870.31	0.916444	1;1;1	8.18589	0	9.2576e-08	29.2	0.0215806	16.62	0.364766	35.6	0.00477859
ENSMUSP00000127833	EYFGGFGEVESIELPMDNKTNKR	K19(ICPL:13C(6)); K22(ICPL:13C(6))	2882.35				0	1.60567e-06	28.89	0.0290524	15.36	0.586509	33	0.0112517
ENSMUSP00000127833	AKAMKTKEPVKKIFVGGLSPDTPEEKIR	K2(ICPL); K5(ICPL); K7(ICPL); K11(ICPL); K12(ICPL); K26(ICPL)	3727.88	1.04491	2;2;1	36.4492	0	8.99541e-08	35.97	0.0118371	48.65	0.00063726	35.34	0.0134511
ENSMUSP00000127833	AKAMKTKEPVKKIFVGGLSPDTPEEKIR	K2(ICPL:13C(6)); K5(ICPL:13C(6)); K7(ICPL:13C(6)); K11(ICPL:13C(6)); K12(ICPL:13C(6)); K26(ICPL:13C(6))	3763.97	1.00839	-;-;2		0	1.55249e-07	11.15	2.17931	31.3	0.022054	42.96	0.00180832
ENSMUSP00000127774	ARPTTDSFDDYPPR		1637.75				0	0.000529829	21.29	0.0657572	26.93	0.0199727	31.97	0.00619448
ENSMUSP00000127774	RGDDSFGDKYR	K9(ICPL)	1420.62				0.001376	0.0244804			14.18	0.0993055
ENSMUSP00000127774	RGDDSFGDKYR	K9(ICPL:13C(6))	1426.64	1.24937	-;2;-		0	0.000684399			29.4	0.00574077
ENSMUSP00000127774	LQKEQEKLQR	K3(ICPL:13C(6)); K7(ICPL:13C(6))	1521.82	1.16639	-;1;-		0	9.28437e-06			28.52	0.0210204	40.11	0.00152586
ENSMUSP00000127774	AASIFGGAKPVDTAAR	K9(ICPL:13C(6))	1642.86	1.15259	-;1;1		0	1.18842e-06			52.46	0.000101874	42.96	0.00142137
ENSMUSP00000127774	LNLKPR	K4(ICPL:13C(6))	851.519	1.27631	-;-;1		0.000693	0.0157426					19.45	0.0289428
ENSMUSP00000127593	VLSQQAAAVVKQEGGDNDLIER	K11(ICPL)	2445.24	0.850204	1;-;-		0	2.79187e-07	37.78	0.00492672
ENSMUSP00000127593	VLSQQAAAVVKQEGGDNDLIER	K11(ICPL:13C(6))	2451.26	0.817016	-;2;2		0	3.59395e-09	30.75	0.027724	49.97	0.000324232	42.32	0.00191667
ENSMUSP00000127526	IAEFAFEYAR		1216.6				0	1.97684e-07	38.64	0.00162076	38.78	0.00156934	57.7	2.01242e-05
ENSMUSP00000127526	MSDGLFLQKCR	K9(ICPL:13C(6)); C10(Carbamidomethyl)	1465.7	0.610166	1;1;2	10.8565	0	5.37734e-06	15.26	0.3604	51.57	8.35952e-05	43.6	0.000539097
ENSMUSP00000127526	SNVTAVHKANIMR	K8(ICPL)	1545.8	0.577534	2;-;2	4.59497	0	9.85725e-08	56.87	3.66976e-05	44.38	0.000647438	67.4	3.16628e-06
ENSMUSP00000127526	SNVTAVHKANIMR	K8(ICPL:13C(6))	1551.82	0.740347	-;1;-		0	4.87018e-09	48.37	0.00023069	47.5	0.000315645	67.34	3.1273e-06
ENSMUSP00000127526	MSDGLFLQKCR	K9(ICPL); C10(Carbamidomethyl)	1459.68				0	1.38315e-05			34.89	0.00314609	24.28	0.0362053
ENSMUSP00000127526	KTFDLYANVRPCVSIEGYKTPYTDVNIVTIR	K1(ICPL:13C(6)); C12(Carbamidomethyl); K19(ICPL:13C(6))	3854.96				3.6e-05	0.000658715					14.93	1.40758
ENSMUSP00000127503	VQEEAQCLVEELR	C7(Carbamidomethyl)	1602.78				0	2.12678e-06	45.41	0.000471893
ENSMUSP00000127503	SHMPYTDAMIHEVQR		1814.83				0	4.27986e-09	46.17	0.000262078	29.78	0.0112034	66.36	2.56639e-06
ENSMUSP00000127346	GNWGYLDQVAALR		1462.74				0	3.28142e-06	54.89	5.43269e-05	63.25	7.94894e-06	13.18	0.834256
ENSMUSP00000127346	ETLPAVLKNTAAR	K8(ICPL:13C(6))	1494.84	1.05675	2;2;1	17.4349	0	0.000102814	31.47	0.00816217	31.26	0.00856654	34.05	0.00488002
ENSMUSP00000127346	FAPPEDPEPWSGVR		1583.75				0.000272	0.00816376	16.44	0.322321	14.05	0.558841	15.56	0.379431
ENSMUSP00000127346	EMLGDFMFVIPALQVAHFQR		2349.19				0	2.06456e-06	18.74	0.488526	33.58	0.0150416	70.52	3.09617e-06
ENSMUSP00000127346	NGNPNSEGLPSWPVLDHDEQYLQLDTQPAVGR		3546.69				0	2.76366e-06	28.22	0.0503207	26.82	0.0669662	35.87	0.00851522
ENSMUSP00000127346	MMLPPECSHLLVEEYMGDTEDPETLQAQFR	C7(Carbamidomethyl)	3566.59				0	9.48563e-06	36.42	0.00221193	34.01	0.00391234	21.52	0.0782209
ENSMUSP00000127346	MMMKYWANFAR	K4(ICPL:13C(6))	1559.71				0.000133	0.0025173			34.24	0.00329616
ENSMUSP00000127346	WVQKNIAYFGGNR	K4(ICPL:13C(6))	1663.84	0.828028	-;2;1		0	7.93438e-07			49.97	0.000202393	40.47	0.00182178
ENSMUSP00000127346	GSFVHVKDTKSGVHAFLGIPFAKPPVGLLR	K7(ICPL); K10(ICPL); K23(ICPL)	3489.86				9.8e-05	0.00230894			12.69	1.32414	12.99	1.2433
ENSMUSP00000127346	GSFVHVKDTKSGVHAFLGIPFAKPPVGLLR	K7(ICPL:13C(6)); K10(ICPL:13C(6)); K23(ICPL:13C(6))	3507.92	0.962432	-;1;1		0	5.38162e-06			17.47	0.271277	14.6	0.530507
ENSMUSP00000127346	RLQFWTKTLPQKIQELKGSQDKHAEL	K7(ICPL); K12(ICPL); K17(ICPL); K22(ICPL)	3542.8	2.10987	-;1;-		0	4.15349e-05			16.57	0.929635	20.29	0.393338
ENSMUSP00000127346	LGVLGFFSTGDQHAR		1604.82				9.8e-05	0.00176589					22.84	0.118039
ENSMUSP00000127346	WVQKNIAYFGGNR	K4(ICPL)	1657.82	0.696666	-;-;1		0	1.01321e-08					55.76	5.13666e-05
ENSMUSP00000127346	EMLGDFMFVIPALQVAHFQR	M2(Oxidation)	2365.19				3.6e-05	0.000633748					14.61	1.14506
ENSMUSP00000127346	LQFWTKTLPQKIQELKGSQDKHAEL	K6(ICPL:13C(6)); K11(ICPL:13C(6)); K16(ICPL:13C(6)); K21(ICPL:13C(6))	3410.78				0	0.000110838					10.84	2.67845
ENSMUSP00000127276	LTVVDTPGYGDAINCR	C15(Carbamidomethyl)	1750.84				0	5.11236e-10	65.46	5.06314e-06	63.89	7.34975e-06	78.54	2.61723e-07
ENSMUSP00000127276	TMLITHMQDLQEVTQDLHYENFR		2862.35				0	3.389e-10	17.28	0.459252	42.85	0.00120621	15.91	0.600089
ENSMUSP00000127276	LLKASIPFSVVGSNQLIEAKGKKVR	K3(ICPL); K20(ICPL); K22(ICPL); K23(ICPL)	3102.69				0.000101	0.00109511	12.56	0.895721
ENSMUSP00000127276	LLKASIPFSVVGSNQLIEAKGKKVR	K3(ICPL:13C(6)); K20(ICPL:13C(6)); K22(ICPL:13C(6)); K23(ICPL:13C(6))	3126.78	0.886637	1;-;1	14.5655	0	8.75742e-05	27.04	0.0113676			17.32	0.100091
ENSMUSP00000127250	HYCIVANPVSR	C3(Carbamidomethyl)	1315.66				0.002139	0.0430386	22.86	0.0929104
ENSMUSP00000127250	VPHNAAVQVYDYR		1531.77				0	2.10129e-06	19.7	0.209482	20.41	0.168334	23.86	0.0760627
ENSMUSP00000127250	DAQSSVLFDVTGQVR		1621.82				0	3.79385e-06			49.97	0.000204911
ENSMUSP00000127250	IPPYHYIHVLDQNSNVSR		2152.09				0.000174	0.0030056			10.58	2.03871
ENSMUSP00000127250	VTGEEWLVR		1088.57				0	8.41499e-07					64.27	5.18143e-06
ENSMUSP00000127250	IEGEGSVLQAKLKAQALAIETEAELER	K11(ICPL:13C(6)); K13(ICPL:13C(6))	3118.64				0	1.21367e-06					35.64	0.00746375
ENSMUSP00000127198;ENSMUSP00000029490	ESLIDGIKR	K8(ICPL)	1135.61				3.6e-05	0.000278878	15.65	0.347144	15.87	0.346821	32.05	0.00820211
ENSMUSP00000127198	IILLAEGR		884.556				0.000358	0.00973027	40.43	0.000153975	35.64	0.000463926	34.47	0.000607364
ENSMUSP00000127198	RIILLAEGR		1040.66				0	0.000743008	27.75	0.00327367	32.39	0.00112469	25.74	0.00506703
ENSMUSP00000127198	EMYSASKPLKGAR	K7(ICPL); K10(ICPL)	1647.79	0.790647	3;2;3	6.71426	0	6.40854e-06	34.83	0.00529451	46.62	0.0003517	41.26	0.00121578
ENSMUSP00000127198	EMYSASKPLKGAR	K7(ICPL:13C(6)); K10(ICPL:13C(6))	1659.83	0.709046	-;-;2		0	3.92059e-05	26.95	0.0421839	26.85	0.0425468	38.73	0.00278653
ENSMUSP00000127198	MSDKLPYKVADIGLAAWGR	M1(Oxidation); K8(ICPL)	2212.12				0	5.00199e-10	92.55	1.65659e-08	54.59	0.000103566	64.41	1.10846e-05
ENSMUSP00000127198	KALDIAENEMPGLMR	K1(ICPL)	1792.87	0.599298	-;-;1		0	3.28996e-08					38.62	0.00298167
ENSMUSP00000127198	KALDIAENEMPGLMR	K1(ICPL:13C(6))	1798.89	0.622953	-;-;2		0	3.84838e-06					22.64	0.126869
ENSMUSP00000127198	MREMYSASKPLKGAR	K9(ICPL); K12(ICPL)	1934.94	0.732583	-;-;1		0.000272	0.00727734					10.94	1.5866
ENSMUSP00000127176;ENSMUSP00000066068;ENSMUSP00000067708	KTFTAWCNSHLR	K1(ICPL); C7(Carbamidomethyl)	1625.76				0	1.80802e-08	42.82	0.000726131	50.01	0.000124214	70.17	1.29337e-06
ENSMUSP00000127176;ENSMUSP00000066068;ENSMUSP00000067708	KTFTAWCNSHLR	K1(ICPL:13C(6)); C7(Carbamidomethyl)	1631.78				0	4.01722e-09	50.89	0.000140129	55.26	5.16773e-05	69.38	1.98394e-06
ENSMUSP00000127176;ENSMUSP00000066068;ENSMUSP00000067708	DLLLDPAWEKQQR	K10(ICPL)	1716.87				0	4.43511e-05	26.12	0.0459365			19.79	0.199938
ENSMUSP00000127176;ENSMUSP00000066068	LDHLAEKFR	K7(ICPL)	1233.64				0	0.000181242	32.72	0.00793828	33.45	0.00639376	27.5	0.0267631
ENSMUSP00000127176;ENSMUSP00000066068	LDHLAEKFR	K7(ICPL:13C(6))	1239.66				0	1.23858e-05	41.99	0.00102135	58.35	2.36142e-05	40.24	0.00150452
ENSMUSP00000127176;ENSMUSP00000066068	VGWEQLLTTIAR		1386.77				0	7.37632e-07	69.23	1.38503e-06	71.36	7.93286e-07	70.55	1.01761e-06
ENSMUSP00000127176;ENSMUSP00000066068	TINEVENQILTR		1429.77				0	3.74012e-08	37.36	0.00314048	58.78	2.21827e-05	47.54	0.000301298
ENSMUSP00000127176;ENSMUSP00000066068	LSNRPAFMPSEGR		1461.73				0	8.96945e-05	17.24	0.252991	30.54	0.0123631	25.7	0.0376815
ENSMUSP00000127176;ENSMUSP00000066068	LSNRPAFMPSEGR	M8(Oxidation)	1477.73				6.7e-05	0.00121751	27.49	0.0250424	28.42	0.0199274	17.45	0.249144
ENSMUSP00000127176;ENSMUSP00000066068	ELPPDQAEYCIAR	C10(Carbamidomethyl)	1561.73				0	6.73863e-06	50.88	8.32914e-05	46.74	0.000217132	53.97	4.14897e-05
ENSMUSP00000127176	ISIEMHGTLEDQLSHLR		1979				0	7.29379e-10	61	1.94213e-05	25.8	0.0647046	57.3	4.35728e-05
ENSMUSP00000127176	KDDPLTNLNTAFDVAER	K1(ICPL:13C(6))	2029.99				0	0.00012232	14.63	0.838492
ENSMUSP00000127176	QKASIHEAWTDGKEAMLR	K2(ICPL:13C(6)); K13(ICPL:13C(6))	2293.12	1.09736	1;1;-	12.5358	0	9.69727e-05	17.98	0.409198	20.68	0.219325
ENSMUSP00000127176	TEKLLETIDQLYLEYAKR	K3(ICPL); K17(ICPL)	2436.25	1.34143	-;1;-		0	8.9785e-08	24.1	0.117103	37.56	0.00531426	44.08	0.00118034
ENSMUSP00000127176	KQFGAQANVIGPWIQTKMEEIGR	K1(ICPL); K17(ICPL)	2811.42				0	1.94158e-07	12.45	1.70656			32.97	0.0150641
ENSMUSP00000127176	KQFGAQANVIGPWIQTKMEEIGR	K1(ICPL:13C(6)); K17(ICPL:13C(6))	2823.46	1.26342	1;-;1	25.3302	0	6.87028e-08	30.95	0.0213738			40.22	0.0025096
ENSMUSP00000127176	LHKPPKVQEKCQLEINFNTLQTKLR	K3(ICPL); K6(ICPL); K10(ICPL); C11(Carbamidomethyl); K23(ICPL)	3482.77				0	4.95008e-07	32.86	0.0195914
ENSMUSP00000127176	TEKLLETIDQLYLEYAKR	K3(ICPL:13C(6)); K17(ICPL:13C(6))	2448.29				0	2.92673e-06			18.15	0.405738
ENSMUSP00000127176	LHKPPKVQEKCQLEINFNTLQTKLR	K3(ICPL:13C(6)); K6(ICPL:13C(6)); K10(ICPL:13C(6)); C11(Carbamidomethyl); K23(ICPL:13C(6))	3506.86	0.774234	-;1;-		0	1.50617e-05			22.13	0.184011	36.41	0.00687965
ENSMUSP00000127176	DAKGISQEQMNEFR	K3(ICPL:13C(6))	1763.81	0.948869	-;-;1		0	2.66939e-08					46.7	0.000180658
ENSMUSP00000127176	ETADTDTADQVMASFKILAGDKNYITEDELR	K16(ICPL); K22(ICPL)	3670.69				0	4.63954e-05					10.31	2.37433
ENSMUSP00000127176	ETADTDTADQVMASFKILAGDKNYITEDELR	K16(ICPL:13C(6)); K22(ICPL:13C(6))	3682.72	1.13359	-;-;1		0	3.55102e-07					46.41	0.000693679
ENSMUSP00000127141	SSNTYTLTDVR		1256.61				0	0.000311048	32.23	0.0069715	30.38	0.0109946	38.13	0.00179195
ENSMUSP00000127141	SSNTYTLTDVRR		1412.71				0.000502	0.0078153	28.09	0.0294177	28.44	0.0272116	15.79	0.504857
ENSMUSP00000127141	SSTKKSVQYDDVPEYKDR	K4(ICPL:13C(6)); K5(ICPL:13C(6)); K16(ICPL:13C(6))	2478.17	0.897174	1;1;-	16.1953	0	1.1276e-06	17.05	0.37476	28.18	0.0298788
ENSMUSP00000127141	SSTKKSVQYDDVPEYKDR	K4(ICPL); K5(ICPL); K16(ICPL)	2460.11				9.3e-05	0.00114072			10.65	0.779199
ENSMUSP00000126849	SKGAVAIADAVR	K2(ICPL:13C(6))	1268.71				0	2.50847e-06	13.61	0.548745			36.31	0.00297032
ENSMUSP00000126849	VIAKALEKKSELKR	K4(ICPL:13C(6)); K8(ICPL:13C(6)); K9(ICPL:13C(6)); K13(ICPL:13C(6))	2057.18	0.714704	-;-;1		0	5.07397e-06					31.17	0.00481217
ENSMUSP00000126757	LLQAFLER		989.577				0.000133	0.00244219	12.33	0.380114	34	0.00272703
ENSMUSP00000126514	VKEKTVQQHAGETDPVTTMR	K2(ICPL); K4(ICPL)	2465.19	1.0952	1;-;1	1.35867	0	2.49496e-06	28	0.0335205	19.27	0.246073	22.44	0.12116
ENSMUSP00000126514	VKEKTVQQHAGETDPVTTMR	K2(ICPL:13C(6)); K4(ICPL:13C(6))	2477.23	1.07489	2;2;2	12.9493	0	5.33275e-08	29.34	0.0334104	30.18	0.0272949	42.13	0.00173908
ENSMUSP00000126514	VKEKTVQQHAGETDPVTTMR	K2(ICPL); K4(ICPL); M19(Oxidation)	2481.18	1.06148	-;1;1		0	1.09178e-05	24.01	0.0857934	38.47	0.00320024	34.06	0.00889341
ENSMUSP00000126514	VKEKTVQQHAGETDPVTTMR	K2(ICPL:13C(6)); K4(ICPL:13C(6)); M19(Oxidation)	2493.22	1.25531	1;-;-		0	2.36486e-06	24.46	0.0950746	23.71	0.112358	30.68	0.0226593
ENSMUSP00000126514	LPPDTKVYCGHEYTVNNLKFAR	K6(ICPL:13C(6)); C9(Carbamidomethyl); K19(ICPL:13C(6))	2844.4	1.25367	-;-;1		0	5.10714e-05					16.24	0.812879
ENSMUSP00000126448;ENSMUSP00000021652;ENSMUSP00000021649	GLAPEQPVTLR		1180.67				0	0.00016562			44.09	0.000380193	29.77	0.0102803
ENSMUSP00000126448;ENSMUSP00000021652;ENSMUSP00000021649	SCWDEPLSIAVR	C2(Carbamidomethyl)	1432.69				0	1.58777e-07	60.69	1.07491e-05	29.87	0.0126222	69.78	1.32547e-06
ENSMUSP00000126448;ENSMUSP00000021652	YRADSHGELDLAR		1502.73				0	9.40246e-06	31.5	0.0101944	33.1	0.00695486	39.68	0.00159855
ENSMUSP00000126448;ENSMUSP00000021649	HFLAPGVR		896.509				0.001649	0.0305432	18.85	0.121195			18.64	0.127199
ENSMUSP00000126448	DVQTPFVVELEVLDGHEPDGGQR		2536.24				0.000226	0.00304679	11.13	2.00049
ENSMUSP00000126448	TPALGGSFSGLEPMGLLWAMEPDRPFWR		3118.53				0	0.000210752			14.41	1.33487
ENSMUSP00000126448	NQVKMTKDGLKDVVDALQSPLVDKKSFIPVER	K4(ICPL); K7(ICPL); K24(ICPL); K25(ICPL)	4018.05				0.007351	0.153434			12.8	2.20419
ENSMUSP00000126448	NQVKMTKDGLKDVVDALQSPLVDKKSFIPVER	K4(ICPL:13C(6)); K7(ICPL:13C(6)); K24(ICPL:13C(6)); K25(ICPL:13C(6))	4042.17				0.000935	0.0259839					13.85	0.861284
ENSMUSP00000126197	SLNNQFASFIDKVR		1638.86				0	1.28328e-07	16.82	0.447135	45.63	0.000590818	68.68	2.79169e-06
ENSMUSP00000126174	GQIKQKKKTVPQKVTIAKIPR	K4(ICPL); K6(ICPL); K7(ICPL); K8(ICPL); K13(ICPL); K18(ICPL)	3019.64	1.03208	1;1;1	17.791	0	0.000116867	24.13	0.0581482	23.61	0.0635847	15.05	0.470475
ENSMUSP00000126174	GQIKQKKKTVPQKVTIAKIPR	K4(ICPL:13C(6)); K6(ICPL:13C(6)); K7(ICPL:13C(6)); K8(ICPL:13C(6)); K13(ICPL:13C(6)); K18(ICPL:13C(6))	3055.77				0	0.000793874	16.87	0.055509
ENSMUSP00000126011	GAVQFVTQYQHSSGQR		1792.87				0	7.02595e-08	70.8	1.67185e-06	66.61	4.24541e-06	63.38	9.3906e-06
ENSMUSP00000126011	HLLQAPVDDAQEILHSR		1942.01				0	4.04773e-11	33.78	0.00887842	29.92	0.0225618	54.44	7.7526e-05
ENSMUSP00000126011	MVVPVAALFTPLKERPDLPPIQYEPVLCSR	K13(ICPL:13C(6)); C28(Carbamidomethyl)	3546.9	1.31496	1;-;-		0.000146	0.0013862	11.14	1.89206
ENSMUSP00000126011	AVLNPLCQVDYR	C7(Carbamidomethyl)	1447.74				0	1.97688e-06			40.35	0.00137463	21.32	0.108103
ENSMUSP00000126011	FSETFSLYPQFMFHLR		2049.99				0.000462	0.00466411			13.74	0.851677
ENSMUSP00000126011	IMMFIGGPATQGPGMVVGDELKTPIR	K22(ICPL:13C(6))	2826.44	0.603671	-;1;-		0	1.98781e-06			25.23	0.125365
ENSMUSP00000126011	SWHDIEKDNAKYVKKGTKHFEALANR	K7(ICPL:13C(6)); K11(ICPL:13C(6)); K14(ICPL:13C(6)); K15(ICPL:13C(6)); K18(ICPL:13C(6))	3640.79	1.34824	-;-;1		0	2.61673e-05			13.62	1.53599	19.77	0.390123
ENSMUSP00000126011	FSWNVWPSSR		1265.61				0.006185	0.160044					11.39	0.668017
ENSMUSP00000126011	FLQPVQKIDMNLTDLLGELQR	K7(ICPL)	2576.36				0	2.19735e-06					18.73	0.338938
ENSMUSP00000126011	FLQPVQKIDMNLTDLLGELQR	K7(ICPL:13C(6))	2582.38	1.02115	-;-;1		0	1.35211e-09					28.48	0.030084
ENSMUSP00000125990	NKEPILSVLR	K2(ICPL)	1273.73	0.935978	1;1;-	6.45784	0.000133	0.00168578	24.85	0.0196404	18.99	0.0757097	20.92	0.0485458
ENSMUSP00000125990	NKEPILSVLR	K2(ICPL:13C(6))	1279.74	1.02093	-;-;1		0.000829	0.0229046					23.17	0.0250613
ENSMUSP00000125990	MVDMPANNKCLIFR	K9(ICPL); C10(Carbamidomethyl)	1813.85	1.15502	1;1;-	9.79618	0	1.37163e-07	19.94	0.124204	59	1.57366e-05
ENSMUSP00000125990	MVDMPANNKCLIFR	K9(ICPL:13C(6)); C10(Carbamidomethyl)	1819.87	1.21619	-;-;1		0	4.34877e-07	19.44	0.171213	40.7	0.00128096	48.91	0.000193436
ENSMUSP00000125990	VLEVASGSGQHAAHFAQAFPNAEWQPSDVDQR		3449.62				0	2.26422e-10	81.79	2.10585e-07	66.98	6.44438e-06	62.68	1.83703e-05
ENSMUSP00000125881	IAGKVPGLQNEQKR	K4(ICPL:13C(6)); K13(ICPL:13C(6))	1759.96				0	4.91674e-05			23.64	0.0620657
ENSMUSP00000125548	HEIVPKDIR	K6(ICPL:13C(6))	1217.67	1.93384	1;-;-		0.007304	0.142757	10.21	1.38155
ENSMUSP00000125548	CKDGVVFGVEKLVLSKLYEEGSNKR	C1(Carbamidomethyl); K2(ICPL); K11(ICPL); K16(ICPL); K24(ICPL)	3274.6	1.39891	1;-;-		0	1.60005e-05	23.9	0.161934
ENSMUSP00000125548	CKDGVVFGVEKLVLSKLYEEGSNKR	C1(Carbamidomethyl); K2(ICPL:13C(6)); K11(ICPL:13C(6)); K16(ICPL:13C(6)); K24(ICPL:13C(6))	3298.68				0	0.000121321	23.74	0.163995	25.19	0.115325
ENSMUSP00000125492	FSVDVFEETR		1228.58				0	3.96985e-07	57.02	2.62165e-05	70.52	1.17105e-06	46.88	0.000270753
ENSMUSP00000125492	DFLIPVAWYEDR		1523.75				0.000185	0.00164196	26.78	0.0377809	17.49	0.320828
ENSMUSP00000125492	MAELKYISGFGNECASEDPR	M1(Oxidation); C14(Carbamidomethyl)	2290.01				0	8.54274e-06	34.4	0.00270493	46.96	0.000153043	57.98	1.37726e-05
ENSMUSP00000125492	ILPSVSHKPFESIDQGHVTHNWDEVGPDPNQLR	K8(ICPL)	3853.87	0.998025	1;-;-		0	4.83456e-07	14.71	1.43339
ENSMUSP00000125492	ILPSVSHKPFESIDQGHVTHNWDEVGPDPNQLR	K8(ICPL:13C(6))	3859.88	1.17033	1;1;3	17.1142	0	0.000481978	16.61	0.897102	14.35	1.48566	15.89	1.07046
ENSMUSP00000125492	SWLYR		724.378				0.003684	0.0962892			19.17	0.13256	18.38	0.159006
ENSMUSP00000125492	WGVADKTFRPPYYHR	K6(ICPL:13C(6))	2004	1.12993	-;1;1		0	1.73043e-05			24.01	0.0869849	20.36	0.206181
ENSMUSP00000125492	CPGSLPKGQNNPQVCPYNLYAEQLSGSAFTCPR	C1(Carbamidomethyl); K7(ICPL:13C(6)); C15(Carbamidomethyl); C31(Carbamidomethyl)	3821.76	1.1082	-;1;2		0	3.24065e-11			66.97	5.00264e-06	87.04	4.92265e-08
ENSMUSP00000125492	CPGSLPKGQNNPQVCPYNLYAEQLSGSAFTCPR	C1(Carbamidomethyl); K7(ICPL); C15(Carbamidomethyl); C31(Carbamidomethyl)	3815.74				0	1.90905e-06					38.47	0.00279488
ENSMUSP00000125472	YPMEHGVVR		1087.53				6.7e-05	0.00130269			32.35	0.00587924	31.56	0.00785511
ENSMUSP00000125164	VTMWVFEEDIGGR	M3(Oxidation)	1554.72				0	0.000195472	14.37	0.372907	37.33	0.00184927
ENSMUSP00000125164	MAGKKVCIVGSGNWGSAIAKIVGSNAGR	M1(Oxidation); K5(ICPL); C7(Carbamidomethyl); K20(ICPL)	3014.51				0	8.60819e-05	35.69	0.00887556	16.07	0.810726	32.08	0.0214327
ENSMUSP00000125164	TGKSIEQLEKEMLNGQKLQGPQTAR	K3(ICPL); K10(ICPL); K17(ICPL)	3099.53	0.997348	-;1;1		0	1.54609e-09	38.94	0.00478026	37.88	0.00618318	52.26	0.000231477
ENSMUSP00000125164	TGKSIEQLEKEMLNGQKLQGPQTAR	K3(ICPL:13C(6)); K10(ICPL:13C(6)); K17(ICPL:13C(6))	3117.58	1.01659	2;-;-		0	4.22723e-09	28.32	0.0540339	32.72	0.0196452	48.63	0.000518879
ENSMUSP00000125164	ELHSILQHKGLVDKFPLFTAVYKVCYEGQPVGEFIR	K9(ICPL); K14(ICPL); K23(ICPL); C25(Carbamidomethyl)	4533.28	1.10225	1;-;-		0	9.74791e-07	50.95	0.000408191
ENSMUSP00000125164	ELHSILQHKGLVDKFPLFTAVYKVCYEGQPVGEFIR	K9(ICPL:13C(6)); K14(ICPL:13C(6)); K23(ICPL:13C(6)); C25(Carbamidomethyl)	4551.35	0.921598	-;1;1		0	8.36068e-06	38.62	0.00573663	26.13	0.104826	36.76	0.00787573
ENSMUSP00000124898	IQEQVQQTLAR		1313.72				0	1.96253e-06	57.6	2.55457e-05	51.79	9.73458e-05
ENSMUSP00000124898	AHYGHSEYQYAWR		1667.73				0	1.13128e-05	21.85	0.0316768	11.02	0.383479
ENSMUSP00000124898	MLTTAGQAAVGSGDAHGDR		1814.84				0	0.000235094	11.37	0.948295	30.27	0.0120754
ENSMUSP00000124695	MLIPYIEHWPR		1454.76				0.000262	0.00404352	18.64	0.294062	15.44	0.58152	12.61	1.11574
ENSMUSP00000124695	LNQVLEEEQKLVQLGQAEKR	K10(ICPL); K19(ICPL)	2562.33	0.797892	2;-;1	1.23015	0	8.76382e-08	32.02	0.0213226	19.54	0.395221	41.22	0.0026466
ENSMUSP00000124695	YTDQSGEEEEDYESEEQLQHR		2601.05				0	3.34689e-07	57.82	1.64805e-06	63.22	4.75302e-07	85.4	2.8772e-09
ENSMUSP00000124695	XTAAVSGVLGR	N-Term(ICPL); X1(G)	1092.58				0.003759	0.0982464					15.13	0.415852
ENSMUSP00000124695	LNQVLEEEQKLVQLGQAEKR	K10(ICPL:13C(6)); K19(ICPL:13C(6))	2574.37	0.740709	-;1;-		0	0.000139118			21.67	0.170873
ENSMUSP00000124695	KTDQFLR	K1(ICPL:13C(6))	1018.54	1.0989	-;-;1		6.7e-05	0.00157144					27.14	0.0310081
ENSMUSP00000124695	MLIPYIEHWPR	M1(Oxidation)	1470.75				0	0.000233353					16.88	0.419463
ENSMUSP00000124636	NDLVSATKTQIADAKR	K8(ICPL); K15(ICPL)	1940.98	1.05806	-;1;-		9.3e-05	0.000756381			13.52	1.00487
ENSMUSP00000124636	YIEKIQPSGGTNINEALLR	K4(ICPL:13C(6))	2227.18	0.821037	-;1;-		0	1.33302e-08			42.51	0.00121186
ENSMUSP00000124636	AKGKTAGWVR	K2(ICPL:13C(6)); K4(ICPL:13C(6))	1295.7				0	0.000171553					23.1	0.0555899
ENSMUSP00000124606	GLEALAANHAR		1122.6				0	0.000262683			32.96	0.00675276	31.46	0.00835961
ENSMUSP00000124516	DLDSLHSFVLR		1301.68				0	5.82856e-06	41.91	0.00101457	49.27	0.000203483	55.76	4.45974e-05
ENSMUSP00000124516	DGKKVDQYKGKR	K3(ICPL); K4(ICPL); K9(ICPL); K11(ICPL)	1841.87				0	8.54632e-06	30.9	0.012924	28.69	0.022512
ENSMUSP00000124516	DGKKVDQYKGKR	K3(ICPL:13C(6)); K4(ICPL:13C(6)); K9(ICPL:13C(6)); K11(ICPL:13C(6))	1865.95				0	3.40253e-07	10.19	2.00054	25.02	0.0657879
ENSMUSP00000124516	GYPTLKFFKPGQEAVKYQGPR	K6(ICPL); K9(ICPL); K16(ICPL)	2726.35	1.08095	1;-;-		0	1.26068e-07	24.45	0.126699	28.72	0.0471982
ENSMUSP00000124516	GYPTLKFFKPGQEAVKYQGPR	K6(ICPL:13C(6)); K9(ICPL:13C(6)); K16(ICPL:13C(6))	2744.41	0.995871	-;1;1		0	1.32711e-08			37.01	0.0068081	41	0.0026888
ENSMUSP00000124516	GYPTLLWFR		1152.62				3.6e-05	0.000430876					29.1	0.0167317
ENSMUSP00000124239	GTPHSHQPQHSDHDASHSGMLPR		2516.12				0	7.08992e-08	22.55	0.0530889	39.61	0.00101738	50.18	8.87446e-05
ENSMUSP00000124239	IPIHKFTTALKATGLQTSDPR	K5(ICPL); K11(ICPL)	2505.33				9.3e-05	0.00101293			12.23	1.56485
ENSMUSP00000124239	IPIHKFTTALKATGLQTSDPR	K5(ICPL:13C(6)); K11(ICPL:13C(6))	2517.37	1.14279	-;1;-		9.3e-05	0.000771347			19.57	0.181069
ENSMUSP00000124239	YYLGEAAAQGR		1198.58				0.001769	0.045147					13.62	0.432338
ENSMUSP00000124174	EHFAQFGHVR		1227.6				0	0.000495463	18.58	0.136595	23.01	0.0477533	20.35	0.0908733
ENSMUSP00000124174	CTVPFDKETGFHR	C1(Carbamidomethyl); K7(ICPL:13C(6))	1704.79	1.00898	1;1;1	20.9886	0	5.521e-05	19.55	0.109808	24.18	0.0387673	26.87	0.0208673
ENSMUSP00000124174	MAASAIKGLSALR	M1(Oxidation)	1304.73				0.007287	0.150199			15.58	0.336183
ENSMUSP00000124147	KMCLFAGFQR	K1(ICPL:13C(6)); C3(Carbamidomethyl)	1368.66	1.02936	1;-;4	20.1367	0	1.1458e-05	34.7	0.00394753	34.56	0.00407686	33.64	0.00510366
ENSMUSP00000124147	NFILDQTNVSAAAQR		1647.84				0	1.6399e-09	92.95	1.12045e-08	96.41	5.07403e-09	85.17	6.65954e-08
ENSMUSP00000124147	APQCLGKFIEIAAR	C4(Carbamidomethyl); K7(ICPL)	1678.87	0.947899	1;-;-		0	0.000570582	30.14	0.0192203	22.17	0.124381
ENSMUSP00000124147	APQCLGKFIEIAAR	C4(Carbamidomethyl); K7(ICPL:13C(6))	1684.89	1.1965	2;3;3	17.9531	0	4.96683e-08	49.06	0.000238397	39.7	0.00206803	40.58	0.0015531
ENSMUSP00000124147	HLYTKDIDIHEVR	K5(ICPL)	1743.88				0.000185	0.00265547	18.37	0.331845			12.91	1.17175
ENSMUSP00000124147	HLYTKDIDIHEVR	K5(ICPL:13C(6))	1749.9	0.91057	3;3;4	5.58649	0	4.52068e-07	51.96	0.0001471	51.94	0.00014586	64.79	7.8659e-06
ENSMUSP00000124147	GYFEYIEENKYSR	K10(ICPL)	1802.8	0.791414	-;1;1		0	0.000391892	17.91	0.0970848	33.35	0.00251998	48.73	7.97108e-05
ENSMUSP00000124147	GYFEYIEENKYSR	K10(ICPL:13C(6))	1808.82	0.895644	1;2;2	5.72186	0	0.000128035	34.31	0.00324346	26.9	0.0182736	37.2	0.00166728
ENSMUSP00000124147	KAVVVCPKDEDYKQR	K1(ICPL); C6(Carbamidomethyl); K8(ICPL); K13(ICPL)	2150.01	1.01547	2;-;1	27.3823	0	3.70739e-06	33.52	0.00780328	42.48	0.00102819	52.62	9.84629e-05
ENSMUSP00000124147	KAVVVCPKDEDYKQR	K1(ICPL:13C(6)); C6(Carbamidomethyl); K8(ICPL:13C(6)); K13(ICPL:13C(6))	2168.07	0.911862	1;2;3	10.1507	0	3.35777e-08	43.27	0.00121748	42.68	0.00141082	72.53	1.46319e-06
ENSMUSP00000124147	MSSSPVNVKKLKVSELKEELKKR	N-Term(ICPL); M1(Oxidation); K12(ICPL); K17(ICPL); K21(ICPL); K22(ICPL)	3198.64				0	0.000442036	13.02	2.05291	11.36	2.96111
ENSMUSP00000124147	KMCLFAGFQR	K1(ICPL); C3(Carbamidomethyl)	1362.64	0.870102	-;1;-		0	8.68415e-06			42.62	0.000686505	30.51	0.0111595
ENSMUSP00000124147	LSDKGLKADLMDR	K4(ICPL); K7(ICPL)	1671.81	0.605196	-;1;1		0	4.37732e-07			21.02	0.120183	45.15	0.000470458
ENSMUSP00000124147	LSDKGLKADLMDR	K4(ICPL:13C(6)); K7(ICPL:13C(6))	1683.86	1.47803	-;1;-		0	4.41368e-07			10.09	1.86593	41.56	0.00133013
ENSMUSP00000124147	RLSDKGLKADLMDR	K5(ICPL:13C(6)); K8(ICPL:13C(6))	1839.96				0	6.42122e-05			18.05	0.382287
ENSMUSP00000124147	LSASSLTMESFAFLWAGGR		2031				0	1.46548e-05			33.63	0.00747806
ENSMUSP00000124147	RKMCLFAGFQR	K2(ICPL:13C(6)); C4(Carbamidomethyl)	1524.77	1.03107	-;-;1		0.000775	0.020987					18.27	0.277021
ENSMUSP00000124073	SEKEMAAEAEALR	K3(ICPL:13C(6))	1545.73	0.695563	1;-;1	11.9701	0	1.21386e-06	41.86	0.000808019	63.43	5.96933e-06	47.49	0.000236165
ENSMUSP00000124073	KPVVPGHVLVCPLRPVER	K1(ICPL:13C(6)); C11(Carbamidomethyl)	2163.23	0.92463	1;1;1	18.5365	0	0.000674764	14.26	0.217484	26.15	0.0151663	16.12	0.152714
ENSMUSP00000124073	FRDLHPDEVADLFQVTQR		2186.1				0	1.43773e-10	25.83	0.065304	70.81	2.07463e-06	46.98	0.000519158
ENSMUSP00000123914	HITIFSPEGR		1156.61				0	0.000533957	36.9	0.00297073	39.88	0.00149576	41.51	0.00102769
ENSMUSP00000123799	LLEVQKR	K6(ICPL)	990.573	0.856286	1;-;-		0.001184	0.0200306	14.87	0.23949	21.5	0.0541579
ENSMUSP00000123799	LLEVQKR	K6(ICPL:13C(6))	996.593	0.972272	1;-;2	3.61542	3.6e-05	0.000486797	18.19	0.0743355			38.93	0.000908361
ENSMUSP00000123799	MASESGKLWGGR	M1(Oxidation)	1294.62				0.00436	0.0817892	19.12	0.138382
ENSMUSP00000123799	SRNDQVVTDLR		1302.68				3.6e-05	0.00062747	20.62	0.129177	20.04	0.156056	27.29	0.0278091
ENSMUSP00000123799	DVLFPGYTHLQR		1445.75				0	3.09532e-06	40.31	0.00213689	28.13	0.0368388
ENSMUSP00000123799	WSHWILSHAVALTR		1676.9				0	3.24922e-07	37.79	0.00249512	31.21	0.0116552	27.44	0.026865
ENSMUSP00000123799	HLWNVDVQGSKAYSR	K11(ICPL)	1864.91	0.627996	2;-;-		0	5.25427e-10	58.82	2.54567e-05
ENSMUSP00000123799	HLWNVDVQGSKAYSR	K11(ICPL:13C(6))	1870.93	0.852735	1;2;3	13.603	0	2.34968e-10	54.5	7.91234e-05	51.2	0.000168025	67.23	4.078e-06
ENSMUSP00000123799	LKELIGEAAGKLHTGR	K2(ICPL); K11(ICPL)	1903.02	0.975251	2;2;1	26.4663	0	2.32406e-08	54.49	6.98816e-05	58.22	2.80982e-05	39.14	0.00238922
ENSMUSP00000123799	LKELIGEAAGKLHTGR	K2(ICPL:13C(6)); K11(ICPL:13C(6))	1915.06	1.10066	1;2;4	9.38102	0	9.56309e-12	49.06	0.00016514	50.88	0.000106972	65.31	3.97497e-06
ENSMUSP00000123799	INVLPLGSGAIAGNPLGVDR		1933.09				0	7.84836e-16	114.72	3.84508e-11	78.77	1.55969e-07	95.39	3.29538e-09
ENSMUSP00000123799	AEAERDVLFPGYTHLQR		2002.01				0	2.69799e-06	44.71	0.000894181
ENSMUSP00000123799	AELNFGAITLNSMDATSER		2039.97				0	1.35975e-06	75.86	4.26743e-07	40.22	0.00155899	46.6	0.000359887
ENSMUSP00000123799	INVLPLGSGAIAGNPLGVDRELLR		2444.4				0.000226	0.00316795	17.59	0.0957994
ENSMUSP00000123799	FVGAVDPIMEKFNSSISYDR	K11(ICPL:13C(6))	2386.15	1.12574	-;2;2		0	2.00191e-09			64.82	7.77879e-06	28.05	0.0372103
ENSMUSP00000123799	RLKELIGEAAGKLHTGR	K3(ICPL); K12(ICPL)	2059.12	0.982176	-;-;1		0	9.93361e-08					41.38	0.00118628
ENSMUSP00000123799	RLKELIGEAAGKLHTGR	K3(ICPL:13C(6)); K12(ICPL:13C(6))	2071.16				0	1.36839e-09					53.03	4.38009e-05
ENSMUSP00000123799	ENMKQALSPDMLATDLAYYLVR	K4(ICPL)	2647.29				0.000247	0.00484507					14.8	0.965247
ENSMUSP00000123799	ENMKQALSPDMLATDLAYYLVR	K4(ICPL:13C(6))	2653.31	0.988356	-;-;1		0	0.000101667					24.23	0.114782
ENSMUSP00000123721	FLDDFEDCPSMYQR	C8(Carbamidomethyl)	1822.74				0	2.30136e-10	54.6	3.81411e-06	39.06	0.000130373	96.61	2.29187e-10
ENSMUSP00000123721	GQPNHKVMLDHSHGLAAFR	K6(ICPL:13C(6))	2226.11	1.05191	1;1;1	4.3145	0	5.73785e-08	15.02	0.843597	33.91	0.0106488	34.57	0.00919985
ENSMUSP00000123398;ENSMUSP00000102381	LLLNNDNLLR		1197.69				0	7.19208e-06	36.85	0.00130119	53.56	2.7755e-05	57.67	1.08586e-05
ENSMUSP00000123398	ICFKFDHLR	C2(Carbamidomethyl); K4(ICPL:13C(6))	1346.68	0.927421	-;1;-		0.003567	0.0654206			10.45	1.73102
ENSMUSP00000123398	IAAKFIIHAPPGEFNEVFNDVR	K4(ICPL:13C(6))	2595.34	0.887947	-;1;-		0	4.72909e-08			15.81	0.850247
ENSMUSP00000123393	LFHVQGTESHNTR		1525.75				3.6e-05	0.00029518	15.15	0.517809			35.21	0.00519744
ENSMUSP00000123336	MLLALR		716.449				0.006185	0.160251	14.09	0.274909			15.87	0.182469
ENSMUSP00000123336	FMAPDIEAAHR		1257.6				0	9.75662e-07	34.81	0.00355147	14.48	0.317242	41.98	0.000735289
ENSMUSP00000123336	SHSSGVGKPLSPER	K8(ICPL:13C(6))	1548.79	1.21791	1;-;-		0.000185	0.00188184	12.88	0.999544
ENSMUSP00000123336	SLLDSDHHPSEIAESHR		1929.91				0	1.17709e-07	20.94	0.115974	23.96	0.0604695	31.45	0.010778
ENSMUSP00000123336	LLLDQKVWEVAAPYIEKYR	K6(ICPL:13C(6)); K17(ICPL:13C(6))	2556.37	0.677085	-;-;1		0	5.95997e-08	14.96	0.70533			23.67	0.100082
ENSMUSP00000123336	LLLDQKVWEVAAPYIEKYR	K6(ICPL); K17(ICPL)	2544.33				0	5.3067e-05					10.18	2.65754
ENSMUSP00000123336	GETISGGNFHGEYPAKALDYLAIGVHELAAISER	K16(ICPL:13C(6))	3696.84	0.883838	-;-;1		0	1.82641e-07					19.92	0.464478
ENSMUSP00000123325	SEHLIQTDTVNLHR		1662.86				0	1.25839e-07	39.11	0.00264513	31.13	0.016613	50.68	0.000184267
ENSMUSP00000123325	ILATEDRSEHLIQTDTVNLHR		2461.28				0	1.11841e-05	16.63	0.618133
ENSMUSP00000123325	MAGKSSLFKIILLGDGGVGKSSLMNR	M1(Oxidation); K9(ICPL); K20(ICPL)	2905.5				0	2.37814e-09	28.61	0.0405588			55.83	7.66669e-05
ENSMUSP00000123089	GVGHEEKGAAPTGAIETTMKR	K7(ICPL:13C(6)); K20(ICPL:13C(6))	2362.16	1.12022	1;-;-		0	9.81169e-09	40.14	0.00254173
ENSMUSP00000123069	STDIVKAIAR	K6(ICPL)	1178.65	0.788455	1;1;1	12.9165	0	9.32169e-05	35.72	0.00330877	24.88	0.0320211	27.04	0.0194732
ENSMUSP00000123069	HFRPELEDR		1198.6				0	0.000242401	39.21	0.00138542	36.29	0.00267858	43.67	0.000545511
ENSMUSP00000123069	GEFYNEASNLQVAIR		1710.84				0	2.7584e-09	76.85	3.51115e-07	52	0.000102531	61.53	1.14249e-05
ENSMUSP00000123069	LIEFYKHESCGQCTPCR	K6(ICPL); C10(Carbamidomethyl); C13(Carbamidomethyl); C16(Carbamidomethyl)	2289.98	0.85605	1;-;1	8.52038	0	2.16145e-08	33.61	0.00163317			28.13	0.00607571
ENSMUSP00000123069	GAGAYICGEETALIESIEGKQGKPR	C7(Carbamidomethyl); K20(ICPL:13C(6)); K23(ICPL:13C(6))	2856.41	0.454003	-;-;1		0	4.23303e-07	22.08	0.195124	24.19	0.0969813	43.06	0.00156202
ENSMUSP00000123069	GGTWFAGFGR		1055.5				6.7e-05	0.00127776			14.66	0.273584	32.37	0.00417189
ENSMUSP00000123069	HDPHKLVEGCLVGGR	K5(ICPL:13C(6)); C10(Carbamidomethyl)	1784.9	1.03755	-;1;1		0	1.17699e-08			39.85	0.00216862	51.68	0.000141614
ENSMUSP00000123069	LIEFYKHESCGQCTPCR	K6(ICPL:13C(6)); C10(Carbamidomethyl); C13(Carbamidomethyl); C16(Carbamidomethyl)	2296.01	0.983946	-;2;1		0	9.54904e-09			38.16	0.000794334	12.91	0.245607
ENSMUSP00000123069	GAGAYICGEETALIESIEGKQGKPR	C7(Carbamidomethyl); K20(ICPL); K23(ICPL)	2844.37	0.746786	-;1;-		0	1.56677e-05			32.78	0.015316
ENSMUSP00000123069	LKPPFPADVGVFGCPTTVANVETVAVSPTICR	K2(ICPL:13C(6)); C14(Carbamidomethyl); C31(Carbamidomethyl)	3510.79	0.955306	-;1;-		0	9.69909e-06			20.34	0.399007
ENSMUSP00000123069	RGDWYKTKEILLKGPDWILGEMKTSGLR	K6(ICPL); K8(ICPL); K13(ICPL); K23(ICPL)	3710.85				0	0.000220113					15.04	1.49771
ENSMUSP00000123069	RGDWYKTKEILLKGPDWILGEMKTSGLR	K6(ICPL:13C(6)); K8(ICPL:13C(6)); K13(ICPL:13C(6)); K23(ICPL:13C(6))	3734.94	1.08298	-;-;1		0	2.53452e-06					34.39	0.0128644
ENSMUSP00000123005;ENSMUSP00000122155	LSSLEKSSPTPR	K6(ICPL)	1406.73				0	1.13035e-07	71.65	1.15923e-06	62.54	9.72289e-06	81.26	1.33174e-07
ENSMUSP00000123005;ENSMUSP00000122155	LSSLEKSSPTPR	K6(ICPL:13C(6))	1412.75				0	2.17472e-08	40.71	0.00154975	60.12	1.76067e-05	74.17	6.94827e-07
ENSMUSP00000123005;ENSMUSP00000122155	ITSLEVENQNLR		1415.75				0	9.21828e-10	87.2	3.36314e-08	89.65	1.91313e-08	82	1.11364e-07
ENSMUSP00000123005;ENSMUSP00000122155	FYEQMNGPVTSGSR		1572.71				0	9.45621e-11	61.73	3.42429e-06	78.06	7.97205e-08	66.77	1.19915e-06
ENSMUSP00000123005;ENSMUSP00000122155	RFYEQMNGPVTSGSR		1728.81				0	3.8442e-06	24.17	0.0507243	35.47	0.00349064	33.87	0.00504551
ENSMUSP00000123005;ENSMUSP00000122155	MATNFLAHEKIWFDKFKYDDAERR	M1(Oxidation); K15(ICPL); K17(ICPL)	3257.53				9.8e-05	0.00238067	18.96	0.297314			12.81	1.21475
ENSMUSP00000123005;ENSMUSP00000122155	GVVQDLQQAISKLEAR	K12(ICPL:13C(6))	1866.02				0	3.87562e-06			63.44	7.67661e-06	59.34	1.97319e-05
ENSMUSP00000123005	ARENIQKSLAGSSGPGASSGPGGDHSELIVR	K7(ICPL)	3139.55	1.26504	1;-;-		0	1.60391e-10	54.59	0.000139362
ENSMUSP00000123005	ARENIQKSLAGSSGPGASSGPGGDHSELIVR	K7(ICPL:13C(6))	3145.57	1.08485	2;3;4	12.6832	0	1.39112e-10	35.83	0.0103833	87.94	6.28314e-08	90.99	3.03735e-08
ENSMUSP00000123005	ENIQKSLAGSSGPGASSGPGGDHSELIVR	K5(ICPL:13C(6))	2918.43	0.935937	-;1;-		0	9.13462e-08			61.21	2.58458e-05
ENSMUSP00000122963	LQASSEGHEPQEDDDLAQR		2124.94				0	1.41179e-05			25.63	0.0253012	25.01	0.029026
ENSMUSP00000122945	KTRPDGNCFYR	K1(ICPL:13C(6)); C8(Carbamidomethyl)	1524.71	1.10691	1;1;1	20.0727	0	0.000100414	15.72	0.212994	12.52	0.433812	11.54	0.547135
ENSMUSP00000122945	IQQEIAVQNPLVSER		1723.93				0	1.43015e-07	24.25	0.0719729	55.56	5.55943e-05	66.29	4.69927e-06
ENSMUSP00000122851	MDLAGDSDGWVSLAELR		1834.87				0.003009	0.0526958	20.9	0.145903	11.93	1.17021
ENSMUSP00000122851	DSVSAAWHTYDTDRDGR		1951.85				0	0.000209789	19.22	0.0424843	22.26	0.0237717	15.72	0.107167
ENSMUSP00000122851	VHHGTPLSEAPHDDAHGNFQYDHEAFLGR		3254.48				0	4.33591e-11	45.36	0.0004075	23.42	0.057556	44.19	0.000499196
ENSMUSP00000122583	HMLHSLVR		992.546				0.000247	0.00333178	20.02	0.119449	21.31	0.088013	18.56	0.167875
ENSMUSP00000122527	QASGGPVDIGPEYQQDLDR		2044.96				0	4.64936e-13	71.62	1.03986e-06	73.99	5.88562e-07	125.66	4.06108e-12
ENSMUSP00000122155	QSSGPGASSGPGGDHSELIVR		1994.95				0	1.60118e-09	59.71	1.85481e-05	43.86	0.000713345	59.39	1.95061e-05
ENSMUSP00000121979	VISFEEQVASIR		1377.74				0.000185	0.00175645	34.65	0.00567281	18.18	0.27674	24.6	0.0563447
ENSMUSP00000121961	NIKTIAECLADELINAAK	K3(ICPL:13C(6)); C8(Carbamidomethyl)	2098.1				0	1.83908e-05	30.83	0.0186272
ENSMUSP00000121852	EFLPQGPVAMR		1244.64				3.6e-05	0.000656386					19.39	0.230735
ENSMUSP00000121852	VLDGQEAKAVGLISHVLEQNQEGDAAYR	K8(ICPL:13C(6))	3121.57				0	5.74913e-07					51.74	0.000282691
ENSMUSP00000121663	LTMQVSSLQR		1162.62				0	0.000104326	24.7	0.0538762	21.13	0.116406	36.61	0.00329592
ENSMUSP00000121663	SGVNSELVKR	K9(ICPL:13C(6))	1199.65	1.65784	-;1;-		0.000174	0.00274598			29.31	0.039796	32.71	0.0185386
ENSMUSP00000121643	QLLDQVEQIQKEQDYQR	K11(ICPL:13C(6))	2272.15				0.000935	0.025721	15.65	0.74602			21.08	0.220692
ENSMUSP00000121606	RKEEEVQQQKLAEER	K2(ICPL); K10(ICPL)	2110.03	1.17388	1;1;2	2.26694	0	7.03031e-08	42.26	0.00134607	39.28	0.00267343	36.78	0.00456519
ENSMUSP00000121606	RKEEEVQQQKLAEER	K2(ICPL:13C(6)); K10(ICPL:13C(6))	2122.07	1.89308	-;1;-		0	5.18098e-08	41.82	0.00178225	39.1	0.00335248	32.1	0.0163706
ENSMUSP00000121557	DSDSILETLQR		1276.64				0	0.000137103	35.06	0.00553603	33.02	0.0088552	30.14	0.0170417
ENSMUSP00000121557	VYEVATFYTMYNR		1656.77				0	1.26002e-07	75.86	3.93018e-07	64.76	5.06305e-06	44.42	0.000572835
ENSMUSP00000121557	KPVGKYHIQVCTTTPCMLR	K1(ICPL); K5(ICPL); C11(Carbamidomethyl); C16(Carbamidomethyl)	2499.21	0.949867	1;1;1	6.47136	0	2.15511e-10	62.14	1.44793e-05	46.79	0.000507822	42.3	0.00136906
ENSMUSP00000121557	KPVGKYHIQVCTTTPCMLR	K1(ICPL:13C(6)); K5(ICPL:13C(6)); C11(Carbamidomethyl); C16(Carbamidomethyl)	2511.25				0	2.25071e-10	33.64	0.0130835	39.52	0.00335059	40.7	0.00256193
ENSMUSP00000121557	IEAIVKNYPEGHQAAAVLPVLDLAQR	K6(ICPL)	2920.57	0.948051	1;-;-		0	0.000186934	23.04	0.140784
ENSMUSP00000121557	IEAIVKNYPEGHQAAAVLPVLDLAQR	K6(ICPL:13C(6))	2926.6	0.890037	1;1;1	1.81952	0	3.16726e-05	22.19	0.121696	28.72	0.0230956	24.83	0.0641261
ENSMUSP00000121557	DTPENNPDTPFDFTPENYKR	K19(ICPL:13C(6))	2508.11	0.87388	-;-;1		6.7e-05	0.0012261					14.8	0.250004
ENSMUSP00000121549	EASVTPSNLWGGQGLLGVSIR		2141.14				0	5.64632e-06	20.06	0.267282	35.6	0.0073951	65.5	7.4969e-06
ENSMUSP00000121370	KSLSDSESDDSKSKKKR	K1(ICPL:13C(6)); K12(ICPL:13C(6)); K14(ICPL:13C(6)); K15(ICPL:13C(6)); K16(ICPL:13C(6))	2480.2	0.782979	1;1;-	41.0113	0	1.48713e-08	50.63	0.000212782	15.32	0.734412
ENSMUSP00000121358	YREVQLPDR		1175.62				0.001288	0.023018	13	0.862042
ENSMUSP00000121358	AEQPHQHAMYYLR		1643.77				0	7.46182e-05	14.69	0.366795			18.06	0.170383
ENSMUSP00000121358	FYQEMLAVDAPR		1439.7				0	0.000183068			28.34	0.0183193
ENSMUSP00000121358	RHKVSVHVLAR	K3(ICPL:13C(6))	1412.83				3.6e-05	0.000310339					22.09	0.0299738
ENSMUSP00000121250	WMSLHHR		966.471				0.000674	0.0149402	17.45	0.192479	34.16	0.00410567	29.55	0.0118682
ENSMUSP00000121240	IQEYEKQLEKMR	K6(ICPL); K10(ICPL)	1804.87	0.884739	2;1;3	4.11324	0	6.18023e-07	35.48	0.00485584	80.69	1.46307e-07	63.62	7.38667e-06
ENSMUSP00000121240	IQEYEKQLEKMR	K6(ICPL:13C(6)); K10(ICPL:13C(6))	1816.91	0.893976	3;1;1	1.4312	0	3.05074e-06	67.93	3.70448e-06	64.26	8.62438e-06	56.7	4.91731e-05
ENSMUSP00000121240	IQEYEKQLEKMR	K6(ICPL); K10(ICPL); M11(Oxidation)	1820.86	1.00276	1;1;1	6.02648	0	1.73076e-05	21.73	0.0980286	30.55	0.0128633	46.68	0.000325396
ENSMUSP00000121240	IQEYEKQLEKMR	K6(ICPL:13C(6)); K10(ICPL:13C(6)); M11(Oxidation)	1832.9	0.944183	1;1;1	19.0254	0	1.03806e-06	47.89	0.000357621	52.29	0.000129549	55.23	6.64314e-05
ENSMUSP00000121240	LASLSEKPPAIDWAYYR	K7(ICPL)	2085.05	0.787837	1;-;-		0	7.38906e-09	45.36	0.000966358	26.76	0.0716934	41.78	0.00225673
ENSMUSP00000121240	LASLSEKPPAIDWAYYR	K7(ICPL:13C(6))	2091.06	0.91275	3;2;2	4.72874	0	6.41823e-07	67.31	5.6663e-06	70.79	2.58024e-06	69.04	3.75462e-06
ENSMUSP00000121240	KLALKTIDWVSFVEVMPQNQKAIGNALKSWNETFHAR	K1(ICPL); K5(ICPL); K21(ICPL); K28(ICPL)	4690.35	0.901036	1;-;1	2.06304	0	3.53136e-07	17.79	0.948977			35.92	0.0137908
ENSMUSP00000121240	KLALKTIDWVSFVEVMPQNQKAIGNALKSWNETFHAR	K1(ICPL:13C(6)); K5(ICPL:13C(6)); K21(ICPL:13C(6)); K28(ICPL:13C(6))	4714.41	0.934614	1;1;1	23.0968	0	5.33372e-05	19.84	0.493345	16.61	0.944031	29.8	0.0495292
ENSMUSP00000121201	QFVTATDVVR		1135.61				0	0.000121967			40.26	0.00120562	33.87	0.0052301
ENSMUSP00000121201	NWMNSLGVNPR		1287.63				0	3.77794e-05					28.28	0.0214718
ENSMUSP00000121108	NEKIAVHCTVR	K3(ICPL); C8(Carbamidomethyl)	1431.72				0	1.58747e-05	35.41	0.00614325			38.6	0.00275387
ENSMUSP00000121108	NEKIAVHCTVR	K3(ICPL:13C(6)); C8(Carbamidomethyl)	1437.73	1.11978	3;2;3	4.7035	0	3.51039e-06	51.37	0.000130208	46.07	0.000442439	50	0.0001865
ENSMUSP00000121108	RNEKIAVHCTVR	K4(ICPL); C9(Carbamidomethyl)	1587.82	1.14811	-;-;2		0	0.0001362	24.1	0.0608856	30.14	0.0147178	29.88	0.0155744
ENSMUSP00000121108	RNEKIAVHCTVR	K4(ICPL:13C(6)); C9(Carbamidomethyl)	1593.84	1.18532	5;5;3	3.03746	0	3.87135e-07	33.81	0.00625945	34.62	0.00505636	36.21	0.00325491
ENSMUSP00000121108	KLCLNICVGESGDR	K1(ICPL); C3(Carbamidomethyl); C7(Carbamidomethyl)	1725.8	0.849784	1;-;-		0	1.54997e-09	31.25	0.00783639	75.53	2.79898e-07	76.9	2.06216e-07
ENSMUSP00000121108	KLCLNICVGESGDR	K1(ICPL:13C(6)); C3(Carbamidomethyl); C7(Carbamidomethyl)	1731.82				0	7.29692e-05	19.74	0.142267	47.58	0.000252271	46.11	0.000412667
ENSMUSP00000121108	GAKAEEILEKGLKVR	K3(ICPL); K10(ICPL); K13(ICPL)	1956.03	1.18158	1;-;2	17.2945	0	1.74986e-08	33.6	0.0100835	61.2	1.60818e-05	44.79	0.000758379
ENSMUSP00000121108	GAKAEEILEKGLKVR	K3(ICPL:13C(6)); K10(ICPL:13C(6)); K13(ICPL:13C(6))	1974.09	1.10975	3;2;2	16.0627	0	3.30125e-11	67.46	2.39597e-06	94.22	5.09005e-09	55.52	3.81539e-05
ENSMUSP00000121108	KLCLNICVGESGDRLTR	K1(ICPL); C3(Carbamidomethyl); C7(Carbamidomethyl)	2096.04				0	0.000695622	37.49	0.00469657
ENSMUSP00000121108	KLCLNICVGESGDRLTR	K1(ICPL:13C(6)); C3(Carbamidomethyl); C7(Carbamidomethyl)	2102.06	1.09982	1;-;-		0	6.58667e-05	41.53	0.00179283
ENSMUSP00000121108	AAKVLEQLTGQTPVFSKAR	K3(ICPL); K17(ICPL)	2254.2	1.02379	1;1;1	2.66875	0	8.27136e-07	34.59	0.00847988	62.1	1.48291e-05	50.73	0.00020329
ENSMUSP00000121108	AAKVLEQLTGQTPVFSKAR	K3(ICPL:13C(6)); K17(ICPL:13C(6))	2266.24	1.02417	-;1;2		0	6.89039e-10	21.44	0.123102	73.34	7.64687e-07	43.05	0.000867038
ENSMUSP00000121046	LVGSGFSVVVGSR		1263.7				9.8e-05	0.0025165					30.27	0.00986709
ENSMUSP00000121019	IPDEIIDMVR		1200.63				0	4.0896e-07	39.02	0.00201756	60.2	1.53754e-05	46.18	0.000387995
ENSMUSP00000120871	KIAALWR	K1(ICPL:13C(6))	968.577	0.9157	-;-;1		0.009965	0.245238					11.58	0.344037
ENSMUSP00000120871	LKKKALVKR	K2(ICPL); K3(ICPL); K4(ICPL); K8(ICPL)	1503.86				0.000247	0.0047714			14.5	0.301591	14.73	0.331464
ENSMUSP00000120871	LKKKALVKR	K2(ICPL:13C(6)); K3(ICPL:13C(6)); K4(ICPL:13C(6)); K8(ICPL:13C(6))	1527.94	0.920584	-;1;1		0	2.15493e-07			16.91	0.0325927	27.39	0.00291823
ENSMUSP00000120871	ELILLGKPKRPR	K7(ICPL); K9(ICPL)	1629.96	0.790083	-;1;-		0.005442	0.102703			11.28	0.439392
ENSMUSP00000120871	RLKKKALVKR	K3(ICPL:13C(6)); K4(ICPL:13C(6)); K5(ICPL:13C(6)); K9(ICPL:13C(6))	1684.04	1.14726	-;1;-		0	0.000673242			13.29	0.0679779
ENSMUSP00000120871	FSTEQLPKFKAKHPDAKLSELVR	K8(ICPL:13C(6)); K10(ICPL:13C(6)); K12(ICPL:13C(6)); K17(ICPL:13C(6))	3113.66	0.91859	-;2;2		0	0.000146837			21.77	0.172306	21.52	0.216693
ENSMUSP00000120871	ELILLGKPKRPR	K7(ICPL:13C(6)); K9(ICPL:13C(6))	1642	0.907556	-;-;1		0.005153	0.136971					11.84	0.183298
ENSMUSP00000120859	VGIQHSLVNQPAR		1418.79				5e-05	0.000741874	18.94	0.15062	21.02	0.0944861
ENSMUSP00000120645	LKQQSELQSQVR	K2(ICPL)	1548.81	0.90819	3;2;-	10.4155	0	2.06968e-09	76.77	3.68161e-07	54.28	6.45723e-05	71.49	1.23467e-06
ENSMUSP00000120645	LKQQSELQSQVR	K2(ICPL:13C(6))	1554.83	0.778316	-;1;2		0	5.30675e-08	57.81	3.0549e-05	56.07	4.53561e-05	71.75	1.23309e-06
ENSMUSP00000120645	IKKTQDQISNIKYHEEFEKSR	K2(ICPL); K3(ICPL); K12(ICPL); K19(ICPL)	3041.45	0.766292	2;2;2	12.9328	0	4.63599e-07	41.11	0.00221883	40.22	0.00294687	44.81	0.00101093
ENSMUSP00000120645	IKKTQDQISNIKYHEEFEKSR	K2(ICPL:13C(6)); K3(ICPL:13C(6)); K12(ICPL:13C(6)); K19(ICPL:13C(6))	3065.53	0.810805	1;2;3	15.5759	0	2.17848e-09	37.28	0.00718342	47.09	0.000745581	47.15	0.000742097
ENSMUSP00000120633	FDGKTPATLGPNTR	K4(ICPL:13C(6))	1585.81	1.6035	-;-;2		0	1.67647e-05					28.31	0.0254559
ENSMUSP00000120461	LVDSPATPIWQLISKVLAR	K15(ICPL:13C(6))	2218.28				0	8.53707e-07	36.15	0.0013589			13.07	0.325495
ENSMUSP00000120452	TMLQNCLPR	C6(Carbamidomethyl)	1132.56				0.000708	0.0108049	21	0.102468	26.29	0.0303103	24.72	0.0453651
ENSMUSP00000120452	TPEELQHSLR		1209.62				0	1.04463e-06	33.18	0.00834256	51.03	0.000136867	51.89	0.000112279
ENSMUSP00000120452	KAQDFHWLTR	K1(ICPL)	1406.7	0.951988	2;1;1	9.33261	0	2.79552e-05	47.26	0.000359889	53.97	7.39599e-05	47.22	0.000366064
ENSMUSP00000120452	KAQDFHWLTR	K1(ICPL:13C(6))	1412.72	0.94709	3;4;4	5.7278	0	2.1988e-05	56.05	4.50689e-05	43.99	0.000746177	44.61	0.00062788
ENSMUSP00000120452	ALQSADVIVLFGAR		1459.83				0	3.31743e-07	52.26	4.90291e-05	42.29	0.000463308	54.44	2.96793e-05
ENSMUSP00000120452	DSFIVSEGANTMDIGR		1711.8				0	3.35983e-08	23.39	0.0574968	29.03	0.0156908	67.66	2.17673e-06
ENSMUSP00000120452	DSFIVSEGANTMDIGR	M12(Oxidation)	1727.79				0	4.23024e-09	22.38	0.0456696	35.9	0.00242902	79.85	9.78209e-08
ENSMUSP00000120452	NQEAMGAFQEFPQVEACR	C17(Carbamidomethyl)	2111.93				0	8.41837e-14	87.57	8.39926e-09	91.36	3.61914e-09	94.81	1.71792e-09
ENSMUSP00000120452	DAKQPLLIIGKGAAYSHAEDSIR	K3(ICPL); K11(ICPL)	2663.36	0.960409	3;2;2	7.21352	0	8.57475e-09	43.3	0.00158562	54.4	0.000123628	39.17	0.00427946
ENSMUSP00000120452	DAKQPLLIIGKGAAYSHAEDSIR	K3(ICPL:13C(6)); K11(ICPL:13C(6))	2675.4	1.07821	-;4;2		0	1.06098e-09	18.8	0.402068	31.51	0.0211895	49.74	0.000323817
ENSMUSP00000120452	EKMKSNEAISKELASQKSLPMNYYTVFYHVQEQLPR	K2(ICPL:13C(6)); K4(ICPL:13C(6)); K11(ICPL:13C(6)); K17(ICPL:13C(6))	4731.32	1.05601	1;1;2	23.7308	0	0.000171107	22.9	0.254123	14.11	1.98345	25.08	0.157712
ENSMUSP00000120452	LNWILHFGLPPR		1462.83				0	7.54525e-05			22.65	0.0641035	30.75	0.0100967
ENSMUSP00000120452	QALQDTSKPCLLNIMIEPQSTR	K8(ICPL); C10(Carbamidomethyl)	2648.32	1.14282	-;1;1		3.6e-05	0.000336336			11.27	2.38864	12.25	1.91803
ENSMUSP00000120452	QALQDTSKPCLLNIMIEPQSTR	K8(ICPL:13C(6)); C10(Carbamidomethyl)	2654.34				6.7e-05	0.000988635					14.33	1.20471
ENSMUSP00000120452	KLVEQCSLPFLPTPMGKGVVPDNHPNCVGAAR	K1(ICPL); C6(Carbamidomethyl); K17(ICPL); C27(Carbamidomethyl)	3698.83	1.26212	-;-;2		9.8e-05	0.00217459					21.35	0.298992
ENSMUSP00000120452	KLVEQCSLPFLPTPMGKGVVPDNHPNCVGAAR	K1(ICPL:13C(6)); C6(Carbamidomethyl); K17(ICPL:13C(6)); C27(Carbamidomethyl)	3710.85	1.39588	-;-;1		0	6.64862e-10					68.92	6.10389e-06
ENSMUSP00000119879	MGGTLPKYR	K7(ICPL:13C(6))	1133.59				6.7e-05	0.00154844			27.02	0.0255213	29.82	0.0125599
ENSMUSP00000119824	VEVTEFEDIKSGYR	K10(ICPL)	1776.84	0.321885	-;1;1		0	5.27527e-05			37.02	0.00219463	41.4	0.000775146
ENSMUSP00000119824	VEVTEFEDIKSGYR	K10(ICPL:13C(6))	1782.87	1.91841	-;1;1		0	7.2967e-06			15.78	0.409573	23.7	0.0656932
ENSMUSP00000119824	SELIAKIPNFWVTTFVNHPQVSALLGEEDEEALHYLTR	K6(ICPL:13C(6))	4478.26				0.000857	0.0125469			12.46	2.88313
ENSMUSP00000119824	QPFFQKR	K6(ICPL:13C(6))	1061.56	2.93272	-;-;1		0.000358	0.0107855					20.67	0.113129
ENSMUSP00000119794	GLFIIDDKGILR		1359.8				0	4.19797e-05	41.57	0.000376178
ENSMUSP00000119794	GLFIIDDKGILR	K8(ICPL)	1464.82	0.993201	2;1;1	1.62871	0	2.3353e-06	59.43	1.27138e-05	56.5	2.37304e-05	56.55	2.34588e-05
ENSMUSP00000119794	GLFIIDDKGILR	K8(ICPL:13C(6))	1470.84	0.961885	5;4;5	2.30382	0	4.13585e-07	65.15	3.69645e-06	59.93	1.22966e-05	67.11	2.38307e-06
ENSMUSP00000119794	TIAQDYGVLKADEGISFR	K10(ICPL)	2088.04	0.955043	2;-;2	0.515259	0	2.94984e-13	99.59	2.45078e-09	91.63	1.54247e-08	92.4	1.31776e-08
ENSMUSP00000119794	TIAQDYGVLKADEGISFR	K10(ICPL:13C(6))	2094.06	0.966788	5;4;7	3.40565	0	5.16896e-13	93.72	1.01272e-08	104.58	8.30784e-10	86.62	5.20473e-08
ENSMUSP00000119603	FDAGELITQR		1149.59				0	3.5908e-07	69.52	1.54686e-06	67.51	2.45725e-06	66.24	3.29192e-06
ENSMUSP00000119603	ILFRPVASQLPR		1396.84				0	1.20821e-05	32.92	0.00125074	35.89	0.000631199	34.02	0.00126809
ENSMUSP00000119603	IYTSIGEDYDER		1460.65				0	7.45482e-10	78.29	9.19161e-08	73.39	2.84048e-07	81.08	4.83495e-08
ENSMUSP00000119603	KLEAAEDIAYQLSR	K1(ICPL)	1711.87	1.10195	2;1;-	0.25109	0	8.15082e-08	73.57	8.13152e-07	60.31	1.61082e-05	63.93	6.99916e-06
ENSMUSP00000119603	KLEAAEDIAYQLSR	K1(ICPL:13C(6))	1717.89	0.983709	1;-;1	2.8832	0	4.9129e-10	87.98	4.08402e-08	60.15	2.47792e-05	75.13	7.87204e-07
ENSMUSP00000119603	VLPSITTEILKSVVAR	K11(ICPL)	1831.07	0.981004	2;-;-		0	9.26396e-10	80	4.05e-08	55.84	1.04246e-05	25.99	0.0103225
ENSMUSP00000119603	VLPSITTEILKSVVAR	K11(ICPL:13C(6))	1837.09	1.04825	-;2;2		0	7.35946e-08	63.77	6.71614e-07	67.49	2.67357e-07	52.54	8.35779e-06
ENSMUSP00000119603	SRNITYLPAGQSVLLQLPQ		2098.16				0	3.46202e-05	63.87	5.88643e-06
ENSMUSP00000119603	NVPVITGSKDLQNVNITLR	K9(ICPL)	2186.19	0.952775	2;-;1	1.21744	0	1.71219e-11	94.51	6.53125e-09	75.43	5.28441e-07	63.88	7.61225e-06
ENSMUSP00000119603	NVPVITGSKDLQNVNITLR	K9(ICPL:13C(6))	2192.21	1.05975	1;2;-	8.87837	0	6.21499e-13	91.81	1.02831e-08	84.98	5.03535e-08	44.87	0.000508305
ENSMUSP00000119603	GVQDIVVGEGTHFLIPWVQKPIIFDCR	K20(ICPL:13C(6)); C26(Carbamidomethyl)	3234.69	1.14863	2;1;2	7.92987	0	1.4974e-08	36.16	0.0084736	23.14	0.169851	36.02	0.00875121
ENSMUSP00000119603	MAAKVFESIGKFGLALAVAGGVVNSALYNVDAGHR	M1(Oxidation); K11(ICPL)	3653.89				0	1.89143e-07	45.95	0.00116631	49.6	0.000451749
ENSMUSP00000119603	AATFGLILDDVSLTHLTFGKEFTEAVEAKQVAQQEAER	K20(ICPL:13C(6)); K29(ICPL:13C(6))	4385.22	1.02158	1;-;1	1.93368	0	0.000495929	14.89	1.70765			14.28	2.03981
ENSMUSP00000119603	GVQDIVVGEGTHFLIPWVQKPIIFDCR	K20(ICPL); C26(Carbamidomethyl)	3228.67				0.000708	0.0103362			17.11	0.659477
ENSMUSP00000119603	AATFGLILDDVSLTHLTFGKEFTEAVEAKQVAQQEAER	K20(ICPL); K29(ICPL)	4373.19	1.24893	-;1;-		0	0.000173983			14.57	1.83997	10.56	4.77309
ENSMUSP00000119543	SITHSPKVQALVR	K7(ICPL:13C(6))	1546.88	1.19815	-;1;2		0	1.12379e-05			23.95	0.0362445	53.82	3.85907e-05
ENSMUSP00000119543	IGEIVAEMDVPLHCR	C14(Carbamidomethyl)	1738.86				0	6.96204e-06			27.27	0.0334687	40.85	0.00146359
ENSMUSP00000119535	KGWLSLHTGNLDGEDHAAER	K1(ICPL)	2311.08	0.810337	-;-;1		0	1.24811e-08	48.37	0.000256889			28.55	0.023459
ENSMUSP00000119535	KGWLSLHTGNLDGEDHAAER	K1(ICPL:13C(6))	2317.1				0	8.39417e-08	28.88	0.0287311	39.02	0.00276944	15.33	0.659451
ENSMUSP00000119535	VAKGNKPVSYEEAHAPHYIAHR	K3(ICPL:13C(6)); K6(ICPL:13C(6))	2696.35	1.04127	1;-;1	21.0694	0	5.67436e-06	10.41	2.97997			17.95	0.521856
ENSMUSP00000119535	VAKGNKPVSYEEAHAPHYIAHR	K3(ICPL); K6(ICPL)	2684.29				0.00371	0.0966392					14.33	0.929824
ENSMUSP00000119503	NVQGVNYVSPVR		1331.71				0	4.38702e-06					46.73	0.000317425
ENSMUSP00000119474	LDAAGGLQSLR		1100.61				0	1.74517e-07	55.64	3.75234e-05	54.57	4.80068e-05	60.93	1.10995e-05
ENSMUSP00000119474	GALWGSEDISR		1190.58				0	1.39053e-05	23.04	0.080448	20.92	0.127028	37.65	0.00269712
ENSMUSP00000119474	VTMATHPDGFR		1231.59				0	4.08055e-05	28.98	0.0161254	11.84	0.772471	49.67	0.000138645
ENSMUSP00000119474	LEGPLAAAHSSGPR		1362.71				0	2.8952e-06	45.46	0.000467914	13.89	0.667602	29.55	0.018135
ENSMUSP00000119474	NSNTMAAAALAAPSLGFDR		1877.92				0	1.59473e-05	22.08	0.122649	21.38	0.143009	31.1	0.0150592
ENSMUSP00000119474	NSNTMAAAALAAPSLGFDR	M5(Oxidation)	1893.92				0	7.80462e-05	29.1	0.0180234			42.62	0.000828729
ENSMUSP00000119474	MAGSVPPALQLQDLTALEER		2139.11				0	7.89362e-10	61.99	1.81502e-05	74.79	9.47559e-07	73.88	1.16435e-06
ENSMUSP00000119474	VTMATHPDGFRLEGPLAAAHSSGPR		2575.29				0	2.91455e-08	28.53	0.0434171	24.59	0.111559	47.37	0.000585424
ENSMUSP00000119474	HPDLVVEVAHPKIIHESGAQILR	K12(ICPL:13C(6))	2669.46	0.991431	1;1;1	32.4241	0	2.24002e-06	26.5	0.0299989	17.2	0.282961	20.55	0.132157
ENSMUSP00000119474	GLCPLAPR	C3(Carbamidomethyl)	883.481				0.006439	0.131083			25.36	0.0471536
ENSMUSP00000119139	KVDIIADAAYSIFKR	K1(ICPL:13C(6)); K14(ICPL:13C(6))	1932.04	1.03045	-;1;-		0.000495	0.0050185			11.88	0.846468
ENSMUSP00000119139	KVDIIADAAYSIFKR	K1(ICPL); K14(ICPL)	1920	1.17814	-;-;1		0	3.15218e-05					14.77	0.748542
ENSMUSP00000119080	HLSHPEPEQQHVIQR		1834.93				0.000185	0.00193376	22.38	0.143946
ENSMUSP00000118973	QASQGMVGQLAAR		1316.67				0	0.000260334	22.31	0.105161
ENSMUSP00000118973	GLGLDDALEPR		1155.6				3.6e-05	0.000498202					27.48	0.0187581
ENSMUSP00000118963	DLLHPSLEEEKKKHKKKR	K11(ICPL); K12(ICPL); K13(ICPL); K15(ICPL); K16(ICPL); K17(ICPL)	2873.43	1.04123	-;-;1		0	2.26806e-09					52.7	0.000179906
ENSMUSP00000118906	ILEGSGATEFHCSAR	C12(Carbamidomethyl)	1634.76				0	1.63816e-07	26.61	0.0178984	78.78	1.09258e-07
ENSMUSP00000118845	XDIGKWLPNGTLKIIDR	X1(N); K5(ICPL)	2058.12				0.006036	0.118619			15.07	0.522768
ENSMUSP00000118737	IALGGVCDQSDIR	C7(Carbamidomethyl)	1403.69				0	1.17084e-07	50.79	0.000139225	30.43	0.0154427	47.94	0.000264342
ENSMUSP00000118737	AVAVKVAEGQHKEAKLDR	K5(ICPL); K12(ICPL); K15(ICPL)	2264.15	0.949697	1;-;-		0	5.97095e-06	20.54	0.22077	18.15	0.392724	11.43	1.80582
ENSMUSP00000118737	AVAVKVAEGQHKEAKLDR	K5(ICPL:13C(6)); K12(ICPL:13C(6)); K15(ICPL:13C(6))	2282.21	0.734798	-;1;-		0	1.48369e-05	10.17	1.88476	20.52	0.196505
ENSMUSP00000118737	EALPDILTSIIR		1340.78				0	0.000395413			15.05	0.289162
ENSMUSP00000118737	EELGELSEQFYR		1499.7				6.7e-05	0.00143019			26.05	0.0291768	33.25	0.00560684
ENSMUSP00000118737	TSSMPEQAHKVCVKEIKR	K10(ICPL:13C(6)); C12(Carbamidomethyl); K14(ICPL:13C(6)); K17(ICPL:13C(6))	2461.22	1.51708	-;1;-		0	1.90999e-05			14.47	1.1522
ENSMUSP00000118737	ILLDNDHYAMEKLKR	K12(ICPL:13C(6)); K14(ICPL:13C(6))	2081.07	0.926958	-;-;1		9.8e-05	0.00210565					13.68	1.03709
ENSMUSP00000118555	YHQIGSGKCEIKVAQPKEVYR	K8(ICPL); C9(Carbamidomethyl); K12(ICPL); K17(ICPL)	2805.35	0.848499	1;-;1	16.8713	0	7.06685e-07	17.34	0.548892	17.78	0.49684	23.07	0.146966
ENSMUSP00000118555	YHQIGSGKCEIKVAQPKEVYR	K8(ICPL:13C(6)); C9(Carbamidomethyl); K12(ICPL:13C(6)); K17(ICPL:13C(6))	2823.41	1.09083	-;1;1		0	1.34439e-10			32.03	0.0205843	42.77	0.00171745
ENSMUSP00000118531	GKGYYDTYLKR	K2(ICPL); K10(ICPL)	1573.74	1.10033	-;-;1		6.7e-05	0.000998472	13.51	0.503592			21.46	0.087883
ENSMUSP00000118531	GKGYYDTYLKR	K2(ICPL:13C(6)); K10(ICPL:13C(6))	1585.78	0.976013	2;1;1	22.2549	3.6e-05	0.000622219	20.82	0.125847	29.64	0.0152643	28.69	0.0198079
ENSMUSP00000118470	AQLPAHAPLAAHPR		1449.81				0.000495	0.00565073	10.93	0.887959	21.23	0.080609
ENSMUSP00000118462	GGGKFSTANPVYVGNVAWAHILAAR	K4(ICPL:13C(6))	2667.39	1.3315	2;3;1	11.5223	0	1.60654e-09	41.09	0.00213182	35.45	0.00781179	51.21	0.0002104
ENSMUSP00000118462	SQFLSNTIIKALKNKFILR	K10(ICPL); K13(ICPL); K15(ICPL)	2549.4	0.976536	-;1;2		0	6.97603e-08			24.02	0.0560733	30.8	0.0123517
ENSMUSP00000118462	SQFLSNTIIKALKNKFILR	K10(ICPL:13C(6)); K13(ICPL:13C(6)); K15(ICPL:13C(6))	2567.47				0	0.00012515					10.68	0.491663
ENSMUSP00000118462	GGGKFSTANPVYVGNVAWAHILAAR	K4(ICPL)	2661.37	0.812598	-;-;1		0	1.14129e-07					30.18	0.02883
ENSMUSP00000118449	QGAALGIPYFTACR	C13(Carbamidomethyl)	1524.76				0	5.813e-05	24.12	0.0712554	10.97	1.4717	28.26	0.0266464
ENSMUSP00000118449	KPALPYTPGSDVAGIIESVGDKVSAFKKGDR	K1(ICPL); K22(ICPL); K27(ICPL); K28(ICPL)	3622.8	0.89078	1;1;-	7.11327	0	5.05643e-08	43.45	0.00199494	49.24	0.000551545	59.01	5.74006e-05
ENSMUSP00000118449	KPALPYTPGSDVAGIIESVGDKVSAFKKGDR	K1(ICPL:13C(6)); K22(ICPL:13C(6)); K27(ICPL:13C(6)); K28(ICPL:13C(6))	3646.88	1.01706	2;-;2	9.02967	0	1.47276e-11	60.46	3.39111e-05	43.07	0.00209106	63.5	1.80237e-05
ENSMUSP00000118449	AGESVLVHGASGGVGLATCQIAR	C19(Carbamidomethyl)	2210.13				0	2.76098e-09					80.66	2.57275e-07
ENSMUSP00000118252	TPLHLSIMAR		1138.64				0.000919	0.0146905	20.71	0.0904377	20.17	0.102412
ENSMUSP00000118179	GHYNNVSCAVFHPR	C8(Carbamidomethyl)	1657.76				0	4.24028e-05	33.64	0.00406563	41.65	0.000612101
ENSMUSP00000118179	KKLPKETLDQQKR	K1(ICPL); K2(ICPL); K5(ICPL); K12(ICPL)	2032.04	1.10431	1;-;-		0	0.000233136	16.56	0.537649
ENSMUSP00000118127	VPNPHPHPHFTR		1435.74				0	2.37881e-06	28.7	0.0229998	24.66	0.0540328	34.01	0.00623591
ENSMUSP00000118121	MVEADRPGKLFIGGLNTETNEKALEAVFGKYGR	M1(Oxidation); K22(ICPL); K30(ICPL)	3836.91				0	1.04741e-05	34.19	0.0176052			27.02	0.0897715
ENSMUSP00000118121	GFAFVTFESPADAKDAAR	K14(ICPL:13C(6))	2010.97	1.19442	-;1;-		0	4.31514e-07			41.81	0.00134142
ENSMUSP00000117924	LSLQDSVATLALSHVTPHDER		2289.18				0	8.56038e-05			21.69	0.184657
ENSMUSP00000117855	SEVDMLKIR	K7(ICPL:13C(6))	1201.63	0.852915	-;1;-		0	0.000627689			19.12	0.171446
ENSMUSP00000117855	KLMVALAKGR	K1(ICPL:13C(6)); K8(ICPL:13C(6))	1308.76	0.895686	2;-;1	5.39725	0.000272	0.00659758	20.08	0.0461422			27.85	0.00771077
ENSMUSP00000117855	SVCHLQKVFER	C3(Carbamidomethyl); K7(ICPL:13C(6))	1513.77	1.17946	1;1;-	13.9241	0	0.000694894	25.43	0.0465429	20.64	0.141097
ENSMUSP00000117855	ELYDAGVKR	K8(ICPL:13C(6))	1161.6	0.789635	-;1;1		0.000462	0.00439002			26.89	0.02732	27.04	0.0264914
ENSMUSP00000117855	KLMVALAKGR	K1(ICPL); K8(ICPL)	1296.73	0.842521	-;-;1		0	1.35328e-05					15.9	0.239047
ENSMUSP00000117855	KGTDVPKWISIMTER	K1(ICPL:13C(6)); K7(ICPL:13C(6))	1983.02	0.822831	-;-;1		6.7e-05	0.00127963					13.6	1.05637
ENSMUSP00000117855	RAEDGSVIDYELIDQDAR		2064.98				0	5.63746e-05					15.75	0.468288
ENSMUSP00000117821	TVMVQEGNVEGAYR		1552.74				0	4.12116e-07	63.65	6.34333e-06
ENSMUSP00000117821	ILTTDGLTEVISR		1417.79				6.7e-05	0.00107016					21.95	0.0842508
ENSMUSP00000117806	GGTLMTVTGDVEPR		1432.71				0	0.000271814	24.52	0.0595114	20.58	0.14131
ENSMUSP00000117800	MKVFVTGPLPAEGR	K2(ICPL:13C(6))	1612.86				0	0.000581477	30.36	0.0179488
ENSMUSP00000117800	MKVFVTGPLPAEGR	N-Term(ICPL); K2(ICPL)	1711.87				0	4.32876e-07	40.28	0.00170168	58.24	2.59445e-05	37.27	0.00340312
ENSMUSP00000117800	MKVFVTGPLPAEGR	N-Term(ICPL:13C(6)); K2(ICPL:13C(6))	1723.91	19.7125	-;1;-		0	1.17968e-05	43.94	0.000787109	61.61	1.47711e-05	64.45	7.10665e-06
ENSMUSP00000117547	WGFKGQPASHGQTKTHR	K4(ICPL:13C(6)); K14(ICPL:13C(6))	2145.05	0.918755	1;1;1	19.6443	0	9.76403e-07	14.97	0.827891	25.89	0.0673708	30.67	0.0223258
ENSMUSP00000117547	RPGAISTGDIAR		1213.66				0	2.98615e-08			22.87	0.0611953	53.22	5.64571e-05
ENSMUSP00000117497	TRPKEGWKGPR	K4(ICPL); K8(ICPL)	1521.77	0.686546	1;-;-		0	0.000146005	32.4	0.0126021			21.7	0.151781
ENSMUSP00000117497	TRPKEGWKGPR	K4(ICPL:13C(6)); K8(ICPL:13C(6))	1533.81	0.909602	2;2;2	3.38365	0	5.38328e-08	43.56	0.000720307	44.23	0.000619218	42.35	0.000954649
ENSMUSP00000117497	GFGFVKFKDPNCVGTVLASRPHTLDGR	K6(ICPL); K8(ICPL); C12(Carbamidomethyl)	3185.58				0	2.00963e-05					13.7	1.79803
ENSMUSP00000117497	GFGFVKFKDPNCVGTVLASRPHTLDGR	K6(ICPL:13C(6)); K8(ICPL:13C(6)); C12(Carbamidomethyl)	3197.62	2.22625	-;-;1		0	6.17318e-05					21.41	0.282603
ENSMUSP00000117398	SSDLGGLWR		990.5				0.000693	0.0151146			36.13	0.00327886	19.83	0.138309
ENSMUSP00000117398	ASLYKSVVSNSSR	K5(ICPL:13C(6))	1508.78				0	7.0193e-06					58.88	2.22602e-05
ENSMUSP00000117398	TQLREPVLNDELPGR		1736.93				3.6e-05	0.000496176					20.83	0.181728
ENSMUSP00000117347	IGKLIENKMSDSKKEELQKSLNILTAFR	K3(ICPL); K8(ICPL); K13(ICPL); K14(ICPL); K19(ICPL)	3758.91	0.940508	-;1;1		0	1.11875e-07			11.54	3.3249	32.92	0.0247595
ENSMUSP00000117347	KKEAEKEEL	K1(ICPL); K2(ICPL); K6(ICPL)	1418.66	1.0122	-;-;1		0.000247	0.0054779					16.63	0.174902
ENSMUSP00000117347	DGDLENPVLYNGAVKVGAIQR	K15(ICPL:13C(6))	2339.21	1.19606	-;-;1		0	3.60961e-05					18.2	0.420013
ENSMUSP00000117347	IGKLIENKMSDSKKEELQKSLNILTAFR	K3(ICPL:13C(6)); K8(ICPL:13C(6)); K13(ICPL:13C(6)); K14(ICPL:13C(6)); K19(ICPL:13C(6))	3789.01				0.000247	0.00398458					13.27	1.35406
ENSMUSP00000117181	WGPNHAADPIITR		1447.74				0	0.000313552			24.57	0.0527202
ENSMUSP00000117009	ILMAHDIHTKHR	K10(ICPL)	1576.81	1.1605	1;-;1	27.0965	0	0.000506383	22.63	0.10424	10.25	1.59074	23.82	0.0715796
ENSMUSP00000117009	ILMAHDIHTKHR	K10(ICPL:13C(6))	1582.83	1.24565	3;4;4	17.4509	0	1.60408e-06	39.79	0.00181046	29.11	0.0197004	39.3	0.00192683
ENSMUSP00000117009	ILMAHDIHTKHR	M3(Oxidation); K10(ICPL:13C(6))	1598.83	1.18168	1;1;1	10.9016	5.1e-05	0.000851682	22.3	0.100103	14.7	0.574341	21.11	0.131271
ENSMUSP00000117009	VLDKILIENPKQWLTFK	K4(ICPL); K11(ICPL); K17(ICPL)	2400.27	1.12486	1;1;-	5.85914	0	9.80849e-06	26.58	0.0601115	25.38	0.080691	29.28	0.033285
ENSMUSP00000117009	VLDKILIENPKQWLTFK	K4(ICPL:13C(6)); K11(ICPL:13C(6)); K17(ICPL:13C(6))	2418.34	0.928433	-;-;1		0	3.5252e-05	19.54	0.126737	24.66	0.0393276	31.43	0.00834561
ENSMUSP00000117009	KILEATAHAQAQLGCPVIIHPGR	K1(ICPL:13C(6)); C15(Carbamidomethyl)	2591.4	1.74484	2;1;1	7.69246	0	1.64429e-11	31.18	0.0145176	32.82	0.00992553	52.06	0.000118548
ENSMUSP00000117009	DVHTLKWLAEQTGVHIIAGAGFYVDATHSAATR	K6(ICPL:13C(6))	3646.87				0	0.000210951	22.7	0.233072	20.32	0.396669
ENSMUSP00000117009	ILQEAGADISKTVMSHLDR	K11(ICPL:13C(6))	2195.12	1.00152	-;-;1		0	3.10941e-06			12.91	1.32526	24.41	0.0934587
ENSMUSP00000117009	NPGAPFQIIR		1112.62				0.000247	0.00562836					23.44	0.0477807
ENSMUSP00000117009	VHFLVDEGYEDR		1478.69				0	3.00638e-05					16.29	0.271383
ENSMUSP00000116919	EHINLGCDVDFDIAGPSIR	C7(Carbamidomethyl)	2128.01				0	2.53547e-12	77.43	3.12641e-07	120.27	1.51295e-11	101.66	1.13609e-09
ENSMUSP00000116919	GLKLTFDSSFSPNTGKKNAKIKTGYKR	K3(ICPL); K16(ICPL); K17(ICPL); K20(ICPL); K22(ICPL); K26(ICPL)	3616.79				0	8.835e-05	13.08	2.2806
ENSMUSP00000116919	GLKLTFDSSFSPNTGKKNAKIKTGYKR	K3(ICPL:13C(6)); K16(ICPL:13C(6)); K17(ICPL:13C(6)); K20(ICPL:13C(6)); K22(ICPL:13C(6)); K26(ICPL:13C(6))	3652.89	0.577367	1;-;-		0	4.6376e-05	14.3	1.41183
ENSMUSP00000116914	GLKYIHSADIIHR	K3(ICPL:13C(6))	1633.89	0.994085	-;1;1		0	6.43937e-05			15.38	0.511381	29.83	0.0183546
ENSMUSP00000116868	NNLIDDAKAR	K8(ICPL:13C(6))	1240.64	0.414029	1;1;-	35.1367	0	0.000163119	10.85	1.50882	25.74	0.0488035
ENSMUSP00000116627	HLETAGILGANIR		1364.76				0	2.45523e-08	55.59	2.62255e-05	30.48	0.00819259	54.38	3.46516e-05
ENSMUSP00000116627	IQDAGLVLADALR		1354.77				0	4.91316e-05			47.1	0.000152088
ENSMUSP00000116627	KFLFDLNVDDGLAALGYSKDDIPSLVKGTLPQER	K1(ICPL:13C(6)); K19(ICPL:13C(6)); K27(ICPL:13C(6))	4068.08				0.004807	0.123306					12.4	2.53194
ENSMUSP00000116567	LHPHAMASIR		1132.6				3.6e-05	0.000521709	20.32	0.154673	23.78	0.0697291	21.98	0.108075
ENSMUSP00000116401	ILHGGMIHR		1033.57				0	0.000288777	32.54	0.00819063	19.46	0.166463	14.51	0.529226
ENSMUSP00000116146	MGNTPDSASDNLGFR		1581.69				0	2.53491e-08	32.25	0.00345484	76.68	1.03096e-07
ENSMUSP00000116035	LMGAGKKEHTGR	K6(ICPL); K7(ICPL)	1494.73	1.11691	-;1;-		0.001482	0.0264743			21.4	0.0974366
ENSMUSP00000116035	LVIGDHKSTSHFR	K7(ICPL:13C(6))	1607.84	1.17844	-;1;1		0	3.55606e-06			49.17	0.000261489	49.65	0.000235754
ENSMUSP00000115967	VGVTVAQTTMEPHLLEACVR	C18(Carbamidomethyl)	2211.13				0	1.0144e-05	26.68	0.0643275	33.33	0.0139355	11.1	2.41801
ENSMUSP00000115967	KGKFAEGEATLR	K1(ICPL:13C(6)); K3(ICPL:13C(6))	1528.79				0	9.98692e-07					36.16	0.00430943
ENSMUSP00000115797	LMDSVALKGGR	K8(ICPL:13C(6))	1257.67	0.97867	-;-;1		3.6e-05	0.000519329					25.73	0.0388922
ENSMUSP00000115787	MGLVMDR		821.401				0.000185	0.00264351	29.1	0.011626	33.5	0.00330546
ENSMUSP00000115787	KACQIFVR	K1(ICPL:13C(6)); C3(Carbamidomethyl)	1132.6	1.23511	1;1;-	43.2152	0	5.53708e-05	14.65	0.503869	14.53	0.517985	33.91	0.00597472
ENSMUSP00000115787	MVPTGMGASLER		1248.61				6.7e-05	0.00101096	10.92	1.04373			11.98	0.805015
ENSMUSP00000115787	MGLAMGGAGGASFDR		1397.63				0	1.90375e-07	62.12	4.05083e-06	49.95	6.87874e-05	51.09	5.09614e-05
ENSMUSP00000115787	MGLAMGGAGGASFDR	M5(Oxidation)	1413.62				0	3.18755e-06	45.76	0.000112821	38.66	0.000578614
ENSMUSP00000115787	MGPAMGPALGAGIER	M5(Oxidation)	1443.71				0	1.34412e-05	46.74	0.000315636	33.68	0.00649251	62.62	8.58815e-06
ENSMUSP00000115787	MGPLGLDHMASSIER		1613.78				0	1.06417e-08	38.23	0.0021044	26.52	0.0304181	69.46	1.51742e-06
ENSMUSP00000115787	GGNRFEPYSNPTKR	K13(ICPL)	1727.82	0.505165	-;-;1		3.6e-05	0.000246708	11.9	0.729589			21.61	0.0779971
ENSMUSP00000115787	GGNRFEPYSNPTKR	K13(ICPL:13C(6))	1733.84	0.713987	1;1;-	9.38901	0	8.12952e-05	18.35	0.239797	20.09	0.155249	12.11	0.950448
ENSMUSP00000115787	GNFGGSFAGSFGGAGGHAPGVAR		2034.95				0	2.68378e-11	82.46	8.20102e-08	83.73	6.39701e-08	120.05	1.49272e-11
ENSMUSP00000115787	MGPLGLDHMASSIER	M1(Oxidation)	1629.77				3.6e-05	0.000250916			13.9	0.476635	22.62	0.0623598
ENSMUSP00000115787	GEIIAKQGGGGAGGSVPGIER	K6(ICPL:13C(6))	2021.05	3.371	-;1;1		0	5.09636e-12			85.98	5.18575e-08	98.65	2.93385e-09
ENSMUSP00000115729	VGDPLDLVALAEQVQKADEFIR	K16(ICPL:13C(6))	2537.34	1.36542	1;-;1	20.8139	0	5.30014e-11	19.76	0.242011			58.28	3.58853e-05
ENSMUSP00000115729	ANATNKLTVIAEQIQHLQEQAR	K6(ICPL:13C(6))	2587.37	1.39873	1;-;1	11.5914	0	4.06831e-06	17.78	0.425982			27.54	0.0452828
ENSMUSP00000115723	LFTNFHR		934.489				0.000272	0.00700663			23.65	0.057392	16.8	0.241314
ENSMUSP00000115700	KPISADAKEVHYKNR	K1(ICPL); K8(ICPL); K13(ICPL)	2071.01	0.161699	1;1;1	34.0601	0	2.28834e-05	26.54	0.0543458	37.43	0.00423782	31.38	0.0177942
ENSMUSP00000115700	YWHDNCFR	C6(Carbamidomethyl)	1197.49				0.000894	0.0129927			19.24	0.0160818
ENSMUSP00000115700	KPISADAKEVHYKNR	K1(ICPL:13C(6)); K8(ICPL:13C(6)); K13(ICPL:13C(6))	2089.08	0.224512	-;1;1		0	4.20756e-05			20.23	0.20391	27.86	0.0343731
ENSMUSP00000115506	VEEFSLPDALNEGQVQVR		2030.02				0	6.27258e-07	18.67	0.364028	14.44	0.926355	49.12	0.000320849
ENSMUSP00000115500	MKETIMNQEKLAKLQAQVR	N-Term(ICPL); K2(ICPL); K10(ICPL); K13(ICPL)	2679.32				0	1.15529e-05	10.62	2.60956	22.89	0.157297
ENSMUSP00000115495	RPYKAFKSNPIPR	K4(ICPL:13C(6)); K7(ICPL:13C(6))	1795.98	1.0993	-;-;1		0	5.06989e-05					20.6	0.161999
ENSMUSP00000115419	HQLLKK	K5(ICPL:13C(6)); K6(ICPL:13C(6))	988.577	0.854407	1;-;2	34.1212	0.001256	0.0351523	17.26	0.148466			15.84	0.205886
ENSMUSP00000115419	SHYEEGPGKNLPFSVENKWR	K9(ICPL); K18(ICPL)	2584.21	1.20257	-;1;1		0	7.62215e-07	34.9	0.00666603	27.88	0.0290015	20.86	0.158738
ENSMUSP00000115419	SHYEEGPGKNLPFSVENKWR	K9(ICPL:13C(6)); K18(ICPL:13C(6))	2596.24	1.0938	1;-;-		0	7.94151e-08	36.7	0.00494938	13.46	1.04589	19.16	0.28272
ENSMUSP00000115348	ELAESDFASTFR		1372.64				0	3.30859e-05					39.94	0.00114572
ENSMUSP00000115166	CTAQGWEPEVPCVR	C1(Carbamidomethyl); C12(Carbamidomethyl)	1688.75				0.003178	0.0560643			12.96	0.285791
ENSMUSP00000115166	IVSGAAETDQEYYFGQVVR		2132.03				0	1.2336e-10			82.59	1.32469e-07
ENSMUSP00000115062	LPVEEAYKR	K8(ICPL:13C(6))	1215.65				0.000101	0.00108508	12.27	1.27182
ENSMUSP00000115062	NHYNEEMSNLR		1406.61				0	3.71254e-05	23.61	0.0137186	16.17	0.0748793
ENSMUSP00000114842	IHHDQPVKPLDR	K8(ICPL:13C(6))	1565.83	1.26117	1;-;-		0	0.00031016	26.85	0.0409978	17.51	0.333548
ENSMUSP00000114734	YMPQNPHIIATKTPSSDVLVFDYTKHPAKPDPSGECNPDLR	K12(ICPL:13C(6)); K25(ICPL:13C(6)); K29(ICPL:13C(6)); C36(Carbamidomethyl)	4969.39				0	8.40743e-06					23.68	0.173562
ENSMUSP00000114649	HQYQPLSLRR		1297.71				0.000174	0.00314148	13.59	0.433147	20.45	0.0897063	13.23	0.465829
ENSMUSP00000114515;ENSMUSP00000065940	GKMSSYAFFVQTCR	K2(ICPL); C13(Carbamidomethyl)	1786.8				0	2.26377e-10	57.89	1.25167e-05	94.62	2.55406e-09	83.92	3.08186e-08
ENSMUSP00000114515;ENSMUSP00000065940	GKMSSYAFFVQTCR	K2(ICPL:13C(6)); C13(Carbamidomethyl)	1792.82				0	2.16797e-10	49.58	0.000121169	78.46	1.53253e-07	89.21	1.28346e-08
ENSMUSP00000114515;ENSMUSP00000065940	GKMSSYAFFVQTCR	K2(ICPL:13C(6)); M3(Oxidation); C13(Carbamidomethyl)	1808.81				0	6.26473e-07					67.12	1.3198e-06
ENSMUSP00000114515	WKTMSAKEKGKFEDMAKADKAR	K2(ICPL); K7(ICPL); K9(ICPL); K11(ICPL); K17(ICPL); K20(ICPL)	3186.43	0.838448	3;2;3	22.5296	0	1.66284e-08	52.24	6.77635e-05	52.91	5.21915e-05	55.69	2.83263e-05
ENSMUSP00000114515	WKTMSAKEKGKFEDMAKADKAR	K2(ICPL:13C(6)); K7(ICPL:13C(6)); K9(ICPL:13C(6)); K11(ICPL:13C(6)); K17(ICPL:13C(6)); K20(ICPL:13C(6))	3222.56	0.820946	1;1;-	19.0915	0	1.30145e-06	31.58	0.0203642	33.65	0.0142186	21.19	0.242544
ENSMUSP00000114515	EEHKKKHPDASVNFSEFSKKCSER	K4(ICPL); K5(ICPL); K6(ICPL); K19(ICPL); K20(ICPL); C21(Carbamidomethyl)	3429.52	1.17891	-;1;-		0	1.0731e-09	55.57	2.93972e-05	55.13	2.76212e-05	65.1	3.38387e-06
ENSMUSP00000114515	EEHKKKHPDASVNFSEFSKKCSER	K4(ICPL:13C(6)); K5(ICPL:13C(6)); K6(ICPL:13C(6)); K19(ICPL:13C(6)); K20(ICPL:13C(6)); C21(Carbamidomethyl)	3459.6	0.950192	1;1;1	16.7991	0	6.62599e-10	14.46	0.988346	66.75	4.97727e-06	24.98	0.0926059
ENSMUSP00000114515	WKTMSAKEKGKFEDMAKADKAR	K2(ICPL:13C(6)); K7(ICPL:13C(6)); K9(ICPL); K11(ICPL); K17(ICPL); K20(ICPL)	3198.45				0.001269	0.0217755			15.25	0.559759
ENSMUSP00000114515	WKTMSAKEKGKFEDMAKADKAR	K2(ICPL); M4(Oxidation); K7(ICPL); K9(ICPL); K11(ICPL); K17(ICPL); K20(ICPL)	3202.42				0	4.43611e-07			20.68	0.0688329	19.59	0.107703
ENSMUSP00000114515	WKTMSAKEKGKFEDMAKADKAR	K2(ICPL:13C(6)); K7(ICPL:13C(6)); K9(ICPL:13C(6)); K11(ICPL:13C(6)); M15(Oxidation); K17(ICPL:13C(6)); K20(ICPL:13C(6))	3238.55	1.07267	-;-;1		0	7.17002e-08					34.35	0.0102839
ENSMUSP00000114504	VLELLLPIR		1065.7				0.000304	0.00540742	13.44	0.0451825
ENSMUSP00000114504	DALKPNSPLTER	K4(ICPL)	1445.74	0.971094	-;-;1		0.007006	0.185267					10.38	1.74998
ENSMUSP00000114504	DHILLFNDAHFLMASLGAR		2141.1				0	6.03734e-07	37.67	0.0054635	30.84	0.0262076	32.62	0.0174225
ENSMUSP00000114504	WQTVLPVTQKHTR	K10(ICPL:13C(6))	1704.93	1.28734	-;2;2		0	5.03765e-06			36.77	0.0034502	22.2	0.103942
ENSMUSP00000114438	ILRPWQSSETR		1372.73				0	0.000567437	21.89	0.0967478	24.99	0.0535657	15.28	0.443242
ENSMUSP00000114438	GKGSVKEGKVGR	K2(ICPL); K6(ICPL); K9(ICPL)	1516.76	0.951288	1;-;1	46.5054	0	2.77547e-05	12.68	0.922563			13.55	0.766125
ENSMUSP00000114438	GKGSVKEGKVGR	K2(ICPL:13C(6)); K6(ICPL:13C(6)); K9(ICPL:13C(6))	1534.82				9.3e-05	0.00146407			22.22	0.0893689
ENSMUSP00000114317	KEKLPQVTR	K1(ICPL:13C(6)); K3(ICPL:13C(6))	1320.75	0.895753	-;-;1		0	0.00013451			23.95	0.0350364	27.44	0.0156863
ENSMUSP00000114247	LYTQNIDGLER		1321.67				0	1.45548e-05	37.65	0.00347017			53.54	8.80751e-05
ENSMUSP00000114247	RKDVVQLGDVVHGVER	K2(ICPL:13C(6))	1917.04	0.965201	1;-;1	4.9872	0	5.71643e-09	27.81	0.0303006			49.88	0.000188127
ENSMUSP00000114219	FTLNPNTTGVQNPHIER		1937.98				0	2.20158e-07	24.26	0.0761195	46.74	0.000437442	26.22	0.0502634
ENSMUSP00000114214	VCPFAGILENGIVR	C2(Carbamidomethyl)	1544.82				0	5.2716e-05					21.02	0.185414
ENSMUSP00000114214	ICPKPDDLPFATVVPLKTSYDPGEQIVYSCKPGYVSR	C2(Carbamidomethyl); K4(ICPL:13C(6)); K17(ICPL:13C(6)); C30(Carbamidomethyl); K31(ICPL:13C(6))	4530.23	1.05029	-;-;1		3.6e-05	0.000567407					24.57	0.185044
ENSMUSP00000114135	QINWTVLYR		1192.65				0	0.000280536	43.84	0.00056381	40.92	0.00119342	40.7	0.0011618
ENSMUSP00000114135	AITGASLADIMAKR	K13(ICPL:13C(6))	1528.83	1.05958	2;1;2	6.34707	0	9.74143e-11	93.88	7.20299e-09	77.83	2.93373e-07	73.72	7.43084e-07
ENSMUSP00000114135	AITGASLADIMAKR	M11(Oxidation); K13(ICPL)	1538.8	1.11222	1;1;-	8.47009	0	3.20365e-08	67.15	6.64996e-06	70.94	2.77453e-06
ENSMUSP00000114135	AITGASLADIMAKR	M11(Oxidation); K13(ICPL:13C(6))	1544.82				0	7.14063e-09	61.25	1.82224e-05	63.49	1.08347e-05
ENSMUSP00000114135	KHKKGQSEEIQKKR	K1(ICPL:13C(6)); K3(ICPL:13C(6)); K4(ICPL:13C(6)); K13(ICPL:13C(6))	2168.16				0	0.000205599	10.24	2.56903
ENSMUSP00000114135	KHKKGQSEEIQKKR	K1(ICPL); K3(ICPL); K4(ICPL); K12(ICPL); K13(ICPL)	2249.1	0.976154	1;4;3	12.0072	0	7.47933e-09	44.63	0.000945241	47.9	0.000454918	56.46	6.0101e-05
ENSMUSP00000114135	KHKKGQSEEIQKKR	K1(ICPL:13C(6)); K3(ICPL:13C(6)); K4(ICPL:13C(6)); K12(ICPL:13C(6)); K13(ICPL:13C(6))	2279.2	1.01562	2;1;1	11.6842	0	1.30559e-10	46.38	0.000661665	47.82	0.000476591	60.35	2.65239e-05
ENSMUSP00000114135	RKHKKGQSEEIQKKR	K2(ICPL); K4(ICPL); K5(ICPL); K13(ICPL); K14(ICPL)	2405.2	1.0074	2;2;2	10.6319	0	1.55094e-09	60.42	2.46473e-05	42.83	0.00145674	59.88	2.84761e-05
ENSMUSP00000114135	RKHKKGQSEEIQKKR	K2(ICPL:13C(6)); K4(ICPL:13C(6)); K5(ICPL:13C(6)); K13(ICPL:13C(6)); K14(ICPL:13C(6))	2435.3				0	1.81689e-08	43.67	0.00109747			56.42	5.3132e-05
ENSMUSP00000114135	MKVELCSFSGYKIYPGHGR	N-Term(ICPL); K2(ICPL); C6(Carbamidomethyl); K12(ICPL)	2544.16				0	7.87105e-07	33.35	0.00598783	38.45	0.00191472	30.49	0.012149
ENSMUSP00000114135	MKVELCSFSGYKIYPGHGR	N-Term(ICPL:13C(6)); K2(ICPL:13C(6)); C6(Carbamidomethyl); K12(ICPL:13C(6))	2562.23				0	7.68926e-06	25.97	0.0589326	26.53	0.051692	27.15	0.046357
ENSMUSP00000114135	TDGKVFQFLNAKCESAFLSKR	K4(ICPL); K12(ICPL); C13(Carbamidomethyl); K20(ICPL)	2761.32	0.803291	1;1;1	21.9377	0	1.19145e-10	38.6	0.00365112	67.76	4.3046e-06	43.74	0.00111162
ENSMUSP00000114135	TDGKVFQFLNAKCESAFLSKR	K4(ICPL:13C(6)); K12(ICPL:13C(6)); C13(Carbamidomethyl); K20(ICPL:13C(6))	2779.38	1.09993	-;1;1		0	0.0001887	19.59	0.362672	18.1	0.491749	20.49	0.283178
ENSMUSP00000114095	YREFPQLTR		1209.64				0.000129	0.00311435	18.38	0.222899	21.17	0.117249	26.42	0.0340911
ENSMUSP00000114013	IINAFFSEGEDQVNFR		1885.91				0	1.16151e-08	58.3	2.88426e-05	54.41	7.58899e-05	15.81	0.527468
ENSMUSP00000114013	SNKLHFAFR	K3(ICPL:13C(6))	1230.65	1.03716	-;1;1		0.00204	0.0346738			10.94	1.20404	10.86	1.22643
ENSMUSP00000114013	IPELAINPLGDR		1307.73				0	7.82442e-05					38.4	0.00195134
ENSMUSP00000114000	VYLHLR		800.478				0.00065	0.0133097	27.44	0.0152355	15.83	0.219422
ENSMUSP00000114000	YFDGSGGNNHAVEHYR		1822.79				0	2.87574e-09	29.57	0.00452672	21.25	0.0348701	41.43	0.000309363
ENSMUSP00000114000	RYFDGSGGNNHAVEHYR		1978.89				0.000838	0.0169858	13.2	0.411622
ENSMUSP00000114000	DQALKALR	K5(ICPL:13C(6))	1025.58	0.779813	-;-;1		3.6e-05	0.000668					28.45	0.0155749
ENSMUSP00000114000	DGLGGLPDIVR		1111.61				0.000272	0.0068067					26.89	0.0231248
ENSMUSP00000114000	SAAESISESVPVGPKVR	K15(ICPL:13C(6))	1823.96				0	0.000109059					34.67	0.00748918
ENSMUSP00000114000	FLVEEKIKCLATEKVKYTQR	K6(ICPL); K8(ICPL); C9(Carbamidomethyl); K14(ICPL); K16(ICPL)	2903.45	1.25294	-;-;1		0	0.000124813					11.04	2.79795
ENSMUSP00000114000	IGEWELIQESGVPLKPLFGPGYTGIR	K15(ICPL:13C(6))	2967.57	1.06909	-;-;1		0	5.15962e-05					30.37	0.0254378
ENSMUSP00000113761	LAELQAKHGDPGDAAQQEAKQR	K7(ICPL); K20(ICPL)	2571.23	0.918658	-;-;1		0	3.6604e-06	28.02	0.0404657	29.72	0.0265582	29.35	0.0281071
ENSMUSP00000113761	LAELQAKHGDPGDAAQQEAKQR	K7(ICPL:13C(6)); K20(ICPL:13C(6))	2583.27	1.05984	1;2;1	15.1383	0	8.40081e-09	44.19	0.00116987	46.92	0.000621901	43.69	0.00130834
ENSMUSP00000113761	LSNLALVKPEKTKAVENYLIQMAR	K8(ICPL:13C(6)); K11(ICPL:13C(6)); K13(ICPL:13C(6))	3062.66				0	1.08356e-05	19.86	0.165242			30.07	0.015941
ENSMUSP00000113672	LSVGLEDEQDLLEDLDR		1958.96				0	3.48763e-08	59.66	2.47108e-05	70.65	1.93293e-06	75.43	6.38712e-07
ENSMUSP00000113672	VEKVVYPGLPSHPQHELAKR	K3(ICPL); K19(ICPL)	2494.3	0.833505	1;-;1	1.78871	0	1.5889e-06	16.11	0.609817			18.88	0.333903
ENSMUSP00000113672	VEKVVYPGLPSHPQHELAKR	K3(ICPL:13C(6)); K19(ICPL:13C(6))	2506.34	0.924948	-;3;3		0	1.00986e-06	15.03	0.689342	22.66	0.119511	25.71	0.0549153
ENSMUSP00000113645	GEIAGPPDTPYEGGR		1515.71				0	4.23097e-05	23.21	0.0417838	42.46	0.000553356	31.8	0.00578107
ENSMUSP00000113554	VAHLALKHR	K7(ICPL)	1149.66	0.952315	2;1;2	20.6214	0	0.000110545	25.69	0.0230657	23.59	0.0374081	30.03	0.00844149
ENSMUSP00000113554	VAHLALKHR	K7(ICPL:13C(6))	1155.68	1.02416	2;2;3	8.45609	0	3.6134e-05	31.13	0.00462542	32.7	0.00322219	32.92	0.00306303
ENSMUSP00000113554	AAAASAAEAGIATPGTEGER		1800.87				0	6.34303e-06	42.29	0.00112433	23.72	0.08089	34.55	0.00689227
ENSMUSP00000113554	LQAQQDAVNIVCHSKTR	C12(Carbamidomethyl); K15(ICPL)	2073.03				0	2.80046e-05	16.43	0.566499	13.64	1.10291
ENSMUSP00000113554	LQAQQDAVNIVCHSKTR	C12(Carbamidomethyl); K15(ICPL:13C(6))	2079.05	1.04616	3;2;1	8.97508	0	2.51453e-08	28.72	0.0324949	34.46	0.00911355	48.99	0.000305362
ENSMUSP00000113554	IIAFVGSPVEDNEKDLVKLAKR	K14(ICPL:13C(6)); K18(ICPL:13C(6)); K21(ICPL:13C(6))	2774.5	0.767062	-;-;1		0	1.88459e-05	16.32	0.389687			10.06	1.62736
ENSMUSP00000113554	ILSKLHTVQPKGKITFCTGIR	K4(ICPL:13C(6)); K11(ICPL:13C(6)); K13(ICPL:13C(6)); C17(Carbamidomethyl)	2730.5	0.993567	-;-;1		0	5.67778e-08					37.32	0.00295638
ENSMUSP00000113502	VADGLPLAASMQEDEQSGR		1973.92				0	2.00482e-12	66.91	3.05556e-06	56.53	3.60176e-05	75.89	4.23805e-07
ENSMUSP00000113502	IMVANIEEVLQR		1414.77				0	5.78763e-09					61.64	8.8428e-06
ENSMUSP00000113502	NLGSINTELQDVQR		1586.81				0	2.80077e-08					68.23	2.75827e-06
ENSMUSP00000113502	DLQQYQSQAKQLFR	K10(ICPL:13C(6))	1863.94	1.36027	-;-;1		3.6e-05	0.000463544					12.07	1.3597
ENSMUSP00000113391	MKTILSNQTVDIPENVEITLKGR	N-Term(ICPL); K2(ICPL); K21(ICPL)	2914.48	0.0702656	-;1;-		0	2.74317e-05	17.11	0.626406	24.75	0.108026	21.83	0.223746
ENSMUSP00000113391	NFLGEKYIR	K6(ICPL:13C(6))	1250.66	1.15549	-;1;1		3.6e-05	0.000254292			12.86	0.802291	34.46	0.00529983
ENSMUSP00000113391	TICSHVQNMIKGVTLGFR	C3(Carbamidomethyl); K11(ICPL:13C(6))	2172.12	1.18651	-;1;-		0.000708	0.00887251			12.86	1.42601
ENSMUSP00000113391	MKTILSNQTVDIPENVEITLKGR	N-Term(ICPL:13C(6)); K2(ICPL:13C(6)); K21(ICPL:13C(6))	2932.54				0	3.43894e-05					30.54	0.0292299
ENSMUSP00000113371	TSRPLKILR	K6(ICPL:13C(6))	1194.74	1.1666	1;1;-	7.87502	0	0.00020756	20.9	0.00810905	13.41	0.0889272
ENSMUSP00000113371	SVEGLQEGSVLR		1273.67				0	1.53443e-07	49.95	0.000183096	48.29	0.000267595	63.12	8.79989e-06
ENSMUSP00000113371	LGYEEHIPGQTR		1399.7				0	2.32224e-05	27.73	0.0281654	30.75	0.0145141	42.61	0.000929329
ENSMUSP00000113371	ERPLCPLQPQNR	C5(Carbamidomethyl)	1507.78				0	0.00029966	13.18	0.92802	13.42	0.862202	20.11	0.186711
ENSMUSP00000113371	VVEEPYTVR		1091.57				0.000952	0.0171616			24.29	0.0471076
ENSMUSP00000113371	FNPDIFSPGVR		1248.64				9.3e-05	0.00142379			19.24	0.22574
ENSMUSP00000113371	IATPFQVYSWTAPQAEHAMDCVR	C21(Carbamidomethyl)	2678.25				0.000213	0.00373939			18.93	0.242443
ENSMUSP00000113371	FLSHSLVELLNQISPTFKKNFAVLQKKR	K18(ICPL:13C(6)); K19(ICPL:13C(6)); K26(ICPL:13C(6)); K27(ICPL:13C(6))	3730.07				0	0.000164913			15.84	0.192855
ENSMUSP00000113369	LFFKHVAGHYISPFHDIPLKADCKEEHDIPR	K4(ICPL); K20(ICPL); C23(Carbamidomethyl); K24(ICPL)	4031.93				0	4.10238e-06	11.21	3.49657			25.23	0.116218
ENSMUSP00000113369	LFFKHVAGHYISPFHDIPLKADCKEEHDIPR	K4(ICPL:13C(6)); K20(ICPL:13C(6)); C23(Carbamidomethyl); K24(ICPL:13C(6))	4050	0.978952	1;1;2	6.05742	0	7.33411e-09	13.5	2.25129	21.96	0.319353	12.39	2.88383
ENSMUSP00000113367	KSLNAGAYSKLVQER	K1(ICPL); K10(ICPL)	1873.95	0.865587	1;-;-		0	4.12986e-05	17.69	0.404263
ENSMUSP00000113367	KSLNAGAYSKLVQER	K1(ICPL:13C(6)); K10(ICPL:13C(6))	1886	0.925854	2;1;1	9.86118	0	2.01092e-08	33.5	0.0103854	39.01	0.00290143	39.84	0.00233444
ENSMUSP00000113367	CPTPPMMTLISVGGQHQGVFGLPR	C1(Carbamidomethyl)	2580.29				0	4.79391e-10	54.42	0.000129565	42.55	0.00199292	35.37	0.0105126
ENSMUSP00000113332	IRPTVQEDGGDVIYR		1717.89				0	1.21599e-06	51.35	0.000187969	40.44	0.00231786	53.97	0.000102221
ENSMUSP00000113071;ENSMUSP00000000590	ILALCMGNHELYMR	C5(Carbamidomethyl)	1720.83				0	6.64544e-06			56.98	2.82631e-05	10.72	1.38945
ENSMUSP00000113071;ENSMUSP00000000590	ILALCMGNHELYMR	C5(Carbamidomethyl); M6(Oxidation)	1736.83				0.001283	0.0368206					11.21	1.26391
ENSMUSP00000113071	IQVWHEEHR		1233.61				0	1.69832e-05	29.85	0.0156306	37.34	0.00260147	43.5	0.000674492
ENSMUSP00000113071	ALLENEKKKR	K7(ICPL); K8(ICPL); K9(ICPL)	1543.8	0.777965	1;-;-		0.000185	0.00213886	11.4	1.70242
ENSMUSP00000113071	PKTISVR	N-Term(ICPL:13C(6)); K2(ICPL:13C(6))	1022.58				0.003078	0.05468			14.51	0.256648
ENSMUSP00000113071	KESPLLFKFR	K1(ICPL:13C(6)); K8(ICPL:13C(6))	1486.82	1.01819	-;1;-		0	3.54376e-05			33.21	0.00768822
ENSMUSP00000113071	AQSEAEKLAKER	K7(ICPL:13C(6)); K10(ICPL:13C(6))	1581.8	1.02122	-;2;1		0	6.8564e-06			49.6	0.000168858	24.04	0.0660716
ENSMUSP00000113071	VQKHLKALTSELANAR	K3(ICPL); K6(ICPL)	1989.06	0.665059	-;1;-		0	6.48654e-05			15.83	0.548554
ENSMUSP00000113071	VLEQHKLNKDQWEER	K6(ICPL:13C(6)); K9(ICPL:13C(6))	2174.08	1.1302	-;1;1		0	1.04204e-08			32.99	0.0128097	41.87	0.00167083
ENSMUSP00000113071	DESKKTANDMIHAENMR	K4(ICPL:13C(6)); K5(ICPL:13C(6))	2212	1.24115	-;1;-		0	5.84731e-06			29.81	0.00982037
ENSMUSP00000113071	KKKESEAVEWQQKAQMVQEDLEKTR	K1(ICPL); K2(ICPL); K3(ICPL); K13(ICPL); K23(ICPL)	3571.67	1.00792	-;1;-		0	7.25693e-09			38.26	0.00394844
ENSMUSP00000113071	EKEELMEKLKQIEEQTKKAQQELEEQTRR	K2(ICPL:13C(6)); K8(ICPL:13C(6)); K10(ICPL:13C(6)); K17(ICPL:13C(6)); K18(ICPL:13C(6))	4185.1	1.89194	-;-;1		0.000213	0.00338914			26.6	0.122077	12.12	3.50151
ENSMUSP00000113071	VLEQHKLNKDQWEER	K6(ICPL); K9(ICPL)	2162.04				0	3.27264e-06					23.79	0.0829393
ENSMUSP00000113071	AKFYPEDVSEELIQDITQR	K2(ICPL:13C(6))	2392.18	0.831946	-;-;1		0	1.22564e-05					16.51	0.62205
ENSMUSP00000112861;ENSMUSP00000078715;ENSMUSP00000128803	VFDKEGNGTVMGAELR	K4(ICPL)	1827.87				0	1.58431e-12	62.23	8.73681e-06	68.24	2.15955e-06	114.78	4.80693e-11
ENSMUSP00000112861;ENSMUSP00000078715;ENSMUSP00000128803	VFDKEGNGTVMGAELR	K4(ICPL); M11(Oxidation)	1843.86				0	2.51143e-07			39.42	0.00168575	44.44	0.000572001
ENSMUSP00000112861	TGECKITLSQVGDVLR	C4(Carbamidomethyl); K5(ICPL)	1880.95				0	9.98357e-12	79.64	2.74322e-07	67.82	4.11338e-06	88.2	3.82174e-08
ENSMUSP00000112861	MSFSADQIADFKEAFLLFDR	M1(Oxidation)	2367.13				0.000272	0.00705092	19.55	0.220171	16.45	0.454061	24.76	0.0638313
ENSMUSP00000112798	LPLAAQAHPFRPPVR		1669.96				6.7e-05	0.000950621			10.74	0.510218	14.24	0.227906
ENSMUSP00000112798	ADAVQEATFQVELPR		1673.85				0	9.45932e-08			52.1	0.000131951
ENSMUSP00000112754	AAKELKQQGAEVVR	K3(ICPL:13C(6)); K6(ICPL:13C(6))	1748.95	1.08818	1;1;-	1.886	5.1e-05	0.000807492	23.95	0.0688646	20.85	0.131559
ENSMUSP00000112754	LGLHYVVYSGLENIR		1732.93				0	1.14149e-06			16.22	0.386825	29.69	0.0173986
ENSMUSP00000112754	ALLEDGTFR		1021.53				0.00232	0.0584248					26.74	0.0290215
ENSMUSP00000112754	FYTLKPDR	K5(ICPL:13C(6))	1150.6				0.000247	0.00419173					20.23	0.12282
ENSMUSP00000112747	EFFVGLSKR	K8(ICPL)	1187.62	0.784171	-;-;1		0.000708	0.00993914			13.62	0.73215	14.82	0.555392
ENSMUSP00000112747	EFFVGLSKR	K8(ICPL:13C(6))	1193.64	0.828585	-;1;-		0	0.000360355			26.31	0.0304049
ENSMUSP00000112722	HLPGPFHR		960.518				0.000185	0.00214036	30.6	0.0124983	29.77	0.0119673
ENSMUSP00000112615	HLKQTYIR	K3(ICPL)	1163.63				0	0.000144753	15.99	0.266874	11.87	0.666383	36.66	0.00221169
ENSMUSP00000112615	MFSNQGVCTLEIR	C8(Carbamidomethyl)	1554.74				0	4.37939e-06	41.31	0.000902318	32.91	0.00624252	53.17	6.55449e-05
ENSMUSP00000112615	SGEGQEDAGELDFSGLLKR	K18(ICPL)	2112.98	0.027728	-;1;-		0.001583	0.0289182	14.39	0.542233	11.14	1.12293
ENSMUSP00000112615	RVEKKSAAFAKILDPAYQVDKGGKVR	K4(ICPL); K5(ICPL); K11(ICPL); K21(ICPL); K24(ICPL)	3399.72				0.000616	0.0110685	25.37	0.115144	13.07	1.89625
ENSMUSP00000112615	LKVVHKGR	K2(ICPL); K6(ICPL)	1146.65				0.000213	0.00413011			18.15	0.114066
ENSMUSP00000112615	AESYPDSSTLVIDVAER		1851.89				0.003009	0.053411			14.32	0.628708
ENSMUSP00000112615	LEIPVTGEPPPKAIWSR	K12(ICPL)	1995.07				0	3.77256e-05			27.68	0.0385575
ENSMUSP00000112615	VEKKSAAFAKILDPAYQVDKGGKVR	K3(ICPL); K4(ICPL); K10(ICPL); K20(ICPL); K23(ICPL)	3243.63				0	2.89733e-08			25.66	0.105805
ENSMUSP00000112606	NLGIQSQFTR		1163.62				0	0.000242217			18.28	0.192429	21.34	0.0973231
ENSMUSP00000112606	VLLMELEEAR		1202.64				0	5.52805e-07			56.11	3.50216e-05	61.1	1.10615e-05
ENSMUSP00000112606	LKTSTSNVEQYR	K2(ICPL:13C(6))	1536.77	1.38736	-;1;-		0	2.70814e-05			23.7	0.0780641
ENSMUSP00000112606	VLKDEVSKSVSR	K3(ICPL:13C(6)); K8(ICPL:13C(6))	1568.84	1.04286	-;1;-		0.000786	0.0115976			15.13	0.607666
ENSMUSP00000112606	SLQEQTVQLQSELSR		1745.9				0	5.57829e-08			58.67	2.81171e-05
ENSMUSP00000112606	GQNLLLTNLQTIQGILER		2024.15				0	1.15096e-05			42.5	0.000452685
ENSMUSP00000112606	LQEDTDKANKHSSVLER	K7(ICPL:13C(6)); K10(ICPL:13C(6))	2192.08	0.965422	-;1;-		0.000133	0.00197161			12.11	1.69789
ENSMUSP00000112606	AQKAVASLSAKLEQAMKEIQR	K3(ICPL:13C(6)); K11(ICPL:13C(6)); K17(ICPL:13C(6))	2633.4	1.29916	-;1;-		0	1.43787e-08			32.47	0.0127121
ENSMUSP00000112606	INKYLDEIVKEVEAKAPILKR	K3(ICPL); K10(ICPL); K15(ICPL); K20(ICPL)	2889.53	1.22	-;1;-		0	1.75398e-07			19.01	0.346036	21.74	0.185893
ENSMUSP00000112606	ILLSQTTGMAIPLQASSLDDISLLSTPKR	K28(ICPL:13C(6))	3180.72				0.000174	0.0026306			16.2	0.436588
ENSMUSP00000112606	GNHVIRDEEVSSADISSSSEVISQHLVSYR		3300.61				0	7.38591e-09			46.57	0.000778735	46.85	0.000738373
ENSMUSP00000112606	SQNTKISTQLDFASKR	K5(ICPL:13C(6)); K15(ICPL:13C(6))	2046.05	1.39655	-;-;1		3.6e-05	0.000262349					10.72	2.05453
ENSMUSP00000112606	INKYLDEIVKEVEAKAPILKR	K3(ICPL:13C(6)); K10(ICPL:13C(6)); K15(ICPL:13C(6)); K20(ICPL:13C(6))	2913.61	1.00055	-;-;1		0	2.07173e-05					22.98	0.0538746
ENSMUSP00000112606	EKGNEILELKCNLENKKEEVLR	K2(ICPL:13C(6)); K10(ICPL:13C(6)); C11(Carbamidomethyl); K16(ICPL:13C(6)); K17(ICPL:13C(6))	3129.59				0	1.85592e-05					21.79	0.232769
ENSMUSP00000112425	VGEIVVFR		918.54				0.006607	0.175679					13.59	0.240637
ENSMUSP00000112425	VLKIHEKQDGHIKFLTKGDNNAVDDR	K3(ICPL:13C(6)); K7(ICPL:13C(6)); K13(ICPL:13C(6)); K17(ICPL:13C(6))	3434.76	1.23631	-;-;1		3.6e-05	0.000644058					32.09	0.0209199
ENSMUSP00000112424	VHIDIGADGR		1052.55				0	6.0936e-05	14.62	0.345144	19.57	0.119793	32.42	0.00572796
ENSMUSP00000112424	GMGGHGYGGAGDASSGFHGGHFVHMR		2543.08				0	1.98641e-06	17.78	0.0466829	28.26	0.00395591	40.9	0.0002154
ENSMUSP00000112378	IHYVGQNEPELLVAHAYTR		2210.13				0	9.74925e-09	28.82	0.0392348	44.78	0.000996315
ENSMUSP00000112368	SSSSGHYVSWVR		1351.64				0	1.06594e-05			32.93	0.0060101	51.48	8.78349e-05
ENSMUSP00000112368	LPAYLTIQMVR		1304.74				0.002345	0.0592574					11.32	0.737904
ENSMUSP00000112320	AVIAPSGVEKKR	K10(ICPL:13C(6)); K11(ICPL:13C(6))	1476.84				0	0.000184127					28.24	0.0151468
ENSMUSP00000112308	GGGGNFGPGPGSNFR		1377.63				0	5.87633e-07	52.89	2.67303e-05	63.04	2.60711e-06	50.99	4.17984e-05
ENSMUSP00000112308	KLFIGGLSFETTEESLR	K1(ICPL)	2032.04	1.00132	1;1;1	10.3545	0	1.2254e-11	65.37	6.70829e-06	86.61	5.31495e-08	80.49	2.1752e-07
ENSMUSP00000112308	KLFIGGLSFETTEESLR	K1(ICPL:13C(6))	2038.06	1.21281	1;3;3	39.2361	0	2.83389e-14	90.5	2.12563e-08	81.73	1.71886e-07	84.84	7.72664e-08
ENSMUSP00000112308	NMGGPYGGGNYGPGGSGGSGGYGGR		2189.9				0	8.90663e-17	146.8	2.71608e-15	117.02	2.78053e-12	130.41	1.41037e-13
ENSMUSP00000112308	NMGGPYGGGNYGPGGSGGSGGYGGR	M2(Oxidation)	2205.9				0	5.90455e-15	103.79	4.16841e-11	93.66	4.29507e-10	124.98	3.16935e-13
ENSMUSP00000112308	GFGFVTFSSMAEVDAAMAARPHSIDGR		2827.32				0	2.28585e-06	52.65	0.000110823	39.86	0.00222044	32.83	0.010919
ENSMUSP00000112308	NYYEQWGKLTDCVVMRDPASKR	K8(ICPL:13C(6)); C12(Carbamidomethyl); K21(ICPL:13C(6))	2938.38	1.13625	2;4;2	5.15425	0	1.10347e-07	21.12	0.184284	50.27	0.000207209	46.93	0.000450146
ENSMUSP00000112308	EESGKPGAHVTVKKLFVGGIKEDTEEHHLR	K5(ICPL); K13(ICPL); K14(ICPL); K21(ICPL)	3747.83	0.851068	1;5;3	10.374	0	5.35944e-05	26.76	0.107435	28.85	0.0673086	33.1	0.0248563
ENSMUSP00000112308	EESGKPGAHVTVKKLFVGGIKEDTEEHHLR	K5(ICPL:13C(6)); K13(ICPL:13C(6)); K14(ICPL:13C(6)); K21(ICPL:13C(6))	3771.94	0.98257	2;-;-		0	1.01601e-05	29.99	0.0466072	18.14	0.760403	33.37	0.0193308
ENSMUSP00000112308	GFGFVTFDDHDPVDKIVLQKYHTINGHNAEVR	K15(ICPL); K20(ICPL)	3878.87				3.6e-05	0.000594441	21.46	0.295087			12.73	2.41067
ENSMUSP00000112308	GFGFVTFDDHDPVDKIVLQKYHTINGHNAEVR	K15(ICPL:13C(6)); K20(ICPL:13C(6))	3890.91	1.5307	-;2;1		0	6.20765e-07	29.25	0.060673	30.85	0.0383576	32.78	0.0273896
ENSMUSP00000112308	NYYEQWGKLTDCVVMR	K8(ICPL:13C(6)); C12(Carbamidomethyl)	2172.99	2.32105	-;1;-		0	7.83004e-05			13.15	0.530169
ENSMUSP00000112308	GFGFVTFSSMAEVDAAMAARPHSIDGR	M17(Oxidation)	2843.32				0	3.18156e-05			13.75	0.72321
ENSMUSP00000112308	NYYEQWGKLTDCVVMRDPASKR	K8(ICPL); C12(Carbamidomethyl); K21(ICPL)	2926.34	1.09339	-;-;2		0	1.52564e-08			29.82	0.0154784	48.92	0.000196197
ENSMUSP00000112308	GFGDGYNGYGGGPGGGNFGGSPGYGGGR		2495.04				0	7.14786e-11					126.47	4.62119e-13
ENSMUSP00000112283	RFQGLSLPTHLR		1424.81				0	0.000144753					27.8	0.0142724
ENSMUSP00000112259	KSSTPEEVKKR	K1(ICPL:13C(6)); K9(ICPL:13C(6)); K10(ICPL:13C(6))	1621.85	0.766333	2;1;2	11.8859	0	1.07818e-06	19.79	0.207285	12.68	1.06553	64.47	7.05614e-06
ENSMUSP00000112259	KSSTPEEVKKR	K1(ICPL); K9(ICPL); K10(ICPL)	1603.79				0	4.02035e-06					46.77	0.000373421
ENSMUSP00000112216	KTPQGPPEIYSDTQFPSLQSTAKHVESR	K1(ICPL:13C(6)); K23(ICPL:13C(6))	3350.64				0	4.38289e-07			27.16	0.0789429
ENSMUSP00000112121	VGHIAHLNLR		1129.66				0	5.39578e-06	16.19	0.247649	16.02	0.257536	28.12	0.0158795
ENSMUSP00000112105	VVLIGGKPDR		1053.64				0.001998	0.0396253	19.13	0.0311559
ENSMUSP00000112105	NTDEMVELR		1106.51				0	1.44578e-05	10.86	0.680892	18.97	0.105849	42.35	0.000486056
ENSMUSP00000112105	GGDLMAYDRR		1153.54				0.002819	0.0685496	18.83	0.132227	18.96	0.134046	18.05	0.164509
ENSMUSP00000112105	VVLIGGKPDR	K7(ICPL)	1158.66				0	2.57302e-05	38.63	0.00146684	30.56	0.00940554
ENSMUSP00000112105	VVLIGGKPDR	K7(ICPL:13C(6))	1164.68	0.810828	3;3;1	9.8731	0	1.20202e-05	44.37	0.000182797	40.48	0.000447682	51.1	3.88124e-05
ENSMUSP00000112105	NLPLPPPPPPR		1194.7				0	0.000177591	27.79	0.00889926	29.18	0.00700532	30.09	0.00568104
ENSMUSP00000112105	SRNTDEMVELR		1349.65				0	4.26904e-05	28.94	0.0179978	36.15	0.00325166	38.71	0.00203898
ENSMUSP00000112105	TDYNASVSVPDSSGPER		1780.8				0	8.11433e-12	55.52	1.97783e-05	51.07	5.54956e-05	72.87	3.58909e-07
ENSMUSP00000112105	HESGASIKIDEPLEGSEDR	K8(ICPL)	2174	0.724594	2;1;2	28.0181	0	5.32293e-09	36.42	0.00241716	35.43	0.00332245	54.57	4.24205e-05
ENSMUSP00000112105	HESGASIKIDEPLEGSEDR	K8(ICPL:13C(6))	2180.02	1.36883	1;2;2	56.3611	0	6.81197e-12	30.46	0.0129528	75.42	4.33488e-07	94.27	5.64907e-09
ENSMUSP00000112105	VVECIKIILDLISESPIKGR	C4(Carbamidomethyl); K6(ICPL); K18(ICPL)	2492.36	0.845558	1;1;1	1.46544	0	1.32795e-06	32.38	0.0107526	30.16	0.0176381	43.31	0.00087732
ENSMUSP00000112105	VVECIKIILDLISESPIKGR	C4(Carbamidomethyl); K6(ICPL:13C(6)); K18(ICPL:13C(6))	2504.4	1.02417	3;2;2	27.8527	0	4.54273e-12	41.36	0.000723828	27.05	0.0199215	57.17	1.95704e-05
ENSMUSP00000112105	ENTQTTIKLFQECCPHSTDR	K8(ICPL); C13(Carbamidomethyl); C14(Carbamidomethyl)	2570.14	0.914685	1;-;-		0	6.95597e-05	10.51	0.755821
ENSMUSP00000112105	ENTQTTIKLFQECCPHSTDR	K8(ICPL:13C(6)); C13(Carbamidomethyl); C14(Carbamidomethyl)	2576.16	1.29829	2;2;2	4.68346	0	7.40643e-05	41.3	0.000693125	22.87	0.0482849	37.8	0.0015932
ENSMUSP00000112105	LLIHQSLAGGIIGVKGAKIKELR	K15(ICPL); K18(ICPL); K20(ICPL)	2729.56	0.806517	1;1;-	7.32366	0	3.47184e-05	21.53	0.0414813	23.35	0.0258933	18.76	0.0778316
ENSMUSP00000112105	LLIHQSLAGGIIGVKGAKIKELR	K15(ICPL:13C(6)); K18(ICPL:13C(6)); K20(ICPL:13C(6))	2747.62	0.893087	2;5;6	10.4242	0	4.15187e-11	26.4	0.00423811	42.54	0.000103079	39.17	0.000236067
ENSMUSP00000112105	ILLQSKNAGAVIGKGGKNIKALR	K6(ICPL); K14(ICPL); K17(ICPL); K20(ICPL)	2769.53	0.982181	4;2;4	14.6556	0	4.7745e-10	58.76	1.79611e-05	26.63	0.0296574	50.84	0.000110847
ENSMUSP00000112105	ILLQSKNAGAVIGKGGKNIKALR	K6(ICPL:13C(6)); K14(ICPL:13C(6)); K17(ICPL:13C(6)); K20(ICPL:13C(6))	2793.61	0.98498	1;3;-	40.2076	0	3.32223e-09	37.61	0.000814888	35.86	0.00114144	40.63	0.000389236
ENSMUSP00000112105	GSYGDLGGPIITTQVTIPKDLAGSIIGKGGQR	K19(ICPL); K28(ICPL)	3379.78	1.19882	1;2;1	27.4637	0	4.05713e-07	24.88	0.104678	34.84	0.0113685	41.57	0.0022292
ENSMUSP00000112105	GSYGDLGGPIITTQVTIPKDLAGSIIGKGGQR	K19(ICPL:13C(6)); K28(ICPL:13C(6))	3391.81	0.695005	3;3;4	14.9803	0	1.01534e-09	59.58	2.91908e-05	38.76	0.00353236	49.24	0.000323422
ENSMUSP00000112105	IITITGTQDQIQNAQYLLQNSVKQYSGKFF	K23(ICPL); K28(ICPL)	3656.84	0.657082	1;-;1	1.60774	0	5.85688e-06	10.49	3.51516			36	0.00974612
ENSMUSP00000112105	IITITGTQDQIQNAQYLLQNSVKQYSGKFF	K23(ICPL:13C(6)); K28(ICPL:13C(6))	3668.9	0.635324	-;1;-		0.001269	0.0214936			14.59	1.27198
ENSMUSP00000111893	DPANIKWGEASAEYVVESTGVFTTMEKAGAHLKGGAKR	K6(ICPL); K27(ICPL); K33(ICPL); K37(ICPL)	4426.08				0	6.65035e-06	50.32	0.000341395	31.74	0.0245178	52.64	0.00021644
ENSMUSP00000111893	DPANIKWGEASAEYVVESTGVFTTMEKAGAHLKGGAKR	K6(ICPL:13C(6)); K27(ICPL:13C(6)); K33(ICPL:13C(6)); K37(ICPL:13C(6))	4450.18				0.002745	0.0486558			13.22	2.42265
ENSMUSP00000111520	GSIITNPCVVCR	C8(Carbamidomethyl); C11(Carbamidomethyl)	1375.68				0	0.00060294	49.65	0.000177764
ENSMUSP00000111520	EIFVTFR		911.498				0.000748	0.0198759					15.75	0.216849
ENSMUSP00000111520	VTIPVPAGVEDGQTVR		1637.89				0.000693	0.0157189					23.71	0.0642654
ENSMUSP00000111520	INSYGYGDHYIHIKIR	K14(ICPL:13C(6))	2060.04				0	4.66231e-05					14.96	0.876077
ENSMUSP00000111516	LDERPIHAEPQYPVR		1819.94				9.8e-05	0.00194538			14.84	0.849767	12.89	1.32109
ENSMUSP00000111516	YSVTGPGADQPPTGIFIINPISGQLSVTKPLDR	K29(ICPL:13C(6))	3549.87	1.14805	-;1;1		0	3.26023e-07			49.96	0.000279058	55.89	7.29099e-05
ENSMUSP00000111516	RLDERPIHAEPQYPVR		1976.05				6.7e-05	0.000954718					17.64	0.326294
ENSMUSP00000111516	FAILTDPNSNDGLVTVVKPIDFETNR	K18(ICPL:13C(6))	2986.53				0	2.32554e-05					27.37	0.066513
ENSMUSP00000111505	FRPTLVFR		1035.61				0	0.000430217	25.9	0.0113097	27.26	0.00817503	27.69	0.0074895
ENSMUSP00000111505	EDLLNNVAR		1043.55				9.8e-05	0.0019798	19.43	0.18187	31.97	0.0110548	18.01	0.260115
ENSMUSP00000111505	GNYLVDVDGNR		1221.58				0	1.29542e-06	36.89	0.00245573	39.11	0.00130722	42.71	0.000570623
ENSMUSP00000111505	GTFCSFDTPDEAIR	C4(Carbamidomethyl)	1615.71				0	9.58352e-05	35.88	0.000955436	35.8	0.00111786	49.94	4.30912e-05
ENSMUSP00000111505	NKGVVLGGCGDKSIR	K2(ICPL); C9(Carbamidomethyl); K12(ICPL)	1769.88	0.852705	1;-;1	5.82756	0	1.75962e-09	41.67	0.00125942	38.98	0.00228285	57.96	3.21511e-05
ENSMUSP00000111505	TVAGIIVEPIQSEGGDNHASDDFFR		2674.28				0	5.7273e-05	21.03	0.180255	10.07	2.22879	28.41	0.0325197
ENSMUSP00000111505	NKGVVLGGCGDKSIR	K2(ICPL:13C(6)); C9(Carbamidomethyl); K12(ICPL:13C(6))	1781.91	0.871709	-;1;-		0	7.91859e-09			65.84	5.65535e-06
ENSMUSP00000111505	SKELMKQLNTIQNAEAVHFFCNYEESR	K2(ICPL:13C(6)); K6(ICPL:13C(6)); C21(Carbamidomethyl)	3508.65				0	2.05716e-06			13.69	1.05608	24.13	0.101228
ENSMUSP00000111505	NKLILIAR	K2(ICPL:13C(6))	1051.67	0.887373	-;-;2		0	0.000196142					33.15	0.000483025
ENSMUSP00000111505	LKYPLEEFTTDNQQEEAR	K2(ICPL:13C(6))	2322.1	0.852682	-;-;1		0	2.34024e-06					28.68	0.026494
ENSMUSP00000111292	HLQIDIER		1023.56				0.000495	0.00600697	23.03	0.0736651	21.99	0.087589
ENSMUSP00000111282	YDSRPGGYGYGYGR		1567.69				0	1.61687e-09	39.3	0.000481708	47.13	7.93933e-05	36	0.00102987
ENSMUSP00000111282	GFGFITFTNPEHASDAMR	M17(Oxidation)	2013.91				0	2.90338e-09	33.55	0.00344425	70.48	6.93908e-07	53.3	4.46687e-05
ENSMUSP00000111282	MSSEEGKLFVGGLNFNTDEQALEDHFSSFGPISEVVVVKDR	M1(Oxidation); K39(ICPL)	4635.18				0	0.000310634	38.38	0.00553981	14.92	1.20468	20.87	0.365445
ENSMUSP00000111282	GFGFITFTNPEHASDAMR		1997.92				0	1.13208e-07					37.92	0.00187266
ENSMUSP00000111190	SLVFPEAENR		1161.59				0	5.1196e-06	36.57	0.00338149	33.79	0.0064137	39.05	0.00190411
ENSMUSP00000111190	VLSSMTDAVLAR		1262.68				0	4.6497e-09	95.88	4.13162e-09	104.56	5.58163e-10	84.68	5.42951e-08
ENSMUSP00000111190	VLSSMTDAVLAR	M5(Oxidation)	1278.67				0	2.71775e-06	63.46	6.55938e-06	56.64	3.14317e-05	48.81	0.000184131
ENSMUSP00000111190	KPEEVDDEVFYSPR	K1(ICPL)	1814.82	1.02505	3;-;-		0	2.78443e-10	92.48	4.99969e-09	68.14	1.35814e-06	73.34	4.26371e-07
ENSMUSP00000111190	KPEEVDDEVFYSPR	K1(ICPL:13C(6))	1820.84	0.910071	1;3;5	8.63787	0	1.18203e-09	79.47	1.23148e-07	82.82	5.72024e-08	74.6	3.83144e-07
ENSMUSP00000111190	GGNVLITDTWISMGQEDEKKKR	K19(ICPL); K20(ICPL); K21(ICPL)	2820.34	0.812415	1;1;1	32.3822	0	6.24267e-09	33.84	0.0110284	42.15	0.00162137	49.83	0.000272979
ENSMUSP00000111190	GGNVLITDTWISMGQEDEKKKR	K19(ICPL:13C(6)); K20(ICPL:13C(6)); K21(ICPL:13C(6))	2838.4	0.886618	2;3;2	5.07203	0	1.76119e-08	54.98	0.000103248	48.97	0.000411987	65.18	9.86015e-06
ENSMUSP00000111190	IKQKGEYLPLLQGKSLGMIFEKR	K2(ICPL); K4(ICPL); K14(ICPL); K22(ICPL)	3096.61	0.857892	5;2;5	8.39444	0	6.60352e-09	53.22	0.000139118	46.25	0.000672284	71.72	1.99201e-06
ENSMUSP00000111190	IKQKGEYLPLLQGKSLGMIFEKR	K2(ICPL:13C(6)); K4(ICPL:13C(6)); K14(ICPL:13C(6)); K22(ICPL:13C(6))	3120.7	1.24169	-;1;-		0	4.00526e-12	45.47	0.000442715	43.06	0.000743938	58.98	1.93505e-05
ENSMUSP00000111190	LQAFQGYQVTMKTAKVAASDWTFLHCLPR	K12(ICPL); K15(ICPL); C26(Carbamidomethyl)	3577.76	0.987062	2;2;-	8.46842	0	1.32177e-07	43.76	0.00181123	49.57	0.000472546	40.98	0.00339946
ENSMUSP00000111190	LQAFQGYQVTMKTAKVAASDWTFLHCLPR	K12(ICPL:13C(6)); K15(ICPL:13C(6)); C26(Carbamidomethyl)	3589.79	1.00996	1;2;4	11.6849	0	3.9738e-10	39.33	0.00519814	55.62	0.000124056	73.05	2.24687e-06
ENSMUSP00000111190	LQAFQGYQVTMKTAKVAASDWTFLHCLPR	M11(Oxidation); K12(ICPL); K15(ICPL); C26(Carbamidomethyl)	3593.76	0.774529	1;1;-	14.7437	0	8.31993e-06	31.52	0.0291391	47.21	0.000748074
ENSMUSP00000111190	LSTETGFALLGGHPSFLTTQDIHLGVNESLTDTAR		3698.86				0	1.08039e-13	92.8	2.63978e-08	102.41	2.83039e-09	102.91	2.57376e-09
ENSMUSP00000111190	GGNVLITDTWISMGQEDEKKKR	M13(Oxidation); K19(ICPL:13C(6)); K20(ICPL:13C(6)); K21(ICPL:13C(6))	2854.4	1.25303	-;2;-		0	0.00013977			16.69	0.613938
ENSMUSP00000111190	IKQKGEYLPLLQGKSLGMIFEKR	K2(ICPL); K4(ICPL); K14(ICPL); M18(Oxidation); K22(ICPL)	3112.61	0.732491	-;1;1		0	3.29025e-11			23.4	0.136898	36.59	0.00670998
ENSMUSP00000111190	IKQKGEYLPLLQGKSLGMIFEKR	K2(ICPL:13C(6)); K4(ICPL:13C(6)); K14(ICPL:13C(6)); M18(Oxidation); K22(ICPL:13C(6))	3136.69	0.997949	-;-;1		0	1.67542e-08			19.68	0.20722	53.56	8.50271e-05
ENSMUSP00000111117	TLAFEELRR		1134.63				0.003742	0.0722475	22.48	0.0785262
ENSMUSP00000111117	IRDPNQGGKDITEEIMSGAR	K9(ICPL)	2292.1				0	5.5241e-05	39.26	0.00266205
ENSMUSP00000111117	IRDPNQGGKDITEEIMSGAR	K9(ICPL:13C(6))	2298.13	0.905991	1;1;1	13.419	0	1.25238e-05	41.62	0.00184214	17.36	0.483928	48.15	0.00040191
ENSMUSP00000111117	LSWGKGSSGGSGAKPSDTASEATRPATLNR	K5(ICPL:13C(6)); K14(ICPL:13C(6))	3168.55	0.670387	1;-;1	25.234	0	4.79169e-05	14.28	1.29518	15.44	1.05588	21.24	0.252169
ENSMUSP00000111117	LKEELEEAR	K2(ICPL:13C(6))	1227.63	1.79548	-;1;1		0	9.92279e-05			29.85	0.0132498	31.88	0.00924304
ENSMUSP00000111117	FMLQDVLDLR		1249.66				0	1.81448e-05			33.06	0.00753824	65.94	3.88392e-06
ENSMUSP00000111117	FSALQQTLPAENTDNRR		1960.98				0.001269	0.0221096			31.95	0.0168182	23.18	0.117325
ENSMUSP00000111117	LLTTIGKDLDFAKAKPR	K7(ICPL); K13(ICPL); K15(ICPL)	2202.17	0.43543	-;1;-		0	7.34119e-05			20.82	0.19705
ENSMUSP00000111117	TAADKDRGEEDADGSKTQDLFR	K5(ICPL:13C(6)); K16(ICPL:13C(6))	2647.2	1.99501	-;1;1		0	1.87477e-10			46.63	0.000312869	48.12	0.000221234
ENSMUSP00000111117	LSWGKGSSGGSGAKPSDTASEATRPATLNR	K5(ICPL); K14(ICPL)	3156.5	0.471667	-;1;-		0	1.1639e-06			17.01	0.522552
ENSMUSP00000111117	TASTPTPPQTGGSLEPQPNGESPQVAVIIRPDDR		3512.76				0	2.88419e-09			36.1	0.010408	88.97	5.3178e-08
ENSMUSP00000111117	LLTTIGKDLDFAKAKPR	K7(ICPL:13C(6)); K13(ICPL:13C(6)); K15(ICPL:13C(6))	2220.23	2.0656	-;-;1		0	2.19122e-07					34.08	0.00596032
ENSMUSP00000111074	GLKYELISETGGSHDKR	K3(ICPL); K16(ICPL)	2100.01	0.875292	1;1;1	4.17883	0	0.000242218	11.22	1.61967	30.51	0.019429	20.92	0.167483
ENSMUSP00000111074	EDITQSAQHALR		1368.69				0.000708	0.0106089			18.87	0.225709
ENSMUSP00000111074	GLKYELISETGGSHDKR	K3(ICPL:13C(6)); K16(ICPL:13C(6))	2112.05				0.00057	0.00706565			10.72	2.1223
ENSMUSP00000110969	YYEPYYAAGPSYGGR		1713.75				0	3.81611e-05	35.11	0.0010637	46.12	8.79635e-05	28.72	0.00483395
ENSMUSP00000110927	THMQDLKDVTNNVHYENYR	K7(ICPL)	2482.12	1.0479	1;-;-		0	7.65622e-10	28.03	0.0169203			44.16	0.000402893
ENSMUSP00000110927	THMQDLKDVTNNVHYENYR	K7(ICPL:13C(6))	2488.14	0.938301	-;-;1		0	1.63408e-09					54.55	4.98068e-05
ENSMUSP00000110673	ASGDKEAEGAPQVEAGKR	K5(ICPL); K17(ICPL)	2009.93	0.589751	-;1;2		0	5.6119e-07	12.08	1.00659	20.32	0.149564	23.41	0.0734219
ENSMUSP00000110673	ASGDKEAEGAPQVEAGKR	K5(ICPL:13C(6)); K17(ICPL:13C(6))	2021.97	1.52466	2;1;-	34.6009	0	0.000108338	20.74	0.155174	22.51	0.100989	18.35	0.263192
ENSMUSP00000110673	STHQAAVVSKIDSR	K10(ICPL:13C(6))	1609.84				0	0.000203098			34.98	0.00656024
ENSMUSP00000110673	STHQAAVVSKIDSR	K10(ICPL)	1603.82	0.816256	-;-;1		6.7e-05	0.00143569					17.85	0.30597
ENSMUSP00000110673	INEWLTKSPDGNKSPAPKPSDLRPGDVSGKR	K7(ICPL:13C(6)); K13(ICPL:13C(6)); K18(ICPL:13C(6)); K30(ICPL:13C(6))	3790.92	0.9171	-;-;1		0	5.74969e-06					21.35	0.330137
ENSMUSP00000110595	AIASATEGGSVPQIR		1456.78				0	1.44922e-10	35.21	0.00570965	60.64	1.6224e-05	61.46	1.40756e-05
ENSMUSP00000110595	VMGLGLSPEEKQR	K11(ICPL)	1548.78	1.15831	1;1;-	16.7776	0	4.98478e-05	36.87	0.00396787	34.78	0.00632053	30.85	0.0160748
ENSMUSP00000110595	VMGLGLSPEEKQR	K11(ICPL:13C(6))	1554.8	0.99196	-;-;1		0	0.000432426	19.07	0.251476	22	0.129031	37.16	0.00396157
ENSMUSP00000110595	APSHVPFLLIGGGTAAFAAAR		2024.11				0	1.10442e-06	24.95	0.0526218	30.7	0.0140863
ENSMUSP00000110595	EGVKVMPNAIVQSVGVSGGR	K4(ICPL:13C(6))	2095.11	0.992587	1;1;1	10.8549	0	5.86804e-06	30.19	0.0212018	48.67	0.000296791	42.3	0.00130723
ENSMUSP00000110595	KIIKDGEQHEDLNEVAKLFNIHED	K1(ICPL:13C(6)); K4(ICPL:13C(6)); K17(ICPL:13C(6))	3167.56	0.759221	-;2;1		0	1.45582e-08	31.5	0.0250967	48.79	0.000467739	57.58	6.12784e-05
ENSMUSP00000110595	KSQASGIEVIQLFPEKGNMGKILPQYLSNWTMEKVKR	K1(ICPL); K16(ICPL); K21(ICPL); K34(ICPL); K36(ICPL)	4773.38	0.978344	1;-;1	8.36635	0	5.06641e-08	16.11	1.34209	25.39	0.151183	38.58	0.00747461
ENSMUSP00000110595	LLIKLKDGR	K4(ICPL); K6(ICPL)	1265.74	1.01756	-;1;-		0	9.1108e-05			36.19	0.00176721
ENSMUSP00000110595	LLIKLKDGR	K4(ICPL:13C(6)); K6(ICPL:13C(6))	1277.78	1.01053	-;1;2		0	5.04613e-05			42.41	0.000206682	39.29	0.000423938
ENSMUSP00000110595	RAIASATEGGSVPQIR		1612.88				0.000247	0.00465385			16.9	0.3522	17	0.34119
ENSMUSP00000110595	SNIWVAGDAACFYDIKLGR	C11(Carbamidomethyl); K16(ICPL:13C(6))	2267.1	0.953375	-;1;-		0	3.72758e-06			18.79	0.32636
ENSMUSP00000110595	VLIVSEDPELPYMRPPLSKELWFSDDPNVTKTLQFR	K19(ICPL:13C(6)); K31(ICPL:13C(6))	4482.29				0	9.02631e-05			15.47	1.35936
ENSMUSP00000110595	KSQASGIEVIQLFPEKGNMGKILPQYLSNWTMEKVKR	K1(ICPL:13C(6)); K16(ICPL:13C(6)); K21(ICPL:13C(6)); K34(ICPL:13C(6)); K36(ICPL:13C(6))	4803.48	0.911167	-;1;-		0	7.65122e-08			37.47	0.00887245	26.36	0.117684
ENSMUSP00000110595	KIIKDGEQHEDLNEVAKLFNIHED	K1(ICPL); K4(ICPL); K17(ICPL)	3149.5				0	5.82362e-07					27.71	0.0476956
ENSMUSP00000110563	SKKFPSDKLER	K3(ICPL)	1439.76				0.004456	0.112196					26.02	0.0406306
ENSMUSP00000110546	ATLKDITR	N-Term(ICPL); K4(ICPL)	1127.58				0	1.76194e-06	60.65	1.19248e-05	52.36	8.79858e-05	44.74	0.000470033
ENSMUSP00000110546	ATLKDITR	N-Term(ICPL:13C(6)); K4(ICPL:13C(6))	1139.63				0	1.32425e-05	47.51	0.000222661	32.1	0.00724499	58.18	1.92349e-05
ENSMUSP00000110546	THSDQFLVSFKDVGR	K11(ICPL)	1840.9	0.857138	3;-;1	0.119219	0	1.19088e-07	61.36	1.41475e-05			66.63	4.28022e-06
ENSMUSP00000110546	THSDQFLVSFKDVGR	K11(ICPL:13C(6))	1846.92	0.906663	2;3;4	11.2193	0	2.48683e-09	82.86	1.17756e-07	49.45	0.000265593	71.09	1.78948e-06
ENSMUSP00000110546	MTAMDNASKNASDMIDKLTLTFNR	K9(ICPL); K17(ICPL)	2898.33	0.991255	2;1;2	7.67863	0	1.6112e-07	44.83	0.000537672	33.48	0.00706774	46.98	0.0003588
ENSMUSP00000110546	MTAMDNASKNASDMIDKLTLTFNR	K9(ICPL:13C(6)); K17(ICPL:13C(6))	2910.37	0.862159	1;-;-		0	5.63352e-07	30.01	0.0226977	12.08	1.41542	39.23	0.00281781
ENSMUSP00000110546	LKSIKNIQKITKSMKMVAAAKYAR	K2(ICPL); K5(ICPL); K9(ICPL); K12(ICPL); K15(ICPL); K21(ICPL)	3351.73				0	7.16999e-06	15.41	0.989825
ENSMUSP00000110546	VYGTGSLALYEKADIKAPEDKKKHLIIGVSSDR	K12(ICPL); K16(ICPL); K21(ICPL); K22(ICPL); K23(ICPL)	4127.08	1.00916	2;1;1	7.81491	0	7.65939e-05	29.47	0.0535523	29.03	0.0648259	25.04	0.157761
ENSMUSP00000110546	VYGTGSLALYEKADIKAPEDKKKHLIIGVSSDR	K12(ICPL:13C(6)); K16(ICPL:13C(6)); K21(ICPL:13C(6)); K22(ICPL:13C(6)); K23(ICPL:13C(6))	4157.18	0.935549	-;-;1		0	5.15654e-08	15.54	0.97739			39.81	0.00324908
ENSMUSP00000110535	LRESIPKAHR	K7(ICPL:13C(6))	1317.75	1.02808	1;-;1	3.93296	0	0.000147956	10.13	1.03845			30.47	0.00906403
ENSMUSP00000110531	MLMPKKNR	N-Term(ICPL); K5(ICPL); K6(ICPL)	1332.63				0.000272	0.00832473	15.77	0.325766			16.34	0.300794
ENSMUSP00000110531	MLMPKKNR	N-Term(ICPL:13C(6)); K5(ICPL:13C(6)); K6(ICPL:13C(6))	1350.69				0.000582	0.0097792	23.01	0.0975067	25.6	0.0537075
ENSMUSP00000110531	GYVKEQFAWR	K4(ICPL)	1388.68	1.12271	2;-;1	8.88344	0	1.81401e-05	56.37	3.933e-05	38.6	0.00235356	56.89	3.48919e-05
ENSMUSP00000110531	GYVKEQFAWR	K4(ICPL:13C(6))	1394.69	1.06364	-;1;-		0	0.000267719	41.24	0.00131534	44.75	0.00058619	41.39	0.00123075
ENSMUSP00000110531	DYLHLPPEIVPATLR		1733.96				0	3.14076e-05	27.72	0.0266244	27.85	0.0259213	28.02	0.0249263
ENSMUSP00000110531	HFYWYLTNEGIQYLR		2002.98				0	9.48264e-09	56.55	4.95733e-05	66.29	5.06346e-06	62.2	1.35275e-05
ENSMUSP00000110531	SRPETGRPRPKGPEGERPAR	K11(ICPL:13C(6))	2341.23	1.17593	1;1;1	8.41293	3.6e-05	0.000505314	15.92	0.789324	10.18	2.91658	16.2	0.725647
ENSMUSP00000110531	SAVPPGADKKAEAGAGSATEFQFR	K9(ICPL:13C(6)); K10(ICPL:13C(6))	2614.27	1.1265	1;-;-		0.000502	0.00748098	10.22	2.69021
ENSMUSP00000110531	SAVPPGADKKAEAGAGSATEFQFR	K9(ICPL); K10(ICPL)	2602.23				0	9.94529e-07					35.76	0.00607905
ENSMUSP00000110488	HASPEDIKKAYR	K8(ICPL:13C(6)); K9(ICPL:13C(6))	1636.83	1.05576	1;1;-	0.638762	0	4.131e-06	21.21	0.136987	32.81	0.00916301
ENSMUSP00000110460	ITLLEAQNR		1057.6				0.000133	0.00167162			26.79	0.0214647
ENSMUSP00000110460	KLQAALISR	K1(ICPL:13C(6))	1110.67	1.14711	-;1;-		0.000683	0.00837111			21.92	0.0237794
ENSMUSP00000110396	QMSLLLR		860.502				6.7e-05	0.000713619	43.4	0.000612498	41.49	0.000950834	43.23	0.000636949
ENSMUSP00000110396	VLSIGDGIAR		1000.58				0	2.00997e-07	63.58	4.2976e-06	58.73	1.29279e-05	54.9	3.12268e-05
ENSMUSP00000110396	STVAQLVKR	K8(ICPL)	1106.63	0.90584	1;1;-	2.08668	0	9.082e-06	49.74	0.000113071	66.01	2.55623e-06	66.1	2.76155e-06
ENSMUSP00000110396	STVAQLVKR	K8(ICPL:13C(6))	1112.65	0.932301	1;1;2	1.53176	0	1.5938e-05	59.14	9.38622e-06	63.27	3.88556e-06	43.77	0.000346301
ENSMUSP00000110396	VGLKAPGIIPR		1120.72				0	1.51232e-05	51.87	6.4859e-06
ENSMUSP00000110396	VGLKAPGIIPR	K4(ICPL)	1225.74				0	2.2029e-07	41.85	0.000199205	39.6	0.000345391	32.49	0.00171909
ENSMUSP00000110396	VGLKAPGIIPR	K4(ICPL:13C(6))	1231.76	0.926567	6;6;6	2.75017	0	1.48501e-07	50.82	2.23544e-05	54.58	9.40511e-06	56.59	5.92057e-06
ENSMUSP00000110396	RVGLKAPGIIPR	K5(ICPL)	1381.84	0.928551	1;1;-	0.59992	0.000226	0.00310207	25.46	0.00796449	19.75	0.0391924
ENSMUSP00000110396	RVGLKAPGIIPR	K5(ICPL:13C(6))	1387.86	0.963685	1;2;3	9.21196	0	0.000181274	29.52	0.00268047	19.93	0.02439	23.35	0.00994119
ENSMUSP00000110396	EAYPGDVFYLHSR		1553.74				0	4.45261e-09	74.99	4.7702e-07	88.14	2.3096e-08	76.73	3.16363e-07
ENSMUSP00000110396	ILGADTSVDLEETGR		1575.79				0	2.15494e-14	125.9	4.47249e-12	139.33	2.02441e-13	139.23	2.08351e-13
ENSMUSP00000110396	TGAIVDVPVGEELLGR		1624.89				0	1.04504e-06	59.81	1.38948e-05	49.27	0.000153204	52.33	7.77771e-05
ENSMUSP00000110396	EPMQTGIKAVDSLVPIGR	K8(ICPL)	2016.06	0.942036	4;1;2	3.50935	0	5.47558e-08	44.68	0.000760812	30.23	0.0216239	64.65	7.84938e-06
ENSMUSP00000110396	EPMQTGIKAVDSLVPIGR	K8(ICPL:13C(6))	2022.08	0.923168	-;3;-		0	1.21029e-07	42.86	0.000916164	38.23	0.00273572	45.11	0.000539558
ENSMUSP00000110396	QTGKTSIAIDTIINQKR	K4(ICPL); K16(ICPL)	2097.11	0.863918	1;3;2	0.802672	0	2.24929e-10	74.59	9.03594e-07	53.99	0.000101751	47.63	0.000448718
ENSMUSP00000110396	QTGKTSIAIDTIINQKR	K4(ICPL:13C(6)); K16(ICPL:13C(6))	2109.15	0.867503	4;1;3	0.618465	0	2.17016e-09	87.62	3.40774e-08	104.32	7.28562e-10	75.7	5.30232e-07
ENSMUSP00000110396	AMKQVAGTMKLELAQYR	K3(ICPL); K10(ICPL)	2148.07	0.870107	3;3;3	6.16023	0	1.63873e-12	102.14	1.43266e-09	108.18	3.57329e-10	56.68	5.0474e-05
ENSMUSP00000110396	AMKQVAGTMKLELAQYR	K3(ICPL:13C(6)); K10(ICPL:13C(6))	2160.11	1.06124	2;1;1	18.7503	0	2.56011e-14	88.43	3.63179e-08	104.57	8.65868e-10	118.57	3.65558e-11
ENSMUSP00000110396	AMKQVAGTMKLELAQYR	K3(ICPL); M9(Oxidation); K10(ICPL)	2164.07	1.26639	3;2;1	23.9047	0	2.06677e-07	46.44	0.000528879	39.67	0.00257868	58.26	3.58271e-05
ENSMUSP00000110396	VVDALGNAIDGKGPIGSKTR	K12(ICPL); K18(ICPL)	2178.13	0.884626	4;3;2	3.07914	0	7.64295e-11	60.18	2.19223e-05	44.73	0.000720135	87.37	4.40672e-08
ENSMUSP00000110396	VVDALGNAIDGKGPIGSKTR	K12(ICPL:13C(6)); K18(ICPL:13C(6))	2190.17	1.07442	3;2;3	7.85882	0	1.26574e-10	88.08	3.65652e-08	88.88	3.10607e-08	71.01	1.81879e-06
ENSMUSP00000110396	EVAAFAQFGSDLDAATQQLLSR		2338.17				0	1.23281e-14	129.38	3.02781e-12	110.42	2.32856e-10	132.34	1.4907e-12
ENSMUSP00000110396	ISVREPMQTGIKAVDSLVPIGR	K12(ICPL)	2471.34	0.924817	4;-;-		0	1.50695e-05	32.23	0.0104722
ENSMUSP00000110396	ISVREPMQTGIKAVDSLVPIGR	K12(ICPL:13C(6))	2477.36	0.939858	2;3;4	4.92276	0	8.85758e-10	24.23	0.0434208	32.75	0.00586627	73.03	5.52488e-07
ENSMUSP00000110396	ISVREPMQTGIKAVDSLVPIGR	M7(Oxidation); K12(ICPL:13C(6))	2493.36	1.05962	1;-;-		0	3.41769e-05	16.69	0.356791	14.99	0.529318
ENSMUSP00000110396	DNGKHALIIYDDLSKQAVAYR	K4(ICPL); K15(ICPL)	2600.28	0.973044	2;1;1	9.97243	0	2.36196e-10	40.35	0.00285536	39.39	0.0038782	52.35	0.000195296
ENSMUSP00000110396	DNGKHALIIYDDLSKQAVAYR	K4(ICPL:13C(6)); K15(ICPL:13C(6))	2612.33	0.948814	3;5;5	6.32434	0	7.41255e-11	61.84	2.38942e-05	55.07	0.000110155	82.31	2.08852e-07
ENSMUSP00000110396	FNDGTDEKKKLYCIYVAIGQKR	K8(ICPL); K9(ICPL); K10(ICPL); C13(Carbamidomethyl); K21(ICPL)	3066.46	1.0893	4;2;3	19.523	0	2.25408e-07	34.06	0.0116616	30.88	0.0228643	34.1	0.011185
ENSMUSP00000110396	FNDGTDEKKKLYCIYVAIGQKR	K8(ICPL:13C(6)); K9(ICPL:13C(6)); K10(ICPL:13C(6)); C13(Carbamidomethyl); K21(ICPL:13C(6))	3090.54	1.04907	-;2;1		0	1.49158e-07	18.53	0.578661	38.93	0.0053798	22.68	0.229292
ENSMUSP00000110396	LTELLKQGQYSPMAIEEQVAVIYAGVR	K6(ICPL)	3111.62	0.934049	2;-;-		0	7.73654e-08	42.65	0.00167593	11.98	1.98084	24.59	0.108779
ENSMUSP00000110396	LTELLKQGQYSPMAIEEQVAVIYAGVR	K6(ICPL:13C(6))	3117.64	0.93223	1;1;3	6.49407	0	1.27689e-08	34.03	0.0103981	20.46	0.229372	57.78	4.15978e-05
ENSMUSP00000110396	GYLDKLEPSKITKFENAFLSHVISQHQSLLGNIR	K10(ICPL:13C(6)); K13(ICPL:13C(6))	4105.18				0.000304	0.0054592	10.1	2.69229
ENSMUSP00000110396	GYLDKLEPSKITKFENAFLSHVISQHQSLLGNIR	K5(ICPL); K10(ICPL); K13(ICPL)	4198.15	0.90805	3;3;1	3.49652	0	7.52509e-06	30.18	0.043173	40.25	0.00450317	37.93	0.00751366
ENSMUSP00000110396	GYLDKLEPSKITKFENAFLSHVISQHQSLLGNIR	K5(ICPL:13C(6)); K10(ICPL:13C(6)); K13(ICPL:13C(6))	4216.21	0.899697	4;4;5	7.28045	0	1.4994e-11	88.78	5.01925e-08	85.63	1.09411e-07	68.63	5.68916e-06
ENSMUSP00000110396	LTDADAMKYTIVVSATASDAAPLQYLAPYSGCSMGEYFR	K8(ICPL); C32(Carbamidomethyl)	4339				0	2.29048e-06	47.98	0.000386907	35.88	0.0059392
ENSMUSP00000110396	LTDADAMKYTIVVSATASDAAPLQYLAPYSGCSMGEYFR	K8(ICPL:13C(6)); C32(Carbamidomethyl)	4345.03	1.54604	-;-;1		0	9.6836e-08	49.46	0.000291027	37.41	0.00508344	51.29	0.000212132
ENSMUSP00000110396	EPMQTGIKAVDSLVPIGR	M3(Oxidation); K8(ICPL:13C(6))	2038.07	0.965865	-;1;1		0	0.000104411			27.49	0.036717	19.16	0.251778
ENSMUSP00000110396	AMKQVAGTMKLELAQYR	M2(Oxidation); K3(ICPL:13C(6)); K10(ICPL:13C(6))	2176.11	1.72132	-;1;1		0	6.97339e-07			18.19	0.435393	30.76	0.0238826
ENSMUSP00000110396	SDGKISEQSDAKLKEIVTNFLAGFEP	K4(ICPL); K12(ICPL); K14(ICPL)	3138.51	0.938074	-;-;2		0.001523	0.0427017					15.93	0.768363
ENSMUSP00000110365	NPPGFAFVEFEDPRDAADAVR		2320.1				0.000532	0.00662235			25.28	0.0544047
ENSMUSP00000110365	AFGYYGPLR		1043.53				0.000693	0.0152401					20.73	0.111577
ENSMUSP00000110302	FHEQFIVR		1075.57				0.0042	0.106214					21.55	0.112325
ENSMUSP00000110293	IVTHAQLLEQHR		1444.8				0	1.78456e-08	22.35	0.0681061			33.22	0.00557424
ENSMUSP00000110169	IPHLSEGPKGR	K9(ICPL:13C(6))	1301.71	1.19614	-;1;1		0	0.000602743			16.78	0.352622	25.14	0.051441
ENSMUSP00000110169	LQEDMQNVLQR		1373.68				0	1.12141e-05			17.12	0.271724	43.21	0.000670929
ENSMUSP00000110169	VGNRIPHLSEGPKGR	K13(ICPL:13C(6))	1727.94	1.35953	-;-;1		0.000129	0.00308068					15.87	0.467172
ENSMUSP00000110013	VQPIKLAR	K5(ICPL)	1029.62				0.003263	0.063655	17.96	0.075979
ENSMUSP00000110013	VQPIKLAR	K5(ICPL:13C(6))	1035.64	1.0226	3;-;1	5.64454	0.000185	0.00218164	26.57	0.00517688	26.44	0.00533418	17.38	0.035648
ENSMUSP00000110013	VEFMDDTSR		1099.47				0	0.000241393	26.97	0.0053241			38.12	0.000400842
ENSMUSP00000110013	EGDVLTLLESER		1360.7				0	1.45866e-09	86.62	3.8981e-08	53.07	9.56757e-05	53.81	7.79832e-05
ENSMUSP00000110013	NVKGPVREGDVLTLLESER	K3(ICPL:13C(6))	2222.19	1.15774	1;-;-		0	0.000104073	15.04	0.590624
ENSMUSP00000109915	VIDFDENTALDDTEEGSFR		2172.96				0	2.34662e-12			88.06	1.11765e-08
ENSMUSP00000109629	NKEQEGTVVLKAR	K2(ICPL); K11(ICPL)	1681.86	0.923989	-;1;1		0	4.97908e-05			21.01	0.141461	22.54	0.100015
ENSMUSP00000109629	EIHSKQQLQKQR	K5(ICPL); K10(ICPL)	1732.89	0.854031	-;1;1		0	1.60682e-05			19.63	0.284211	21.54	0.18308
ENSMUSP00000109629	EIHSKQQLQKQR	K5(ICPL:13C(6)); K10(ICPL:13C(6))	1744.93				3.6e-05	0.000495648					20.04	0.182313
ENSMUSP00000109629	SKLQEIDVFNNQLKELR	K2(ICPL); K14(ICPL)	2284.17	1.22645	-;-;1		3.6e-05	0.00024726					11.55	2.02254
ENSMUSP00000109571	ATNLNCSVIADVR	C6(Carbamidomethyl)	1432.72				0	6.41115e-06	30.26	0.0173779	27.68	0.0320743
ENSMUSP00000109571	NAAAASAPGADKVAPGTSTRR	K12(ICPL)	2074.05				0.000262	0.00367046	15.04	0.816221
ENSMUSP00000109571	NAAAASAPGADKVAPGTSTRR	K12(ICPL:13C(6))	2080.06	1.07695	1;-;-		0.002069	0.0403028	16.08	0.662132
ENSMUSP00000109571	LGLRPVKLVR	K7(ICPL:13C(6))	1261.82	1.02743	-;1;1		0.000919	0.0141313			14.55	0.0349921	18.52	0.0140272
ENSMUSP00000109571	NAAAASAPGADKVAPGTSTR	K12(ICPL:13C(6))	1923.96				0	5.72154e-05					46.86	0.000515157
ENSMUSP00000109566	TEGISTSDIITR		1292.67				0	0.000107087	37.98	0.00298539	38.32	0.00292254	19.08	0.250279
ENSMUSP00000109566	VYADGIFDLFHSGHAR		1804.87				0	0.00018475					11.08	1.3608
ENSMUSP00000109529	TQLEENISQLR		1330.7				0	1.19149e-06	58.01	2.64068e-05	62.08	1.10261e-05	66.18	4.02454e-06
ENSMUSP00000109523	KGEFETGFEKGGQTR	K1(ICPL); K10(ICPL)	1880.85				0	2.03847e-06					17.6	0.163353
ENSMUSP00000109523	KGEFETGFEKGGQTR	K1(ICPL:13C(6)); K10(ICPL:13C(6))	1892.9	0.799728	-;-;1		0	9.02098e-06					20.56	0.128337
ENSMUSP00000109481	LGILTHLYR		1085.65				0	0.000353415	20.21	0.056215	17.05	0.133139	29.55	0.00654413
ENSMUSP00000109481	SLGLSLSGGEQEDAVR		1617.81				0	2.60266e-08	58.46	2.8726e-05
ENSMUSP00000109456	SLPDLGLR		870.505				0.000174	0.00278175	25.82	0.00877091	40.05	0.000261967	30	0.00335
ENSMUSP00000109456	FIGPSPEVVR		1100.61				0	3.26638e-06	32.94	0.00650444	40.87	0.00104763	39.61	0.00140026
ENSMUSP00000109456	FLYECPWR	C5(Carbamidomethyl)	1170.54				0	0.000128073	28.83	0.00713504	40.4	0.000497046	32.8	0.00296516
ENSMUSP00000109456	SKVLKDLPR	K2(ICPL); K5(ICPL)	1265.7	1.06265	-;-;2		0	0.000201743	35.45	0.00340697	46.77	0.000251402	35.85	0.00310719
ENSMUSP00000109456	SKVLKDLPR	K2(ICPL:13C(6)); K5(ICPL:13C(6))	1277.74	0.98522	3;3;3	0.83456	0	6.32566e-05	55.05	2.4696e-05	49.39	9.03378e-05	45.71	0.000212142
ENSMUSP00000109456	QVFFELNGQLR		1350.72				0	2.83355e-05	46.86	0.000363701	48.91	0.000222355	48.25	0.000258849
ENSMUSP00000109456	QKADEAYLIGR	K2(ICPL)	1368.69	1.01388	2;-;2	2.73057	0	0.000100791	35.93	0.00440341	38.2	0.00258062	39.49	0.00186684
ENSMUSP00000109456	QKADEAYLIGR	K2(ICPL:13C(6))	1374.71	0.934167	-;1;-		0	7.02702e-05	35.48	0.00550706	42.44	0.00109757	31.57	0.0138629
ENSMUSP00000109456	ADFAQACQDAGVR	C7(Carbamidomethyl)	1408.63				0	2.58205e-08	76.51	9.26932e-08	74.63	1.42905e-07	67.37	7.69572e-07
ENSMUSP00000109456	SLPDLGLRQENIR		1510.83				0.007207	0.189285					18.85	0.183095
ENSMUSP00000109456	VFDYSEYWEGAR		1521.66				0	1.55456e-08	97.63	5.86785e-10	97.87	5.55238e-10	96.77	8.62549e-10
ENSMUSP00000109456	NHQGLLLMDTTFR		1545.78				0	2.64204e-05	51.23	0.00010999	49.34	0.000177529	57.97	2.45765e-05
ENSMUSP00000109456	AEAEAQAEELSFPR		1547.73				0	1.18303e-11	111.95	8.32934e-11	109.41	1.59799e-10	112.2	8.43583e-11
ENSMUSP00000109456	NHQGLLLMDTTFR	M8(Oxidation)	1561.78				0	0.000138335	37.7	0.00253887	28.7	0.0203019	30.85	0.0124981
ENSMUSP00000109456	ELIPNIPFQMLLR		1583.9				0	0.000109131	26.19	0.0239234	24.39	0.0362095	29.7	0.0104473
ENSMUSP00000109456	TVAVYSEQDTGQMHR		1721.79				0	7.06399e-07	61.5	6.72548e-06	77.81	1.78823e-07	72.39	6.28675e-07
ENSMUSP00000109456	VVHSYEELEENYTR		1767.82				0	5.16217e-11	80.05	1.34937e-07	88.35	2.18595e-08	79.89	1.53335e-07
ENSMUSP00000109456	GKTLHIKALAVSDLNR	K2(ICPL); K7(ICPL)	1946.06	1.10572	2;2;1	17.2567	0	2.78479e-11	90.69	1.45027e-08	61.8	1.12318e-05	61.62	1.09496e-05
ENSMUSP00000109456	GKTLHIKALAVSDLNR	K2(ICPL:13C(6)); K7(ICPL:13C(6))	1958.1	1.02285	2;2;4	4.63525	0	9.48083e-12	66.23	3.23995e-06	67.31	2.34083e-06	80.07	1.11685e-07
ENSMUSP00000109456	LEYKPIKKVMVANR	K4(ICPL:13C(6)); K7(ICPL:13C(6)); K8(ICPL:13C(6))	2022.11	1.27925	1;-;1	3.40753	0	4.38764e-05	13.61	0.605362			25.76	0.0362354
ENSMUSP00000109456	HQKVVEIAPATHLDPQLR	K3(ICPL)	2157.15	0.94645	2;1;-	45.0338	0	6.62947e-10	55.23	5.90835e-05	24.94	0.0620413
ENSMUSP00000109456	RLEYKPIKKVMVANR	K5(ICPL); K8(ICPL); K9(ICPL)	2160.15	0.972854	2;2;2	19.9065	0	3.89621e-07	45.88	0.000601667	52.41	0.000130611	34.89	0.00733008
ENSMUSP00000109456	HQKVVEIAPATHLDPQLR	K3(ICPL:13C(6))	2163.17	1.07522	3;4;5	5.94075	0	1.44599e-10	42.88	0.000891346	45.73	0.00046243	57.33	3.18999e-05
ENSMUSP00000109456	TKYSLEYYMGLAEELVR	K2(ICPL)	2170.05	1.044	1;1;1	1.72971	0	1.3041e-11	80.35	2.05733e-07	81.2	1.66128e-07	93.54	9.89185e-09
ENSMUSP00000109456	TKYSLEYYMGLAEELVR	K2(ICPL:13C(6))	2176.07	1.08088	1;2;1	5.99024	0	2.64567e-10	62.51	1.23992e-05	75.77	5.80022e-07	67.45	4.29031e-06
ENSMUSP00000109456	RLEYKPIKKVMVANR	K5(ICPL:13C(6)); K8(ICPL:13C(6)); K9(ICPL:13C(6))	2178.21	1.14661	2;2;2	11.2023	0	9.52932e-07	26.73	0.0302562	40.48	0.00127589	27.79	0.0237868
ENSMUSP00000109456	LFLQGPKIAEEFEVELER	K7(ICPL)	2252.16				0	2.25138e-11	74.64	9.61962e-07			94.22	1.02936e-08
ENSMUSP00000109456	LFLQGPKIAEEFEVELER	K7(ICPL:13C(6))	2258.18	1.01471	4;4;2	3.17937	0	3.93452e-13	103.62	1.16449e-09	93.94	1.07975e-08	94.57	9.26968e-09
ENSMUSP00000109456	RHQKVVEIAPATHLDPQLR	K4(ICPL:13C(6))	2319.28	1.09422	2;4;4	4.79017	0	4.35495e-12	50.92	0.000122578	53.07	6.90443e-05	60.19	1.34486e-05
ENSMUSP00000109456	HIEVQILGDQYGNILHLYER		2410.25				0	2.38098e-14	51.52	0.00020119	66.87	5.81817e-06	60.41	2.5796e-05
ENSMUSP00000109456	SVVEFLQGYIGIPHGGFPEPFR		2446.25				0	8.97398e-10	77.7	4.85698e-07	78.91	3.64379e-07	52.36	0.000160291
ENSMUSP00000109456	AYSEALAAFGNGALFVEKFIEKPR	K18(ICPL:13C(6)); K22(ICPL:13C(6))	2850.47	1.0724	1;3;1	15.0469	0	1.26757e-10	15.05	0.970648	45.03	0.000982979	43.3	0.00145232
ENSMUSP00000109456	IEGRPGASLPPLNLKELEKDLIDR	K15(ICPL); K19(ICPL)	2883.54	1.10145	1;-;2	10.7097	0	2.08694e-09	65.31	8.87743e-06	43.01	0.0015076	71.87	1.97639e-06
ENSMUSP00000109456	IEGRPGASLPPLNLKELEKDLIDR	K15(ICPL:13C(6)); K19(ICPL:13C(6))	2895.58	1.08395	2;1;1	3.57419	0	4.12346e-11	77.8	2.88768e-07	71.55	1.19323e-06	73.07	8.60588e-07
ENSMUSP00000109456	LQVEHTVTEEITDVDLVHAQIHVSEGR		3054.55				0	8.30476e-14	94.1	1.40834e-08	68.34	5.2833e-06	95.71	9.68067e-09
ENSMUSP00000109456	AGTHILCIKDMAGLLKPAACTMLVSSLR	C7(Carbamidomethyl); K9(ICPL); K16(ICPL); C20(Carbamidomethyl)	3237.64	0.957368	2;-;1	19.3658	0	6.06375e-06	33.71	0.0156407	35.62	0.00976	39.34	0.00424324
ENSMUSP00000109456	AGTHILCIKDMAGLLKPAACTMLVSSLR	C7(Carbamidomethyl); K9(ICPL:13C(6)); K16(ICPL:13C(6)); C20(Carbamidomethyl)	3249.68	1.10216	1;4;2	4.13604	0	5.42793e-07	31.7	0.0184909	49.41	0.000317307	47.89	0.000451903
ENSMUSP00000109456	GANAVGYTNYPDNVVFKFCEVAKENGMDVFR	K17(ICPL:13C(6)); C19(Carbamidomethyl); K23(ICPL:13C(6))	3733.72	1.15811	1;1;1	4.14218	0	3.04038e-07	39.47	0.00289228	59.01	3.21544e-05	56.74	5.44419e-05
ENSMUSP00000109456	GLAPVQAYLHIPDIIKVAKENGVDAVHPGYGFLSER	K16(ICPL); K19(ICPL)	4084.1	1.00716	1;1;1	8.0422	0	2.34817e-07	32.23	0.0238467	45.99	0.00109771	30.2	0.0394412
ENSMUSP00000109456	GLAPVQAYLHIPDIIKVAKENGVDAVHPGYGFLSER	K16(ICPL:13C(6)); K19(ICPL:13C(6))	4096.15	0.990555	-;1;2		0	3.3763e-10	33.33	0.0173032	35.27	0.0100442	52.48	0.000178803
ENSMUSP00000109456	HGEEVTPEDVLSAAMYPDVFAQFKDFTATFGPLDSLNTR	K24(ICPL:13C(6))	4427.09	2.76265	-;1;-		0	1.31782e-07	45.07	0.00104865	31.76	0.022338
ENSMUSP00000109456	LDNASAFQGAVISPHYDSLLVKVIAHGKDHPTAATKMSR	K22(ICPL); K28(ICPL); K36(ICPL)	4461.2	1.12429	1;1;-	0.183182	0	4.18813e-06	36.95	0.011434	32.58	0.0293429	16.57	1.21712
ENSMUSP00000109456	LDNASAFQGAVISPHYDSLLVKVIAHGKDHPTAATKMSR	K22(ICPL:13C(6)); K28(ICPL:13C(6)); K36(ICPL:13C(6))	4479.29	1.17054	-;1;1		0	1.16512e-05	25.82	0.112058	28.7	0.0586124	28.04	0.0667404
ENSMUSP00000109456	LDNASAFQGAVISPHYDSLLVKVIAHGKDHPTAATKMSR	K22(ICPL:13C(6)); K28(ICPL:13C(6)); K36(ICPL:13C(6)); M37(Oxidation)	4495.27	1.21131	1;-;-		0	2.20429e-06	12.86	2.55957	30.92	0.0402525
ENSMUSP00000109456	ELIPNIPFQMLLR	M10(Oxidation)	1599.89				0.001269	0.0233928			18.38	0.180062	13	0.634002
ENSMUSP00000109456	AYSEALAAFGNGALFVEKFIEKPR	K18(ICPL); K22(ICPL)	2838.43	1.02759	-;-;1		0	2.75559e-07			20.34	0.349074	33.84	0.0155512
ENSMUSP00000109456	GANAVGYTNYPDNVVFKFCEVAKENGMDVFR	K17(ICPL); C19(Carbamidomethyl); K23(ICPL)	3721.69				0	2.11664e-08			57.38	2.48622e-05
ENSMUSP00000109456	VFDSLNYLPNMLLGMEAAGSAGGVVEAAISYTGDVADPSR	M11(Oxidation)	4073.95				0	4.65009e-05			39.04	0.00488351
ENSMUSP00000109456	HGEEVTPEDVLSAAMYPDVFAQFKDFTATFGPLDSLNTR	K24(ICPL)	4421.07				0	2.58068e-05			31.52	0.0237129
ENSMUSP00000109456	AQKLLHYLGHVMVNGPTTPIPVNVSPSPVDPAVPVVPIGPPPAGFR	K3(ICPL:13C(6))	4843.62	1.03047	-;1;1		0	7.49516e-05			38.98	0.0017896	10.7	1.1235
ENSMUSP00000109456	SFQPDTGRIEVFR		1551.79				0.00366	0.0951493					14.44	0.600781
ENSMUSP00000109456	RLEYKPIKKVMVANR	K5(ICPL:13C(6)); K8(ICPL:13C(6)); K9(ICPL:13C(6)); M11(Oxidation)	2194.21	0.832858	-;-;1		3.6e-05	0.000665091					14.12	0.507308
ENSMUSP00000109456	RHQKVVEIAPATHLDPQLR	K4(ICPL)	2313.26				6.7e-05	0.00115831					18.91	0.242919
ENSMUSP00000109456	LTSDSVKLAKQVGYENAGTVEFLVDKHGKHYFIEVNSR	K7(ICPL:13C(6)); K10(ICPL:13C(6)); K26(ICPL:13C(6)); K29(ICPL:13C(6))	4723.37	1.06381	-;-;1		0	0.000180007					12.3	3.34758
ENSMUSP00000109455	DVGGEGVQQGLLKLLEGTIVNVPEKNSR	K13(ICPL); K25(ICPL)	3159.64				0	8.34164e-05					18.86	0.420605
ENSMUSP00000109455	DVGGEGVQQGLLKLLEGTIVNVPEKNSR	K13(ICPL:13C(6)); K25(ICPL:13C(6))	3171.68	0.857949	-;-;1		0	0.000127496					21.3	0.19793
ENSMUSP00000109450	ASHTAPQVLFSHR		1450.75				0	4.94547e-08	49.11	0.000215416	40.09	0.001719	49.94	0.000178448
ENSMUSP00000109450	AKTSDFLKVLNR	K2(ICPL:13C(6)); K8(ICPL:13C(6))	1613.88	0.636088	-;-;1		0	7.18266e-06					13.68	0.679249
ENSMUSP00000109319;ENSMUSP00000030184;ENSMUSP00000029549	IQLVEEELDR		1243.65				0	3.53756e-06	32.87	0.008934	23.76	0.0727857	41.91	0.00111441
ENSMUSP00000109319;ENSMUSP00000030184;ENSMUSP00000029549	RIQLVEEELDR		1399.75				0	1.81441e-05	18.85	0.301683	32.14	0.0141433	25.01	0.0730384
ENSMUSP00000109319;ENSMUSP00000030184;ENSMUSP00000029549	IQLVEEELDRAQER		1727.89				0.000472	0.0127597	25.16	0.0690348	24.19	0.0855493	24.16	0.087869
ENSMUSP00000109319;ENSMUSP00000030184;ENSMUSP00000029549	LATALQKLEEAEKAADESER	K7(ICPL); K13(ICPL)	2412.17				0	6.77956e-07	77.56	5.02487e-07	80.07	2.83887e-07	62.5	1.57737e-05
ENSMUSP00000109319;ENSMUSP00000030184;ENSMUSP00000029549	LATALQKLEEAEKAADESER	K7(ICPL:13C(6)); K13(ICPL:13C(6))	2424.21				0	1.43693e-07	60.7	2.17891e-05	90.94	2.06177e-08	87.47	4.55709e-08
ENSMUSP00000109319	KLVIIESDLER	K1(ICPL)	1419.79	0.140241	2;1;2	13.3957	0	2.15295e-07	46.67	0.000288473	36.06	0.00390194	53.02	6.68505e-05
ENSMUSP00000109319	ETAEADVASLNRR		1431.72				0.002173	0.0442793	27.57	0.0352594			10.71	1.76205
ENSMUSP00000109319	KLVIIESDLERAEER	K1(ICPL)	1905.01	0.162074	2;2;2	9.15826	9.8e-05	0.00206251	19.13	0.276127	33.51	0.0102724	31.58	0.015638
ENSMUSP00000109319	ETAEADVASLNR		1275.62				0	0.000149484			43.5	0.000600789	13.09	0.66518
ENSMUSP00000109319	AQKDEEKMEIQEIQLKEAKHIAEDADR	K3(ICPL); K7(ICPL); K16(ICPL); K19(ICPL)	3615.68	0.149762	-;-;1		0	8.39067e-11			27.8	0.0452237	59.56	2.86062e-05
ENSMUSP00000109319	AQKDEEKMEIQEIQLKEAKHIAEDADR	K3(ICPL:13C(6)); K7(ICPL:13C(6)); K16(ICPL:13C(6)); K19(ICPL:13C(6))	3639.76	0.155109	-;1;-		0	7.30187e-08			36.28	0.00969103	33.8	0.01705
ENSMUSP00000109319	KLVIIESDLER	K1(ICPL:13C(6))	1425.81				6.7e-05	0.00155203					13.55	0.461441
ENSMUSP00000109312	AMDLVQEEFLQR		1478.73				0	2.74786e-07	62.37	8.16994e-06	54.31	5.41194e-05	68.63	1.95351e-06
ENSMUSP00000109312	VQCVPKEPHSFQSR	C3(Carbamidomethyl); K6(ICPL)	1803.86	1.12514	1;-;-		0.001574	0.0285879	12.98	0.644481
ENSMUSP00000109312	ATLAQRPAPVPLANAVVQ		1816.04				0	3.67744e-05	19.12	0.0826616	45.2	0.000206867	56.64	1.48488e-05
ENSMUSP00000109312	YAMTTTLSAR		1114.56				6.7e-05	0.00164331			14.4	0.388494	26.33	0.0228153
ENSMUSP00000109312	LNFYQHSWLPAR		1531.78				0	2.14231e-05			17.78	0.251754	36.4	0.00367684
ENSMUSP00000109312	TRDPEKLASCDIVVDVGGEYNPQSHR	K6(ICPL:13C(6)); C10(Carbamidomethyl)	3053.44				0.000133	0.00254478			18.29	0.310588
ENSMUSP00000109312	LNPTWNQPNQDTEAGFR		1987.93				0	2.09342e-09					50.23	0.00012282
ENSMUSP00000109247	GFQFVSSSLPDICYR	C13(Carbamidomethyl)	1775.84				0	6.03323e-07	50.15	0.000136213			22.92	0.071726
ENSMUSP00000109247	GGHIAKDCKEPKR	K6(ICPL); C8(Carbamidomethyl); K9(ICPL); K12(ICPL)	1810.84	0.959986	3;2;2	20.2231	0	6.09996e-08	20.93	0.0932356	38.38	0.00172801	29.46	0.0131358
ENSMUSP00000109247	EQCCYNCGKPGHLAR	C3(Carbamidomethyl); C4(Carbamidomethyl); C7(Carbamidomethyl); K9(ICPL)	1954.81	0.947071	3;1;1	17.511	0	2.58365e-05	28.82	0.00229635	18.58	0.0208013	11.63	0.123672
ENSMUSP00000109247	EQCCYNCGKPGHLAR	C3(Carbamidomethyl); C4(Carbamidomethyl); C7(Carbamidomethyl); K9(ICPL:13C(6))	1960.83	0.93349	1;1;3	7.6736	0	8.36271e-06	19.56	0.0199192	24.96	0.00574477	58.28	2.74898e-06
ENSMUSP00000109247	GGHIAKDCKEPKRER	K6(ICPL); C8(Carbamidomethyl); K9(ICPL); K12(ICPL)	2095.99	1.03164	1;1;2	23.6394	0	0.000322034	15.3	0.572535	16.32	0.470192	20.31	0.184825
ENSMUSP00000109247	GGHIAKDCKEPKRER	K6(ICPL:13C(6)); C8(Carbamidomethyl); K9(ICPL:13C(6)); K12(ICPL:13C(6))	2114.05	0.965379	3;2;1	12.0791	0.000129	0.00282225	18.74	0.361549	15.84	0.702358	16.82	0.569837
ENSMUSP00000109247	GGHIAKDCKEPKR	K6(ICPL:13C(6)); C8(Carbamidomethyl); K9(ICPL:13C(6)); K12(ICPL:13C(6))	1828.9	1.26549	-;2;1		0	1.77344e-06			57.66	3.5736e-05	33.18	0.0104583
ENSMUSP00000109237	ILHLLGQEGPKTNNPSKYIR	K11(ICPL:13C(6)); K17(ICPL:13C(6))	2500.35	1.23413	-;-;1		0	5.77531e-08					38.31	0.00265627
ENSMUSP00000109212	SQDKTLKMYEGAYHVLHR	K4(ICPL:13C(6)); K7(ICPL:13C(6))	2398.18	1.5706	-;-;1		0	3.46694e-07					31.85	0.018255
ENSMUSP00000109212	TPQNVPYQDLPHLVNADGQYLFCR	C23(Carbamidomethyl)	2845.37				0	8.66839e-06					30.06	0.0285528
ENSMUSP00000109126	SVMQEGAAPLPR		1255.64				0.003469	0.0627054			12.32	0.949544
ENSMUSP00000109126	FRAEEDIDPNSVHSVPR		1967.95				0	9.13632e-06			28.35	0.032241
ENSMUSP00000109110	AGGGSIEVSVPR		1128.6				0.003959	0.0728289			13.65	0.78105
ENSMUSP00000109110	IINELILTAQER		1412.81				9.3e-05	0.000758335			23.84	0.0299459
ENSMUSP00000108902	GETSGRVDDNEETIKKR	K15(ICPL); K16(ICPL)	2144				0	8.95348e-07	25.82	0.04464	31.76	0.0117358	31.11	0.0126625
ENSMUSP00000108902	LETYYNATEPVISFYDKR	K17(ICPL)	2314.1	0.0379998	-;1;-		0	8.71365e-09	38.26	0.00364988	22.19	0.151893	47.82	0.000414642
ENSMUSP00000108902	GKKLSAIMEKGELVPLDTVLDMLR	K2(ICPL); K3(ICPL); K10(ICPL)	2971.54				0	2.95906e-09	11.04	2.38868			34.35	0.0113307
ENSMUSP00000108752	ILIAKPIMFR	K5(ICPL:13C(6))	1312.79	1.83842	-;-;1		0	1.58081e-06					32.74	0.00263394
ENSMUSP00000108658	VQVSESGVHRPHVAGIHGR		2022.07				0.000857	0.012012			22.17	0.135909
ENSMUSP00000108522	HITGLCGKKQR	C6(Carbamidomethyl); K8(ICPL:13C(6)); K9(ICPL:13C(6))	1519.8	1.12129	1;1;1	14.9503	0	0.000584319	22.76	0.0815682	18.48	0.207182	13.48	0.646193
ENSMUSP00000108422	LWPVLEPEEVAR		1437.77				0.002987	0.057112	15.01	0.452743
ENSMUSP00000108422	KSVTGQTVLITGAGHGIGR	K1(ICPL)	1957.06	0.607758	-;1;2		0	3.86877e-10	79.74	1.47576e-07	40.95	0.00106065	48.85	0.000177882
ENSMUSP00000108422	AEIYNSVDQVKR	K11(ICPL)	1526.76	0.572619	-;1;2		0	0.000318994			65.24	1.07722e-05	27.65	0.0644216
ENSMUSP00000108422	KSVTGQTVLITGAGHGIGR	K1(ICPL:13C(6))	1963.08	0.532576	-;1;1		0	8.80409e-08			55.35	3.42798e-05	54.29	4.2825e-05
ENSMUSP00000108241	KHTEKHASSGSTVHIHPQAAPVVCR	K1(ICPL:13C(6)); K5(ICPL:13C(6)); C24(Carbamidomethyl)	2956.48	0.948392	1;-;-		0	2.28312e-05	22.87	0.174807			18.21	0.503612
ENSMUSP00000108126	AKSQTDKLAKVYQPKR	K2(ICPL:13C(6)); K7(ICPL:13C(6)); K10(ICPL:13C(6)); K15(ICPL:13C(6))	2305.23	1.46363	-;-;1		0	7.59884e-06					21.56	0.166878
ENSMUSP00000108049	DPQLSPEQHPSSLSER		1806.86				0.005882	0.115107			11.2	1.07718
ENSMUSP00000108049	RAPLPPMPTSQGAAQGQER		1992.01				0	5.22959e-05			36.06	0.00637936
ENSMUSP00000108049	STEGQGPYHPVVGHIGNEDR		2149				0	7.22461e-06			26.35	0.0376577
ENSMUSP00000108003	HGLYEKKKTSR	K6(ICPL); K7(ICPL); K8(ICPL)	1661.82	0.963965	2;1;2	7.94961	0	1.0226e-06	36.53	0.00439104	38.57	0.00265481	38.84	0.00236417
ENSMUSP00000108003	HGLYEKKKTSR	K6(ICPL:13C(6)); K7(ICPL:13C(6)); K8(ICPL:13C(6))	1679.88	0.985645	3;3;2	3.95958	0	6.635e-05	35.38	0.00589609	39.18	0.00227069	46.61	0.000417993
ENSMUSP00000108003	GTAKANVGAGKKPKE	K4(ICPL); K11(ICPL); K12(ICPL); K14(ICPL)	1875.91	0.927155	2;1;1	8.88956	0	0.000127908	30.59	0.0184633	25.09	0.0655104	36.49	0.00471215
ENSMUSP00000108003	GTAKANVGAGKKPKE	K4(ICPL:13C(6)); K11(ICPL:13C(6)); K12(ICPL:13C(6)); K14(ICPL:13C(6))	1899.99	0.941685	1;1;1	13.9299	0	3.73044e-05	33.72	0.0103395	37.09	0.00478813	39.89	0.00256413
ENSMUSP00000108003	KQMVIDVLHPGKATVPKTEIR	K1(ICPL); K12(ICPL); K17(ICPL)	2675.42	1.0337	1;1;1	4.71707	0	4.09333e-09	33.84	0.0119784	39.13	0.00364096	46.27	0.000699882
ENSMUSP00000108003	KQMVIDVLHPGKATVPKTEIR	K1(ICPL); M3(Oxidation); K12(ICPL); K17(ICPL)	2691.41	1.04005	-;1;1		0	3.11953e-06	10.76	2.52677	18.73	0.424678	19.71	0.34477
ENSMUSP00000108003	KQMVIDVLHPGKATVPKTEIR	K1(ICPL:13C(6)); K12(ICPL:13C(6)); K17(ICPL:13C(6))	2693.48	1.03189	1;1;2	3.36176	0	1.17425e-08	23.33	0.076645	32.71	0.00892101	42.46	0.000927935
ENSMUSP00000108003	EKLAKMYKTTPDVIFVFGFR	K2(ICPL); K5(ICPL); K8(ICPL)	2705.36	0.829837	1;-;1	9.15265	0	0.000293256	24.3	0.117405	20.03	0.316804	22.17	0.207807
ENSMUSP00000108003	KQMVIDVLHPGKATVPKTEIR	K1(ICPL:13C(6)); M3(Oxidation); K12(ICPL:13C(6)); K17(ICPL:13C(6))	2709.47	1.25486	-;1;-		0	1.12901e-05	15.01	0.646776	22.7	0.101768
ENSMUSP00000108003	EKLAKMYKTTPDVIFVFGFR	K2(ICPL:13C(6)); K5(ICPL:13C(6)); K8(ICPL:13C(6))	2723.42	1.06863	-;1;1		0	2.68632e-05	21.55	0.231298	25.92	0.083282	41.4	0.00238702
ENSMUSP00000108003	THFGGGKTTGFGMIYDSLDYAKKNEPKHR	K7(ICPL); K22(ICPL); K23(ICPL); K27(ICPL)	3675.69	1.03018	4;2;3	10.8743	0	1.23843e-12	44.54	0.000689058	44.98	0.000624256	65.81	5.36653e-06
ENSMUSP00000108003	THFGGGKTTGFGMIYDSLDYAKKNEPKHR	K7(ICPL); M13(Oxidation); K22(ICPL); K23(ICPL); K27(ICPL)	3691.68	1.36033	1;1;-	7.58067	0	8.44653e-06	15.52	0.482535	10.11	1.69648	22.38	0.0875816
ENSMUSP00000108003	THFGGGKTTGFGMIYDSLDYAKKNEPKHR	K7(ICPL:13C(6)); M13(Oxidation); K22(ICPL:13C(6)); K23(ICPL:13C(6)); K27(ICPL:13C(6))	3715.77	0.958992	-;1;1		0	3.05425e-07	33.09	0.0157091	55.14	0.000109312	41.64	0.00235465
ENSMUSP00000108003	THFGGGKTTGFGMIYDSLDYAKKNEPKHR	K7(ICPL:13C(6)); K22(ICPL:13C(6)); K23(ICPL:13C(6)); K27(ICPL:13C(6))	3699.77	1.088	-;1;2		0	4.38388e-12			51.08	0.000265142	86.48	7.5006e-08
ENSMUSP00000108003	EKLAKMYKTTPDVIFVFGFR	K2(ICPL:13C(6)); K5(ICPL:13C(6)); M6(Oxidation); K8(ICPL:13C(6))	2739.42	1.62513	-;-;1		0	9.9254e-06					24.19	0.127467
ENSMUSP00000107954	QRQEELCLER	C7(Carbamidomethyl)	1360.66				0.000247	0.00366888	11.67	0.844154	16.54	0.275056	16.55	0.264465
ENSMUSP00000107954	LQNLDGTCADSYSFVFSR	C8(Carbamidomethyl)	2079.95				0	1.53919e-12	76.73	2.07016e-07	95.23	2.99916e-09	119.93	9.45111e-12
ENSMUSP00000107927	SCGSLLPELSLAER	C2(Carbamidomethyl)	1531.78				0	4.70723e-07	38.43	0.00229678	12.93	0.76909	28.81	0.0205175
ENSMUSP00000107927	AALDLKQVPSQIAVTR	K6(ICPL:13C(6))	1821.03	1.21191	1;1;1	7.9261	0	1.73659e-06	20.46	0.0733091	38.49	0.00115387	14.27	0.297418
ENSMUSP00000107927	HDNAEDAWNLKQEVDR	K11(ICPL:13C(6))	2050.93	1.17406	1;-;-		0	1.26903e-05	16.84	0.198734
ENSMUSP00000107927	VFESTCSSGSPGSNQALLLLR	C6(Carbamidomethyl)	2223.11				0	1.74352e-12	98.12	3.66154e-09	70.32	2.06231e-06	81.25	1.78475e-07
ENSMUSP00000107927	LDASAILDTAKYVALVKVLGKHSR	K11(ICPL); K17(ICPL); K21(ICPL)	2883.55	1.15384	1;1;-	7.45534	0	1.80722e-06	27.14	0.0502312	13.3	1.22547
ENSMUSP00000107927	LDASAILDTAKYVALVKVLGKHSR	K11(ICPL:13C(6)); K17(ICPL:13C(6)); K21(ICPL:13C(6))	2901.61	1.36003	-;-;1		0	5.86857e-08	15.29	0.281011			30.6	0.00857899
ENSMUSP00000107927	TSQKPKKAPVLKTLLELIPELR	K4(ICPL); K6(ICPL); K7(ICPL); K12(ICPL)	2922.63	0.950557	1;-;-		0	1.88154e-05	16.07	0.252116			15.74	0.28002
ENSMUSP00000107927	TSQKPKKAPVLKTLLELIPELR	K4(ICPL:13C(6)); K6(ICPL:13C(6)); K7(ICPL:13C(6)); K12(ICPL:13C(6))	2946.7				3.6e-05	0.000304341	10.97	0.247949	18.95	0.0337478	24.18	0.00763889
ENSMUSP00000107927	MANQFALYKPVTDLFLQLVDSGKVDEAR	K9(ICPL:13C(6)); K23(ICPL:13C(6))	3390.73				0	4.07716e-07	32.63	0.0232766	12.25	2.50178
ENSMUSP00000107927	RDYLKGALATLR	K5(ICPL:13C(6))	1487.84	1.0774	-;1;-		0	0.000411263			14.54	0.369138
ENSMUSP00000107927	ADAAWTKMQEENIIPR	K7(ICPL:13C(6))	1983.97	1.05208	-;-;1		0	6.25969e-07					20.43	0.184769
ENSMUSP00000107927	KVIEEQMEPALEKLSIMSER	K1(ICPL:13C(6)); K13(ICPL:13C(6))	2582.31	1.22047	-;-;1		0	1.00508e-07					33	0.0184938
ENSMUSP00000107923	DSELDKHLESR	K6(ICPL)	1433.66				0.001252	0.021168	10.37	0.652016
ENSMUSP00000107923	DSELDKHLESR	K6(ICPL:13C(6))	1439.69	0.842674	1;-;-		0	0.000425269	23.31	0.042466
ENSMUSP00000107923	AADKSGSALEPSVESVKTGIR	K4(ICPL:13C(6)); K17(ICPL:13C(6))	2324.19				0	0.000100907			30.13	0.0297947
ENSMUSP00000107760	FCQEFQHYPAMGGVAPQALAVAASGPGSSFR	C2(Carbamidomethyl)	3238.52				0	1.34949e-08	42.08	0.00124817	53.37	0.00010816	49.98	0.000218504
ENSMUSP00000107760	APSAEVEMTAYVLLAYLTSESSRPTR		2842.44				9.3e-05	0.000919772			30.34	0.0325494	31.67	0.0240652
ENSMUSP00000107653	AVDDFNQQSLDTNLYR		1898.89				0	3.61532e-11			72.91	7.70081e-07	102.33	8.80109e-10
ENSMUSP00000107592	RGEEGHDPKEPEQLR	K9(ICPL)	1881.88	0.91491	1;-;2	1.98477	0	2.02613e-05	22.76	0.0664728	30.35	0.0120396	50.8	0.000104386
ENSMUSP00000107592	RGEEGHDPKEPEQLR	K9(ICPL:13C(6))	1887.9	1.18992	1;5;4	17.2932	0	3.92531e-05	25.38	0.0420115	33.69	0.00662722	29.56	0.0184806
ENSMUSP00000107529	LGIPATIVVPNTTPALTIER		2076.21				0	6.0914e-06	18.81	0.0664189	23.43	0.0229241	29.14	0.0061559
ENSMUSP00000107529	HFVCSSAGNAGMATAYAAR	C4(Carbamidomethyl)	1941.87				0	9.81844e-13			66.82	1.54937e-06
ENSMUSP00000107299	YRPSMEGYR		1158.54				3.6e-05	0.000444147	16.26	0.164431	17.51	0.123306	18.51	0.115562
ENSMUSP00000107299	FHPEPYGLEDDQR		1602.72				9.3e-05	0.00146367	14.1	0.264551	17.62	0.118492	15.43	0.201925
ENSMUSP00000107299	APSRQDVYGPQPQVR		1697.87				0	0.000377294	29.05	0.0243303	15.02	0.594924	15.17	0.596013
ENSMUSP00000107299	HYEDGYPGGSDNYGSLSR		1973.83				0	2.14252e-08	31.09	0.00198399	17.91	0.0428791	63.27	1.27164e-06
ENSMUSP00000107299	LDAVKSNAAAYLQHLCYR	K5(ICPL:13C(6)); C16(Carbamidomethyl)	2204.1	0.872589	1;1;-	19.1752	0	3.45059e-07	31.69	0.0195161	40.33	0.00264146
ENSMUSP00000107299	HIEWESVLTNTAGCLR	C14(Carbamidomethyl)	1885.92				0	9.71423e-05			11.25	1.62352	19.51	0.240679
ENSMUSP00000107299	SQSSHSYDDSTLPLIDR		1920.89				9.3e-05	0.00134391			16.5	0.272005	11.03	0.919022
ENSMUSP00000107299	SALRQEKALSAIAELLTSEHER	K7(ICPL:13C(6))	2563.36	0.721915	-;1;-		0.001376	0.0245417			19.33	0.324956
ENSMUSP00000107299	KLKGIPILVGLLDHPKKEVHLGACGALKNISFGR	K1(ICPL); K3(ICPL); K16(ICPL); K17(ICPL); C24(Carbamidomethyl); K28(ICPL)	4204.25				0	0.000108381			13.08	1.15383
ENSMUSP00000107299	KLKGIPILVGLLDHPKKEVHLGACGALKNISFGR	K1(ICPL:13C(6)); K3(ICPL:13C(6)); K16(ICPL:13C(6)); K17(ICPL:13C(6)); C24(Carbamidomethyl); K28(ICPL:13C(6))	4234.35				0	5.21032e-05			12.1	0.521023
ENSMUSP00000107299	KGMPPPSNWR	K1(ICPL)	1274.61				0.000693	0.0162827					10.07	1.25461
ENSMUSP00000107285	HLADHGLLSGVQR		1402.76				0	4.63115e-10	20.18	0.161659	27.03	0.0356675	59.26	1.93873e-05
ENSMUSP00000107237	MIAGQVLDINLAAEPKVNR	K16(ICPL)	2157.15	0.852934	1;-;-		0	0.000119702	26.56	0.0479137	10.43	1.96544
ENSMUSP00000107237	MIAGQVLDINLAAEPKVNR	K16(ICPL:13C(6))	2163.17	0.992787	-;2;-		0	4.72463e-08	16.48	0.395834	33.48	0.00785304
ENSMUSP00000107151	SPQHFHRPDQGINIYR		1964.98				6.7e-05	0.000948462	13.48	1.12635	24.71	0.0843472	16.41	0.569114
ENSMUSP00000107068	VDILDPALLR		1124.67				0	0.000169699	32.06	0.00345377	26.61	0.012769	20.41	0.0505002
ENSMUSP00000107068	KGKCAVIKTSTR	K1(ICPL); K3(ICPL); C4(Carbamidomethyl); K8(ICPL)	1663.84	1.05014	1;-;-		0	0.000299638	22.04	0.131599			21.53	0.148348
ENSMUSP00000107068	KGKCAVIKTSTR	K1(ICPL:13C(6)); K3(ICPL:13C(6)); C4(Carbamidomethyl); K8(ICPL:13C(6))	1681.9	1.02698	1;1;3	4.7787	0	2.1693e-09	22.64	0.0971937	14.26	0.695575	66.46	4.25904e-06
ENSMUSP00000107068	DAFALAKEKAPSIIFIDELDAIGTKR	K7(ICPL); K9(ICPL); K25(ICPL)	3147.61	0.956241	1;2;2	7.9557	0	8.41469e-08	31.36	0.0266866	29.64	0.0403064	37.4	0.00681478
ENSMUSP00000107068	DAFALAKEKAPSIIFIDELDAIGTKR	K7(ICPL:13C(6)); K9(ICPL:13C(6)); K25(ICPL:13C(6))	3165.68	1.00663	2;-;1	1.06048	0	1.4982e-10	27.44	0.0421906	19.4	0.263501	31.69	0.0159585
ENSMUSP00000107068	KMNVSPDVNYEELAR	K1(ICPL:13C(6))	1875.9	0.895654	-;1;1		0	1.72457e-07			22.97	0.0809981	30.99	0.0143707
ENSMUSP00000107068	TMLELLNQLDGFQPNTQVKVIAATNR	K19(ICPL:13C(6))	3025.59	0.965862	-;-;1		0.000247	0.00400512					14.29	1.18793
ENSMUSP00000106967	NPDSSTTGPWCYTTDPTVR	C11(Carbamidomethyl)	2154.94				0	2.42321e-12	75.71	1.46351e-07	76.64	1.06218e-07	80.13	5.28928e-08
ENSMUSP00000106967	NVEKISMLEKIYVHPR	K4(ICPL); K10(ICPL)	2166.12	0.991531	1;1;-	2.94658	0	2.96645e-07	14.45	0.931402	32.03	0.0162293
ENSMUSP00000106967	KGKYGFYTHVFR	K1(ICPL:13C(6)); K3(ICPL:13C(6))	1724.87	0.810965	-;1;1		0	2.21911e-07			24.24	0.0843817	41.55	0.00151166
ENSMUSP00000106967	KSPQELLCGASLISDR	K1(ICPL); C8(Carbamidomethyl)	1878.94	0.821234	-;1;-		0	0.000542242			16.67	0.466077
ENSMUSP00000106967	KSPQELLCGASLISDR	K1(ICPL:13C(6)); C8(Carbamidomethyl)	1884.96	1.26313	-;-;1		0	1.49788e-09					41.42	0.00168739
ENSMUSP00000106957	GRGHEVKLVSR	K7(ICPL:13C(6))	1348.75	1.01559	-;-;1		0.000129	0.00292828					33.31	0.00447993
ENSMUSP00000106920	QHLPVFQHR		1161.63				0.000213	0.00387306	24.42	0.0395744	22.17	0.0618871	11.4	0.767902
ENSMUSP00000106920	IDLHFLQQMR		1300.68				0.000829	0.0224996	27.69	0.0329368	16.44	0.436949	21.34	0.142496
ENSMUSP00000106920	RPDLYGSLGHPLS		1411.73				0.000213	0.00371518	23.46	0.0915158	27.04	0.0386498	44.79	0.000650513
ENSMUSP00000106920	AIESQCYVIAAAQCGR	C6(Carbamidomethyl); C14(Carbamidomethyl)	1796.84				0	6.61143e-10	73.36	5.8818e-07	40.7	0.00109797	67.89	2.07257e-06
ENSMUSP00000106920	LGACLAFLPEAFDFIAR	C4(Carbamidomethyl)	1910.99				0	1.62098e-05	17.96	0.375096	18.66	0.33015	19.48	0.271655
ENSMUSP00000106920	ASYGHSMVVDPWGTVVAR		1931.94				0	1.33255e-09	15.68	0.531328	30.26	0.0170011	45.07	0.000594338
ENSMUSP00000106859	TLMNLGGLAVAR		1215.69				0	3.52887e-05	24.18	0.0376215	20.1	0.0962579	54.28	3.63919e-05
ENSMUSP00000106859	GASQAGMTGYGMPR		1383.61				6.7e-05	0.00160429	31.92	0.00321344	23.27	0.0240198	19.27	0.0591521
ENSMUSP00000106859	DDGLFSGDPNWFPKKSKENPR	K14(ICPL); K15(ICPL); K17(ICPL)	2749.24				0	1.23187e-05	24.27	0.050692	15.27	0.380373	26.05	0.0316599
ENSMUSP00000106859	DDGLFSGDPNWFPKKSKENPR	K14(ICPL:13C(6)); K15(ICPL:13C(6)); K17(ICPL:13C(6))	2767.3	0.922127	1;1;1	17.6751	0	9.30119e-07	27.31	0.0377134	21.23	0.163478	32.9	0.0115907
ENSMUSP00000106859	YGINTTDIFQTVDLWEGKNMACVQR	K18(ICPL:13C(6)); C22(Carbamidomethyl)	3070.45	1.06186	1;-;-		0	9.33305e-08	37.13	0.00469582			34.48	0.00844789
ENSMUSP00000106859	YGINTTDIFQTVDLWEGKNMACVQR	K18(ICPL); C22(Carbamidomethyl)	3064.45	1.12308	-;-;1		0	4.63678e-07					57.49	3.93906e-05
ENSMUSP00000106847	QFLLTNLVEVGGR		1445.81				0.000616	0.0114557	18.78	0.211895
ENSMUSP00000106847	KLADKQLSSVVKEAGIR	K1(ICPL); K5(ICPL); K12(ICPL)	2157.15	0.825422	1;-;-		0	2.2903e-07	37.46	0.00392149
ENSMUSP00000106726	LKEYEKALKYVR	K2(ICPL); K6(ICPL); K9(ICPL)	1854.95				0	2.43368e-06	21.13	0.167286
ENSMUSP00000106726	GLLQTEPQNNQAKELER	K13(ICPL:13C(6))	2079.05	0.997485	-;1;1		0	4.91102e-09			10.25	2.35071	75.99	6.40749e-07
ENSMUSP00000106601	RPYWCISR	C5(Carbamidomethyl)	1137.56				0.00388	0.0757385	18.08	0.18905
ENSMUSP00000106601	TALAEAELEYNPEHVSR		1928.93				0	3.88209e-05	33.68	0.00696391	16.76	0.343706	15.81	0.427748
ENSMUSP00000106559	HVLPASETACLR	C10(Carbamidomethyl)	1353.7				0.000462	0.00459584	16.88	0.363056	25.1	0.0550073	14.21	0.675181
ENSMUSP00000106519	MLLYR	N-Term(ICPL)	800.412				0.000693	0.0178169	20.71	0.0743033			17.21	0.166344
ENSMUSP00000106519	MIIYR	N-Term(ICPL:13C(6))	806.432				0.002103	0.0424999	24.58	0.0424972	17.22	0.231398	21.36	0.089199
ENSMUSP00000106519	DLISHDELFSDIYKIR	K14(ICPL)	2069.03	0.992054	-;1;-		0	4.48867e-11	60.4	2.26635e-05	92.22	1.48448e-08	58.7	3.41288e-05
ENSMUSP00000106519	DLISHDELFSDIYKIR	K14(ICPL:13C(6))	2075.05	1.01197	3;1;3	12.0581	0	4.99976e-10	73.55	1.21211e-06	64.51	9.66413e-06	75.65	7.58272e-07
ENSMUSP00000106509	SPIAEAVFR		989.54				3.6e-05	0.000359672	37.67	0.00153901	28.03	0.0141658	42.45	0.000511968
ENSMUSP00000106509	KHGIHMQHIAR	K1(ICPL)	1432.74	0.946918	1;1;-	16.2686	0	3.68286e-06	37	0.00405038	20.59	0.171102	39.14	0.00235874
ENSMUSP00000106509	KHGIHMQHIAR	K1(ICPL:13C(6))	1438.76	1.05271	3;2;5	13.8574	0	1.05661e-08	36.29	0.00419409	37.24	0.00332286	55.99	4.20452e-05
ENSMUSP00000106509	KLVTDEKVSDNWR	K1(ICPL:13C(6)); K7(ICPL:13C(6))	1811.91	0.946167	1;1;1	36.9623	0	3.16048e-09	16.44	0.438084	71.05	1.57832e-06	70.45	1.73552e-06
ENSMUSP00000106509	IDSAATSTYEVGNPPDYR		1955.9				0	7.88544e-10	92.23	8.55729e-09	91.05	1.13859e-08	84.91	4.61675e-08
ENSMUSP00000106509	KLVTDEKVSDNWR	K1(ICPL); K7(ICPL)	1799.87	1.08789	-;-;1		0	7.17006e-06					25.01	0.0615226
ENSMUSP00000106509	IDSAATSTYEVGNPPDYRGQNCMR	C22(Carbamidomethyl)	2702.2				0.000987	0.0287809					26.47	0.0206263
ENSMUSP00000106486	VLLESEQFLTELTR	N-Term(ICPL:13C(6))	1788.95				0.000874	0.0178003	11.11	1.75416
ENSMUSP00000106486	KSSVEGLEPAENKCLLR	K1(ICPL); K13(ICPL); C14(Carbamidomethyl)	2140.05				0	4.16825e-06	20.59	0.212132	15.34	0.738348	32.73	0.0127734
ENSMUSP00000106486	KSSVEGLEPAENKCLLR	K1(ICPL:13C(6)); K13(ICPL:13C(6)); C14(Carbamidomethyl)	2152.09	0.787297	-;-;1		0	1.22454e-08					43.18	0.00111314
ENSMUSP00000106481	VCHAHPTLSEAFR	C2(Carbamidomethyl)	1524.74				0	1.10597e-07	37.86	0.00207876	37.64	0.00218677	45.46	0.000347024
ENSMUSP00000106481	RPFTQNLGLEELGIELDPKGR	K19(ICPL)	2487.3	0.859716	2;-;-		0	4.82788e-09	49.02	0.000364038	22.57	0.160748
ENSMUSP00000106481	RPFTQNLGLEELGIELDPKGR	K19(ICPL:13C(6))	2493.32	0.969663	-;1;2		0	7.49917e-09	31.08	0.0199247	45.99	0.000654596	37.96	0.00412686
ENSMUSP00000106481	AKTNADTDGMVKILGHKSTDR	K2(ICPL); K12(ICPL); K17(ICPL)	2573.22	0.748243	4;4;2	12.0807	0	1.04853e-09	50.88	0.000183323	44.31	0.000780283	46.54	0.00049244
ENSMUSP00000106481	AKTNADTDGMVKILGHKSTDR	K2(ICPL:13C(6)); K12(ICPL:13C(6)); K17(ICPL:13C(6))	2591.28	0.708607	1;1;4	12.7905	0	6.42172e-11	51.93	0.000215446	39.56	0.00373486	54.53	0.000119101
ENSMUSP00000106481	VLGAHILGPGAGEMVNEAALALEYGASCEDIAR	C28(Carbamidomethyl)	3354.64				0	1.41117e-06	40.11	0.00409496	52.45	0.00024546	32.67	0.0227658
ENSMUSP00000106481	GIEIPEVR		912.514				0.009808	0.194644			20.67	0.0921316
ENSMUSP00000106481	EANLAAAFGKPINF	K10(ICPL)	1567.79	0.736624	-;1;-		0.000462	0.00448565			22.91	0.0954287
ENSMUSP00000106481	EANLAAAFGKPINF	K10(ICPL:13C(6))	1573.81	0.743101	-;-;1		0.003381	0.0847975					19.71	0.209535
ENSMUSP00000106332	GIVALAKSFNEER	K7(ICPL:13C(6))	1544.82	1.64987	-;1;-		0	0.000223479			46.73	0.000563721
ENSMUSP00000106319	LLDKPGLR	K4(ICPL:13C(6))	1022.61	1.06386	-;-;1		0.008155	0.207407					20.62	0.0329446
ENSMUSP00000106319	LLDKPGLR	K4(ICPL)	1016.59				9.8e-05	0.00178596					18.29	0.131203
ENSMUSP00000106270	DFTPSGIAGAFR		1238.62				3.6e-05	0.000623367					33.5	0.00665559
ENSMUSP00000106180	VAIEPGVPR		937.547				0	6.09334e-05	47.05	0.000108483	40.79	0.000491872	40	0.00055
ENSMUSP00000106180	EVDIKGVFR	K5(ICPL:13C(6))	1173.64	1.10682	1;3;1	5.32745	0	2.37842e-05	13.1	0.746913	46.38	0.000393547	29.39	0.0196787
ENSMUSP00000106180	EVDEYCKIGR	C6(Carbamidomethyl); K7(ICPL)	1373.61	0.993418	-;1;-		0	0.000334253	18.54	0.0594825	46.5	0.000127607	31.77	0.0040249
ENSMUSP00000106180	EVDEYCKIGR	C6(Carbamidomethyl); K7(ICPL:13C(6))	1379.63	1.12678	1;-;1	10.1798	3.6e-05	0.000341868	19.53	0.0958293	36.66	0.00184487	33.29	0.00400835
ENSMUSP00000106180	MAAPAKGENLSLVVHGPGDIR	M1(Oxidation)	2148.12				0	0.00010499	35.65	0.00661616	34.14	0.00925148	36.74	0.00514762
ENSMUSP00000106180	YNLTPTIFFCATPPDDGNLCR	C10(Carbamidomethyl); C20(Carbamidomethyl)	2472.13				0	5.12078e-07	74.05	5.70648e-07	69.87	1.49406e-06	74.18	5.61458e-07
ENSMUSP00000106180	YCNTWPMAISMLASKTLNVKPLVTHR	C2(Carbamidomethyl); K15(ICPL:13C(6)); K20(ICPL:13C(6))	3253.64	1.17729	1;1;1	10.7071	0	3.67701e-05	33.35	0.0187033	28.55	0.05767	19.3	0.477596
ENSMUSP00000106180	IGDFVVKKPMVLGHEAAGTVTKVGELVKHLKPGDR	K7(ICPL); K8(ICPL); K22(ICPL); K28(ICPL); K31(ICPL)	4251.2	1.02031	2;2;4	8.50527	0	4.49984e-10	20.86	0.335114	11.37	2.88865	47.84	0.00063555
ENSMUSP00000106180	IGDFVVKKPMVLGHEAAGTVTKVGELVKHLKPGDR	K7(ICPL:13C(6)); K8(ICPL:13C(6)); K22(ICPL:13C(6)); K28(ICPL:13C(6)); K31(ICPL:13C(6))	4281.3	1.32108	-;-;2		0	7.51382e-07	16.24	0.610848			23.74	0.082209
ENSMUSP00000106180	EVDIKGVFR	K5(ICPL)	1167.61	1.14466	-;-;1		0.000415	0.0120156			20.35	0.131005	26.99	0.028398
ENSMUSP00000106180	LENYPIPELGPNDVLLKMHSVGICGSDVHYWEHGR	K17(ICPL:13C(6)); C24(Carbamidomethyl)	4143				0	8.00144e-06					14.85	1.44357
ENSMUSP00000106180	FYKHNADFCYKLPDSVTFEEGALIEPLSVGIYACR	K3(ICPL:13C(6)); C9(Carbamidomethyl); K11(ICPL:13C(6)); C34(Carbamidomethyl)	4332.06	1.35958	-;-;1		0	3.64087e-06					14.91	1.26234
ENSMUSP00000106171	AHSNHTDIISFR		1397.69				0	5.44824e-07	50.56	0.00011647	70.73	1.20452e-06	63.66	5.91974e-06
ENSMUSP00000106171	GGVCIADEVQTGFGR	C4(Carbamidomethyl)	1565.74				0	4.96526e-06	26.74	0.0303985	39.4	0.00176816	45.58	0.000426109
ENSMUSP00000106171	VLAIHKQHLSPVDTAYFR	K6(ICPL)	2200.17	0.995222	1;-;-		0	2.7198e-07	46.57	0.000501166
ENSMUSP00000106171	VLAIHKQHLSPVDTAYFR	K6(ICPL:13C(6))	2206.19	1.15454	2;2;4	20.7807	0	2.25183e-09	39.61	0.00214962	47.67	0.000330888	44.97	0.000624103
ENSMUSP00000106171	KPLLLHQGHMEWLFDSEGNR	K1(ICPL:13C(6))	2518.25	1.08993	1;-;-		0	0.000267179	24.86	0.106631
ENSMUSP00000106171	QPLPKTEVNQIHEDCKDMGLLVGR	K5(ICPL:13C(6)); C15(Carbamidomethyl); K16(ICPL:13C(6))	2999.49	1.08879	1;-;-		0.000185	0.00179629	12.18	2.63929
ENSMUSP00000106171	LLHFSTFGGNPLACAIGSAVLEVIEEENLQR	C14(Carbamidomethyl)	3384.73				0	1.88604e-05	31.78	0.0268484	41.9	0.00263104	20.77	0.338781
ENSMUSP00000106171	GPWGGIHCR	C8(Carbamidomethyl)	1039.49				0	0.00037475			29.78	0.00473383	21.85	0.0418004
ENSMUSP00000106171	AALIQHMER		1068.56				0.000247	0.00563406			19.83	0.12635	22.32	0.0712158
ENSMUSP00000106171	GKGLMVGIEMVQDKISR	K2(ICPL); K14(ICPL)	2071.05	1.17013	-;1;-		0	1.11306e-06			35.32	0.00771133
ENSMUSP00000106171	GKGLMVGIEMVQDKISR	K2(ICPL:13C(6)); K14(ICPL:13C(6))	2083.09				0	7.5579e-05			17.53	0.437094
ENSMUSP00000106140	SVHKVEPITKHIGLVYSGMGPDYR	K4(ICPL:13C(6)); K10(ICPL:13C(6))	2905.48	1.03722	1;1;1	9.19239	0	1.43799e-09	44.7	0.00112157	39.76	0.00355091	52.01	0.000205534
ENSMUSP00000106140	SVHKVEPITKHIGLVYSGMGPDYR	K4(ICPL:13C(6)); K10(ICPL:13C(6)); M19(Oxidation)	2921.47	1.14381	1;-;-		5.1e-05	0.000832982	12.77	1.80728
ENSMUSP00000106140	KLAQQYYLVYQEPIPTAQLVQR	K1(ICPL:13C(6))	2760.48	1.08717	-;-;1		0	8.88514e-07					26.96	0.0430937
ENSMUSP00000106140	SVHKVEPITKHIGLVYSGMGPDYR	K4(ICPL); K10(ICPL)	2893.45				0	3.11347e-10					42.78	0.0018084
ENSMUSP00000106085;ENSMUSP00000088287	LLLPGELAKHAVSEGTKAVTKYTSAK	K9(ICPL); K17(ICPL); K21(ICPL); K26(ICPL)	3132.61				0	2.81308e-09	37.89	0.00553499	22.74	0.159899	30.62	0.0266591
ENSMUSP00000106085;ENSMUSP00000088287	LLLPGELAKHAVSEGTKAVTKYTSAK	K9(ICPL:13C(6)); K17(ICPL:13C(6)); K21(ICPL:13C(6)); K26(ICPL:13C(6))	3156.7				0	1.54021e-06			36.43	0.00451607	14.41	0.695507
ENSMUSP00000106085	PEPAKSAPAPKKGSKKAVTKAQKKDGKKR	K5(ICPL); K11(ICPL); K12(ICPL); K15(ICPL); K16(ICPL); K20(ICPL); K23(ICPL); K24(ICPL); K27(ICPL); K28(ICPL)	4110.03	1.66685	2;2;-	71.7746	0	3.70123e-08	33.5	0.0227585	25.19	0.1462	40.6	0.00446804
ENSMUSP00000106085	MPEPAKSAPAPKKGSKKAVTKAQKKDGKKR	N-Term(ICPL); K6(ICPL); K16(ICPL:13C(6)); K17(ICPL:13C(6)); K21(ICPL); K24(ICPL); K25(ICPL); K28(ICPL); K29(ICPL)	4148.06				0.004766	0.0915515	12.82	2.88101
ENSMUSP00000106085	MPEPAKSAPAPKKGSKKAVTKAQKKDGKKR	M1(Oxidation); K12(ICPL); K13(ICPL); K16(ICPL); K17(ICPL); K21(ICPL); K24(ICPL); K25(ICPL); K28(ICPL); K29(ICPL)	4152.04				0	2.90637e-05	18.17	0.870996	17.2	1.05372	14.62	1.97767
ENSMUSP00000106085	PEPAKSAPAPKKGSKKAVTKAQKKDGKKR	K5(ICPL:13C(6)); K11(ICPL:13C(6)); K12(ICPL:13C(6)); K15(ICPL:13C(6)); K16(ICPL:13C(6)); K20(ICPL:13C(6)); K23(ICPL:13C(6)); K24(ICPL:13C(6)); K27(ICPL:13C(6)); K28(ICPL:13C(6))	4170.25	1.45171	1;-;1	82.2004	0	3.08304e-07	61.28	1.31445e-05			41.43	0.0015684
ENSMUSP00000106085	PEPAKSAPAPKKGSKKAVTKAQKKDGKKR	N-Term(ICPL); K5(ICPL); K11(ICPL); K12(ICPL); K15(ICPL); K16(ICPL); K20(ICPL); K23(ICPL); K24(ICPL); K27(ICPL); K28(ICPL)	4215.07				0	2.37774e-10	77.16	9.53853e-07	62.04	3.2759e-05	80.76	4.41136e-07
ENSMUSP00000106085	PEPAKSAPAPKKGSKKAVTKAQKKDGKKR	N-Term(ICPL); K5(ICPL); K11(ICPL:13C(6)); K12(ICPL:13C(6)); K15(ICPL:13C(6)); K16(ICPL:13C(6)); K20(ICPL:13C(6)); K23(ICPL:13C(6)); K24(ICPL:13C(6)); K27(ICPL:13C(6)); K28(ICPL:13C(6))	4269.24				0	7.97708e-11	46.55	0.000698231	55.28	9.2651e-05	56.05	7.99569e-05
ENSMUSP00000106085	PEPAKSAPAPKKGSKKAVTKAQKKDGKKR	N-Term(ICPL:13C(6)); K5(ICPL:13C(6)); K11(ICPL:13C(6)); K12(ICPL:13C(6)); K15(ICPL:13C(6)); K16(ICPL:13C(6)); K20(ICPL:13C(6)); K23(ICPL:13C(6)); K24(ICPL:13C(6)); K27(ICPL:13C(6)); K28(ICPL:13C(6))	4281.27	4.99012	1;-;-		0	1.02554e-15	40.61	0.00226799	21.72	0.209632	81.91	1.72637e-07
ENSMUSP00000106085	MPEPAKSAPAPKKGSKKAVTKAQKKDGKKR	N-Term(ICPL:13C(6)); K12(ICPL:13C(6)); K13(ICPL:13C(6)); K16(ICPL:13C(6)); K17(ICPL:13C(6)); K21(ICPL:13C(6)); K24(ICPL:13C(6)); K25(ICPL:13C(6)); K28(ICPL:13C(6)); K29(ICPL:13C(6))	4301.29				0	0.000200219	18.71	0.349924
ENSMUSP00000106085	MPEPAKSAPAPKKGSKKAVTKAQKKDGKKR	N-Term(ICPL:13C(6)); M1(Oxidation); K6(ICPL:13C(6)); K16(ICPL:13C(6)); K17(ICPL); K21(ICPL:13C(6)); K24(ICPL:13C(6)); K25(ICPL:13C(6)); K28(ICPL:13C(6)); K29(ICPL:13C(6))	4200.22				0	0.00059266			26.55	0.0766837	24.09	0.134335
ENSMUSP00000106085	MPEPAKSAPAPKKGSKKAVTKAQKKDGKKR	N-Term(ICPL:13C(6)); K6(ICPL); K12(ICPL:13C(6)); K16(ICPL:13C(6)); K17(ICPL:13C(6)); K21(ICPL:13C(6)); K24(ICPL:13C(6)); K25(ICPL:13C(6)); K28(ICPL:13C(6)); K29(ICPL:13C(6))	4295.29				0.000495	0.00598141			20.94	0.242822
ENSMUSP00000106085	MPEPAKSAPAPKKGSKKAVTKAQKKDGKKR	M1(Oxidation); K6(ICPL); K12(ICPL:13C(6)); K13(ICPL:13C(6)); K16(ICPL:13C(6)); K17(ICPL:13C(6)); K21(ICPL:13C(6)); K24(ICPL:13C(6)); K25(ICPL:13C(6)); K28(ICPL:13C(6)); K29(ICPL:13C(6))	4311.28				0	9.41301e-07			45.86	0.000824949
ENSMUSP00000106085	MPEPAKSAPAPKKGSKKAVTKAQKKDGKKR	N-Term(ICPL); K12(ICPL); K13(ICPL); K16(ICPL); K17(ICPL); K21(ICPL); K24(ICPL); K25(ICPL); K28(ICPL); K29(ICPL)	4241.06	0.964196	-;-;1		0.000358	0.00950576					11.8	3.32329
ENSMUSP00000105850	NLVVDDETATSLR		1432.73				0	1.52443e-05	33.96	0.00727241	22.22	0.108562	22.16	0.110985
ENSMUSP00000105850	QVCEQLIQSHMAR	C3(Carbamidomethyl)	1599.77				0	2.44998e-06	53.99	6.00532e-05	61.06	1.34358e-05	47	0.000317247
ENSMUSP00000105850	LTWDPASGKISGYR	K9(ICPL:13C(6))	1661.84	1.17368	1;1;2	24.9542	0	1.19634e-05	16	0.517449	43.74	0.000891831	48.1	0.000339191
ENSMUSP00000105850	YTAILNQIPSQSSSIR		1777.94				0	2.70208e-06	38.02	0.0039598	41.68	0.00164707	36.89	0.00497286
ENSMUSP00000105850	CCELPGLRDEESCPDLPR	C1(Carbamidomethyl); C2(Carbamidomethyl); C13(Carbamidomethyl)	2202.96				0	0.000413078	19.65	0.0541963	19.2	0.058911
ENSMUSP00000105850	IVLESLQDTQAQESTVGGGVNR		2301.17				0	6.70704e-13	109.07	3.0908e-10	104.61	9.06361e-10	103.04	1.26383e-09
ENSMUSP00000105850	HISYKGGNTKTGKAIKHVR	K5(ICPL); K10(ICPL); K13(ICPL); K16(ICPL)	2515.27				0	1.15212e-07	29.24	0.0344865	30.97	0.0233952
ENSMUSP00000105850	HISYKGGNTKTGKAIKHVR	K5(ICPL:13C(6)); K10(ICPL:13C(6)); K13(ICPL:13C(6)); K16(ICPL:13C(6))	2539.35	1.47824	1;1;1	48.4266	0	2.14749e-08	26.28	0.0525176	35.42	0.00622959	43.76	0.00088563
ENSMUSP00000105850	IKDLEKR	K2(ICPL:13C(6)); K6(ICPL:13C(6))	1123.63	1.01682	-;1;-		0.003537	0.0882416			17.13	0.226561	16.49	0.262534
ENSMUSP00000105850	IGLAQYSGDPR		1176.6				0	0.000284697			30.68	0.0158615	23.8	0.0773293
ENSMUSP00000105850	VSWDISDSNVEQFR		1681.78				0	5.50993e-07			84.01	3.7336e-08
ENSMUSP00000105850	ITWDPPSGPVKGYR	K11(ICPL:13C(6))	1683.86	0.954121	-;1;1		0	4.08283e-05			28.16	0.0289474	25.59	0.052727
ENSMUSP00000105850	YNVISHDSIQISWKAPR	K14(ICPL:13C(6))	2125.09				0	3.31492e-07			37.22	0.00526336
ENSMUSP00000105850	NFLENLVTAFNVGSEKTR	K16(ICPL:13C(6))	2150.1	1.01129	-;2;-		0	6.70474e-08			36.91	0.00648798
ENSMUSP00000105850	TEFKLDSYKTKETLLDAIR	K4(ICPL); K9(ICPL); K11(ICPL)	2586.29	1.03152	-;1;-		0	3.75129e-06			31.01	0.0244883	38.46	0.00446928
ENSMUSP00000105850	TEFKLDSYKTKETLLDAIR	K4(ICPL:13C(6)); K9(ICPL:13C(6)); K11(ICPL:13C(6))	2604.35				0	5.52734e-08			26.25	0.0701927	34.18	0.0121649
ENSMUSP00000105850	SLPYKGGNTLTGLALNFIFENSFKPEAGSR	K5(ICPL:13C(6)); K24(ICPL:13C(6))	3450.75	1.0121	-;-;1		0	7.99057e-05			23.51	0.157762	36.58	0.00842879
ENSMUSP00000105850	GGKPEEVVVDGSVSSTVLKNLMSSTEYQIAVFAVSAHTASEGLR	K3(ICPL:13C(6)); K19(ICPL:13C(6))	4772.39				0	9.28628e-05			19.33	0.628327
ENSMUSP00000105850	IKDLEKR	K2(ICPL); K6(ICPL)	1111.59	0.741258	-;-;1		0.004757	0.121843					20.55	0.105285
ENSMUSP00000105850	LTWDPASGKISGYR	K9(ICPL)	1655.82				6.7e-05	0.00169757					34.32	0.00673087
ENSMUSP00000105850	SLPYKGGNTLTGLALNFIFENSFKPEAGSR	K5(ICPL); K24(ICPL)	3438.71				0.000935	0.0272299					13.15	1.96816
ENSMUSP00000105796	LLIEDLEAR		1071.6				0	6.19855e-06	43.33	0.000390193	43.94	0.000339062	44.63	0.000289254
ENSMUSP00000105796	WVPPLIGEMYGLR		1530.81				0	0.000464591	33.74	0.00807297	24.97	0.0627287
ENSMUSP00000105796	MAASKVKQDMPPPGGYGPIDYKR	N-Term(ICPL); M1(Oxidation); K22(ICPL)	2732.29				0	7.02935e-06	26.94	0.0425846	29.43	0.0237742	26.47	0.0399
ENSMUSP00000105697	LLQATHAIR		1022.61				0.000226	0.00288288	42.94	0.000157529	21.42	0.0230754	17.41	0.056281
ENSMUSP00000105531	QLVEQVEQIQKEQNYQR	K11(ICPL:13C(6))	2271.14	1.43458	1;1;-	6.46438	0	4.59758e-05	34.02	0.0115713	14.17	1.07957
ENSMUSP00000105523	GVVHKSLPPR	K5(ICPL:13C(6))	1200.69				0.000502	0.00914322	20.21	0.0924212
ENSMUSP00000105523	AAMIWIVGEYAER		1508.76				0	1.67685e-08	78.92	2.32102e-07	49.21	0.000211112
ENSMUSP00000105523	KCLKDEDPYVR	K1(ICPL); C2(Carbamidomethyl); K4(ICPL)	1632.75	1.13901	1;-;-		3.6e-05	0.000346631	11.65	0.591584			23.5	0.0366281
ENSMUSP00000105523	KCLKDEDPYVR	K1(ICPL:13C(6)); C2(Carbamidomethyl); K4(ICPL:13C(6))	1644.79	1.15998	-;1;2		0	5.83536e-05			14.39	0.502203	34.01	0.0056997
ENSMUSP00000105523	DCPLNTEAASNKLQSSNIFTVAKR	C2(Carbamidomethyl); K12(ICPL:13C(6)); K23(ICPL:13C(6))	2886.43	1.17653	-;1;1		0	0.00023919			25.93	0.088834	12.82	1.79704
ENSMUSP00000105523	KYPNKYESVIATLCENLDSLDEPEAR	K1(ICPL:13C(6)); K5(ICPL:13C(6)); C14(Carbamidomethyl)	3276.56	1.3296	-;1;1		0	2.37039e-06			16.89	0.632351	38.05	0.00567164
ENSMUSP00000105471	TRQEWESAGQQAPHPR		1877.9				0	3.51476e-08	36.62	0.00481274	41.49	0.00149721	42.61	0.00121169
ENSMUSP00000105471	KGACANHVSTMANFLKGAHVTINAR	K1(ICPL:13C(6)); C4(Carbamidomethyl); K16(ICPL:13C(6))	2890.44	1.57795	1;-;-		0	3.90825e-06	29.45	0.0376256			39.19	0.00399469
ENSMUSP00000105359	VAGGKAGKDSGKAKAKAVSR	N-Term(ICPL:13C(6)); K8(ICPL); K12(ICPL); K14(ICPL); K16(ICPL)	2417.23				0	7.16459e-06	30.13	0.0303284
ENSMUSP00000105270	QFVKDSIR	K4(ICPL:13C(6))	1103.59	1.07703	1;-;-		0	0.000663433	47.3	0.000265347
ENSMUSP00000104938	TYFHEFGHVMHQICAQTDFAR	C14(Carbamidomethyl)	2595.17				0	0.000171477			10.61	0.786409	20.55	0.0823781
ENSMUSP00000104938	TMLDFPQHVSSDR		1532.72				3.6e-05	0.000374075					19.32	0.111102
ENSMUSP00000104910	ITQLVSEQANQVLAR		1669.92				0	9.10922e-06			44.19	0.000417267
ENSMUSP00000104830;ENSMUSP00000093951	WTGMIIGPPR	M4(Oxidation)	1143.6				0	8.60202e-06					38.52	0.00190519
ENSMUSP00000104830	VNMSGVSSSNGVVDPR		1604.77				0	6.0161e-09	57.19	2.96982e-05	48.17	0.00023318	56.62	3.3319e-05
ENSMUSP00000104830	IYSLKIECGPKYPEAPPSVR	K5(ICPL); C8(Carbamidomethyl); K11(ICPL)	2514.25				0	0.000128774					18.09	0.42613
ENSMUSP00000104830	IYSLKIECGPKYPEAPPSVR	K5(ICPL:13C(6)); C8(Carbamidomethyl); K11(ICPL:13C(6))	2526.29	0.955861	-;-;1		0	1.67567e-06					21.85	0.2139
ENSMUSP00000104712	YTTPEDATPEPGEDPR		1774.78				0	0.000359385	19.11	0.050325	27.93	0.00845589
ENSMUSP00000104466	LLMHGKEVGSIIGKKGESVKKMR	K6(ICPL); K14(ICPL); K15(ICPL); K20(ICPL); K21(ICPL)	3050.55	0.73937	-;-;1		0	1.25028e-07	26.23	0.103154			21.72	0.291735
ENSMUSP00000104466	LLMHGKEVGSIIGKKGESVKKMR	K6(ICPL:13C(6)); K14(ICPL:13C(6)); K15(ICPL:13C(6)); K20(ICPL:13C(6)); K21(ICPL:13C(6))	3080.65	0.638159	1;1;-	1.45995	0	2.3123e-08	32.57	0.0117587	30.23	0.0164551	16.03	0.482704
ENSMUSP00000104466	LVVPASQCGSLIGKGGCKIKEIR	C8(Carbamidomethyl); K14(ICPL:13C(6)); C17(Carbamidomethyl); K18(ICPL:13C(6)); K20(ICPL:13C(6))	2803.49	2.0978	-;1;-		0	1.49137e-05			12.84	1.27659	13.8	1.00049
ENSMUSP00000104233	KKYPDRVPVIVEKAPKAR	K1(ICPL); K2(ICPL); K13(ICPL); K16(ICPL)	2514.34	0.953155	1;1;1	12.7252	0	0.000704859	28.81	0.0276855	26.28	0.0515756	26.99	0.042997
ENSMUSP00000104233	KKYPDRVPVIVEKAPKAR	K1(ICPL:13C(6)); K2(ICPL:13C(6)); K13(ICPL:13C(6)); K16(ICPL:13C(6))	2538.42	0.950493	-;1;1		0	9.90415e-09	12.15	0.615632	31.24	0.00751623	27.13	0.0195579
ENSMUSP00000104189	DSLLQDGEFTMDLR		1639.77				0	6.02987e-10	92.61	5.67467e-09	84.12	4.00812e-08	83.5	4.66784e-08
ENSMUSP00000104189	DSLLQDGEFTMDLR	M11(Oxidation)	1655.76				0	4.97055e-08	61.68	4.68651e-06	71.23	5.27349e-07	60.08	6.38136e-06
ENSMUSP00000104189	SSFFVNGLTLGGQKCSVIR	K14(ICPL); C15(Carbamidomethyl)	2175.1	0.877805	2;-;-		0	4.85981e-10	86.97	5.35423e-08	55.05	8.26848e-05	36.65	0.00591504
ENSMUSP00000104189	SSFFVNGLTLGGQKCSVIR	K14(ICPL:13C(6)); C15(Carbamidomethyl)	2181.12	0.985515	-;2;1		0	5.52116e-09	79.47	2.7793e-07	78.77	3.17247e-07	82.3	1.42206e-07
ENSMUSP00000104068	GGAGVGSMTKIYGGR	K10(ICPL)	1515.74	1.15546	2;-;-		0	2.1412e-08	59.58	1.96074e-05	52.34	0.000110563	45.23	0.000533851
ENSMUSP00000104068	GGAGVGSMTKIYGGR	K10(ICPL:13C(6))	1521.76	1.0755	2;1;2	3.21423	0	5.15289e-08	66.8	3.87564e-06	61.12	1.44491e-05	49.48	0.000209095
ENSMUSP00000104068	GGAGVGSMTKIYGGR	M8(Oxidation); K10(ICPL)	1531.73	1.09822	1;-;1	15.7155	0	6.10191e-08	42.03	0.00107464	42.18	0.000986706	57.15	3.28643e-05
ENSMUSP00000104068	GGAGVGSMTKIYGGR	M8(Oxidation); K10(ICPL:13C(6))	1537.75				0	1.16882e-05	41.24	0.00131534	43.99	0.000750167	49.4	0.000211834
ENSMUSP00000104068	PGVTVKDVNQQEFVR	K6(ICPL)	1820.93	0.80919	-;-;1		0	9.52238e-07	54.76	7.58623e-05	44.89	0.000729764	53.43	9.78244e-05
ENSMUSP00000104068	PGVTVKDVNQQEFVR	K6(ICPL:13C(6))	1826.95	1.49541	2;2;1	79.2015	0	4.86698e-09	61.44	1.36022e-05	68.75	2.68038e-06	65.04	5.92191e-06
ENSMUSP00000104068	PGVTVKDVNQQEFVR	N-Term(ICPL); K6(ICPL)	1925.95				0	3.44667e-10	73.87	1.03166e-06	33.71	0.0114699	46.84	0.000532026
ENSMUSP00000104068	PGVTVKDVNQQEFVR	N-Term(ICPL:13C(6)); K6(ICPL:13C(6))	1937.99				0	8.87618e-10	46.57	0.000473629	67.22	4.03998e-06	70.32	2.01121e-06
ENSMUSP00000104068	VLQALEGLKMVEKDQDGGR	K9(ICPL); K13(ICPL)	2296.14	1.02899	1;1;-	6.94787	0	1.07982e-09	45.7	0.00076305	42.77	0.001514	43.52	0.00126275
ENSMUSP00000104068	VLQALEGLKMVEKDQDGGR	K9(ICPL:13C(6)); K13(ICPL:13C(6))	2308.18	1.019	1;2;3	7.03331	0	3.55245e-10	43.24	0.00149623	89.28	3.88916e-08	77.93	5.28292e-07
ENSMUSP00000104068	RVLQALEGLKMVEKDQDGGR	K10(ICPL); K14(ICPL)	2452.24	1.11283	-;1;1		0	3.54044e-09	44.46	0.00138941	72.27	2.26201e-06	47.7	0.000658919
ENSMUSP00000104068	RVLQALEGLKMVEKDQDGGR	K10(ICPL:13C(6)); K14(ICPL:13C(6))	2464.28	1.04717	2;1;1	4.68131	0	1.62723e-10	71.74	2.10344e-06	56.99	6.17957e-05	47.65	0.000531693
ENSMUSP00000104068	RVLQALEGLKMVEKDQDGGR	K10(ICPL:13C(6)); M11(Oxidation); K14(ICPL:13C(6))	2480.28				0	9.71538e-07			42.83	0.00163134
ENSMUSP00000104068	IAGQVAAANKKH	K10(ICPL); K11(ICPL)	1417.73				0.002475	0.0625468					13.12	0.965306
ENSMUSP00000104068	IAGQVAAANKKH	K10(ICPL:13C(6)); K11(ICPL:13C(6))	1429.77	1.09815	-;-;2		0	0.000203892					31.25	0.0116983
ENSMUSP00000104068	RVLQALEGLKMVEKDQDGGR	K10(ICPL); M11(Oxidation); K14(ICPL)	2468.23	1.0578	-;-;1		0	1.15576e-06					41.84	0.00202937
ENSMUSP00000103961	VFFEQGATR		1054.53				9.3e-05	0.000806564			33.2	0.00579142
ENSMUSP00000103961	TYTWQIPER		1193.59				6.7e-05	0.000820428			26.92	0.0318064	35.95	0.00397662
ENSMUSP00000103961	IGGSYKKMAYR	K6(ICPL:13C(6)); K7(ICPL:13C(6))	1495.76	1.20763	-;1;-		0	0.000521601			22.93	0.0870956
ENSMUSP00000103940	VKGGGHVAQIYAIR	K2(ICPL)	1573.86	1.1166	1;-;-		0	7.93572e-07	58.99	2.03785e-05			54.69	5.28117e-05
ENSMUSP00000103940	VKGGGHVAQIYAIR	K2(ICPL:13C(6))	1579.88	1.08326	3;1;3	2.78557	0	1.86045e-11	49.77	0.000117564	87.89	1.81249e-08	64.64	3.83067e-06
ENSMUSP00000103940	RCESKKFGGPGAR	C2(Carbamidomethyl); K5(ICPL); K6(ICPL)	1659.78	1.05163	1;-;1	2.53057	6.7e-05	0.00171774	19.46	0.127395			19.07	0.141223
ENSMUSP00000103940	KKTATAVAHCKR	K1(ICPL); K2(ICPL); C10(Carbamidomethyl); K11(ICPL)	1685.83	1.11425	1;1;1	8.38475	0	1.51523e-07	64.82	5.07599e-06	64.82	5.25727e-06	48.62	0.000230152
ENSMUSP00000103940	KKTATAVAHCKR	K1(ICPL:13C(6)); K2(ICPL:13C(6)); C10(Carbamidomethyl); K11(ICPL:13C(6))	1703.89	1.16421	3;1;3	5.26237	0	2.21211e-08	53.6	8.68667e-05	67.59	3.44878e-06	52.79	0.000103362
ENSMUSP00000103940	PSKGPLQSVQVFGR	N-Term(ICPL); K3(ICPL)	1709.88				0	5.99786e-07	35.86	0.00444902			39.94	0.00168309
ENSMUSP00000103940	PSKGPLQSVQVFGR	N-Term(ICPL:13C(6)); K3(ICPL:13C(6))	1721.92				0	0.000234326	42.21	0.00103702	23.78	0.0632378	29.15	0.0200671
ENSMUSP00000103940	GNGLIKVNGRPLEMIEPR	K6(ICPL:13C(6))	2104.14				0	5.89246e-05	21.83	0.130245
ENSMUSP00000103940	TLQYKLLEPVLLLGKER	K5(ICPL:13C(6)); K15(ICPL:13C(6))	2235.29	1.04183	1;-;1	0.07808	0	8.94821e-07	38.27	0.000573404			27.16	0.0074039
ENSMUSP00000103940	FAGVDIR		777.426				0.001269	0.0217294			28.12	0.0143378
ENSMUSP00000103940	TLLVADPRR		1040.62				0.007207	0.189172					26.66	0.00884675
ENSMUSP00000103940	TLQYKLLEPVLLLGKER	K5(ICPL); K15(ICPL)	2223.25				0	2.13627e-06					19.85	0.10662
ENSMUSP00000103903	FHINLR		799.457				0.003863	0.100546					17.14	0.227006
ENSMUSP00000103903	FVVNFQNSFNGNDIAFHFNPR		2484.18				3.6e-05	0.000332836	10.47	1.9205			27.01	0.0407093
ENSMUSP00000103903	CGGDIAFHLNPR	C1(Carbamidomethyl)	1356.65				0	2.70854e-07			38.75	0.00220031	65	5.1387e-06
ENSMUSP00000103903	NTQINNSWGQEER		1575.72				0	2.41157e-07			63.9	3.09609e-06	68.75	1.07348e-06
ENSMUSP00000103831	SHYSNIEANESEEVR		1763.78				0	7.82757e-10	36.85	0.00132184	62.26	3.92233e-06	92.83	3.57018e-09
ENSMUSP00000103831	SGTIGSHELPGAFEAAGFHLNEHLYSMIIR		3254.6				0	1.56845e-08	37.66	0.00718148	27.51	0.0736289	15.53	1.16438
ENSMUSP00000103831	LDAMFR		752.376				0.000693	0.01563			13.91	0.201189	31.3	0.00815441
ENSMUSP00000103743	RMWPLER	M2(Oxidation)	1003.51				0.000146	0.00156901	26.73	0.028133			13.26	0.625484
ENSMUSP00000103743	WLKDQELSPR	K3(ICPL)	1376.69	0.910228	-;-;1		0	0.000132371	36.65	0.00404428			44.33	0.000702902
ENSMUSP00000103743	RMWPLER		987.518				0.000247	0.00414888					34.04	0.00522656
ENSMUSP00000103743	FWDNFLR		997.488				0.001476	0.0383871					14.1	0.291784
ENSMUSP00000103743	IFPGDTILETGEVIPPMR		1985.04				0.000272	0.00655565					15.68	0.665174
ENSMUSP00000103673	SQQTYHSQHGKPLLLEYGHQELLR	K11(ICPL:13C(6))	2973.5	1.0144	1;1;-	4.38949	0	7.11732e-07	12.83	2.21247	29.82	0.0455493
ENSMUSP00000103673	HDPLNPLCPGATR	C8(Carbamidomethyl)	1447.71				0	0.000184552					27.81	0.0270718
ENSMUSP00000103657	TDLKMGKGKVAAQCSHAAVSAYKQTQR	K4(ICPL:13C(6)); K7(ICPL:13C(6)); K9(ICPL:13C(6)); C14(Carbamidomethyl); K23(ICPL:13C(6))	3378.69	1.18305	1;-;-		0	5.6432e-07	25.64	0.105066			27.83	0.0699645
ENSMUSP00000103657	SHLGMFPQNSTSEANR		1775.82				0	0.000161214					36.84	0.00202874
ENSMUSP00000103657	TDLKMGKGKVAAQCSHAAVSAYKQTQR	K4(ICPL); K7(ICPL); K9(ICPL); C14(Carbamidomethyl); K23(ICPL)	3354.58	1.24287	-;-;1		0	6.08368e-09					34.46	0.00898822
ENSMUSP00000103477	SVLISLKQAPLVH	K7(ICPL)	1509.88	0.824302	1;-;1	33.598	0	2.23531e-05	26.09	0.0150082	37.93	0.00100665	21.63	0.0357276
ENSMUSP00000103477	SVLISLKQAPLVH	K7(ICPL:13C(6))	1515.9	0.885233	-;-;1		0	0.000207062	22.99	0.0178332	19	0.0465802	28.91	0.00456277
ENSMUSP00000103477	LCDFNPKSSKQAKDVSR	C2(Carbamidomethyl); K7(ICPL); K10(ICPL); K13(ICPL)	2295.06	0.904078	2;1;1	10.4638	0	4.93644e-09	56.97	2.47118e-05	47.63	0.000214867	36.2	0.00298655
ENSMUSP00000103477	AAEEAFVNDIDESSPGTEWER		2352.03				0	6.16244e-12	99.22	7.41979e-10	86.44	1.40732e-08	88.36	9.04465e-09
ENSMUSP00000103477	LCDFNPKSSKQAKDVSR	C2(Carbamidomethyl); K7(ICPL:13C(6)); K10(ICPL:13C(6)); K13(ICPL:13C(6))	2313.12	1.27921	-;1;1		0	1.33817e-09			75.24	6.3436e-07	46.56	0.000472513
ENSMUSP00000103477	KQEAEWKEKAIKELEEWYAR	K1(ICPL:13C(6)); K7(ICPL:13C(6)); K9(ICPL:13C(6)); K12(ICPL:13C(6))	3008.48	1.06205	-;-;2		0	1.21983e-08			11.91	2.08711	39.16	0.00393745
ENSMUSP00000103365	GTVLLSGPR		899.531				0	6.62252e-06	55.16	1.47823e-05	38.03	0.000763382	46.64	0.000105134
ENSMUSP00000103365	LLVKLYR	K4(ICPL)	1009.62				0.000721	0.0192002	17.03	0.0733165	18.41	0.0548004	28.13	0.00584499
ENSMUSP00000103365	LLVKLYR	K4(ICPL:13C(6))	1015.64	1.03104	3;2;2	1.53371	6.7e-05	0.000776217	24.56	0.00559912	21.36	0.0116982	35.57	0.000443731
ENSMUSP00000103365	KMKLPGR	K1(ICPL); K3(ICPL)	1039.55	0.973362	1;-;-		0.00744	0.144904	10.18	1.07453
ENSMUSP00000103365	KMKLPGR	K1(ICPL:13C(6)); K3(ICPL:13C(6))	1051.59	0.920134	1;-;3	10.6575	0.000247	0.00452058	16.11	0.194701	21.19	0.0642476	22.03	0.0498158
ENSMUSP00000103365	TNRPPLSLSR		1140.65				9.8e-05	0.00194328	30.58	0.0105436	24.09	0.046988	31.64	0.00826013
ENSMUSP00000103365	TNSTFNQVVLKR	K11(ICPL)	1511.8	1.04027	1;-;2	3.78381	0	1.58884e-07	83.68	6.62107e-08	43.16	0.00073908	79.85	1.58894e-07
ENSMUSP00000103365	TNSTFNQVVLKR	K11(ICPL:13C(6))	1517.82	1.11985	4;4;3	2.46129	0	2.78923e-06	70.7	1.22138e-06	58.02	2.33486e-05	66.09	3.53063e-06
ENSMUSP00000103365	KEPKSQDIYLR	K1(ICPL); K4(ICPL)	1586.79	1.14759	-;1;1		0	9.1109e-05	27.71	0.0300745	23.56	0.0775377	36.67	0.00391806
ENSMUSP00000103365	KEPKSQDIYLR	K1(ICPL:13C(6)); K4(ICPL:13C(6))	1598.84	0.949081	1;2;3	11.3316	0	0.000114249	29.43	0.0205815	38.31	0.00256773	36.88	0.00356902
ENSMUSP00000103365	RKEPKSQDIYLR	K2(ICPL); K5(ICPL)	1742.9	0.994813	2;2;4	5.7229	0	9.07041e-07	38.85	0.00285394	38.86	0.00284087	43.85	0.000918977
ENSMUSP00000103365	ILEVPKLKVCALR	K6(ICPL); K8(ICPL); C10(Carbamidomethyl)	1748.99	1.02963	1;-;4	13.0437	0	0.000233403	13.92	0.421729			46.76	0.000235112
ENSMUSP00000103365	RKEPKSQDIYLR	K2(ICPL:13C(6)); K5(ICPL:13C(6))	1754.94	0.992695	2;2;-	2.90139	0	1.11568e-05	30.66	0.0143026	33.77	0.00642231	28.25	0.022668
ENSMUSP00000103365	ILEVPKLKVCALR	K6(ICPL:13C(6)); K8(ICPL:13C(6)); C10(Carbamidomethyl)	1761.03	1.13086	1;1;2	11.0465	0	5.71353e-07	40.5	0.000450082	32.97	0.00254854	26.41	0.0115423
ENSMUSP00000103365	ENKTAVVVGTVTDDVR	K3(ICPL)	1807.92	0.850628	1;-;-		0	6.62854e-10	34.31	0.0096377	30.99	0.020939	65.61	7.00713e-06
ENSMUSP00000103365	ENKTAVVVGTVTDDVR	K3(ICPL:13C(6))	1813.94	1.05113	2;2;2	7.78668	0	3.98542e-11	62.91	1.43527e-05	60.81	2.1991e-05	69.69	2.86755e-06
ENSMUSP00000103365	HFGKAPGTPHSHTKPYVR	K4(ICPL:13C(6))	2128.09				0.00065	0.0133242	16.72	0.61184
ENSMUSP00000103365	HFGKAPGTPHSHTKPYVR	K4(ICPL); K14(ICPL)	2227.1	1.04193	3;2;3	7.37498	0	1.51053e-06	41	0.00181504	37.7	0.00377859	49.83	0.000228782
ENSMUSP00000103365	HFGKAPGTPHSHTKPYVR	K4(ICPL:13C(6)); K14(ICPL:13C(6))	2239.14	1.02163	3;4;2	2.64676	0	9.10886e-08	48.03	0.00044465	58.67	3.72178e-05	59.95	2.883e-05
ENSMUSP00000103365	ILKAGGKILTFDQLALESPKGR	K3(ICPL:13C(6)); K7(ICPL:13C(6)); K20(ICPL:13C(6))	2688.5	1.01968	3;2;4	4.94371	0	2.47943e-07	18.02	0.174326	24.78	0.0349293	49.41	0.000124288
ENSMUSP00000103365	RTNSTFNQVVLKR	K12(ICPL:13C(6))	1673.92	1.10476	-;-;1		0.000247	0.00575694					16.54	0.299457
ENSMUSP00000103365	ILKAGGKILTFDQLALESPKGR	K3(ICPL); K7(ICPL); K20(ICPL)	2670.45				0	9.10605e-06					29.76	0.0189699
ENSMUSP00000103365	KMKLPGRENKTAVVVGTVTDDVR	K1(ICPL:13C(6)); K3(ICPL:13C(6)); K10(ICPL:13C(6))	2846.51	1.27107	-;-;1		0	2.30852e-07					42.25	0.00153383
ENSMUSP00000103210	SKNQPFCDGSHFFQR	K2(ICPL); C7(Carbamidomethyl)	1959.86	1.07289	1;-;-		0	7.75562e-05	22.84	0.0215798
ENSMUSP00000103210	SKNQPFCDGSHFFQR	K2(ICPL:13C(6)); C7(Carbamidomethyl)	1965.88	0.857851	-;1;1		0	1.76015e-05			19.89	0.0769239	29.04	0.0091059
ENSMUSP00000103181	MPEKVTWMR	K4(ICPL)	1282.61	1.06899	2;-;1	4.1946	0	0.00021625	38.49	0.00121758			33.89	0.00371571
ENSMUSP00000103181	MPEKVTWMR	K4(ICPL:13C(6))	1288.63	1.06496	-;1;2		0	4.68862e-06	29.92	0.0142603	31.04	0.0116089	52.96	7.05625e-05
ENSMUSP00000103181	KLIKDGLIIR	K1(ICPL); K4(ICPL)	1378.82	1.02819	1;1;2	2.39643	3.6e-05	0.000608604	37.76	0.000401986	44.65	9.5975e-05	37.18	0.000459421
ENSMUSP00000103181	KLIKDGLIIR	K1(ICPL:13C(6)); K4(ICPL:13C(6))	1390.86	1.04762	2;2;2	6.28875	0	8.21411e-07	32.05	0.000810855	43.05	6.44085e-05	43.15	6.29424e-05
ENSMUSP00000103181	KKLLADQAEAR	K1(ICPL); K2(ICPL)	1452.76	1.11404	1;1;1	10.9628	0	4.44691e-07	49.88	0.000149062	27.58	0.0258382	29.91	0.0148036
ENSMUSP00000103181	KKLLADQAEAR	K1(ICPL:13C(6)); K2(ICPL:13C(6))	1464.8	1.08798	3;4;4	4.4678	0	4.92986e-09	63.72	4.54343e-06	61.03	8.4408e-06	67.17	1.99542e-06
ENSMUSP00000103181	KKLLADQAEARR	K1(ICPL:13C(6)); K2(ICPL:13C(6))	1620.9	1.08397	1;1;1	4.36405	0	0.000387987	14.21	0.521558	13.93	0.489537	14.71	0.429342
ENSMUSP00000103181	ILMEHIHKLKADKAR	K8(ICPL); K10(ICPL); K13(ICPL)	2118.1	0.954713	2;3;-	3.81966	0	2.29392e-08	35.91	0.00605218	45.23	0.000683809	32.91	0.0120757
ENSMUSP00000103181	ILMEHIHKLKADKAR	M3(Oxidation); K8(ICPL); K10(ICPL); K13(ICPL)	2134.1	0.993179	1;-;1	3.54681	0	1.90701e-09	24.75	0.0912781			53.13	0.0001306
ENSMUSP00000103181	ILMEHIHKLKADKAR	K8(ICPL:13C(6)); K10(ICPL:13C(6)); K13(ICPL:13C(6))	2136.17	1.1372	1;1;4	14.3121	0	9.47357e-09	37.1	0.00335373	68.58	2.48229e-06	75.14	5.22065e-07
ENSMUSP00000103181	ILMEHIHKLKADKAR	M3(Oxidation); K8(ICPL:13C(6)); K10(ICPL:13C(6)); K13(ICPL:13C(6))	2152.16	1.12121	-;1;-		0	1.28197e-06	24.67	0.0694328	23.24	0.0965082	38.97	0.00257333
ENSMUSP00000103181	HMYHSLYLKVKGNVFKNKR	K9(ICPL); K11(ICPL); K16(ICPL); K18(ICPL)	2782.38	0.840392	-;-;1		0	3.63732e-08	24.39	0.121912			25.79	0.0884489
ENSMUSP00000103181	CGKKKVWLDPNETNEIANANSR	C1(Carbamidomethyl); K3(ICPL); K4(ICPL); K5(ICPL)	2859.33	1.16038	1;1;-	16.2604	0	9.80972e-09	30.99	0.0150872	43.57	0.000723046	54.72	5.1099e-05
ENSMUSP00000103181	LQAKKEEIIKTLSKEEETKK	K4(ICPL); K5(ICPL); K10(ICPL); K14(ICPL); K19(ICPL); K20(ICPL)	3003.49	0.886752	3;3;1	10.6874	0	3.56044e-08	26.33	0.0802027	31.77	0.0226526	22.31	0.212671
ENSMUSP00000103181	MPEKVTWMR	K4(ICPL:13C(6)); M8(Oxidation)	1304.62				0.00221	0.0369712			12.31	0.581614
ENSMUSP00000103181	CGKKKVWLDPNETNEIANANSR	C1(Carbamidomethyl); K3(ICPL:13C(6)); K4(ICPL:13C(6)); K5(ICPL:13C(6))	2877.39	1.44024	-;-;2		0	2.81887e-11			40.62	0.00247084	75.6	7.90464e-07
ENSMUSP00000103181	LQAKKEEIIKTLSKEEETKK	K4(ICPL:13C(6)); K5(ICPL:13C(6)); K10(ICPL:13C(6)); K14(ICPL:13C(6)); K19(ICPL:13C(6)); K20(ICPL:13C(6))	3039.61				0	1.25984e-06			22	0.139757
ENSMUSP00000103152;ENSMUSP00000119139	TAIHTAAMDMLGGSGVENQCR	C20(Carbamidomethyl)	2219				0	3.95111e-17	130.48	1.05205e-12	93.5	4.75718e-09	111.91	6.98924e-11
ENSMUSP00000103152;ENSMUSP00000119139	TAIHTAAMDMLGGSGVENQCR	M8(Oxidation); M10(Oxidation); C20(Carbamidomethyl)	2250.99				0	5.09782e-07			13.61	0.224289	35.41	0.00152502
ENSMUSP00000103152;ENSMUSP00000119139	GEIAVNALWPR		1225.67				9.8e-05	0.00260608					18.38	0.145937
ENSMUSP00000103152	IVKDSLSDEVVR	K3(ICPL:13C(6))	1470.79	1.03736	2;1;2	7.33939	0	1.30845e-08	39.17	0.00180379	50.53	0.000133652	59	1.82544e-05
ENSMUSP00000103106	STSIIATIGPASR		1273.71				0	0.000364394	21.41	0.0773364			26.79	0.0225117
ENSMUSP00000103106	LNFSHGSHEYHAESIANIR		2182.04				0	2.98288e-09	55.16	5.63861e-05	56.88	3.88695e-05	53.42	8.53103e-05
ENSMUSP00000103106	KIGPEGLVTEVEHGGFLGNR	K1(ICPL)	2214.13	1.3567	1;-;-		0	2.99037e-05	24.01	0.104263
ENSMUSP00000103106	KIGPEGLVTEVEHGGFLGNR	K1(ICPL:13C(6))	2220.15	1.007	1;-;2	40.4496	0	4.97919e-05	29.83	0.0279739			29.43	0.0316419
ENSMUSP00000103106	FGVEHNVDIIFASFVR		1849.96				0	3.39878e-05					12.54	1.18959
ENSMUSP00000103106	EAAESFATSPLSYRPVAIALDTKGPEIR	K23(ICPL:13C(6))	3100.62	0.636777	-;-;1		0	6.13576e-05					32.94	0.0163373
ENSMUSP00000103007;ENSMUSP00000095316	NILGGTVFR		976.557				0	0.000128871	38.85	0.000664615	30.63	0.00441134	22.88	0.0249886
ENSMUSP00000103007	GKLDGNQDLIR	K2(ICPL)	1333.68				0	9.00808e-05	50.1	0.000188118	53.6	8.40293e-05	43.34	0.000882866
ENSMUSP00000103007	GKLDGNQDLIR	K2(ICPL:13C(6))	1339.7	0.91295	3;3;3	5.77952	0	7.00576e-07	56.32	4.03688e-05	56.68	3.71575e-05	61.25	1.29732e-05
ENSMUSP00000103007	LVPGWTKPITIGR	K7(ICPL)	1542.88	0.847168	1;1;1	3.00429	0	4.46604e-05	34.32	0.00275522	10.19	0.765755	11.89	0.517714
ENSMUSP00000103007	LVPGWTKPITIGR	K7(ICPL:13C(6))	1548.9	0.835673	1;1;-	1.93623	0	1.7439e-05	30.91	0.00446029	25.12	0.0169185
ENSMUSP00000103007	HAHGDQYKATDFVVDR	K8(ICPL)	1963.9	0.807924	6;-;-		0	4.50951e-10	77.22	1.83032e-07	66.44	2.45145e-06	76.7	2.26624e-07
ENSMUSP00000103007	HAHGDQYKATDFVVDR	K8(ICPL:13C(6))	1969.92	0.832649	1;6;6	1.42266	0	3.44025e-10	55.9	3.54715e-05	79.89	1.49745e-07	77.54	2.6782e-07
ENSMUSP00000103007	IKVEKPVVEMDGDEMTR	K2(ICPL); K5(ICPL)	2186.02	0.926226	-;-;1		0	2.80372e-07	50.45	0.000141096	58.03	2.51837e-05	57.72	2.90756e-05
ENSMUSP00000103007	IKVEKPVVEMDGDEMTR	K2(ICPL:13C(6)); K5(ICPL:13C(6))	2198.06	0.87424	4;4;3	1.77478	0	4.35553e-07	58.48	3.51926e-05	61.76	1.64034e-05	53.44	0.000114357
ENSMUSP00000103007	IKVEKPVVEMDGDEMTR	K2(ICPL); K5(ICPL); M10(Oxidation)	2202.02	0.805773	1;-;-		0	1.11592e-06	24.9	0.0441705	41.01	0.00126008
ENSMUSP00000103007	NILGGTVFREPIICKNIPR	C14(Carbamidomethyl); K15(ICPL)	2302.25	0.90397	5;-;1	0.0936034	0	2.36909e-07	37.24	0.0033795	19.85	0.194607	27.26	0.0344855
ENSMUSP00000103007	NILGGTVFREPIICKNIPR	C14(Carbamidomethyl); K15(ICPL:13C(6))	2308.27	0.865052	-;2;3		0	6.16381e-07	24.09	0.0516673	30.03	0.0143505	32.29	0.00829233
ENSMUSP00000103007	VEEFKLKKMWKSPNGTIR	K5(ICPL:13C(6)); K7(ICPL:13C(6)); K8(ICPL:13C(6)); K11(ICPL:13C(6))	2635.38	0.731732	1;2;-	17.0829	0	1.42503e-07	39.61	0.00298103	19.45	0.340503
ENSMUSP00000103007	FKDIFQEIFDKHYKTDFDKNKIWYEHR	K2(ICPL); K11(ICPL); K14(ICPL); K19(ICPL); K21(ICPL)	4115.89	0.695873	1;-;-		0	1.09373e-05	17.19	0.45168
ENSMUSP00000103007	FKDIFQEIFDKHYKTDFDKNKIWYEHR	K2(ICPL:13C(6)); K11(ICPL:13C(6)); K14(ICPL:13C(6)); K19(ICPL:13C(6)); K21(ICPL:13C(6))	4146	0.981227	1;3;2	20.2014	0	2.07475e-09	19.75	0.431646	16.77	0.843615	37.14	0.00795971
ENSMUSP00000103007	IKVEKPVVEMDGDEMTR	K2(ICPL:13C(6)); K5(ICPL:13C(6)); M10(Oxidation)	2214.06	0.909951	-;1;-		0	8.41487e-09			46.59	0.000400187
ENSMUSP00000103007	VEEFKLKKMWKSPNGTIR	K5(ICPL); K7(ICPL); K8(ICPL); K11(ICPL)	2611.29	0.828815	-;-;1		0	5.28141e-05			11.93	2.19935	20.48	0.311139
ENSMUSP00000103007	IKVEKPVVEMDGDEMTR	K2(ICPL:13C(6)); K5(ICPL:13C(6)); M10(Oxidation); M15(Oxidation)	2230.06	0.838626	-;-;1		3.6e-05	0.000376667					30.95	0.0120931
ENSMUSP00000103007	EHQKGRPTSTNPIASIFAWTR	K4(ICPL:13C(6))	2508.29	0.895581	-;-;4		0	1.26442e-06					12.31	2.06209
ENSMUSP00000102977	VKPAPDETSFSEALLKR	K2(ICPL:13C(6)); K16(ICPL:13C(6))	2110.1	1.31362	-;1;-		0	0.000613895			21.11	0.181224
ENSMUSP00000102893	ELEEQHEVNEQLQAR		1851.88				0.000981	0.0181632	11.16	1.40487	10.23	1.74035
ENSMUSP00000102893	IKSLEKDAWR	K2(ICPL:13C(6)); K6(ICPL:13C(6))	1467.78				9.3e-05	0.000894297			20.08	0.177206
ENSMUSP00000102893	SMQDATQDHAALEAER		1772.78				0	2.15527e-05			41.64	0.000370164
ENSMUSP00000102832	GRPAATEVKIPKPR	K9(ICPL:13C(6)); K12(ICPL:13C(6))	1741.99				0	0.000308357			21.63	0.0680198
ENSMUSP00000102713	TEIIILATR		1029.63				0	7.62002e-06	38.65	0.000416198	24.33	0.0112538	33.22	0.00145311
ENSMUSP00000102713	ELTAVVQKR	K8(ICPL:13C(6))	1154.66	1.19975	-;1;1		3.6e-05	0.000295792	12.54	0.565544	31.28	0.00696324	32.11	0.00578266
ENSMUSP00000102713	ELAEDGYSGVEVR		1423.67				0	3.49779e-06	61.66	6.31163e-06	61.54	6.55861e-06	62.36	5.40111e-06
ENSMUSP00000102713	KFVADGIFKAELNEFLTR	K1(ICPL:13C(6)); K9(ICPL:13C(6))	2320.22	0.776029	1;-;1	7.17133	0	4.70975e-05	17.65	0.469848			11.23	2.05666
ENSMUSP00000102713	IRELTAVVQKR	K10(ICPL:13C(6))	1423.85	1.02612	-;-;1		0.000247	0.00396234					15.16	0.12344
ENSMUSP00000102713	KFVADGIFKAELNEFLTR	K1(ICPL); K9(ICPL)	2308.18	1.50397	-;-;1		0	1.40098e-05					20.64	0.270975
ENSMUSP00000102663	VAAALPGMESTQDR		1445.7				0	0.000317594	20.83	0.108211	13.9	0.574406	17.93	0.231128
ENSMUSP00000102561	LMMSELETR		1109.53				0	3.99516e-06	48.42	0.000174095
ENSMUSP00000102561	SAQHWLLDGFPR		1426.72				0	0.0001509	33.61	0.00709884			27.55	0.0297968
ENSMUSP00000102561	GVLHQFSGTETNR		1445.71				0	0.000196223	34.45	0.00463009	30.83	0.0106559	46.33	0.000313128
ENSMUSP00000102561	AVILGPPGSGKGTVCER	K11(ICPL); C15(Carbamidomethyl)	1802.92	1.10059	-;1;1		0	2.42083e-07	38.97	0.0027001	53.46	9.42207e-05	72.34	1.24274e-06
ENSMUSP00000102561	AVILGPPGSGKGTVCER	K11(ICPL:13C(6)); C15(Carbamidomethyl)	1808.94	1.21427	2;-;-		0	5.72796e-09	45.06	0.000687715	41.84	0.00142711	56.48	5.13909e-05
ENSMUSP00000102561	IAQNFGLQHLSSGHLLR		1891.03				0	3.02449e-11	51.95	0.000108186	61.2	1.28579e-05	67.06	3.33557e-06
ENSMUSP00000102561	YKDAAKPVIELYKSR	K2(ICPL); K6(ICPL); K13(ICPL)	2096.06	0.821092	1;1;1	11.2346	0	4.63499e-08	39.88	0.00255462	41.89	0.00162109	29.84	0.0261976
ENSMUSP00000102561	ENLKTGTEVGDVAKQYLEKGLLVPDHVITR	K4(ICPL:13C(6)); K14(ICPL:13C(6)); K19(ICPL:13C(6))	3655.93	0.97104	1;-;-		0	9.04182e-05	13.51	1.22555
ENSMUSP00000102561	VYNLDFNPPQVQGIDDITGEPLVQQEDDKPEAVAAR	K29(ICPL)	4085.97				0	8.98636e-08	54.98	0.000135494			47.37	0.000781482
ENSMUSP00000102561	VYNLDFNPPQVQGIDDITGEPLVQQEDDKPEAVAAR	K29(ICPL:13C(6))	4091.99	1.09118	1;-;1	3.52041	0	4.56944e-11	83.55	2.05993e-07			99.07	5.79137e-09
ENSMUSP00000102561	YKDAAKPVIELYKSR	K2(ICPL:13C(6)); K6(ICPL:13C(6)); K13(ICPL:13C(6))	2114.12				0	2.63036e-08					25.41	0.0611447
ENSMUSP00000102381	KEASDPQPEDVDGGLKSWR	K1(ICPL:13C(6)); K16(ICPL:13C(6))	2336.1				0	4.98568e-08			15.88	0.436402	30.33	0.0158951
ENSMUSP00000102381	IAAKFITHAPPGEFNEVFNDVR	K4(ICPL:13C(6))	2583.31	0.947416	-;-;1		0	1.90798e-06					20.03	0.312832
ENSMUSP00000102299	IRVDILENQLMDNR		1728.91				0	6.83784e-06	11.68	1.14785	35.29	0.00496946	24.94	0.054186
ENSMUSP00000102299	LFLEYTDSSYEEKR	K13(ICPL)	1884.87	0.771017	1;-;1	21.7469	0	4.43567e-09	72.31	5.37553e-07	44.53	0.000331229	84.14	3.71987e-08
ENSMUSP00000102299	LFLEYTDSSYEEKR	K13(ICPL:13C(6))	1890.88	0.816702	1;2;1	12.8944	0	3.55832e-08	91.28	1.08731e-08	68.97	1.78105e-06	78.7	1.8818e-07
ENSMUSP00000102299	FEGLKKISDYMKTSR	K5(ICPL); K6(ICPL); K12(ICPL)	2118.01	0.865984	1;1;-	13.4644	0	3.93716e-07	25.76	0.0493757	22.97	0.0885681	16.46	0.40105
ENSMUSP00000102299	FEGLKKISDYMKTSR	K5(ICPL:13C(6)); K6(ICPL:13C(6)); K12(ICPL:13C(6))	2136.07	0.771996	-;-;1		0	1.13983e-10	24.47	0.0944987			32.51	0.0148958
ENSMUSP00000102211	KIEEIKDFLLTAR	K1(ICPL:13C(6))	1686.95				0	9.89503e-05	12.59	0.636183
ENSMUSP00000102211	KIEEIKDFLLTAR	K1(ICPL); K6(ICPL)	1785.96	1.06225	2;1;1	8.91538	0	6.77722e-09	59.52	1.94334e-05	71.57	1.21561e-06	64.22	6.54706e-06
ENSMUSP00000102211	KIEEIKDFLLTAR	K1(ICPL:13C(6)); K6(ICPL:13C(6))	1798	1.44257	1;-;1	30.4232	0	7.12907e-08	51.64	8.91135e-05	59.48	1.45408e-05	52.55	7.33794e-05
ENSMUSP00000102211	YLYTLVITDKEKAEKLKQSLPPGLAVKDLK	K10(ICPL); K12(ICPL); K15(ICPL); K17(ICPL); K27(ICPL); K30(ICPL)	4032.1	0.902338	2;-;1	19.7451	0	0.000237337	11.98	2.49428			21.54	0.269359
ENSMUSP00000102211	RKDAKSVKIKKNKDNVKFKVR	K2(ICPL); K5(ICPL); K8(ICPL); K10(ICPL); K11(ICPL); K13(ICPL); K17(ICPL); K19(ICPL)	3369.71				0	4.59884e-09					20.85	0.314919
ENSMUSP00000102211	RKDAKSVKIKKNKDNVKFKVR	K2(ICPL:13C(6)); K5(ICPL:13C(6)); K8(ICPL:13C(6)); K10(ICPL:13C(6)); K11(ICPL:13C(6)); K13(ICPL:13C(6)); K17(ICPL:13C(6)); K19(ICPL:13C(6))	3417.88	0.955323	-;-;1		0	2.65119e-08					30.28	0.0114851
ENSMUSP00000102211	YLYTLVITDKEKAEKLKQSLPPGLAVKDLK	K10(ICPL:13C(6)); K12(ICPL:13C(6)); K15(ICPL:13C(6)); K17(ICPL:13C(6)); K27(ICPL:13C(6)); K30(ICPL:13C(6))	4068.21				0.000247	0.00594186					12.6	0.695169
ENSMUSP00000102198	AGKIVVNLTGR	K3(ICPL)	1232.71	1.07225	2;1;1	3.469	0	3.56053e-07	37.56	0.00152588	64.61	3.26913e-06	50.72	8.0063e-05
ENSMUSP00000102198	AGKIVVNLTGR	K3(ICPL:13C(6))	1238.73	1.11402	2;1;-	14.0593	0	3.38907e-05	33.53	0.00239549	45.83	0.000141057	49.8	5.65449e-05
ENSMUSP00000102198	LNKCGVISPR	K3(ICPL:13C(6)); C4(Carbamidomethyl)	1254.67	1.40354	3;-;-		0	0.000247981	38.74	0.00234573	49.63	0.000191107	38.79	0.00235851
ENSMUSP00000102198	KHTGGKILGFFF	K1(ICPL:13C(6)); K6(ICPL:13C(6))	1573.83	1.38465	-;-;1		0.000247	0.0040305					14.98	0.573426
ENSMUSP00000102198	QVLIRPCSKVIVR	C7(Carbamidomethyl); K9(ICPL:13C(6))	1678.99	1.1587	1;-;-		0.000262	0.00449369	14.26	0.168738
ENSMUSP00000102198	RKHTGGKILGFFF	K2(ICPL); K7(ICPL)	1717.9	1.07503	1;-;1	1.84532	0.000247	0.00597819	14.69	0.871139			27.31	0.0484887
ENSMUSP00000102198	MNVLADALKSINNAEKR	K9(ICPL); K16(ICPL)	2097.05	1.40191	1;-;1	38.1696	0	6.67811e-08	100.97	2.18355e-09	30.59	0.0237885	40.08	0.0028078
ENSMUSP00000102198	MNVLADALKSINNAEKR	K9(ICPL:13C(6)); K16(ICPL:13C(6))	2109.09	1.14562	2;2;2	10.6675	0	1.3017e-10	101.42	1.97583e-09	48.91	0.000341244	114.95	8.49307e-11
ENSMUSP00000102198	QFGFIVLTTSAGIMDHEEAR		2222.09				0	5.15551e-05	21.79	0.178467
ENSMUSP00000102198	FDVQLKDLEKWQNNLLPSR	K6(ICPL:13C(6)); K10(ICPL:13C(6))	2565.33				0	5.90108e-08			66.95	6.71107e-06	26.98	0.0656465
ENSMUSP00000102198	KHTGGKILGFFF	K1(ICPL); K6(ICPL)	1561.8	1.0868	-;-;1		0.000911	0.0243099					13.07	0.848259
ENSMUSP00000102198	MNVLADALKSINNAEKR	M1(Oxidation); K9(ICPL:13C(6)); K16(ICPL:13C(6))	2125.09				0	4.80836e-07					41.16	0.00212453
ENSMUSP00000102104	HDGAFLIR		928.499				0	0.000113353			27.36	0.0276399	27.46	0.0270107
ENSMUSP00000102033	SPRPQDLIR		1081.61				0	1.91189e-05	24.29	0.0238331			31.64	0.00438712
ENSMUSP00000102033	KAVKHAEELER	K1(ICPL:13C(6)); K4(ICPL:13C(6))	1531.81	1.13574	1;-;-		0	1.2688e-05	26.94	0.0329752
ENSMUSP00000101979	EIKKILEFLGR	K3(ICPL); K4(ICPL)	1555.86	0.958197	-;1;1		0	5.90353e-05	42.82	0.000561576	34.56	0.00374441	44.38	0.000404877
ENSMUSP00000101979	EIKKILEFLGR	K3(ICPL:13C(6)); K4(ICPL:13C(6))	1567.9	0.904601	2;1;1	17.5593	0	2.79911e-06	44.82	0.000290057	37.44	0.00156863	38.74	0.00116284
ENSMUSP00000101979	THPVLYLFYEDMKENPKR	K13(ICPL); K17(ICPL)	2490.19	0.963009	1;-;1	1.38556	0	1.58071e-08	33.64	0.0095153	13.48	1.02763	49.55	0.0002357
ENSMUSP00000101979	THPVLYLFYEDMKENPKR	K13(ICPL:13C(6)); K17(ICPL:13C(6))	2502.23	1.07494	2;1;2	8.36787	0	8.40485e-09	37.95	0.0050903	18.25	0.474307	37.85	0.00533192
ENSMUSP00000101979	IPFLEFSCPGVPPGLETLKETPAPR	C8(Carbamidomethyl); K19(ICPL)	2857.46	1.02994	1;-;-		0.000469	0.00707639	10.73	3.23319
ENSMUSP00000101979	IPFLEFSCPGVPPGLETLKETPAPR	C8(Carbamidomethyl); K19(ICPL:13C(6))	2863.48	1.02647	1;2;2	4.54918	0	2.8696e-08	56.27	8.63935e-05	35.44	0.0106302	44.16	0.00140821
ENSMUSP00000101979	IIKTHLPLSLLPQSLLDQKIKVIYVAR	K3(ICPL); K19(ICPL); K21(ICPL)	3414.97	0.951104	3;-;1	0.294406	0	2.12202e-11	45.31	0.000119249	38.87	0.000603188	61.5	2.69019e-06
ENSMUSP00000101979	IIKTHLPLSLLPQSLLDQKIKVIYVAR	K3(ICPL:13C(6)); K19(ICPL:13C(6)); K21(ICPL:13C(6))	3433.03	0.953543	1;2;2	12.8715	0	7.09958e-14	58.74	1.53708e-06	50.38	9.62032e-06	72.77	5.8129e-08
ENSMUSP00000101961	AEVLGHKTPEPVPR	K7(ICPL:13C(6))	1640.88	0.567506	1;-;1	3.31072	6.7e-05	0.00131652	26.07	0.0386825			17.39	0.28544
ENSMUSP00000101961	AEVLGHKTPEPVPR	K7(ICPL)	1634.86	0.397595	-;1;-		0	1.29918e-05			12.55	1.12015
ENSMUSP00000101961	LSKVVNIVPVIAKADTLTLEER	K3(ICPL); K13(ICPL)	2618.45				0	2.12962e-05			45.99	0.000294568
ENSMUSP00000101961	LSKVVNIVPVIAKADTLTLEER	K3(ICPL:13C(6)); K13(ICPL:13C(6))	2630.49	0.992816	-;1;2		0	2.6879e-08			46.08	0.000189885	49.32	9.00515e-05
ENSMUSP00000101961	IPKTIEIKSITHDIEEKGVR	K3(ICPL:13C(6)); K8(ICPL:13C(6)); K17(ICPL:13C(6))	2639.43	1.11766	-;1;-		0	1.00679e-06			20.05	0.165583
ENSMUSP00000101961	LVNEKFR	K5(ICPL:13C(6))	1016.56				0.000302	0.0087884					16.18	0.24822
ENSMUSP00000101961	LEPRPSVAEVPYR		1512.82				0.000247	0.00548138					20.76	0.133894
ENSMUSP00000101926	GPFADENFKLR	K9(ICPL:13C(6))	1404.7				0	5.58859e-07			62.68	8.14661e-06
ENSMUSP00000101898	INKELSDLAR	K3(ICPL)	1263.67				0	1.11517e-05	17.47	0.34111			37.8	0.00336896
ENSMUSP00000101898	INKELSDLAR	K3(ICPL:13C(6))	1269.69	0.924894	1;1;2	5.84493	0	6.28498e-07	46.05	0.00034888	53.56	7.13699e-05	54.76	5.73144e-05
ENSMUSP00000101898	IYKTDRDKYNR	K3(ICPL:13C(6)); K8(ICPL:13C(6))	1693.85	0.849771	-;1;-		0.000708	0.00937953			16.76	0.487093	17.13	0.468614
ENSMUSP00000101898	IYKTDRDKYNR	K3(ICPL); K8(ICPL)	1681.81	0.787209	-;1;-		0.000462	0.00455083			14.61	0.558692
ENSMUSP00000101879	TIQWVQAMEGSAR		1476.73				3.6e-05	0.000283637	14.91	0.503645	16.18	0.373535	27	0.0310263
ENSMUSP00000101860	KLDYGQHVVAGTPGR	K1(ICPL:13C(6))	1708.89	1.12967	-;1;1		0	3.88232e-07			22.1	0.133801	29.53	0.0228988
ENSMUSP00000101794	TQGVSTTDLVGR		1233.64				0	1.21507e-06	47.63	0.000264916	56.08	4.03197e-05	50.38	0.000146595
ENSMUSP00000101794	YKGKNYPIMNLHER	K2(ICPL:13C(6)); K4(ICPL:13C(6))	1984.99	1.11843	2;1;1	23.5227	0	1.51812e-07	29.42	0.0240576	24.93	0.0670048	24.88	0.0664804
ENSMUSP00000101794	MLLVTKAHHSSQEMSSEYR	K6(ICPL:13C(6))	2345.11	1.54847	1;-;-		0	3.21548e-05	24.1	0.082283	18.25	0.310469	28.67	0.0287962
ENSMUSP00000101794	YKGKNYPIMNLHER	K2(ICPL); K4(ICPL)	1972.95				0	1.39257e-05			11.37	1.82	11.65	1.67558
ENSMUSP00000101794	VWCDGCYDMVHYGHSNQLR	C3(Carbamidomethyl); C6(Carbamidomethyl)	2396.99				0	1.70366e-05			27.94	0.00224972	24.98	0.00476531
ENSMUSP00000101748	KHGLTHEELKSPR	K1(ICPL); K10(ICPL)	1741.88	0.957668	1;-;2	10.8462	0	8.11914e-06	40.07	0.00221895			46.74	0.000475572
ENSMUSP00000101748	KHGLTHEELKSPR	K1(ICPL:13C(6)); K10(ICPL:13C(6))	1753.92	1.04488	1;2;-	14.3808	0	8.55372e-08	24.88	0.101427	13.49	1.47074	29.15	0.0399517
ENSMUSP00000101748	SIFQHIQSAQSQR		1529.78				0	1.84117e-05			27.7	0.0292947
ENSMUSP00000101727	IGGNEGIDVPIPR		1336.72				0	1.24253e-05					22.36	0.0725956
ENSMUSP00000101651	LDDCGLTEVR	C4(Carbamidomethyl)	1177.55				0	8.73758e-08	63.3	5.16847e-06	67.57	1.88983e-06	76.44	2.11097e-07
ENSMUSP00000101651	WTELLPLIQQYEVVR		1887.03				6.7e-05	0.000909228	11.3	1.32695	15.45	0.431929	32.48	0.00844581
ENSMUSP00000101651	VKADFKELVLSNNDLHEPGVR	K2(ICPL); K6(ICPL)	2590.3	0.705038	1;1;-	1.23282	0	8.24742e-08	39.8	0.00305762	36.84	0.00624148	34.82	0.00995421
ENSMUSP00000101651	AKQSLKELSLASNELKDEGAR	K2(ICPL); K6(ICPL); K16(ICPL)	2602.29	0.950611	-;1;1		0	3.1267e-10	34.66	0.00983191	40.69	0.00246972	64.39	1.05535e-05
ENSMUSP00000101651	AKQSLKELSLASNELKDEGAR	K2(ICPL:13C(6)); K6(ICPL:13C(6)); K16(ICPL:13C(6))	2620.35	0.965565	1;-;1	2.78745	0	2.00496e-10	63.84	1.14208e-05			57.18	5.31206e-05
ENSMUSP00000101651	ALEEERPSLR		1199.64				0.000247	0.00346679			23.05	0.0862083	26.32	0.0406022
ENSMUSP00000101651	LEKLQLEYCNLTATSCEPLASVLR	K3(ICPL:13C(6)); C9(Carbamidomethyl); C16(Carbamidomethyl)	2919.47				0	2.07284e-05			19.89	0.410261
ENSMUSP00000101591	KNIEEKSGMEGR	K1(ICPL); K6(ICPL)	1587.72				0	2.96375e-08	61.84	4.35333e-06	35.51	0.00203863	60.98	5.30666e-06
ENSMUSP00000101591	ANLKQVKKEDTEKER	K4(ICPL); K7(ICPL); K8(ICPL); K13(ICPL)	2236.08				0	1.22e-07	17.49	0.346673	19.4	0.222168	27.34	0.0358855
ENSMUSP00000101591	MSADAMLKALLGSKHKVCMDLR	K8(ICPL); K14(ICPL); K16(ICPL); C18(Carbamidomethyl)	2790.33	0.0231195	-;-;1		0	8.061e-07	33.24	0.0119983	21.64	0.193993	50.61	0.000218544
ENSMUSP00000101591	RQHLKSVMLQIAATELEKEESR	K5(ICPL); K18(ICPL)	2806.43				0	2.76547e-07	35.87	0.00909757	40.16	0.00348906
ENSMUSP00000101591	GKFKRPPLR	K2(ICPL); K4(ICPL)	1308.73				0.003178	0.0560849			10.8	0.781858
ENSMUSP00000101591	GKFKRPPLRR	K2(ICPL); K4(ICPL)	1464.83				0.008131	0.206344					11.01	0.744951
ENSMUSP00000101562	EMKKKILAER	K3(ICPL); K4(ICPL); K5(ICPL)	1560.8				9.3e-05	0.000905763	21.85	0.123442	32.98	0.00991896	22.83	0.105281
ENSMUSP00000101562	KPLNIDHLSDDKLR	K1(ICPL); K12(ICPL)	1873.95				0	4.01288e-07	52.24	0.00014299	35.51	0.00674856	36.56	0.00524401
ENSMUSP00000101562	KKEEEELIALKER	K1(ICPL); K2(ICPL); K11(ICPL)	1929.97				0	3.72684e-08	38.01	0.00438796	36.98	0.00555239	40.08	0.00271453
ENSMUSP00000101562	RKPLNIDHLSDDKLR	K2(ICPL); K13(ICPL)	2030.06				0	4.28183e-07	41.05	0.00238712	40.07	0.00294219	41.69	0.00199904
ENSMUSP00000101562	QNKDLMELQALIDSHFEAR	K3(ICPL)	2363.15				0	4.57891e-06	37.18	0.00507278	23.51	0.12211	18.58	0.382745
ENSMUSP00000101562	IDQAQKHSKKAGATAKGKVGGR	K6(ICPL); K9(ICPL); K10(ICPL); K16(ICPL); K18(ICPL)	2761.37				0	5.74682e-08	22.58	0.194607	26.29	0.0842343	17.12	0.703571
ENSMUSP00000101562	SRIDQAQKHSKKAGATAKGKVGGR	K8(ICPL); K11(ICPL); K12(ICPL); K18(ICPL); K20(ICPL)	3004.5				0	3.66833e-07	41.04	0.0027586	18.02	0.552953	59.65	3.80458e-05
ENSMUSP00000101562	RAEDDMKKKKALSSMGANYSSYLAKADQKR	K7(ICPL); K8(ICPL); K9(ICPL); K10(ICPL); K25(ICPL); K29(ICPL)	4020.85				0	2.43652e-09	58.13	3.52237e-05	29.32	0.0257875	54.24	8.62652e-05
ENSMUSP00000101562	QKYDITTLR	K2(ICPL)	1242.65	0.14209	-;-;1		0.001069	0.0308373			15.4	0.442699	13.99	0.612503
ENSMUSP00000101562	DKAKELWDTLYQLETDKFEFGEKLKR	K2(ICPL); K4(ICPL); K17(ICPL); K23(ICPL); K25(ICPL)	3755.79				0	6.12286e-09			47.51	0.000642257
ENSMUSP00000101301	VEKDGLILTSR	K3(ICPL)	1335.73	0.952127	1;-;1	4.90988	0	1.09189e-07	73.78	5.73747e-07	55.96	3.47313e-05	57.19	2.58785e-05
ENSMUSP00000101301	AGIKVTVAGLAGKDPVQCSR	K4(ICPL); K13(ICPL); C18(Carbamidomethyl)	2237.15	1.01101	1;1;-	12.7733	0	3.44837e-10	49.31	0.000276638	31.29	0.0175724	45.59	0.000658398
ENSMUSP00000101301	AGIKVTVAGLAGKDPVQCSR	K4(ICPL:13C(6)); K13(ICPL:13C(6)); C18(Carbamidomethyl)	2249.19	1.18785	-;1;1		0	2.25972e-11	34.19	0.0098696	98.99	3.19873e-09	82.26	1.5927e-07
ENSMUSP00000101301	RAGIKVTVAGLAGKDPVQCSR	K5(ICPL:13C(6)); K14(ICPL:13C(6)); C19(Carbamidomethyl)	2405.29	1.09511	1;1;1	6.06818	0	2.58686e-11	47.62	0.000394398	69.29	2.60251e-06	80.25	2.08165e-07
ENSMUSP00000101301	VEKDGLILTSR	K3(ICPL:13C(6))	1341.75	0.982333	-;1;-		0	5.7953e-08			73.5	5.98556e-07	56.48	3.03622e-05
ENSMUSP00000101301	RAGIKVTVAGLAGKDPVQCSR	K5(ICPL); K14(ICPL); C19(Carbamidomethyl)	2393.25				0	1.79418e-13			49	0.000394673	62.85	1.61347e-05
ENSMUSP00000101220	VYDQVVEDLNSR		1436.7				0	1.38524e-05					46.49	0.000289461
ENSMUSP00000101053	ASFTKSLQGIR	K5(ICPL)	1312.7	0.637674	1;-;1	10.3885	0	0.00033461	24.49	0.0499662	31.22	0.0109866	21.07	0.112554
ENSMUSP00000101053	DIANSPHELYR		1314.64				0	3.81571e-05	40.29	0.00136569	19.71	0.156082	46.22	0.000334294
ENSMUSP00000101053	LGAIAKDPKSETGTR	K6(ICPL); K9(ICPL)	1753.88	0.496654	1;1;2	8.5844	0	8.81699e-05	16.81	0.404391	46.7	0.00042011	40.02	0.0019062
ENSMUSP00000101053	ASFTKSLQGIR	K5(ICPL:13C(6))	1318.72	0.645333	-;1;-		0	0.000204099			36.7	0.00266176
ENSMUSP00000101053	LGAIAKDPKSETGTR	K6(ICPL:13C(6)); K9(ICPL:13C(6))	1765.92	0.517467	-;1;-		0	0.000210325			18.91	0.281478
ENSMUSP00000101053	VGVVQYSHEGTFEAIR		1791.9				0	9.35848e-09			57.72	3.95563e-05	39.84	0.00238113
ENSMUSP00000101053	YGGLHFSDQVEVFSPPGSDR		2194.02				0.004762	0.091181			11.14	0.8845
ENSMUSP00000101053	NNYATMRPDSTEIDQDTINR		2354.07				0	2.63948e-07			39.23	0.00164173	29.77	0.0149723
ENSMUSP00000101020	SGEYSCIFLPEPVGR	C6(Carbamidomethyl)	1710.82				0	5.66547e-06	19.27	0.181597	28.43	0.0220348	44.95	0.000478235
ENSMUSP00000101020	GGKVLQEDTLPDLHTKYIVDADDR	K3(ICPL); K16(ICPL)	2908.41	1.02081	3;2;1	6.16899	0	3.06732e-11	46.64	0.000642724	52.96	0.000147954	58.51	4.16445e-05
ENSMUSP00000101020	GGKVLQEDTLPDLHTKYIVDADDR	K3(ICPL:13C(6)); K16(ICPL:13C(6))	2920.45	1.05941	1;2;3	6.41124	0	4.2434e-10	46.6	0.000817129	54.51	0.000130094	65.56	1.05212e-05
ENSMUSP00000101020	RKPDQTLDEDDPGAAPLKGSGTHMNDKDKNVR	K2(ICPL); K18(ICPL); K27(ICPL); K29(ICPL)	3925.79	0.737019	-;-;1		0	1.44302e-09	42.08	0.00091987	43.37	0.000715699	54.98	5.36892e-05
ENSMUSP00000101020	RKPDQTLDEDDPGAAPLKGSGTHMNDKDKNVR	K2(ICPL:13C(6)); K18(ICPL:13C(6)); K27(ICPL:13C(6)); K29(ICPL:13C(6))	3949.88	0.699787	1;2;1	17.0115	0	5.62538e-09	51.69	0.00021549	54.6	0.000121531	14.21	1.28398
ENSMUSP00000101002	LQDWALR		901.488				0.000129	0.00300945	33.42	0.00641533	32.13	0.00863414	37.33	0.00260747
ENSMUSP00000101002	VLEVGFGMAIAASR	M8(Oxidation)	1436.76				0	5.90428e-09	39.68	0.00155549	55.94	3.64197e-05	65.53	4.15649e-06
ENSMUSP00000101002	WETPYMHALAAAAASR		1745.84				0	5.02027e-08	23.13	0.0848781	30.65	0.0151535	32.21	0.010731
ENSMUSP00000101002	WETPYMHALAAAAASR	M6(Oxidation)	1761.83				0	1.51233e-06	23.25	0.0693167			43.93	0.000594727
ENSMUSP00000101002	YYAFPQMITPLVTKH	K14(ICPL:13C(6))	1919.98	1.02131	2;-;1	3.65647	0	3.38879e-07	16.02	0.553826			28.39	0.0311486
ENSMUSP00000101002	AAPAAYDASDTHLQILGKPVMER	K18(ICPL)	2559.27	1.53773	1;-;-		0	3.33391e-07	30.82	0.023141			39	0.00359423
ENSMUSP00000101002	AAPAAYDASDTHLQILGKPVMER	K18(ICPL:13C(6))	2565.29	1.03198	1;1;1	9.96685	0	7.71341e-11	42.24	0.00192842	23.87	0.129624	49.78	0.000332946
ENSMUSP00000101002	VQQAPIEEHWIIECNDGVFQR	C14(Carbamidomethyl)	2568.22				0	1.04959e-07	58.63	3.39293e-05	37.2	0.00469696	35.49	0.00696333
ENSMUSP00000101002	VLEVGFGMAIAASR		1420.76				0	2.12018e-05			29.65	0.0138743	37.29	0.0023983
ENSMUSP00000101002	YYAFPQMITPLVTKH	K14(ICPL)	1913.96	1.01593	-;-;1		0	1.5194e-06					23.39	0.106747
ENSMUSP00000100992	ALDLAAGITR		1000.58				0	0.000739812	29.82	0.00948509			13.65	0.392682
ENSMUSP00000100968	HRPSGLIMAR		1137.63				0	0.00010119	26.09	0.0290323	35.09	0.00379434	22.94	0.0622495
ENSMUSP00000100968	KLIHLEIKPAVR	K1(ICPL:13C(6)); K8(ICPL:13C(6))	1638.99	1.1423	1;-;-		0.000226	0.00308609	13.58	0.1491
ENSMUSP00000100968	KLIHLEIKPAVR	K1(ICPL); K8(ICPL)	1626.95	0.873062	-;1;-		0.000174	0.00305172			14.16	0.230224
ENSMUSP00000100924	VHENEITKLR	K8(ICPL)	1343.71	0.55038	2;1;2	17.4156	0	4.56687e-05	33.61	0.00884089	48.86	0.000264585	49.1	0.000249129
ENSMUSP00000100924	VHENEITKLR	K8(ICPL:13C(6))	1349.73	0.614168	-;1;-		0	1.6813e-05	14.62	0.560859	11.59	1.17882	33.21	0.00775985
ENSMUSP00000100924	KASYSAVSLYGNPVR	K1(ICPL)	1716.87	0.574263	1;-;1	4.94659	0	1.37992e-10	16.04	0.477861	54.92	6.49045e-05	66.89	3.79615e-06
ENSMUSP00000100924	LYLSKNQLKELPEKMPR	K5(ICPL); K9(ICPL); K14(ICPL)	2402.24	0.494048	1;-;2	7.42313	0	4.80414e-06	26.33	0.0669326			16.93	0.524156
ENSMUSP00000100924	ELHLDNNKLLR	K8(ICPL)	1469.79	0.498069	-;1;1		0.000133	0.00205419			13.28	0.749481	11.64	1.09335
ENSMUSP00000100924	KASYSAVSLYGNPVR	K1(ICPL:13C(6))	1722.89	0.703451	-;1;1		0	2.38492e-10			77.2	3.75376e-07	12.4	1.09046
ENSMUSP00000100924	LYLSKNQLKELPEKMPR	K5(ICPL:13C(6)); K9(ICPL:13C(6)); K14(ICPL:13C(6))	2420.29	0.559349	-;1;-		0	3.50634e-07			28.73	0.0282002	14.89	0.689222
ENSMUSP00000100924	YWEIFPNTFR		1372.67				0.000674	0.0146419					22.43	0.10258
ENSMUSP00000100863	KSEDDEKLKKR	K1(ICPL); K7(ICPL); K9(ICPL); K10(ICPL)	1795.84	0.443533	1;-;-		0	0.000663007	10.75	1.08119
ENSMUSP00000100863	GLETKGIKQDLINR	K5(ICPL:13C(6)); K8(ICPL:13C(6))	1806.99	0.855429	-;-;1		0	6.80814e-05	21.58	0.106339			36.62	0.00326656
ENSMUSP00000100863	FGIVTSSAGTGTTEDTEAKKR	K19(ICPL:13C(6)); K20(ICPL:13C(6))	2378.16	0.631049	1;-;-		0.000262	0.00456988	15.42	0.650232
ENSMUSP00000100863	FNVPVSLESKKAAR	K10(ICPL); K11(ICPL)	1755.92	0.83664	-;1;-		0	3.4841e-05			21.32	0.162339	28.2	0.0332983
ENSMUSP00000100863	FNVPVSLESKKAAR	K10(ICPL:13C(6)); K11(ICPL:13C(6))	1767.96	0.77442	-;-;1		0	7.98993e-07					37.89	0.00236517
ENSMUSP00000100730	ACGVSRPVIACSVTIKEGSQLKQQIQSIQQSIER	C2(Carbamidomethyl); C11(Carbamidomethyl); K16(ICPL); K22(ICPL)	4009.04				0	3.94834e-05	17.96	0.757391			10.93	3.76979
ENSMUSP00000100730	ACGVSRPVIACSVTIKEGSQLKQQIQSIQQSIER	C2(Carbamidomethyl); C11(Carbamidomethyl); K16(ICPL:13C(6)); K22(ICPL:13C(6))	4021.07	1.12571	1;1;1	2.11124	0	8.55283e-06	24.95	0.134514	14.52	1.40567	22.84	0.194739
ENSMUSP00000100711	LAPDYDALDVANKIGII	K13(ICPL)	1906	1.02617	1;-;2	1.09908	0	6.88729e-05	12.93	1.08233			44.21	0.000796561
ENSMUSP00000100711	LAPDYDALDVANKIGII	K13(ICPL:13C(6))	1912.02	1.04989	1;1;-	4.99543	0	0.000274658	25.52	0.0537241	11.49	1.35884	30.87	0.0156736
ENSMUSP00000100667	GRPKGSKNKGAAKTR	K4(ICPL); K7(ICPL); K9(ICPL); K13(ICPL)	1976	0.612179	1;2;1	20.6766	0	0.000224781	13.06	1.23578	12.64	1.37759	29.86	0.0262321
ENSMUSP00000100667	KQPPVSPGTALVGSQKEPSEVPTPKRPR	K1(ICPL); K16(ICPL); K25(ICPL)	3282.7	0.616266	1;-;1	9.97552	0	2.03993e-07	10.24	3.68086	39.06	0.00459411	24.48	0.119768
ENSMUSP00000100667	MSESGSKSSQPLASKQEKDGTEKR	M1(Oxidation); K15(ICPL); K18(ICPL); K23(ICPL)	2926.33				0	8.44726e-06			33.3	0.00647813
ENSMUSP00000100667	KQPPVSPGTALVGSQKEPSEVPTPKRPR	K1(ICPL:13C(6)); K16(ICPL:13C(6)); K25(ICPL:13C(6))	3300.76	0.83526	-;1;-		0	1.82693e-10			82.5	1.43678e-07
ENSMUSP00000100564	AMVLDLR		817.46				0.004349	0.0802694			36.12	0.00324976	26.72	0.0231967
ENSMUSP00000100564	KQVDVFR	K1(ICPL)	996.525	1.16968	1;1;-	10.381	0	0.000426016	34.03	0.00468509	19.97	0.119321	31.47	0.00834038
ENSMUSP00000100564	KQVDVFR	K1(ICPL:13C(6))	1002.55				0.000185	0.0016397	33.62	0.00532275	17.91	0.198215	27.5	0.0217839
ENSMUSP00000100564	ALVHERDEAAYGALR		1670.86				0	6.62595e-06	33.39	0.00923156	20.26	0.186023	35.52	0.00535838
ENSMUSP00000100564	QNLFQEADDFLCTFLPR	C12(Carbamidomethyl)	2114				0	9.8452e-07	34.29	0.00664719	51.86	0.000121855	52.57	9.82196e-05
ENSMUSP00000100564	KIISLSQLLQEDSLNVADLSSLR	K1(ICPL:13C(6))	2653.45	1.2375	1;-;-		0	3.06374e-05	21.17	0.130998
ENSMUSP00000100564	GDAVAKASKDTHVMDYR	K6(ICPL:13C(6)); K9(ICPL:13C(6))	2085.98	1.18238	-;-;1		6.7e-05	0.00138528					13.19	0.79156
ENSMUSP00000100505	ELEKKFSGKHVVFIAQR	K4(ICPL); K5(ICPL); K9(ICPL)	2331.2	0.941149	1;-;-		0	7.35659e-05	18.76	0.363879			12.87	1.42789
ENSMUSP00000100505	KAIIIFVPVPQLKSFQKIQVR	K1(ICPL:13C(6)); K13(ICPL:13C(6)); K17(ICPL:13C(6))	2785.64	1.14677	-;1;1		0	3.95666e-09	14.71	0.0777549	10.17	0.230787	48.6	2.82979e-05
ENSMUSP00000100505	KAIIIFVPVPQLKSFQKIQVR	K1(ICPL); K13(ICPL); K17(ICPL)	2767.58				0	1.44377e-05					22.63	0.0321997
ENSMUSP00000100481	KVVGCSCVVVKDYGKESQAKDVIEEYFKCKK	K1(ICPL); C5(Carbamidomethyl); C7(Carbamidomethyl); K11(ICPL); K15(ICPL); K20(ICPL); K28(ICPL); C29(Carbamidomethyl); K30(ICPL); K31(ICPL)	4415.98				9.3e-05	0.00077523	12.47	1.06736	10.54	1.0906
ENSMUSP00000100481	KVVGCSCVVVKDYGKESQAKDVIEEYFKCKK	K1(ICPL:13C(6)); C5(Carbamidomethyl); C7(Carbamidomethyl); K11(ICPL:13C(6)); K15(ICPL:13C(6)); K20(ICPL:13C(6)); K28(ICPL:13C(6)); C29(Carbamidomethyl); K30(ICPL:13C(6)); K31(ICPL:13C(6))	4458.14	1.06255	1;-;-		0	2.78233e-07	30.03	0.0450378
ENSMUSP00000100074	KTPCGEGSKTWDR	K1(ICPL); C4(Carbamidomethyl); K9(ICPL)	1731.75	0.989405	1;-;-		0	1.09755e-05	39.45	0.000510755	36.31	0.00104078	28.95	0.00573076
ENSMUSP00000100074	KTPCGEGSKTWDR	K1(ICPL:13C(6)); C4(Carbamidomethyl); K9(ICPL:13C(6))	1743.79	1.05534	3;2;3	3.57864	0	1.46601e-07	46.64	0.000177752	66.99	1.63989e-06	65.86	2.12723e-06
ENSMUSP00000100074	NVKSLEKVCADLIR	K3(ICPL); K7(ICPL); C9(Carbamidomethyl)	1854.95	1.27003	1;-;1	12.3934	0	1.31213e-09	52.38	0.000122267	55.16	6.58345e-05	81.52	1.49747e-07
ENSMUSP00000100074	NVKSLEKVCADLIR	K3(ICPL:13C(6)); K7(ICPL:13C(6)); C9(Carbamidomethyl)	1866.99	1.16207	2;2;2	7.58299	0	1.41776e-08	58.32	2.82684e-05	76.96	3.69518e-07	74.25	7.21608e-07
ENSMUSP00000100074	GAKEKNLKVKGPVR	K3(ICPL); K5(ICPL); K8(ICPL); K10(ICPL)	1944.02	0.898416	1;1;1	6.65201	0	2.9948e-06	63.38	1.0883e-05	44.98	0.000789453	56.39	5.64853e-05
ENSMUSP00000100074	GAKEKNLKVKGPVR	K3(ICPL:13C(6)); K5(ICPL:13C(6)); K8(ICPL:13C(6)); K10(ICPL:13C(6))	1968.1	0.92793	3;1;4	9.46247	0	2.00253e-07	74.35	4.49921e-07	81.09	9.49205e-08	74.28	4.31104e-07
ENSMUSP00000100074	MAFKDTGKTPVEPEVAIHR	M1(Oxidation); K8(ICPL)	2247.12				0	4.24871e-06	63.32	1.18026e-05	67.59	4.41548e-06	58.98	3.14919e-05
ENSMUSP00000100074	KTPCGEGSKTWDRFQMR	K1(ICPL:13C(6)); C4(Carbamidomethyl); K9(ICPL:13C(6))	2306.06	1.09126	1;-;-		0.000502	0.00853573	24.77	0.0518478
ENSMUSP00000100074	MPTKTLR	K4(ICPL:13C(6))	957.528	0.852044	-;-;1		0.000358	0.00988459					20.96	0.10021
ENSMUSP00000100067	VISSIEQKTDTSDKKLQLIKDYR	K8(ICPL); K14(ICPL); K15(ICPL); K20(ICPL)	3128.58	0.967342	1;-;1	9.42	0	4.38312e-05	15.74	1.02407			10.34	3.69879
ENSMUSP00000100067	KQTIENSQGAYQEAFDISKKEMQPTHPIR	K1(ICPL:13C(6)); K19(ICPL:13C(6)); K20(ICPL:13C(6))	3707.8	1.44279	1;1;2	14.8002	0	6.55161e-09	26.01	0.0978636	43.61	0.00170721	38.64	0.00565556
ENSMUSP00000100067	YLAEVACGDDR	C7(Carbamidomethyl)	1268.56				0	0.000175623			41.47	0.000274448	28.61	0.005922
ENSMUSP00000100067	VISSIEQKTDTSDKKLQLIKDYR	K8(ICPL:13C(6)); K14(ICPL:13C(6)); K15(ICPL:13C(6)); K20(ICPL:13C(6))	3152.64	1.19026	-;1;1		0	1.67198e-05			29.27	0.0305225	31.93	0.0199416
ENSMUSP00000100067	NLLSVAYKNVVGGR	K8(ICPL:13C(6))	1600.89	1.08438	-;-;2		0	2.31039e-07					41.83	0.00112857
ENSMUSP00000100047	PEPVKSVPAPKKGSKKAVTKAQKKDGKKR	N-Term(ICPL:13C(6)); K5(ICPL:13C(6)); K11(ICPL:13C(6)); K12(ICPL:13C(6)); K15(ICPL:13C(6)); K16(ICPL:13C(6)); K20(ICPL:13C(6)); K23(ICPL:13C(6)); K24(ICPL:13C(6)); K27(ICPL:13C(6)); K28(ICPL:13C(6))	4337.3				0.00596	0.156751					19.61	0.289351
ENSMUSP00000100045	NLVVIPKSVTPVR	K7(ICPL:13C(6))	1532.92	0.780352	-;1;1		9.3e-05	0.00102565			35.28	0.000652263	10.32	0.204373
ENSMUSP00000100038	LPFSIR		732.44				0.003178	0.0781816	22.85	0.020752	19.25	0.0475401	20.57	0.030695
ENSMUSP00000100038	IDFEKEPLGVNAQGR	K5(ICPL)	1777.88	1.00119	-;1;-		0	1.92935e-05	26.81	0.0424194	32.19	0.0124715
ENSMUSP00000100038	IDFEKEPLGVNAQGR	K5(ICPL:13C(6))	1783.91	1.11427	1;-;1	2.3156	0	7.35709e-07	42.47	0.00111549	24.44	0.0712304	30.5	0.0171566
ENSMUSP00000100038	RADSLQKNQDLEFER	K7(ICPL:13C(6))	1959.96	1.04613	1;1;1	11.1369	0	1.7941e-06	39.16	0.00262092	46	0.000542567	36.38	0.00497111
ENSMUSP00000100038	VILQDFTGVPAVVDFAAMR		2049.09				0	6.95853e-09	39.8	0.00231415	36.72	0.00473511	40.46	0.00194741
ENSMUSP00000100038	ANYLASPPLVIAYAIAGTVR		2060.16				0	9.48189e-09	42.76	0.000579981	61.52	7.71639e-06	67.87	1.78819e-06
ENSMUSP00000100038	YQQAGLPLIVLAGKEYGSGSSR	K14(ICPL)	2399.24				0	0.000580536	14.39	0.978931	20.4	0.248067
ENSMUSP00000100038	YQQAGLPLIVLAGKEYGSGSSR	K14(ICPL:13C(6))	2405.26	1.13644	1;2;1	11.499	0	7.29105e-11	62.04	1.65671e-05	66.95	5.38904e-06	46.41	0.000613683
ENSMUSP00000100038	MKNPFAHLAEPLDAAQPGKR	N-Term(ICPL); K2(ICPL); K19(ICPL)	2506.21				0	9.8795e-06	16.34	0.578361	24.6	0.0863375	10.68	2.11201
ENSMUSP00000100038	MKNPFAHLAEPLDAAQPGKR	N-Term(ICPL:13C(6)); K2(ICPL:13C(6)); K19(ICPL:13C(6))	2524.27				0	5.30785e-05	23.34	0.152706	24.31	0.11973	28.78	0.0430411
ENSMUSP00000100038	QVGVVGKFVEFFGPGVAQLSIADR	K7(ICPL:13C(6))	2631.4	1.14856	1;-;1	6.67117	0	6.48535e-05	18.43	0.326574			14.24	0.873953
ENSMUSP00000100038	SNLVGMGVIPLEYLPGETADSLGLTGR		2759.43				0	5.41337e-06	50.98	0.000245782	44.36	0.00117077	44.16	0.00107054
ENSMUSP00000100038	DAVKKLGGNPEKINPVCPADLVIDHSIQVDFNR	K4(ICPL); K5(ICPL); K12(ICPL); C17(Carbamidomethyl)	3973.97				0	0.000325775	26.53	0.10205			22.33	0.269003
ENSMUSP00000100038	DAVKKLGGNPEKINPVCPADLVIDHSIQVDFNR	K4(ICPL:13C(6)); K5(ICPL:13C(6)); K12(ICPL:13C(6)); C17(Carbamidomethyl)	3992.03	1.02772	1;-;1	1.28397	0	8.3919e-08	28.77	0.0676307			38.22	0.00769123
ENSMUSP00000100038	FFNLNKLEDSR	K6(ICPL:13C(6))	1493.75	0.983642	-;1;-		0	0.000333752			16.79	0.344481
ENSMUSP00000100038	FEFLKWGSQAFCNMR	K5(ICPL:13C(6)); C12(Carbamidomethyl)	2031.93	0.906984	-;1;-		0	8.97858e-05			21.78	0.0673699
ENSMUSP00000100038	DWAAKGPFLLGIKAVLAESYER	K5(ICPL:13C(6)); K13(ICPL:13C(6))	2656.4	1.14484	-;1;1		0	1.9813e-08			27.49	0.0491045	41.54	0.00192199
ENSMUSP00000100038	LLNKFLNKQAPQTVHLPSGETLDVFDAAER	K4(ICPL:13C(6)); K8(ICPL:13C(6))	3573.84	1.05618	-;-;1		0	6.33226e-09			32.6	0.019756	66.08	9.50658e-06
ENSMUSP00000100038	YTINIPEDLKPR	K10(ICPL:13C(6))	1569.83	1.12151	-;-;1		3.6e-05	0.000376804					26.77	0.0340812
ENSMUSP00000100038	DWAAKGPFLLGIKAVLAESYER	K5(ICPL); K13(ICPL)	2644.35				0	2.99786e-09					41.38	0.00225612
ENSMUSP00000100038	LLNKFLNKQAPQTVHLPSGETLDVFDAAER	K4(ICPL); K8(ICPL)	3561.81	1.01248	-;-;1		0	1.20448e-06					17.06	0.756652
ENSMUSP00000100000	KKGIEHHPNFR	K1(ICPL:13C(6)); K2(ICPL:13C(6))	1584.82	1.25218	-;1;1		9.8e-05	0.00227486			16.02	0.645089	14.02	0.996639
ENSMUSP00000100000	ILGVGISTGGR		1029.6				3.6e-05	0.000291145					32.52	0.00386233
ENSMUSP00000099990	IFGGLDR		777.426				0.005379	0.101294	17.59	0.161988	24.92	0.0299559
ENSMUSP00000099990	RIHLELR		936.574				0	0.000446017	34.99	0.000839935	30.11	0.00258372	34.77	0.00088358
ENSMUSP00000099990	SDYRETVFR		1172.57				0.000386	0.0111562	11.51	0.731039			12.23	0.619356
ENSMUSP00000099990	LDCLKSLDLFGCEVTNR	C3(Carbamidomethyl); K5(ICPL:13C(6)); C12(Carbamidomethyl)	2151.03	1.13215	1;1;1	9.83871	0	8.86111e-08	21.3	0.130841	16.95	0.350187	35.39	0.0051165
ENSMUSP00000099990	LLPQLSYLDGYDR		1552.8				0	1.81804e-06			39.34	0.00228169
ENSMUSP00000099990	LAEELPSLTHLNLSGNNLKDISTLEPLKR	K19(ICPL:13C(6)); K28(ICPL:13C(6))	3437.85	1.19558	-;1;-		0	1.49282e-07			20.56	0.160861	48.47	0.00026242
ENSMUSP00000099988	GHPVGLAEEEAVR		1363.7				0	2.30676e-06	23.48	0.0830179			44.43	0.000652647
ENSMUSP00000099988	QHADNIAHLEDAGER		1675.78				0.001322	0.0237117	10.05	1.03798
ENSMUSP00000099950	ASCLPVYR	C3(Carbamidomethyl)	965.486				0.000146	0.00135004	29.08	0.0132246	22.07	0.066433	19.43	0.120296
ENSMUSP00000099950	IEGIQNMPNVR		1270.66				9.3e-05	0.000787443	31.93	0.0103235	41.1	0.00116437	21.54	0.112934
ENSMUSP00000099950	IEGIQNMPNVR	M7(Oxidation)	1286.65				0.000386	0.011378	14.22	0.762562	29.09	0.0231207	34.7	0.00669217
ENSMUSP00000099950	AIDSLSIEKGYR	K9(ICPL)	1456.74	0.976166	1;-;-		0	0.000630164	27.54	0.0282797
ENSMUSP00000099950	AIDSLSIEKGYR	K9(ICPL:13C(6))	1462.76	0.799318	2;2;2	2.37635	0	6.84961e-06	29.6	0.019298	48.4	0.000256566	42.69	0.000955429
ENSMUSP00000099950	GAQVIENCAVTGIR	C8(Carbamidomethyl)	1487.76				0	3.48901e-08	60.4	1.80122e-05	85.01	6.23113e-08	82.9	9.8213e-08
ENSMUSP00000099950	LSFVGELGWELHVPR		1738.93				0	9.21995e-10	71.71	1.28498e-06	75.34	5.57051e-07	93.79	7.31203e-09
ENSMUSP00000099950	DPLHEELLGQGCVFQER	C12(Carbamidomethyl)	2026.96				0	0.000115465	15.52	0.499367	10.01	1.77092	22.2	0.112076
ENSMUSP00000099950	RDPLHEELLGQGCVFQER	C13(Carbamidomethyl)	2183.07				0	1.53736e-09	69.1	3.27251e-06	59.18	3.27921e-05	68.54	3.76489e-06
ENSMUSP00000099950	CQLMDSSEDLGMLSIQGPASR	C1(Carbamidomethyl)	2295.04				0	1.55577e-12	120.57	7.58606e-12	89.23	1.11041e-08	99.23	1.06862e-09
ENSMUSP00000099950	MAGVKVPLVAMHHAYVVTER	K5(ICPL)	2313.2	0.959939	3;-;-		0	2.73155e-09	42.68	0.00145938	20.03	0.264665	25.14	0.0812951
ENSMUSP00000099950	MAGVKVPLVAMHHAYVVTER	K5(ICPL:13C(6))	2319.22	0.80946	1;4;4	4.75501	0	2.08494e-09	39.95	0.00283242	41.49	0.00198682	41.69	0.00193467
ENSMUSP00000099950	MAGVKVPLVAMHHAYVVTER	M1(Oxidation); K5(ICPL)	2329.19	0.866563	1;-;-		0	6.40021e-07	25.71	0.0871394
ENSMUSP00000099950	DPSGGPVSLDFVKNGEYALER	K13(ICPL)	2355.12				0	0.000640823	28.21	0.0271059	10.47	1.57947
ENSMUSP00000099950	DPSGGPVSLDFVKNGEYALER	K13(ICPL:13C(6))	2361.15	0.858822	1;1;1	13.926	0	0.000168589	31.56	0.0144534	13.57	0.881281	27.57	0.0350844
ENSMUSP00000099950	MGVTYAAQVHLKSPFDPDNKR	K12(ICPL:13C(6)); K20(ICPL:13C(6))	2596.28	0.773712	-;2;2		0	8.84344e-08	19.76	0.311761	26.88	0.0614323	44.09	0.00115813
ENSMUSP00000099950	SHESYAKNYSVVFPHDEPLAGR	K7(ICPL)	2608.22	0.83068	1;1;1	7.19373	0	2.05985e-12	77.23	4.18208e-07	67.14	4.19237e-06	58.1	3.41514e-05
ENSMUSP00000099950	SHESYAKNYSVVFPHDEPLAGR	K7(ICPL:13C(6))	2614.24	0.929	2;4;2	14.3038	0	7.36283e-13	60.16	2.2409e-05	57.84	3.83139e-05	45.06	0.000718904
ENSMUSP00000099950	DILQDVLDADLSNEAFPFSTHQLVR		2843.43				0	1.17847e-08	88.27	5.44361e-08	72.73	1.96267e-06	91.36	2.86241e-08
ENSMUSP00000099950	ERSHESYAKNYSVVFPHDEPLAGR	K9(ICPL:13C(6))	2899.39	1.05618	1;1;-	17.7609	0	9.28524e-06	35.36	0.00951804	26.26	0.0742899
ENSMUSP00000099950	DLEEETGLHTGWIQNGGLFIASNQQR		2913.41				0	6.88546e-08	15.51	0.918086	22.85	0.182877	40.59	0.00284152
ENSMUSP00000099950	VAAVETEHGSIQTPCVVNCAGVWASKVGR	C15(Carbamidomethyl); C19(Carbamidomethyl); K26(ICPL)	3187.55				0	6.31756e-06	23.37	0.16201	12.24	2.06574	21.08	0.244867
ENSMUSP00000099950	VAAVETEHGSIQTPCVVNCAGVWASKVGR	C15(Carbamidomethyl); C19(Carbamidomethyl); K26(ICPL:13C(6))	3193.56	0.92422	2;3;3	9.07543	0	1.50432e-09	47.02	0.000720952	62.7	2.00313e-05	34.94	0.0121678
ENSMUSP00000099950	KAADWLFSADVNRPPGSTVYTCMLNQR	K1(ICPL); C22(Carbamidomethyl)	3202.52				0	2.24481e-06	33.95	0.0133702	28.52	0.0431657	36.22	0.00767681
ENSMUSP00000099950	VPVLEKTGIKSTVCGPESFTPDHKPLMGEAPELR	K6(ICPL); K10(ICPL); C14(Carbamidomethyl); K24(ICPL)	4034.98	0.919592	2;2;2	19.6981	0	7.02377e-11	48.42	0.000684868	34.9	0.0158723	68.63	6.70361e-06
ENSMUSP00000099950	VPVLEKTGIKSTVCGPESFTPDHKPLMGEAPELR	K6(ICPL:13C(6)); K10(ICPL:13C(6)); C14(Carbamidomethyl); K24(ICPL:13C(6))	4053.05				0	1.40916e-05	24.55	0.175551	27.06	0.104003	32.19	0.0317375
ENSMUSP00000099950	LAPGTQASPLVPAFEGDCYYLAVGGAVAQHNWSHINTVLQDQEFR	C18(Carbamidomethyl)	4927.4				0	6.15755e-06	32.9	0.0238224	23.47	0.209597	19.85	0.487552
ENSMUSP00000099950	MAGVKVPLVAMHHAYVVTER	M1(Oxidation); K5(ICPL:13C(6))	2335.21	1.10632	-;2;2		0	8.81449e-07			23.55	0.122536	33.27	0.0128106
ENSMUSP00000099950	MGVTYAAQVHLKSPFDPDNKR	K12(ICPL); K20(ICPL)	2584.24	0.583485	-;1;-		0	5.07323e-08			33.28	0.0105961	35.11	0.00699884
ENSMUSP00000099950	KAADWLFSADVNRPPGSTVYTCMLNQR	K1(ICPL:13C(6)); C22(Carbamidomethyl)	3208.54	0.877016	-;1;2		0	8.78057e-12			44.13	0.00126922	47.24	0.000625869
ENSMUSP00000099950	HWHADLRPDDSPLEAGLAFTCKLKTSVPFLGR	C21(Carbamidomethyl); K22(ICPL); K24(ICPL)	3844.91	0.746241	-;1;-		0	0.000110792			14.57	1.4821
ENSMUSP00000099950	HWHADLRPDDSPLEAGLAFTCKLKTSVPFLGR	C21(Carbamidomethyl); K22(ICPL:13C(6)); K24(ICPL:13C(6))	3856.94	0.754919	-;1;1		0	5.89016e-06			15.97	1.15083	27.95	0.0739096
ENSMUSP00000099950	VPVLEKTGIKSTVCGPESFTPDHKPLMGEAPELR	K6(ICPL:13C(6)); K10(ICPL:13C(6)); C14(Carbamidomethyl); K24(ICPL:13C(6)); M27(Oxidation)	4069.07	0.850036	-;1;-		0	8.6474e-08			25.93	0.125721	45.54	0.0013111
ENSMUSP00000099950	QGWERPGWFNPQETAQVLDYDYYGAYGNQAHKDYTYSR	K32(ICPL:13C(6))	4685.09	0.926233	-;1;-		0	2.13531e-09			46	0.000263748
ENSMUSP00000099950	VPVLEKTGIKSTVCGPESFTPDHKPLMGEAPELR	K6(ICPL); K10(ICPL); C14(Carbamidomethyl); K24(ICPL); M27(Oxidation)	4050.97				0	7.83231e-05					24.25	0.190925
ENSMUSP00000099938	KLSSAMSAAKAIADHIR	K1(ICPL); K10(ICPL)	1980.01	0.875485	3;1;2	8.93971	0	5.99449e-14	95.92	7.48386e-09	54.93	9.19107e-05	108.18	4.47041e-10
ENSMUSP00000099938	KLSSAMSAAKAIADHIR	K1(ICPL:13C(6)); K10(ICPL:13C(6))	1992.05	0.832073	1;2;2	3.10223	0	1.41876e-14	54.06	7.38172e-05	76.29	4.67577e-07	94.13	7.6887e-09
ENSMUSP00000099938	KLSSAMSAAKAIADHIR	K1(ICPL); M6(Oxidation); K10(ICPL)	1996				0	7.57032e-07	32.75	0.0138295
ENSMUSP00000099938	KLSSAMSAAKAIADHIR	K1(ICPL:13C(6)); M6(Oxidation); K10(ICPL:13C(6))	2008.05	0.845791	-;1;1		0	3.854e-09			38.05	0.00370537	20.84	0.194909
ENSMUSP00000099938	EKMDLTAKELTEEKETAFEFLSSA	K2(ICPL:13C(6)); K8(ICPL:13C(6)); K14(ICPL:13C(6))	3080.46	0.755826	-;-;2		6.7e-05	0.0010731					23.67	0.12521
ENSMUSP00000099918	IYGQACATYESASLR	C6(Carbamidomethyl)	1689.79				0	1.6763e-06	61.22	8.5703e-06	68.38	1.77158e-06	67.55	2.10072e-06
ENSMUSP00000099918	NHVAGQMLHGGGSKFNSGNR	K14(ICPL)	2173.01	0.856893	2;-;-		0	0.000424978	27.18	0.0336909
ENSMUSP00000099918	NHVAGQMLHGGGSKFNSGNR	K14(ICPL:13C(6))	2179.03	0.813927	-;1;2		0	1.77465e-07	24.33	0.0717661	34.28	0.00692379	44.12	0.000869393
ENSMUSP00000099918	NHVAGQMLHGGGSKFNSGNR	M7(Oxidation); K14(ICPL:13C(6))	2195.02				0.004349	0.0817733			10.05	1.5372
ENSMUSP00000099904	FIGMKSR	K5(ICPL)	943.481	1.08142	-;1;1		0.000272	0.00794287			29.7	0.0107688	33.72	0.00426743
ENSMUSP00000099904	MPEFYNR		956.429				0	0.000430019	45.64	9.55142e-05	47.15	6.74634e-05	39.38	0.000403709
ENSMUSP00000099904	EGAKYVSHGATGKGNDQVR	K4(ICPL); K13(ICPL)	2184.02	0.941403	2;1;2	30.4279	0	3.15592e-08	43.59	0.000658471	55.6	4.44808e-05	58.27	2.55425e-05
ENSMUSP00000099904	EGAKYVSHGATGKGNDQVR	K4(ICPL:13C(6)); K13(ICPL:13C(6))	2196.06	0.916057	4;5;3	26.5549	0	2.12535e-07	57.29	5.49649e-05	58.51	3.60778e-05	79.86	2.75747e-07
ENSMUSP00000099904	FELTCYSLAPQIKVIAPWR	C5(Carbamidomethyl); K13(ICPL)	2397.24				0	0.000240087	35.67	0.00777825			41.98	0.00183188
ENSMUSP00000099904	FELTCYSLAPQIKVIAPWR	C5(Carbamidomethyl); K13(ICPL:13C(6))	2403.26	1.03531	2;1;3	30.5083	0	3.93258e-06	56.56	6.30385e-05	45.45	0.000809689	61.71	1.91566e-05
ENSMUSP00000099904	TTSLELFMYLNEVAGKHGVGR	K16(ICPL)	2427.21	0.855426	1;-;-		0	1.45474e-11	70.62	2.25844e-06
ENSMUSP00000099904	TTSLELFMYLNEVAGKHGVGR	K16(ICPL:13C(6))	2433.23	1.08413	3;3;3	32.9508	0	5.50805e-07	48.22	0.000405277	69.39	3.06113e-06	55.08	8.25813e-05
ENSMUSP00000099904	GIYETPAGTILYHAHLDIEAFTMDR		2834.39				0	1.50003e-06	15.74	0.768055	22.05	0.168408	34.39	0.0105535
ENSMUSP00000099904	FIGMKSR	K5(ICPL:13C(6))	949.501	0.849516	-;-;1		0.000911	0.0235481			29.06	0.0168244	21.69	0.101985
ENSMUSP00000099904	KIKQGLGLKFAELVYTGFWHSPECEFVR	K1(ICPL); K3(ICPL); K9(ICPL); C24(Carbamidomethyl)	3654.81				6.7e-05	0.00107698					19.24	0.559884
ENSMUSP00000099878	IALKKQR	K4(ICPL); K5(ICPL)	1066.61	0.943597	1;1;1	8.23354	0.000304	0.00566402	27.45	0.01601	27.85	0.0132888	24.34	0.0323953
ENSMUSP00000099878	IALKKQR	K4(ICPL:13C(6)); K5(ICPL:13C(6))	1078.66				0.000724	0.0151196	20.76	0.0209865
ENSMUSP00000099878	RIALKKQR	K5(ICPL:13C(6)); K6(ICPL:13C(6))	1234.76	1.11212	2;1;-	19.2204	0	0.000759271	27.26	0.00197328	32.22	0.000629781
ENSMUSP00000099878	KPLNKEGKKPR	K1(ICPL:13C(6)); K8(ICPL:13C(6)); K9(ICPL:13C(6))	1627.92				5.1e-05	0.000951903	13.19	0.405375
ENSMUSP00000099878	KLFNLSKEDDVR	K1(ICPL); K7(ICPL)	1673.83	0.981801	2;1;3	2.66836	0	2.08248e-09	65.3	5.14986e-06	37.24	0.00312463	66.3	4.02035e-06
ENSMUSP00000099878	KLFNLSKEDDVR	K1(ICPL:13C(6)); K7(ICPL:13C(6))	1685.87	0.980021	4;4;3	1.43755	0	2.24838e-09	68.38	2.53393e-06	64.73	5.9226e-06	60.75	1.48086e-05
ENSMUSP00000099878	LLLSKGHSCYRPR	K5(ICPL); C9(Carbamidomethyl)	1691.88				0.000185	0.00198095	24.9	0.0603502
ENSMUSP00000099878	LLLSKGHSCYRPR	K5(ICPL:13C(6)); C9(Carbamidomethyl)	1697.9	1.12376	2;3;2	5.18036	0	0.000664026	30.91	0.0150028	20.46	0.155613	22.73	0.0946669
ENSMUSP00000099878	KPLNKEGKKPR	K1(ICPL); K5(ICPL); K8(ICPL); K9(ICPL)	1714.88	0.949892	1;2;1	12.0327	0	6.3562e-07	55.4	6.04205e-05	57.35	3.90244e-05	33.21	0.0105295
ENSMUSP00000099878	KPLNKEGKKPR	K1(ICPL:13C(6)); K5(ICPL:13C(6)); K8(ICPL:13C(6)); K9(ICPL:13C(6))	1738.96	0.985548	3;1;3	12.1527	0	1.12861e-07	65.16	4.08418e-06	60.45	1.22614e-05	57.41	2.26032e-05
ENSMUSP00000099878	MATEVAADALGEEWKGYVVR	K15(ICPL)	2300.1	1.10205	1;1;-	5.95502	0	4.07304e-07	55.98	5.05958e-05	70.34	1.82628e-06	45.46	0.000571737
ENSMUSP00000099878	MATEVAADALGEEWKGYVVR	K15(ICPL:13C(6))	2306.12	1.15848	3;2;2	12.5979	0	2.13576e-07	53.7	9.89664e-05	56.1	5.76857e-05	59.87	2.45232e-05
ENSMUSP00000099878	MKEAKEKRQEQIAKR	K2(ICPL:13C(6)); K5(ICPL:13C(6)); K7(ICPL:13C(6)); K14(ICPL:13C(6))	2317.21	1.6432	1;-;-		0	0.000734774	17.05	0.516775
ENSMUSP00000099878	ISGGNDKQGFPMKQGVLTHGR	K7(ICPL); K13(ICPL)	2437.18	0.987647	2;2;2	2.89743	0	3.19495e-09	43.06	0.00130498	55.73	7.0701e-05	46.47	0.000570323
ENSMUSP00000099878	ISGGNDKQGFPMKQGVLTHGR	K7(ICPL:13C(6)); K13(ICPL:13C(6))	2449.22	1.02499	2;2;1	4.81609	0	1.43911e-08	28.53	0.0390684	41.29	0.00209903	39.99	0.00279643
ENSMUSP00000099878	TKKNKEEAAEYAKLLAKR	K2(ICPL); K3(ICPL); K5(ICPL); K13(ICPL); K17(ICPL)	2616.3	0.909746	5;5;4	12.7143	0	7.55539e-11	49.07	0.000388982	50.15	0.000286434	60.08	3.10723e-05
ENSMUSP00000099878	TKKNKEEAAEYAKLLAKR	K2(ICPL:13C(6)); K3(ICPL:13C(6)); K5(ICPL:13C(6)); K13(ICPL:13C(6)); K17(ICPL:13C(6))	2646.4	0.823014	1;-;-		0	4.01255e-10	46.62	0.000591248	47.62	0.000433319	48.04	0.000423213
ENSMUSP00000099878	MKLNISFPATGCQKLIEVDDER	N-Term(ICPL); K2(ICPL); C12(Carbamidomethyl); K14(ICPL)	2879.35				0	7.71649e-07	28.35	0.0337032	42.67	0.00118425	23.46	0.0996305
ENSMUSP00000099878	ISGGNDKQGFPMKQGVLTHGR	K7(ICPL:13C(6)); M12(Oxidation); K13(ICPL:13C(6))	2465.21	0.728292	-;1;-		0	1.82981e-07			31.84	0.018428	39.75	0.00281232
ENSMUSP00000099878	RIALKKQR	K5(ICPL); K6(ICPL)	1222.72	1.02711	-;-;1		0.000829	0.0215142					19.69	0.0488665
ENSMUSP00000099878	MATEVAADALGEEWKGYVVR	M1(Oxidation); K15(ICPL:13C(6))	2322.12	1.11184	-;-;1		0	1.44039e-08					34.04	0.00994032
ENSMUSP00000099878	ISGGNDKQGFPMKQGVLTHGR	K7(ICPL); M12(Oxidation); K13(ICPL)	2453.18	0.601262	-;-;1		0	1.58041e-08					44.14	0.000876963
ENSMUSP00000099878	MKLNISFPATGCQKLIEVDDER	N-Term(ICPL:13C(6)); K2(ICPL:13C(6)); C12(Carbamidomethyl); K14(ICPL:13C(6))	2897.41				0	2.18904e-07					48.71	0.000405104
ENSMUSP00000099867;ENSMUSP00000018637;ENSMUSP00000007301;ENSMUSP00000018632;ENSMUSP00000019625;ENSMUSP00000129544	IEELEEELEAER		1488.71				0	7.74498e-06	55.35	3.45715e-05	72.63	6.71282e-07	63.47	5.53229e-06
ENSMUSP00000099867	SNAAAAALDKKQR	K10(ICPL); K11(ICPL)	1553.78				0	3.47947e-05	40.21	0.00148636	48.72	0.000209471	40.57	0.00137689
ENSMUSP00000099867	MVDSLQTSLDAETR		1565.74				0	1.32101e-06	45.15	0.000465875	60.17	1.4905e-05	47.41	0.000272327
ENSMUSP00000099867	VLSKANSEVAQWR	K4(ICPL)	1592.82				0	3.52828e-05	54.52	6.42793e-05	42.49	0.00104273	49.31	0.000220373
ENSMUSP00000099867	KLAEQELIETSER	K1(ICPL)	1650.83				0	9.88745e-09	82.81	1.1205e-07	60.22	2.00578e-05	85.87	5.46113e-08
ENSMUSP00000099867	LKKKDFELNALNAR	K2(ICPL); K3(ICPL); K4(ICPL)	1975.02				0	6.88425e-06	14.99	0.770205	24.59	0.0834087
ENSMUSP00000099867	KLAEKDEEMEQAKR	K1(ICPL); K5(ICPL); K13(ICPL)	2019.92				0	5.917e-08	24.87	0.0389375	27.15	0.0223593	29.07	0.0149275
ENSMUSP00000099867	QAEEAEEQANTNLSKFR	K15(ICPL)	2069.95				0	7.45512e-05	23.69	0.0487422			11.33	0.953388
ENSMUSP00000099867	IKELTYQTEEDRKNLLR	K2(ICPL); K13(ICPL)	2359.2				0	8.1897e-05	26.67	0.0595244	27.73	0.04891	20.91	0.230313
ENSMUSP00000099867	QLEEEVKAKNALAHALQSAR	K7(ICPL); K9(ICPL)	2416.24				0	0.000150828	18.56	0.409588
ENSMUSP00000099867	KVQHELDEAEERADIAESQVNKLR	K1(ICPL); K22(ICPL)	3017.47				0	8.62756e-07	27.3	0.0622868	39.29	0.00395087
ENSMUSP00000099867	LQDAEEAVEAVNAKCSSLEKTKHR	K14(ICPL); C15(Carbamidomethyl); K20(ICPL); K22(ICPL)	3028.42				0	6.06425e-10	26.18	0.0566328	30.84	0.018131	39.04	0.00267564
ENSMUSP00000099867	KQLEAEKLELQSALEEAEASLEHEEGKILR	K1(ICPL); K7(ICPL); K27(ICPL)	3735.85				0	1.19751e-07	44.86	0.00148924	29.71	0.0521699
ENSMUSP00000099867	NFDKILAEWKQKYEESQSELESSQKEAR	K4(ICPL); K10(ICPL); K12(ICPL); K25(ICPL)	3820.75				0	1.10074e-06	24.63	0.0650821
ENSMUSP00000099867	NNLLQAELEELR		1441.77				0	4.5313e-05			37.1	0.00369496
ENSMUSP00000099867	VRELENELEAEQKR	K13(ICPL)	1847.92				0	0.000451324			16.53	0.49024	15.21	0.659848
ENSMUSP00000099867	LQDLVDKLQLKVKAYKR	K7(ICPL); K11(ICPL); K13(ICPL); K16(ICPL)	2478.33				0	3.11156e-08			19.62	0.217742	29.65	0.0215701
ENSMUSP00000099867	VKKKMEGDLNEMEIQLSHANR	K2(ICPL); K3(ICPL); K4(ICPL)	2785.32				0	1.77143e-09			34.8	0.00783125	36.22	0.00569493
ENSMUSP00000099867	SLSTELFKLKNAYEESLEHLETFKR	K8(ICPL); K10(ICPL); K24(ICPL)	3327.64				0	1.26335e-06			17.86	0.680916
ENSMUSP00000099867	ILNPAAIPEGQFIDSR		1740.93				0.000247	0.00600532					11.16	1.58861
ENSMUSP00000099867	AQLEFNQIKAEIER	K9(ICPL)	1793.92				0	1.03873e-07					46.43	0.000616551
ENSMUSP00000099867	GKLTYTQQLEDLKR	K2(ICPL); K13(ICPL)	1902.97				0	6.67004e-05					14.61	0.939225
ENSMUSP00000099867	MAAEAQKQVKSLQSLLKDTQIQLDDAVR	K7(ICPL); K10(ICPL); K17(ICPL)	3442.74				3.6e-05	0.000536615					13.18	1.83921
ENSMUSP00000099867	ENKNLQEEISDLTEQLGSTGKSIHELEKIR	K3(ICPL); K21(ICPL); K28(ICPL)	3753.84				0	3.94543e-05					28.94	0.0580141
ENSMUSP00000099800	KLAEQFPR	K1(ICPL:13C(6))	1099.6	1.04419	1;2;1	4.13828	0.000262	0.0047311	15	0.311484	21.93	0.0666858	18.59	0.139048
ENSMUSP00000099788	FMTVLCTR	C6(Carbamidomethyl)	1027.51				0.000185	0.00280374	25.99	0.0215261	19.36	0.0990755	22.28	0.0505785
ENSMUSP00000099788	SELDMLDIR		1091.54				0	2.30948e-05	44.84	0.000457693	31.96	0.00881962	46.15	0.000338512
ENSMUSP00000099788	STPEYFAER		1099.51				0.000502	0.00910106	14.08	0.179787	22.38	0.0263034
ENSMUSP00000099788	QTFKSHFGR	K4(ICPL)	1212.59	0.63264	1;-;-		0.000262	0.00513182	17.97	0.24417
ENSMUSP00000099788	LFKAMKGLGTR	K3(ICPL:13C(6)); K6(ICPL:13C(6))	1443.8	1.02291	1;2;2	4.24569	0	7.28533e-06	42.04	0.000715823	49.61	0.000124164	44.21	0.000472247
ENSMUSP00000099788	DLMADLKSEISGDLAR	K7(ICPL)	1838.9	0.835297	-;-;1		0	1.64192e-09	23.07	0.0929633			62.57	1.04306e-05
ENSMUSP00000099788	DLMADLKSEISGDLAR	K7(ICPL:13C(6))	1844.92	0.732821	-;1;1		0	2.32952e-09	49.35	0.000228225	20.96	0.155926	86.91	4.08427e-08
ENSMUSP00000099788	TNEQMHQLVAAYKDAYER	K13(ICPL)	2272.04	0.919107	1;-;1	7.56781	0	2.12055e-08	37.03	0.00294257			42.11	0.000916614
ENSMUSP00000099788	TNEQMHQLVAAYKDAYER	K13(ICPL:13C(6))	2278.06	0.792785	-;1;-		0	3.85464e-09	24.37	0.0590436	18.16	0.236009	29.17	0.0187037
ENSMUSP00000099788	GELSGDFEKLMLAVVKCIR	K9(ICPL); K16(ICPL); C17(Carbamidomethyl)	2375.19	0.936725	1;-;1	14.8455	0	1.29953e-06	19.12	0.352077	17.15	0.56862	28.52	0.0412675
ENSMUSP00000099788	KAMKGIGTDEATIIDIVTHR	K1(ICPL); K4(ICPL)	2379.21	1.02413	1;1;1	22.5819	0	1.23434e-12	47.2	0.000538293	61.07	2.16902e-05	55.25	8.23966e-05
ENSMUSP00000099788	GELSGDFEKLMLAVVKCIR	K9(ICPL:13C(6)); K16(ICPL:13C(6)); C17(Carbamidomethyl)	2387.23	0.892023	-;1;1		0	8.21522e-09	18.19	0.530209	19.74	0.370001	36.04	0.00876078
ENSMUSP00000099788	LVFDEYLKTTGKPIEASIR	K8(ICPL); K12(ICPL)	2390.24				0	4.65249e-06	30.58	0.0265558	10.41	2.74794	31.14	0.0231893
ENSMUSP00000099788	KAMKGIGTDEATIIDIVTHR	K1(ICPL:13C(6)); K4(ICPL:13C(6))	2391.25	0.951212	1;1;1	13.9872	0	5.80115e-18	52.56	0.000137547	59.69	2.64738e-05	68.25	3.70318e-06
ENSMUSP00000099788	KAMKGIGTDEATIIDIVTHR	K1(ICPL); M3(Oxidation); K4(ICPL)	2395.21				0	3.38053e-05	16.76	0.668435
ENSMUSP00000099788	LVFDEYLKTTGKPIEASIR	K8(ICPL:13C(6)); K12(ICPL:13C(6))	2402.28	0.791885	1;1;-	25.6695	0	3.76473e-08	52.31	0.000154216	29.91	0.0267997	40.66	0.00215183
ENSMUSP00000099788	VELKGTVCAANDFNPDADAKALR	K4(ICPL:13C(6)); C8(Carbamidomethyl); K20(ICPL:13C(6))	2697.31	0.850198	1;-;1	0.520798	0	2.74807e-08	12.59	1.7378	23.26	0.150824	40.75	0.00272191
ENSMUSP00000099788	DLESDIIGDTSGHFQKMLVVLLQGTR	K16(ICPL)	2977.51	0.948233	1;-;-		0	0.000335425	12.02	2.28927	25.3	0.107572	16.64	0.766283
ENSMUSP00000099788	DLESDIIGDTSGHFQKMLVVLLQGTR	K16(ICPL:13C(6))	2983.53	0.827713	-;-;2		0	8.39218e-07	11.48	2.63149	19.09	0.441452	57.17	7.02233e-05
ENSMUSP00000099788	AINEAYKEDYHKSLEDALSSDTSGHFR	K7(ICPL); K12(ICPL)	3293.47	0.767302	1;1;2	10.3036	0	2.06383e-06	24.63	0.0380507	29.25	0.0128952	18.92	0.141698
ENSMUSP00000099788	AINEAYKEDYHKSLEDALSSDTSGHFR	K7(ICPL:13C(6)); K12(ICPL:13C(6))	3305.51	0.819793	1;-;-		0	6.59863e-06	30.84	0.0154938	17.15	0.38165	17.14	0.362244
ENSMUSP00000099788	ILISLATGNR		1057.64				0.00221	0.0369639			25.67	0.0139575	19.04	0.0642403
ENSMUSP00000099788	MAKIAQGAMYR	M1(Oxidation)	1255.63				0	3.60929e-05			36.89	0.00249666	36.65	0.00248713
ENSMUSP00000099788	VELKGTVCAANDFNPDADAKALR	K4(ICPL); C8(Carbamidomethyl); K20(ICPL)	2685.27	0.802488	-;1;-		0	1.38507e-07			29.63	0.0229764
ENSMUSP00000099788	LFKAMKGLGTR	K3(ICPL); K6(ICPL)	1431.76	0.788042	-;-;1		0	0.000235376					21.99	0.110356
ENSMUSP00000099757	QWYESHYALPLGR		1619.8				0	0.000664585	37.38	0.00314433	16.72	0.357527	22.44	0.0963578
ENSMUSP00000099757	IIDVVYNASNNELVR		1718.91				0	2.5844e-10	70.42	1.71578e-06	43.73	0.000800685	71.34	1.34783e-06
ENSMUSP00000099757	LDVGNFSWGSECCTR	C12(Carbamidomethyl); C13(Carbamidomethyl)	1787.75				0	7.41674e-10	46.12	4.64252e-05	47.24	2.73759e-05	83.18	8.89553e-09
ENSMUSP00000099757	SKKIQKKYDER	K2(ICPL); K3(ICPL); K6(ICPL); K7(ICPL)	1842.89	1.16032	3;1;-	20.8735	0	4.71054e-07	53.14	8.68666e-05	40.32	0.00162569	57.95	2.86981e-05
ENSMUSP00000099757	SKKIQKKYDER	K2(ICPL:13C(6)); K3(ICPL:13C(6)); K6(ICPL:13C(6)); K7(ICPL:13C(6))	1866.97	0.916354	1;1;-	21.1808	0	2.2672e-06	49.79	0.000225127	50.28	0.000210951	55.51	6.05965e-05
ENSMUSP00000099757	KYELGRPAANTKIGPR	K1(ICPL); K12(ICPL)	1981.04	0.982112	3;2;3	5.42675	0	2.8992e-06	32.4	0.0134941	40.71	0.00199133	45.87	0.000606936
ENSMUSP00000099757	KYELGRPAANTKIGPR	K1(ICPL:13C(6)); K12(ICPL:13C(6))	1993.08	1.03889	-;2;1		0	1.37807e-06	21.36	0.124659	37.56	0.00299037	36.46	0.00386364
ENSMUSP00000099757	TKTLVKNCIVLIDSTPYR	K2(ICPL); K6(ICPL); C8(Carbamidomethyl)	2331.22	1.32429	1;-;-		0	1.18133e-05	12.15	1.65184
ENSMUSP00000099757	TKTLVKNCIVLIDSTPYR	K2(ICPL:13C(6)); K6(ICPL:13C(6)); C8(Carbamidomethyl)	2343.26	1.4977	-;1;1		0	0.000144897	11.74	1.43355	14.8	0.768224	26.86	0.0464672
ENSMUSP00000099757	KKGAKLTPEEEEILNKKR	K1(ICPL); K2(ICPL); K5(ICPL); K16(ICPL); K17(ICPL)	2636.33	0.992382	3;3;2	12.2431	0	9.18615e-05	35.64	0.00785946	35.31	0.00868604	31.46	0.0225424
ENSMUSP00000099757	KKGAKLTPEEEEILNKKR	K1(ICPL:13C(6)); K2(ICPL:13C(6)); K5(ICPL:13C(6)); K16(ICPL:13C(6)); K17(ICPL:13C(6))	2666.43	0.873922	1;-;2	40.9314	0	9.28911e-10	18.16	0.286419	24.04	0.0660716	53.01	9.05063e-05
ENSMUSP00000099757	KKNAKISSLLEEQFQQGKLLACIASRPGQCGR	K1(ICPL); K2(ICPL); K5(ICPL); K18(ICPL); C22(Carbamidomethyl); C30(Carbamidomethyl)	4036.01	1.05658	-;-;1		0	1.71681e-08	34.25	0.0159919	47.31	0.000794211	62.36	2.46825e-05
ENSMUSP00000099757	KKNAKISSLLEEQFQQGKLLACIASRPGQCGR	K1(ICPL:13C(6)); K2(ICPL:13C(6)); K5(ICPL:13C(6)); K18(ICPL:13C(6)); C22(Carbamidomethyl); C30(Carbamidomethyl)	4060.09	0.991424	2;1;-	29.698	0	7.36347e-10	39.48	0.00521329	63.37	2.09187e-05	48.17	0.000702588
ENSMUSP00000099757	ADGYVLEGKELEFYLR	K9(ICPL:13C(6))	2013.01				0	8.02254e-08					68.83	3.05694e-06
ENSMUSP00000099730	KFAYLGR	K1(ICPL)	959.508	1.07648	1;-;-		0.001184	0.0201155	18.05	0.160592			15.21	0.304314
ENSMUSP00000099730	KKKQILR	K1(ICPL:13C(6)); K2(ICPL:13C(6)); K3(ICPL:13C(6))	1246.75	1.06882	1;2;2	2.30527	6.7e-05	0.00100821	17.31	0.0399428	20.51	0.0204516	23.93	0.00950753
ENSMUSP00000099730	GMLPHKTKR	K6(ICPL); K8(ICPL)	1277.66	1.18425	2;-;1	24.0065	0.00065	0.0130618	22.23	0.0939506			10.23	1.52695
ENSMUSP00000099730	GMLPHKTKR	K6(ICPL:13C(6)); K8(ICPL:13C(6))	1289.7	1.38007	1;1;1	13.2788	0.004349	0.0810497	11.21	1.13903	15.83	0.39313	11.18	1.21933
ENSMUSP00000099730	MVVPAALKVVR	K8(ICPL:13C(6))	1293.78	1.13193	1;-;2	2.23128	0	1.86689e-08	27.37	0.00549694			44.45	0.000105882
ENSMUSP00000099730	LAAIVAKQVLLGR	K7(ICPL:13C(6))	1462.92	1.09838	2;1;2	4.92699	0	1.30631e-07	39.02	0.000156643	63.74	5.07202e-07	55.79	3.1636e-06
ENSMUSP00000099730	NKLKYLAFLR	K2(ICPL); K4(ICPL)	1475.82	1.13286	-;1;1		0	5.01193e-06	14.11	0.436669	42.97	0.000605594	47.23	0.000212889
ENSMUSP00000099730	NKLKYLAFLR	K2(ICPL:13C(6)); K4(ICPL:13C(6))	1487.86	1.14864	1;-;1	21.8681	0	4.41185e-06	28.67	0.00930445	40.9	0.000715291	44.48	0.000254863
[truncated: 9,514 more rows]

## Sheet: S3_b
		All peptides identified and quantified after high confidence peptide filtering (1 Day, 0.1 Gy)
Protein Group Accessions	Sequence	Modifications	MH+ [Da]	Heavy/Light	Heavy/Light Count	Heavy/Light Variability [%]	q-Value	PEP	IonScore A2	Exp Value A2	IonScore B2	Exp Value B2	IonScore C2	Exp Value C2
ENSP00P02769	ALKAWSVAR	K3(ICPL)	1106.61	0.358022	5;3;2	13.8716	0	3.89846e-05	49.51	0.000112504	30.25	0.00986544	55.1	3.22936e-05
ENSP00P02769	ALKAWSVAR	K3(ICPL:13C(6))	1112.63	0.458007	-;3;1		0	0.000218665	39.8	0.000958123	43.47	0.000411549	52.06	5.56959e-05
ENSP00P02769	HPEYAVSVLLR		1283.71				0.000182	0.00178552	26.45	0.0228729	17.34	0.198339	27.55	0.017755
ENSP00P02769	CASIQKFGER	C1(Carbamidomethyl); K6(ICPL)	1300.61	0.725929	2;1;4	24.2478	0	9.73674e-06	50.38	6.82584e-05	38.82	0.000977589	49.37	8.61304e-05
ENSP00P02769	CASIQKFGER	C1(Carbamidomethyl); K6(ICPL:13C(6))	1306.63	0.70996	2;4;-	35.6385	0	1.31658e-05	51.25	8.5113e-05	31.57	0.00776739	43.22	0.000543131
ENSP00P02769	RHPEYAVSVLLR		1439.81				0	2.57674e-08	74.45	3.80457e-07	73.85	4.36823e-07	71.44	7.60862e-07
ENSP00P02769	KVPQVSTPTLVEVSR		1639.94				0	0.000120696	29.16	0.00970711			67.67	1.34236e-06
ENSP00P02769	MPCTEDYLSLILNR	C3(Carbamidomethyl)	1724.84				0	8.77248e-12	114.98	4.2729e-11	117.2	2.84866e-11	113.52	6.55831e-11
ENSP00P02769	MPCTEDYLSLILNR	M1(Oxidation); C3(Carbamidomethyl)	1740.83				0	2.21144e-07	85.19	4.82793e-08	86.13	4.49776e-08	89.47	1.80202e-08
ENSP00P02769	KVPQVSTPTLVEVSR	K1(ICPL)	1744.96	0.579013	4;-;5	12.0237	0	2.82801e-09	67.69	2.73196e-06	55.61	4.57524e-05	68.42	2.23014e-06
ENSP00P02769	KVPQVSTPTLVEVSR	K1(ICPL:13C(6))	1750.98	0.629918	1;6;1	17.2902	0	6.18431e-08	60.85	1.00725e-05	60.11	1.19436e-05	67.14	2.36666e-06
ENSP00P02769	ETYGDMADCCEKQEPER	C9(Carbamidomethyl); C10(Carbamidomethyl); K12(ICPL)	2222.84	0.583662	4;-;2	16.5566	0	4.43028e-08	75.75	2.65442e-08	70.87	8.16526e-08	60.99	7.94273e-07
ENSP00P02769	ETYGDMADCCEKQEPER	C9(Carbamidomethyl); C10(Carbamidomethyl); K12(ICPL:13C(6))	2228.86	0.647547	1;6;4	19.9352	0	1.17004e-11	67.22	1.89221e-07	92.89	5.12826e-10	87.68	1.70204e-09
ENSP00P02769	CCTKPESERMPCTEDYLSLILNR	C1(Carbamidomethyl); C2(Carbamidomethyl); K4(ICPL:13C(6)); M10(Oxidation); C12(Carbamidomethyl)	2999.35	1.11278	1;-;-		0	3.35038e-05	22.71	0.0562586
ENSP00P02769	LCVLHEKTPVSEKVTKCCTESLVNR	C2(Carbamidomethyl); K7(ICPL); K13(ICPL); K16(ICPL); C17(Carbamidomethyl); C18(Carbamidomethyl)	3302.58	0.676637	6;3;8	22.3404	0	9.79532e-10	60.96	2.44512e-05	59.22	3.50645e-05	56.63	6.4312e-05
ENSP00P02769	LCVLHEKTPVSEKVTKCCTESLVNR	C2(Carbamidomethyl); K7(ICPL:13C(6)); K13(ICPL:13C(6)); K16(ICPL:13C(6)); C17(Carbamidomethyl); C18(Carbamidomethyl)	3320.64	0.682096	3;7;2	20.5396	0	8.03871e-09	66.59	9.27556e-06	60	4.12e-05	58.5	5.91853e-05
ENSP00P02769	ETYGDMADCCEKQEPER	M6(Oxidation); C9(Carbamidomethyl); C10(Carbamidomethyl); K12(ICPL:13C(6))	2244.86	0.814734	-;1;1		0	8.09306e-08			27.4	0.00181539	44.3	3.70655e-05
ENSP00P02769	ETYGDMADCCEKQEPER	M6(Oxidation); C9(Carbamidomethyl); C10(Carbamidomethyl); K12(ICPL)	2238.84	0.754809	-;-;1		0	1.06202e-05					42.69	5.36995e-05
ENSP00P01012	KIKVYLPR	K1(ICPL); K3(ICPL)	1226.7	0.136778	4;3;2	19.7511	0	1.1411e-06	38.38	0.00113991	37.24	0.00148207	46.78	0.000164767
ENSP00P01012	KIKVYLPR	K1(ICPL:13C(6)); K3(ICPL:13C(6))	1238.74	0.136533	2;3;4	19.2162	0	0.000115965	32.82	0.00143659	46.82	5.71917e-05	47.05	7.49521e-05
ENSP00P01012	GGLEPINFQTAADQAR		1687.84				0	1.68984e-08	91.06	1.74705e-08	96.66	4.81177e-09	89.84	2.3085e-08
ENSP00P01012	ELINSWVESQTNGIIR		1858.97				0	2.49006e-10	104.13	1.02387e-09	77.81	4.37951e-07	79.98	2.46633e-07
ENSP00P01012	EVVGSAEAGVDAASVSEEFR		2008.94				0	6.25961e-13	120.67	1.73122e-11	132.82	1.04218e-12	127.14	3.89292e-12
ENSP00P01012	YPILPEYLQCVKELYR	C10(Carbamidomethyl); K12(ICPL)	2189.11	0.148305	5;4;4	23.2002	0	3.79844e-07	72.14	1.77784e-06	64.79	1.00066e-05	64.2	1.11015e-05
ENSP00P01012	YPILPEYLQCVKELYR	C10(Carbamidomethyl); K12(ICPL:13C(6))	2195.13	0.144961	1;2;2	17.0581	0	1.02301e-07	54.2	0.000101511	76.88	5.51763e-07	65.03	8.33805e-06
ENSP00P01012	DILNQITKPNDVYSFSLASR	K8(ICPL)	2386.2	0.147252	2;4;5	19.3432	0	1.65916e-08	63	1.51609e-05	71.33	2.16445e-06	71.48	2.20476e-06
ENSP00P01012	VTEQESKPVQMMYQIGLFR	K7(ICPL)	2389.17	0.129704	4;5;6	21.0672	0	3.83151e-10	91.01	1.9654e-08	77.01	5.00654e-07	66.96	5.0041e-06
ENSP00P01012	DILNQITKPNDVYSFSLASR	K8(ICPL:13C(6))	2392.22	0.134074	3;2;1	16.8297	0	6.82803e-10	86.84	5.65149e-08	87.43	4.81612e-08	86.74	5.82549e-08
ENSP00P01012	VTEQESKPVQMMYQIGLFR	K7(ICPL:13C(6))	2395.19	0.155684	-;1;-		0	4.02056e-09	64.24	1.12634e-05	77.02	5.68023e-07	66.46	6.75571e-06
ENSP00P01012	VTEQESKPVQMMYQIGLFR	K7(ICPL); M11(Oxidation)	2405.16	0.128392	4;3;3	24.3221	0	9.62251e-06	58.12	3.93904e-05	70.66	2.10888e-06	86.38	5.91471e-08
ENSP00P01012	VTEQESKPVQMMYQIGLFR	K7(ICPL); M11(Oxidation); M12(Oxidation)	2421.16	0.141966	1;2;1	23.305	0	6.29042e-06	22.93	0.124022	23.6	0.108474	49.34	0.000282883
ENSP00P01012	ADHPFLFCIKHIATNAVLFFGR	C8(Carbamidomethyl); K10(ICPL)	2679.37	0.1588	3;2;2	32.1464	0	1.83169e-09	39.62	0.00354718	19.61	0.360459	88.9	4.27055e-08
ENSP00P01012	FDKLPGFGDSIEAQCGTSVNVHSSLR	K3(ICPL); C15(Carbamidomethyl)	2926.38	0.132356	-;1;1		0	1.18022e-06	47.16	0.000430773	21.77	0.148023	37.66	0.00376214
ENSP00P01012	LYAEERYPILPEYLQCVKELYR	C16(Carbamidomethyl); K18(ICPL)	2950.48	0.1537	5;3;4	26.5685	0	2.63917e-09	60.03	3.74405e-05	55.13	0.000114628	54.23	0.000139324
ENSP00P01012	LYAEERYPILPEYLQCVKELYR	C16(Carbamidomethyl); K18(ICPL:13C(6))	2956.5	0.176254	-;1;-		0	2.30723e-10	44.35	0.00120101	57.37	5.90005e-05
ENSP00P01012	TQINKVVR	K5(ICPL)	1062.6	0.113855	-;4;2		0	9.63632e-05			44.59	0.000312783	48.31	0.000132814
ENSP00P01012	TQINKVVR	K5(ICPL:13C(6))	1068.62	0.183344	-;1;-		5.3e-05	0.000392418			42.8	0.000482823
ENSP00P01012	VTEQESKPVQMMYQIGLFR	K7(ICPL:13C(6)); M12(Oxidation)	2411.18	0.177981	-;1;-		0	2.33247e-06			65.03	7.64714e-06
ENSP00P01012	ADHPFLFCIKHIATNAVLFFGR	C8(Carbamidomethyl); K10(ICPL:13C(6))	2685.39	0.203991	-;1;-		5.3e-05	0.000431705			12.6	1.62115
ENSP00P01012	KIKVYLPR	K3(ICPL)	1121.68				0.000306	0.00196269					34.81	0.00113977
ENSP00P00921	LVQFHFHWGSSDDQGSEHTVDR		2584.16				0	1.43699e-09	72.42	6.043e-07	75.92	2.76327e-07	89.88	1.11026e-08
ENSP00P00921	TLNFNAEGEPELLMLANWRPAQPLKNR	K25(ICPL)	3227.64				0.000128	0.000500063	12.92	2.0701
ENSP00P00921	TLNFNAEGEPELLMLANWRPAQPLKNR	K25(ICPL:13C(6))	3233.66	1.20931	6;6;6	20.4834	0	1.7337e-07	82.56	2.06321e-07	98.79	4.9945e-09	85.99	9.47905e-08
ENSP00P00921	TLNFNAEGEPELLMLANWRPAQPLKNR	M14(Oxidation); K25(ICPL:13C(6))	3249.66	1.37928	2;7;6	18.4304	0	4.47867e-10	84.62	1.208e-07	101.32	2.59004e-09	78.88	4.51027e-07
ENSP00P00921	MSHHWGYGKHNGPEHWHKDFPIANGER	M1(Oxidation); K18(ICPL)	3345.49				0	3.2094e-08	30.04	0.01189	44.03	0.00047444	43.79	0.000534823
ENSP00P00921	QSPVDIDTKAVVQDPALKPLALVYGEATSR	K9(ICPL); K18(ICPL)	3391.76	1.08594	1;-;1	20.9109	0	6.15986e-10	56.87	7.73015e-05	50.52	0.000337563	75	1.1906e-06
ENSP00P00921	QSPVDIDTKAVVQDPALKPLALVYGEATSR	K9(ICPL:13C(6)); K18(ICPL:13C(6))	3403.8	1.26876	4;3;2	26.2706	0	3.65134e-13	78.87	3.37267e-07	91.23	1.95119e-08	74.78	8.59925e-07
ENSP00P00921	MSHHWGYGKHNGPEHWHKDFPIANGER	M1(Oxidation); K9(ICPL); K18(ICPL)	3450.51				0	7.81128e-07	36.36	0.00172249	22.37	0.036504	24.95	0.0262309
ENSP00P00921	MVNNGHSFNVEYDDSQDKAVLKDGPLTGTYR	K18(ICPL); K22(ICPL)	3680.67	1.14815	5;-;5	10.9685	0	3.02686e-09	77.62	3.37314e-07	50	0.0001855	51.03	0.000136867
ENSP00P00921	MVNNGHSFNVEYDDSQDKAVLKDGPLTGTYR	K18(ICPL:13C(6)); K22(ICPL:13C(6))	3692.71	1.31659	3;11;4	25.1807	0	4.18349e-06	75.01	8.67626e-07	75.81	7.53151e-07	76.39	6.36033e-07
ENSP00P00921	MVNNGHSFNVEYDDSQDKAVLKDGPLTGTYR	M1(Oxidation); K18(ICPL); K22(ICPL)	3696.66	1.35517	2;1;1	18.8679	0	1.72e-08	62.22	6.77764e-06	23.53	0.0561165	56.05	3.10392e-05
ENSP00P00921	MVNNGHSFNVEYDDSQDKAVLKDGPLTGTYR	M1(Oxidation); K18(ICPL:13C(6)); K22(ICPL:13C(6))	3708.71	1.5958	-;4;3		0	6.38953e-07	50.78	0.000219764	52.27	0.000154754	66.88	5.292e-06
ENSP00P00921	RMVNNGHSFNVEYDDSQDKAVLKDGPLTGTYR	K19(ICPL); K23(ICPL)	3836.77	1.48033	-;1;1		0	3.65839e-10	67.02	4.95531e-06	45.75	0.000618619	85.36	7.17492e-08
ENSP00P00921	RMVNNGHSFNVEYDDSQDKAVLKDGPLTGTYR	K19(ICPL:13C(6)); K23(ICPL:13C(6))	3848.8	1.36737	3;4;3	27.9016	0	3.57261e-11	108.47	3.75495e-10	60.99	2.53179e-05	73.43	1.43899e-06
ENSP00P00921	RMVNNGHSFNVEYDDSQDKAVLKDGPLTGTYR	M2(Oxidation); K19(ICPL); K23(ICPL)	3852.78				0	2.89175e-05	25.54	0.0593416
ENSP00P00921	RMVNNGHSFNVEYDDSQDKAVLKDGPLTGTYR	M2(Oxidation); K19(ICPL:13C(6)); K23(ICPL:13C(6))	3864.81	1.25243	2;-;1	11.3644	0	1.62914e-08	45.4	0.000806087	71.97	1.96e-06	36	0.00730959
ENSP00P00921	QSPVDIDTKAVVQDPALKPLALVYGEATSR	K9(ICPL:13C(6)); K18(ICPL)	3397.74				0.001093	0.0236616			18.38	0.540912
ENSMUSP00000137617	LEQHSQQPQLSPATSGR		1863.93				0	6.26144e-05					29.39	0.0255478
ENSMUSP00000137585	VGIEHLLR		936.562				0	9.99962e-05	40.42	0.000240572	29.03	0.00325067	30.39	0.0024224
ENSMUSP00000137585	DSFQEVLR		993.499				0.000182	0.00137898	26.21	0.0286001
ENSMUSP00000137585	LMHLEFGR		1002.52				4.9e-05	0.000163906	35.38	0.00509932			17.18	0.329252
ENSMUSP00000137585	VALVQYSDR		1050.56				5.3e-05	0.000152381	28.86	0.0124816	38.22	0.00140868
ENSMUSP00000137585	LNIGPSKVR	K7(ICPL:13C(6))	1094.64	0.731826	1;-;-		0.000941	0.0196431	17.63	0.307199
ENSMUSP00000137585	GFMYDRPLR		1154.58				0.001276	0.030763	10.69	0.861631			14.02	0.390334
ENSMUSP00000137585	NAGPEFQYIR		1194.59				0.001461	0.0365539	32.86	0.00556427
ENSMUSP00000137585	ELGTIQQVISER		1372.74				0	0.000257146	40.37	0.00130403	36.51	0.0031605	50.99	0.000112657
ENSMUSP00000137585	SSDAVAGPASSLKQR	K13(ICPL:13C(6))	1584.81				0	1.62878e-08	41.23	0.00167245			62.72	1.21079e-05
ENSMUSP00000137585	VAVVTYNNEVTTEIR		1707.89				0	7.03321e-09	80.87	1.8129e-07
ENSMUSP00000137585	LTLLGGPTPNTGAALEFVLR		2040.15				0	1.11607e-07	64.42	3.59603e-06	73.46	4.48563e-07	79.92	1.01859e-07
ENSMUSP00000137585	TRPEFYLNSHMDQQGVISAIR		2462.22				0	1.91143e-10	50.74	0.000223484			49.05	0.000337886
ENSMUSP00000137585	IEDGVPQHLVLFLGGKSQDDVAR	K16(ICPL)	2598.34				0	1.84313e-05	23.26	0.139967
ENSMUSP00000137585	IEDGVPQHLVLFLGGKSQDDVAR	K16(ICPL:13C(6))	2604.35	0.726126	1;1;-	34.5216	0	8.55298e-11	54.19	0.000118702	11.15	2.43254
ENSMUSP00000137585	SQRPYVLTADTLKLYQNKFR	K13(ICPL); K18(ICPL)	2651.38	0.854224	1;-;-		0	1.76566e-05	30.19	0.0280936
ENSMUSP00000137585	SQRPYVLTADTLKLYQNKFR	K13(ICPL:13C(6)); K18(ICPL:13C(6))	2663.41	0.781815	-;-;1		0	7.28929e-05	19.61	0.3167			12.84	1.23239
ENSMUSP00000137585	VSVMANTPSGPVEAFDFAEYQPELFEKFR	K27(ICPL:13C(6))	3416.62	0.692514	-;-;1		0.000216	0.000999939	15	0.841166			18.54	0.40728
ENSMUSP00000137585	AAEGVPKLLVLITGGKSLDEVSQPAQELKR	K7(ICPL:13C(6)); K16(ICPL:13C(6)); K29(ICPL:13C(6))	3479.91				0	5.88059e-06	26.04	0.0409417
ENSMUSP00000137585	IEEGVPQFLVLISSGKSDDEVDDSAVELKQFGVAPLTIAR	K16(ICPL:13C(6)); K29(ICPL:13C(6))	4494.33				0.000182	0.00212708	11.69	2.85965
ENSMUSP00000137585	VAIAQFSDDVR		1220.63				5.3e-05	0.000433635			43.59	0.000739412	43.81	0.000702889
ENSMUSP00000137585	FASEIVDTVYEDGDSIR		1915.89				0	2.09176e-07			57.18	2.23011e-05	66.16	2.66313e-06
ENSMUSP00000137585	VGLVQYNSDPTDEFFLR		1999.98				0	1.51999e-08			85.33	5.55404e-08	22.4	0.109046
ENSMUSP00000137585	YPPSVVESDAADIVFLIDSSDAVKPDGIAHIR	K24(ICPL:13C(6))	3507.76				0	1.77867e-10			49.32	0.000553758
ENSMUSP00000137585	ALEFVAR		805.456				0.000395	0.00274941					39.95	0.000708106
ENSMUSP00000137585	RLNIGPSKVR	K8(ICPL)	1244.72	0.647585	-;-;1		0.000726	0.00764308					27.63	0.0143245
ENSMUSP00000137585	RLNIGPSKVR	K8(ICPL:13C(6))	1250.74				0.001137	0.0125205					19.76	0.125233
ENSMUSP00000137585	TDLQTITNDPR		1273.64				0.001641	0.0216118					14.66	0.543747
ENSMUSP00000137585	IVEYLDIGFDTTR		1541.78				0	0.000103671					21.43	0.116551
ENSMUSP00000137585	HAQVISSSGIVSLGIGDR		1795.97				0	2.77196e-10					71.27	1.50783e-06
ENSMUSP00000137585	IEDNVQQFLVLLVAGR		1814.02				0	1.30094e-09					91.01	8.55901e-09
ENSMUSP00000137538	LLCSISQER	C3(Carbamidomethyl)	1105.57				0	4.71934e-05	38.14	0.00257048	45.65	0.000469666	49.48	0.000174152
ENSMUSP00000137459	NDFQLIGIQDGYLSLLQDSGEVR		2580.29				0	2.58118e-12	113.43	1.65462e-10	97.3	6.63834e-09	113.19	1.67907e-10
ENSMUSP00000137459	NDFQLIGIQDGYLSLLQDSGEVREDLR		3093.56				0	3.80948e-05	36.54	0.00919442	28.47	0.0593111	40.83	0.00338676
ENSMUSP00000137435	QELSHALYQHDAACR	C14(Carbamidomethyl)	1798.83				0	1.28681e-05	37.41	0.00242371			22.03	0.083653
ENSMUSP00000137309	LVTTGVLKQTKGVGASGSFR	K8(ICPL); K11(ICPL)	2216.18	0.967135	1;-;2	7.92907	0	1.9433e-12	90.28	2.12827e-08	18.22	0.295295	63.54	9.58204e-06
ENSMUSP00000137309	LVTTGVLKQTKGVGASGSFR	K8(ICPL:13C(6)); K11(ICPL:13C(6))	2228.22	0.982838	4;1;1	17.552	0	3.21956e-13	99.1	1.80234e-09	107.12	2.73665e-10	124.19	5.46829e-12
ENSMUSP00000137309	AKASKKSTDHPKYSDMIVAAIQAEKNR	K2(ICPL); K5(ICPL); K6(ICPL); K12(ICPL); K25(ICPL)	3512.69	0.922128	4;2;4	12.9528	0	1.58858e-08	57.44	5.62542e-05	47.41	0.000577334	59.49	3.59311e-05
ENSMUSP00000137309	AKASKKSTDHPKYSDMIVAAIQAEKNR	K2(ICPL); K5(ICPL); K6(ICPL); K12(ICPL); M16(Oxidation); K25(ICPL)	3528.7				0	0.000149949	16.74	0.848404
ENSMUSP00000137309	AKASKKSTDHPKYSDMIVAAIQAEKNR	K2(ICPL:13C(6)); K5(ICPL:13C(6)); K6(ICPL:13C(6)); K12(ICPL:13C(6)); K25(ICPL:13C(6))	3542.78	0.8221	-;2;-		0	6.46636e-10	47.72	0.000674486	59.54	4.40802e-05	21.49	0.284541
ENSMUSP00000137309	TENSTSAPAAKPKR	N-Term(ICPL); K11(ICPL); K13(ICPL)	1772.83				0.000153	0.0018489			32.81	0.00712097
ENSMUSP00000137309	TENSTSAPAAKPKR	N-Term(ICPL:13C(6)); K11(ICPL:13C(6)); K13(ICPL:13C(6))	1790.89				5.3e-05	7.0123e-05			31.6	0.0131448
ENSMUSP00000137309	QSIQKYIKSHYKVGENADSQIKLSIKR	K5(ICPL); K8(ICPL); K12(ICPL); K22(ICPL:13C(6)); K26(ICPL:13C(6))	3698.9				0	3.55158e-05			16.29	0.941028	29.17	0.0440052
ENSMUSP00000136535	GILESTKAR	K7(ICPL:13C(6))	1085.6	0.990927	-;1;-		0.000128	0.000721864	24.34	0.054299	13.79	0.6163	13.12	0.719105
ENSMUSP00000136535	LHALVVGPGLGRDDLLLNNVR		2241.28				0	5.63586e-05	19.61	0.0541508	12.87	0.26079	20.67	0.0419949
ENSMUSP00000136535	LHALVVGPGLGR		1188.72				5.3e-05	8.73055e-05			29.69	0.00327567	26.78	0.00325336
ENSMUSP00000136527	IMLKNVEDFTGPR	K4(ICPL:13C(6))	1630.83	1.20627	1;-;-		0	2.14865e-05	29.09	0.0285464	27.04	0.0470519
ENSMUSP00000136505	EEQDFVVKHR	K8(ICPL)	1391.67				0.000323	0.00601501			20.92	0.103564
ENSMUSP00000136505	EEQDFVVKHR	K8(ICPL:13C(6))	1397.69	1.50634	-;1;1		5.3e-05	0.000111908			42.12	0.000856198	35.62	0.00385191
ENSMUSP00000136029	GAGLLQRPGTEPGHSAGSSGSR		2079.03				0	1.67064e-06	36.63	0.00549693	26.46	0.0593102	28.07	0.0396906
ENSMUSP00000135739	VHCCPHGASCDLVHTR	C3(Carbamidomethyl); C4(Carbamidomethyl); C10(Carbamidomethyl)	1905.82				0	9.39415e-07			29.08	0.00339886
ENSMUSP00000135727	EEPRPVPQGSCQSELHR	C11(Carbamidomethyl)	2005.95				0	3.49175e-07			30.41	0.0143766	29.05	0.0194144
ENSMUSP00000135492	ELAGHTGYLSCCR	C11(Carbamidomethyl); C12(Carbamidomethyl)	1523.67				0	1.20363e-05	40.63	0.000428159	13.16	0.265682	55.66	1.43971e-05
ENSMUSP00000135466	THPELLVAHAYTR		1507.8				0	3.88155e-08	41.4	0.00128587	64.85	5.48296e-06	47.42	0.000300682
ENSMUSP00000135466	NKQNPVYAPLYFPEELHR	K2(ICPL:13C(6))	2326.17	1.54871	-;-;1		0	6.35257e-06					24.4	0.108923
ENSMUSP00000135427;ENSMUSP00000073561;ENSMUSP00000097294;ENSMUSP00000077290;ENSMUSP00000100047;ENSMUSP00000106085;ENSMUSP00000088287;ENSMUSP00000076397	LAHYNKR	K6(ICPL:13C(6))	1012.54				5.3e-05	0.0013044			52.57	6.36353e-05
ENSMUSP00000135427;ENSMUSP00000073561;ENSMUSP00000097294;ENSMUSP00000077290;ENSMUSP00000100047;ENSMUSP00000106085	STITSREIQTAVR		1461.8				0.00017	0.00077897	18.5	0.216825	25.81	0.0402818	34.82	0.00505951
ENSMUSP00000135427;ENSMUSP00000073561;ENSMUSP00000097294;ENSMUSP00000077290;ENSMUSP00000100047;ENSMUSP00000076397	LLLPGELAKHAVSEGTKAVTKYTSSK	K9(ICPL); K17(ICPL); K21(ICPL); K26(ICPL)	3148.61				0	7.27941e-07	41.61	0.00264362	42.24	0.00230157	43.58	0.00186156
ENSMUSP00000135427;ENSMUSP00000073561;ENSMUSP00000097294;ENSMUSP00000077290;ENSMUSP00000100047;ENSMUSP00000076397	LLLPGELAKHAVSEGTKAVTKYTSSK	K9(ICPL:13C(6)); K17(ICPL:13C(6)); K21(ICPL:13C(6)); K26(ICPL:13C(6))	3172.69				0	1.99783e-05	17.96	0.403888	30.27	0.0256544	35.85	0.00683842
ENSMUSP00000135427	PDPAKSAPAPKKGSKKAVTKVQKKDGKKR	K5(ICPL:13C(6)); K11(ICPL:13C(6)); K12(ICPL:13C(6)); K15(ICPL:13C(6)); K16(ICPL:13C(6)); K20(ICPL:13C(6)); K23(ICPL:13C(6)); K24(ICPL:13C(6)); K27(ICPL:13C(6)); K28(ICPL:13C(6))	4184.24				0	0.000106935	21.05	0.197487
ENSMUSP00000135427	PDPAKSAPAPKKGSKKAVTKVQKKDGKKR	N-Term(ICPL); K5(ICPL); K11(ICPL); K12(ICPL); K15(ICPL); K16(ICPL); K20(ICPL); K23(ICPL); K24(ICPL); K27(ICPL); K28(ICPL)	4229.07				0	1.98988e-05	29.08	0.0616738	23.72	0.214008	30.18	0.0478261
ENSMUSP00000135427	PDPAKSAPAPKKGSKKAVTKVQKKDGKKR	N-Term(ICPL); K5(ICPL); K11(ICPL:13C(6)); K12(ICPL:13C(6)); K15(ICPL:13C(6)); K16(ICPL:13C(6)); K20(ICPL:13C(6)); K23(ICPL:13C(6)); K24(ICPL:13C(6)); K27(ICPL:13C(6)); K28(ICPL:13C(6))	4283.26				0	3.56514e-05	26.17	0.0653382	22.61	0.154066	24.99	0.103328
ENSMUSP00000135427	PDPAKSAPAPKKGSKKAVTKVQKKDGKKR	N-Term(ICPL:13C(6)); K5(ICPL:13C(6)); K11(ICPL:13C(6)); K12(ICPL:13C(6)); K15(ICPL:13C(6)); K16(ICPL:13C(6)); K20(ICPL:13C(6)); K23(ICPL:13C(6)); K24(ICPL:13C(6)); K27(ICPL:13C(6)); K28(ICPL:13C(6))	4295.29				0	4.57327e-09	45.4	0.000657559	55.59	7.71582e-05
ENSMUSP00000135427	PDPAKSAPAPKKGSKKAVTKVQKKDGKKR	N-Term(ICPL); K11(ICPL); K12(ICPL); K15(ICPL); K16(ICPL); K20(ICPL); K23(ICPL); K24(ICPL); K27(ICPL); K28(ICPL)	4124.06				0	5.47552e-05					14.91	1.73047
ENSMUSP00000135319	KIHVIR	K1(ICPL)	870.53	0.946624	-;1;1		0.000571	0.0120377	22.92	0.0301198	27.78	0.00983676	29.42	0.00674298
ENSMUSP00000135319	KIHVIR	K1(ICPL:13C(6))	876.55	1.14107	1;-;2	5.39662	0.000911	0.0187046	24.94	0.00448878	26.98	0.00280626	28.79	0.00184981
ENSMUSP00000135319	AVENELLDR		1058.55				0.000182	0.00527005	36.27	0.00285618			23.08	0.0585527
ENSMUSP00000135319	LFMDDQEVAVVYFR		1731.84				8.9e-05	0.000450347	32.07	0.0115792
ENSMUSP00000135319	ASYILMEKIEPEPFR	K8(ICPL:13C(6))	1933.98	0.975715	1;-;-		0	8.01373e-09	57.07	5.9588e-05
ENSMUSP00000135319	DGYMPSQYNSQNWEAR		1945.81				0	5.05576e-07	48.52	2.67149e-05	36.9	0.000479808	50.16	1.73489e-05
ENSMUSP00000135319	AAKCPDIAIQLAGTKKVQQELSR	K3(ICPL:13C(6)); C4(Carbamidomethyl); K15(ICPL:13C(6)); K16(ICPL:13C(6))	2858.51				0	1.62062e-08	46.03	0.000695992
ENSMUSP00000135319	ATFAGLYSLDMGEEGDQAIAEALAAPSHFVLKPQR	K32(ICPL:13C(6))	3814.89	0.989636	2;2;-	2.28776	0	4.35245e-15	83.73	1.83014e-07	47.97	0.000680642
ENSMUSP00000135319	VGLLEALLPGQPEAVAR		1733				0.000559	0.00582581					15.8	0.251191
ENSMUSP00000135319	EGGGNNLYGEEMVQALEQLKDSEER	K20(ICPL)	2900.3	0.950923	-;-;1		0	3.21057e-05					11.25	0.806136
ENSMUSP00000135244	MALKQISSNR	M1(Oxidation)	1163.62				0.00446	0.0803307	28.3	0.0191545			25.31	0.0422525
ENSMUSP00000135244	LQEGYDHSYYFIATFIADHIR		2559.23				0	1.57759e-06	35.62	0.00788203	42.88	0.00151735	42.89	0.00151129
ENSMUSP00000135244	MYSYVTEELPQLINANFPVDPQR		2724.34				0	1.16737e-09	67.52	5.54929e-06	79.03	3.96957e-07	100.8	2.69907e-09
ENSMUSP00000135244	MSIFGHSMGGHGALICALKNPGKYR	C16(Carbamidomethyl); K19(ICPL); K23(ICPL)	2912.4	0.975227	2;1;1	8.73126	0	2.74545e-09	42.25	0.00176316	58.31	4.85507e-05	55.32	9.2536e-05
ENSMUSP00000135244	MSIFGHSMGGHGALICALKNPGKYR	C16(Carbamidomethyl); K19(ICPL:13C(6)); K23(ICPL:13C(6))	2924.42	1.01601	1;4;2	13.2063	0	5.02705e-11	46.66	0.000705582	53.17	0.000155187	70.11	3.06147e-06
ENSMUSP00000135244	MSIFGHSMGGHGALICALKNPGKYR	M8(Oxidation); C16(Carbamidomethyl); K19(ICPL:13C(6)); K23(ICPL:13C(6))	2940.42	1.29241	1;1;1	6.7865	0	9.97548e-05	25.32	0.078729	13.91	1.15836	37.49	0.00483916
ENSMUSP00000135244	MSIFGHSMGGHGALICALKNPGKYR	M8(Oxidation); C16(Carbamidomethyl); K19(ICPL); K23(ICPL)	2928.38	1.30061	-;-;1		5.9e-05	0.000436209					22.68	0.14351
ENSMUSP00000135062	LPGEAPVIHR		1088.62				0	0.000194182					34.6	0.00332867
ENSMUSP00000134976	LRDHLLESEDSHTR		1707.84				0	1.54349e-05	36.15	0.00405244	29.37	0.0170527	33.61	0.0064238
ENSMUSP00000134696	IEGSGDQVDTLELSGGAR		1803.87				0	3.1076e-08	53.36	7.38108e-05			75.14	4.82259e-07
ENSMUSP00000134696	SKLQSQLLSLEKEVEEYKNFRPDDPTR	K2(ICPL:13C(6)); K12(ICPL:13C(6)); K18(ICPL:13C(6))	3582.8	1.12353	1;-;-		0.000182	0.00256417	23.32	0.199969
ENSMUSP00000134696	RPVSSVHPPGRPPAVR		1708.97				0.005364	0.101414					10.31	0.800753
ENSMUSP00000134695	RYPAGASAPHCEMSR	C11(Carbamidomethyl)	1689.76				0	1.25579e-05	40.69	0.000349771	21.72	0.028265	40.33	0.000389269
ENSMUSP00000134676	HTPLSKLMKAYCER	K6(ICPL); K9(ICPL); C12(Carbamidomethyl)	1943.93				0.000195	0.0026447	14.7	0.686159	19.24	0.23944
ENSMUSP00000134676	HTPLSKLMKAYCER	K6(ICPL:13C(6)); K9(ICPL:13C(6)); C12(Carbamidomethyl)	1955.97	1.26454	1;2;2	1.94741	0	1.24792e-08	54.55	7.20795e-05	71.37	1.59022e-06	66.3	5.11042e-06
ENSMUSP00000134570	VYHEGLPEPLTLR		1523.82				0	4.57227e-05					29.93	0.0126523
ENSMUSP00000134570	YISVGYVDNKEFVR	K10(ICPL:13C(6))	1799.9	1.57559	-;-;1		0	2.47869e-07					66.68	4.39231e-06
ENSMUSP00000134544	WLKELR	K3(ICPL:13C(6))	955.545	1.17611	1;-;-		0.00042	0.00960013	22.36	0.0601091
ENSMUSP00000134521	LLADPTGAFGKATDLLLDDSLVSLFGNR	K11(ICPL:13C(6))	3030.6	0.87796	1;-;-		0	2.74227e-05	47.85	0.000457725
ENSMUSP00000134521	LLADPTGAFGKATDLLLDDSLVSLFGNRR	K11(ICPL)	3180.67				0	6.51032e-05	16.97	0.533414			23.88	0.10784
ENSMUSP00000134521	LLADPTGAFGKATDLLLDDSLVSLFGNRR	K11(ICPL:13C(6))	3186.69	0.967313	2;2;2	1.98517	0	9.94824e-12	104.73	8.05945e-10	63.49	1.11704e-05	72.09	1.48633e-06
ENSMUSP00000134458	LSMWDRPDDLIGR		1573.78				0.000182	0.000897338	29.22	0.0173527
ENSMUSP00000134447	AGDWKCPNPTCENMNFSWR	K5(ICPL); C6(Carbamidomethyl); C11(Carbamidomethyl)	2475.01	0.345525	1;1;-	8.97395	0	1.74679e-08	14.24	0.0375811	48.12	1.53805e-05
ENSMUSP00000134447	AGDWKCPNPTCENMNFSWR	K5(ICPL:13C(6)); C6(Carbamidomethyl); C11(Carbamidomethyl)	2481.03	2.08957	1;-;-		0	1.60416e-06	28.84	0.00352666
ENSMUSP00000134447	NECNQCKAPKPDGPGGGPGGSHMGGNYGDDR	C3(Carbamidomethyl); C6(Carbamidomethyl); K7(ICPL); K10(ICPL)	3396.36	1.06187	1;-;-		0	5.61123e-07	22.91	0.00511682			19.92	0.0101859
ENSMUSP00000134447	NECNQCKAPKPDGPGGGPGGSHMGGNYGDDR	C3(Carbamidomethyl); C6(Carbamidomethyl); K7(ICPL:13C(6)); K10(ICPL:13C(6))	3408.41	0.2982	1;-;-		0	7.74312e-08	32.87	0.000800445
ENSMUSP00000134406	KKGIEHHPNFR	K1(ICPL:13C(6)); K2(ICPL:13C(6))	1584.82	0.971742	2;-;2	12.6485	0	0.000225183	14.02	1.00853			20.64	0.219197
ENSMUSP00000134406	KKGIEHHPNFR	K1(ICPL); K2(ICPL)	1572.78				0.001372	0.0161445					15.62	0.497596
ENSMUSP00000134342;ENSMUSP00000081239	TGYTLDVTTGQR		1311.65				0	1.58518e-05	26.52	0.037772	38.05	0.00290632	28.08	0.0264514
ENSMUSP00000134342	LMMDPLTGLNR		1260.64				0	4.3987e-06	50.48	0.000187131
ENSMUSP00000134342	SGKHIGVCISVANNR	K3(ICPL:13C(6)); C8(Carbamidomethyl)	1722.88	1.29257	1;-;-		0.000182	0.00240607	19.88	0.234388
ENSMUSP00000134342	VKKLKDYAFIHFDER	K2(ICPL); K3(ICPL); K5(ICPL)	2224.1	0.9627	1;-;-		8.9e-05	0.000356113	18.55	0.416118
ENSMUSP00000134342	NLANTVTEEILEKSFSQFGKLER	K13(ICPL:13C(6)); K20(ICPL:13C(6))	2875.47	1.01018	1;1;-	7.69712	0	5.17217e-07	30.4	0.0274059	23.43	0.141176
ENSMUSP00000134342	KYGGPPPDSVYSGQQPSVGTEIFVGKIPR	K1(ICPL:13C(6)); K26(ICPL:13C(6))	3282.67	0.982657	1;1;-	2.64344	0	0.000116783	14.48	1.41868	11.12	3.07527
ENSMUSP00000134342	GFCFLEYEDHKTAAQAR	C3(Carbamidomethyl); K11(ICPL:13C(6))	2153.98	1.23152	-;1;1		0	7.50836e-06			17.83	0.168937	19.58	0.11456
ENSMUSP00000134342	NLANTVTEEILEKSFSQFGKLER	K13(ICPL); K20(ICPL)	2863.43				0.000732	0.0165356			11.1	2.59655
ENSMUSP00000134342	GFCFLEYEDHKTAAQAR	C3(Carbamidomethyl); K11(ICPL)	2147.96				0.00178	0.0258128					15.94	0.189739
ENSMUSP00000134322	KPEKKVEWSSDTVDNEHMGR	K1(ICPL:13C(6)); K4(ICPL:13C(6)); K5(ICPL:13C(6))	2705.25				0	1.3197e-10	61.24	1.21387e-05
ENSMUSP00000134318	VGLELIASENFASR		1505.8				0	3.80701e-09	58	3.00337e-05	38.78	0.0027149	31.24	0.0154083
ENSMUSP00000134318	YYGGTEFIDELEMLCQKR	C15(Carbamidomethyl); K17(ICPL:13C(6))	2363.08	1.21247	2;1;1	11.6382	0	2.77059e-07	45.99	0.000328557	22.32	0.0718019	38.52	0.00179974
ENSMUSP00000134318	ALSDALTELGYKIVTGGSDNHLILMDLR	K12(ICPL:13C(6))	3126.62	1.42485	2;-;1	18.3101	0	3.64199e-11	65.81	7.93826e-06	66.61	6.78829e-06	64.14	1.19113e-05
ENSMUSP00000134318	AEKVLEACSIACNKNTCPGDKSALRPSGLR	K3(ICPL:13C(6)); C8(Carbamidomethyl); C12(Carbamidomethyl); K14(ICPL:13C(6)); C17(Carbamidomethyl); K21(ICPL:13C(6))	3635.75	1.12859	2;2;2	2.33192	0	3.16276e-09	39.9	0.00393456	97.43	6.31607e-09	75.24	1.06525e-06
ENSMUSP00000134318	ALQAYHLDPQCWGVNVQPYSGSPANFAVYTALVEPHGR	C11(Carbamidomethyl)	4213.03				0	2.24788e-07	27.1	0.0903753	34.21	0.016064	29.66	0.0498
ENSMUSP00000134318	SKGTDGGRAEKVLEACSIACNKNTCPGDKSALRPSGLR	K2(ICPL:13C(6)); K11(ICPL:13C(6)); C16(Carbamidomethyl); C20(Carbamidomethyl); K22(ICPL:13C(6)); C25(Carbamidomethyl); K29(ICPL:13C(6))	4505.18	2.77797	1;-;-		0	8.62292e-09	53.09	0.000250118
ENSMUSP00000134318	LGTPALTSR		915.525				5.3e-05	0.000470381			34.88	0.00302331
ENSMUSP00000134318	GLLEEDFQKVAHFIHR	K9(ICPL:13C(6))	2050.06	0.998433	-;1;-		0.001453	0.0283018			10.19	2.25419
ENSMUSP00000134318	AEKVLEACSIACNKNTCPGDKSALRPSGLR	K3(ICPL); C8(Carbamidomethyl); C12(Carbamidomethyl); K14(ICPL); C17(Carbamidomethyl); K21(ICPL)	3617.71	1.16462	-;-;1		0	3.2299e-12			10.44	2.67932	90.94	2.38795e-08
ENSMUSP00000134290	SQPVYIQYSNHR		1491.73				0	1.00359e-05	11.71	0.974693	38.73	0.00188225	51.4	0.000105405
ENSMUSP00000134279	LVMAQHMIR		1098.59				0.000182	0.00210703	25.49	0.0454806
ENSMUSP00000134279	APPQTQLPSGASSGTGSASATHGGAPLPGTR		2816.38				0	1.14715e-11	57.46	6.00338e-05	69.76	3.38182e-06	63.58	1.40988e-05
ENSMUSP00000134138	TLHKIKCR	K4(ICPL); K6(ICPL); C7(Carbamidomethyl)	1265.66	0.911957	1;1;2	9.10911	0	0.000180893	21.54	0.131874	16.48	0.432943	23.4	0.0868468
ENSMUSP00000134138	TLHKIKCR	K4(ICPL:13C(6)); K6(ICPL:13C(6)); C7(Carbamidomethyl)	1277.7	0.96245	2;4;3	10.1353	0	2.58817e-05	17.85	0.223941	29.62	0.0148982	20.99	0.108676
ENSMUSP00000134138	ESVQVPDDQDFR		1434.65				0	1.16924e-05	36.08	0.0018372	32.05	0.00464682	22.15	0.0426676
ENSMUSP00000134138	LTVNADVGYYSWR		1543.75				0	1.64286e-07	27.28	0.0302115	79.79	1.65303e-07	18.62	0.216412
ENSMUSP00000134138	KKWDSNVIETFDIAR	K1(ICPL:13C(6)); K2(ICPL:13C(6))	2044.03	0.812329	1;2;2	3.9726	0	4.62453e-10	22.4	0.142134	56.54	5.64531e-05	29.91	0.0244005
ENSMUSP00000134138	MECCDVPAETLYDVLHDIEYR	C3(Carbamidomethyl); C4(Carbamidomethyl)	2628.15				0	5.44935e-05	19.64	0.0727905	18.43	0.0911536	18.24	0.0847322
ENSMUSP00000134138	DVITLR		716.43				0.007166	0.140307			18.98	0.105605
ENSMUSP00000134123;ENSMUSP00000008893	FYKLHER	K3(ICPL:13C(6))	1103.57				0.000182	0.000902447	28.66	0.0197409	20.79	0.120884	10.03	1.44002
ENSMUSP00000134123	HVFGQPAKADQCYEDVR	K8(ICPL:13C(6)); C12(Carbamidomethyl)	2130.97	1.52755	1;1;-	7.08286	0	6.4582e-09	35.46	0.00364091	45.68	0.000331235
ENSMUSP00000134107	DLQGGKAFGLLKAQQEER	K6(ICPL:13C(6)); K12(ICPL:13C(6))	2210.14	1.7172	1;-;-		0	1.03713e-07	30.63	0.0248246
ENSMUSP00000134072	TVVAGSSEAAQKAVR	K12(ICPL:13C(6))	1584.85	0.791887	-;1;1		0	4.09809e-06	68.66	2.55271e-06	38.51	0.00270583	11.46	1.36112
ENSMUSP00000134072	GAEIVADTFRDFAVSTVPVSGSSHLR		2718.37				0.001093	0.0229041			14.22	1.22048
ENSMUSP00000134035	LEKILR	K3(ICPL:13C(6))	882.55	1.73692	1;-;-		0.004549	0.109808	10.76	0.293811
ENSMUSP00000134035	RPSTFGIPR		1030.58				0	0.000151853	34.1	0.00601075	30.56	0.0119547	23.81	0.0642582
ENSMUSP00000133867	VHPEAQAKVDVFR	K8(ICPL:13C(6))	1606.84				0.001033	0.0227603	19.77	0.226166
ENSMUSP00000133867	QLVHELDEAEYQEIR		1871.91				0	1.23684e-09	62.54	1.02522e-05	101.25	1.33856e-09	78.09	2.78653e-07
ENSMUSP00000133867	GDAVAKAAKQPHVGDYR	K6(ICPL); K9(ICPL)	1992.97	0.689947	-;1;-		0	1.35975e-06	48.3	0.000343153	23.63	0.0934216	56.51	4.89152e-05
ENSMUSP00000133867	GDAVAKAAKQPHVGDYR	K6(ICPL:13C(6)); K9(ICPL:13C(6))	2005.01	1.32697	2;4;3	21.6855	0	1.37602e-08	60.31	2.21604e-05	72.52	1.32663e-06	66.97	4.65105e-06
ENSMUSP00000133859	ELPRPEGLQR		1194.66				0.007272	0.168563	17.99	0.208894
ENSMUSP00000133859	LLSPGSVMLVSAR		1329.76				0	3.02128e-08	45.22	0.000246498	86.28	1.93114e-08
ENSMUSP00000133859	DMLYQVLAAEEPSVR		1720.86				0	2.20195e-06	31.54	0.0179573	33.74	0.0107569	23.58	0.112264
ENSMUSP00000133859	VLSYAPGPLDNDMQQLAR		1987.99				0	3.53708e-08	69.33	2.90536e-06	71.56	1.74209e-06	50.72	0.000209265
ENSMUSP00000133859	VLSYAPGPLDNDMQQLAR	M13(Oxidation)	2003.99				0	6.82324e-06	42.34	0.00119023	49.58	0.000224163	49.75	0.000215558
ENSMUSP00000133859	QLKEELGAQQPDLKVVLAAADLGTEAGVQR	K3(ICPL); K14(ICPL)	3357.74	0.786737	1;-;-		0	1.92672e-05	26.78	0.0682155
ENSMUSP00000133859	QLKEELGAQQPDLKVVLAAADLGTEAGVQR	K3(ICPL:13C(6)); K14(ICPL:13C(6))	3369.8				0.000182	0.000867525	25.96	0.0605896
ENSMUSP00000133859	ALAPQLAR		839.51				0.001837	0.0374099			12.78	0.0790845	12.3	0.206095
ENSMUSP00000133859	DMLYQVLAAEEPSVR	M2(Oxidation)	1736.85				0.000353	0.0024078					22.62	0.123079
ENSMUSP00000133847	AYLEGTCVEWLR	C7(Carbamidomethyl)	1496.72				0	5.82436e-05	34.3	0.00481138
ENSMUSP00000133678	SVLAWHSR		955.51				8.9e-05	0.000374595	32.22	0.00539812			31.84	0.00582626
ENSMUSP00000133678	ETCPSLQGVHNTSYPR	C3(Carbamidomethyl)	1845.85				0.000128	0.000476762	22.16	0.0781453
ENSMUSP00000133609	XKNRDGKMDKEETKDWILPSDYDHAEAEAR	X1(N); K2(ICPL:13C(6)); K7(ICPL:13C(6)); K10(ICPL:13C(6)); K14(ICPL:13C(6))	4005.81				0	2.26839e-05	23.29	0.0785262
ENSMUSP00000133609	XKNRDGKMDKEETKDWILPSDYDHAEAEAR	X1(K); X1(ICPL); K2(ICPL); K7(ICPL:13C(6)); K14(ICPL:13C(6))	4007.82				0	3.10421e-06	46.95	0.000399637
ENSMUSP00000133609	XKNRDGKMDKEETKDWILPSDYDHAEAEAR	X1(Q); N-Term(ICPL:13C(6)); K7(ICPL); K10(ICPL); K14(ICPL:13C(6))	4007.83				0.006443	0.131221			26.81	0.0458588
ENSMUSP00000133609	XKNRDGKMDKEETKDWILPSDYDHAEAEAR	X1(T); N-Term(ICPL:13C(6)); K7(ICPL:13C(6)); M8(Oxidation); K10(ICPL:13C(6)); K14(ICPL:13C(6))	4008.84				5.3e-05	0.000206644			23.74	0.077771
ENSMUSP00000133609	XKNRDGKMDKEETKDWILPSDYDHAEAEAR	X1(I); K2(ICPL:13C(6)); K7(ICPL); M8(Oxidation); K10(ICPL); K14(ICPL:13C(6))	4008.84				5.3e-05	0.00011551			23.65	0.0793995
ENSMUSP00000133605	VVNSETPVVVDFHAQWCGPCKILGPR	C17(Carbamidomethyl); C20(Carbamidomethyl); K21(ICPL:13C(6))	3076.52	1.1826	1;1;1	2.20261	0	2.92339e-08	61.61	2.48141e-05	45.86	0.000968926	37.27	0.00679686
ENSMUSP00000133349	FLSNCNPEQLER	C5(Carbamidomethyl)	1506.7				0.000128	0.000696618	28.33	0.0144689
ENSMUSP00000133282	QTPAAPETEEEPYR		1617.74				0.000182	0.00286631	28.85	0.00788416	17.56	0.108741
ENSMUSP00000133282	TSDGKVITVPHKIITHLR	K5(ICPL); K12(ICPL)	2225.22	1.16456	1;-;-		0	2.41294e-05	18.48	0.263945
ENSMUSP00000133282	TSDGKVITVPHKIITHLR	K5(ICPL:13C(6)); K12(ICPL:13C(6))	2237.26	1.10458	1;1;1	17.311	0	1.04095e-05	14.79	0.416528	23.21	0.0582586	13.47	0.562225
ENSMUSP00000133099	EKAEEDRYFR	K2(ICPL)	1447.66	0.89059	1;1;1	6.77715	0.00075	0.0153238	29.26	0.00913042	29.47	0.00875592	30.21	0.00724125
ENSMUSP00000133099	EKAEEDRYFR	K2(ICPL:13C(6))	1453.68	0.859274	-;1;1		0.001453	0.0289123			27.88	0.0209365	22.26	0.0766637
ENSMUSP00000133099	EKTKEQLAALR	K2(ICPL); K4(ICPL)	1496.79	0.924184	-;1;-		4.9e-05	0.000183371	36	0.00440836	18.96	0.217903
ENSMUSP00000133099	EKTKEQLAALR	K2(ICPL:13C(6)); K4(ICPL:13C(6))	1508.82	0.857169	2;-;1	3.76016	0	2.99368e-05	44.71	0.000542594	10.07	1.55966	13.92	0.638676
ENSMUSP00000133099	HKKKIQQLKNNH	K2(ICPL); K3(ICPL); K4(ICPL); K9(ICPL)	1935.97	0.777037	1;2;-	7.99584	0	1.15908e-05	39.97	0.00232601	41.87	0.0015083	39.46	0.00255356
ENSMUSP00000133099	HKKKIQQLKNNH	K2(ICPL:13C(6)); K3(ICPL:13C(6)); K4(ICPL:13C(6)); K9(ICPL:13C(6))	1960.05	0.831282	1;-;2	1.34631	0	2.56009e-05	37.65	0.00274865	23.85	0.0671719	41.83	0.00104983
ENSMUSP00000133099	KHHEDEIDHHSKEIER	K1(ICPL); K12(ICPL)	2249.01	0.883977	-;1;-		0	2.05067e-09	25.51	0.0195427	47.04	0.00014333	45.95	0.000226147
ENSMUSP00000133099	KHHEDEIDHHSKEIER	K1(ICPL:13C(6)); K12(ICPL:13C(6))	2261.05	0.873189	2;1;2	3.37593	0	1.27815e-09	58.12	2.55151e-05	67.07	3.26899e-06	52.86	8.87696e-05
ENSMUSP00000133038	YGEPSEVFINR		1310.64				0.00186	0.0492011	19.09	0.151672
ENSMUSP00000133038	FAQPGTFEFEYASR		1649.76				0	2.65735e-07	54.59	2.64127e-05
ENSMUSP00000133038	HEHQLMLMR		1194.59				5.3e-05	0.000252312			20.5	0.115863	15.41	0.378378
ENSMUSP00000132783	LLKEKGLLLR	K3(ICPL:13C(6)); K5(ICPL:13C(6))	1404.88	0.926136	-;-;1		0.00017	0.000888					20.79	0.0166736
ENSMUSP00000132771	GLQATQLAQGLGYTGAR		1704.9				0	8.11521e-10	77.18	3.60837e-07	58.57	2.69651e-05	42.91	0.000984988
ENSMUSP00000132771	RGLQATQLAQGLGYTGAR		1861				0	7.30915e-08	44.6	0.000677871	52.07	0.000117344	77.18	3.79023e-07
ENSMUSP00000132771	NYAGAYKEWLEKQG	K7(ICPL); K12(ICPL)	1866.84	1.18337	1;1;1	32.6261	0	3.16578e-06	46.91	0.000193519	44.64	0.00032638	39.5	0.00107714
ENSMUSP00000132771	NYAGAYKEWLEKQG	K7(ICPL:13C(6)); K12(ICPL:13C(6))	1878.89				0	1.63018e-06	36.26	0.00360803			23.87	0.0625561
ENSMUSP00000132604	GGYIGSTYFER		1249.59				0.001065	0.023955	21.53	0.0745257
ENSMUSP00000132590	GDFCIQVGR	C4(Carbamidomethyl)	1051.5				0	0.000126481	42.64	0.000577173	37	0.00209503	36.05	0.00273145
ENSMUSP00000132590	LVAMKFLR	K5(ICPL)	1082.62	1.11683	-;1;-		0.000352	0.00832927	23	0.0511211	11.58	0.708925	22.88	0.0571904
ENSMUSP00000132590	LVAMKFLR	K5(ICPL:13C(6))	1088.64	1.01183	2;4;4	3.69962	0	6.31136e-05	46.83	0.000149394	33.45	0.00325336	42.07	0.000447026
ENSMUSP00000132590	GLVGEIIKR	K8(ICPL)	1089.64	0.969653	2;-;3	6.61104	0	4.05835e-05	44.69	0.000154529	47.66	8.48409e-05	52.08	2.81846e-05
ENSMUSP00000132590	GLVGEIIKR	K8(ICPL:13C(6))	1095.66	1.05734	3;5;3	8.02766	0	3.9289e-05	43.17	0.000144584	47.71	5.08301e-05	49.91	3.01177e-05
ENSMUSP00000132590	LVAMKFLR	M4(Oxidation); K5(ICPL)	1098.61				0.000182	0.00101382	39.72	0.000997267
ENSMUSP00000132590	LVAMKFLR	M4(Oxidation); K5(ICPL:13C(6))	1104.63	1.0252	3;2;3	4.89834	0.000128	0.000479553	45.12	0.000215327	28.28	0.0104015	27.11	0.0136175
ENSMUSP00000132590	TFIAIKPDGVQR	K6(ICPL)	1449.78				5.9e-05	0.000541662	11.93	0.91693			34.87	0.00495272
ENSMUSP00000132590	TFIAIKPDGVQR	K6(ICPL:13C(6))	1455.8	0.994652	6;4;3	5.33614	0	9.54007e-07	64.09	4.79629e-06	49.23	0.0001391	47.12	0.000238729
ENSMUSP00000132590	VMLGETNPADSKPGTIR	K12(ICPL)	1890.94	0.960425	-;-;1		0	1.59287e-09	37.21	0.00388771	61.08	1.51287e-05	72.55	1.09791e-06
ENSMUSP00000132590	VMLGETNPADSKPGTIR	K12(ICPL:13C(6))	1896.96	1.0733	3;6;1	6.64952	0	5.36572e-11	63.37	1.19667e-05	85.33	7.97203e-08	93.49	1.17972e-08
ENSMUSP00000132590	VMLGETNPADSKPGTIR	M2(Oxidation); K12(ICPL:13C(6))	1912.95	0.989877	1;1;1	3.89776	0	1.11432e-11	96.87	5.2014e-09	98.5	3.70085e-09	77.56	4.56886e-07
ENSMUSP00000132590	FEQKGFR	K4(ICPL)	1016.49				0.000323	0.00663144			26.89	0.0217946
ENSMUSP00000132590	FEQKGFR	K4(ICPL:13C(6))	1022.51	1.09816	-;2;-		0.000323	0.00591048			33.54	0.00515615
ENSMUSP00000132590	VMLGETNPADSKPGTIR	M2(Oxidation); K12(ICPL)	1906.93				0	1.43182e-08			56.6	4.46303e-05
ENSMUSP00000132321	SQNTPDSSASNLGFR		1580.73				0	2.20828e-06	55.91	2.25675e-05
ENSMUSP00000132169	LNILGGLR		855.541				0.000323	0.0044552			26.14	0.00242644
ENSMUSP00000131943	LLGLTGSTEQVAHASR		1639.88				0	3.63482e-05	35.51	0.00445686	13.85	0.63257
ENSMUSP00000131658	ALAHSELDVR		1110.59				0	0.000306087	20.27	0.133911	32.42	0.00816234	28.88	0.0179893
ENSMUSP00000131514	GLQVHVVVDACSSR	C11(Carbamidomethyl)	1526.77				0	9.22034e-08	58.18	5.29151e-05	61.31	2.54424e-05	61.21	2.63378e-05
ENSMUSP00000131514	QSGAFLATSESLILQLVR		1933.08				0	1.30468e-10	88.13	1.96884e-08
ENSMUSP00000131514	SQLQSVLLCGIETQACILNTALDLLHR	C9(Carbamidomethyl); C16(Carbamidomethyl)	3066.61				0	9.81473e-11	77.34	5.60885e-07	59.98	3.0691e-05	42.2	0.00183479
ENSMUSP00000131514	ILPESSILFLCDLQEKFRPSIAYFPQIVSVAAR	C11(Carbamidomethyl); K16(ICPL)	3913.07				0.000182	0.00411747	13.36	1.24786
ENSMUSP00000131514	ILPESSILFLCDLQEKFRPSIAYFPQIVSVAAR	C11(Carbamidomethyl); K16(ICPL:13C(6))	3919.09	0.990092	1;-;-		0	1.42017e-09	37.68	0.00411166			69.77	2.84157e-06
ENSMUSP00000131323	LIVENLSSR		1030.59				8.9e-05	0.000189173	25.46	0.0287291	16.11	0.247355	14	0.402088
ENSMUSP00000131323	IRDIDLKR	K7(ICPL:13C(6))	1139.66	2.77302	-;1;1		0.000357	0.00721587	13.95	0.302038	30.84	0.00609862	29.31	0.00879147
ENSMUSP00000130858	KFFVGGNWKMNGR	K1(ICPL); K9(ICPL)	1750.83	0.856279	1;-;-		0	4.53856e-06	35.34	0.00416692	41.39	0.00108916	37.77	0.00231446
ENSMUSP00000130858	KFFVGGNWKMNGR	K1(ICPL:13C(6)); K9(ICPL:13C(6))	1762.87	0.789739	1;2;1	6.04033	0	7.7902e-07	54.83	6.57703e-05	59.99	2.01965e-05	63.85	8.30377e-06
ENSMUSP00000130858	GWLKSNVNDGVAQSTR	K4(ICPL)	1836.9	0.832929	-;1;2		0	4.57394e-10	80.97	1.51969e-07	93.98	7.79892e-09	77.6	3.23231e-07
ENSMUSP00000130858	GWLKSNVNDGVAQSTR	K4(ICPL:13C(6))	1842.92	0.85123	3;4;1	2.69664	0	5.96243e-11	89.5	2.37868e-08	74.87	6.90774e-07	111.24	1.6423e-10
ENSMUSP00000130858	HVFGESDELIGQKVSHALAEGLGVIACIGEKLDER	K13(ICPL); C27(Carbamidomethyl); K31(ICPL)	3986.96	0.95272	1;-;-		0	1.15629e-09	56.56	9.66002e-05
ENSMUSP00000130858	HVFGESDELIGQKVSHALAEGLGVIACIGEKLDER	K13(ICPL:13C(6)); C27(Carbamidomethyl); K31(ICPL:13C(6))	3998.99	1.03036	-;-;1		0	2.07437e-05	23.48	0.214725			27.92	0.0811215
ENSMUSP00000130858	KKCLGELICTLNAANVPAGTEVVCAPPTAYIDFAR	K1(ICPL:13C(6)); K2(ICPL:13C(6)); C3(Carbamidomethyl); C9(Carbamidomethyl); C24(Carbamidomethyl)	4042	0.897583	2;1;-	5.01107	0	5.00147e-08	38.58	0.00585211	15.23	1.30314	37.74	0.00699992
ENSMUSP00000130858	RHVFGESDELIGQKVSHALAEGLGVIACIGEKLDER	K14(ICPL); C28(Carbamidomethyl); K32(ICPL)	4143.08	0.960139	-;-;1		0	7.29203e-08	35.93	0.0128146			28.44	0.0722539
ENSMUSP00000130858	RHVFGESDELIGQKVSHALAEGLGVIACIGEKLDER	K14(ICPL:13C(6)); C28(Carbamidomethyl); K32(ICPL:13C(6))	4155.1	0.923638	-;-;1		0	5.1156e-09	50.98	0.000395805	14.75	1.61286	30.77	0.0391545
ENSMUSP00000130858	KKCLGELICTLNAANVPAGTEVVCAPPTAYIDFAR	K1(ICPL); K2(ICPL); C3(Carbamidomethyl); C9(Carbamidomethyl); C24(Carbamidomethyl)	4029.96				0	2.63279e-07					65.9	1.09242e-05
ENSMUSP00000130722	APQQWATFAR		1175.59				0	3.36816e-05	26.6	0.0264719			37.96	0.00201544
ENSMUSP00000130722	LDEYTQEEIEAFPR		1739.81				0.000182	0.00175992	43.39	0.000510828
ENSMUSP00000130703	LIGPNCPGVINPGECKIGIMPGHIHKKGR	C6(Carbamidomethyl); C15(Carbamidomethyl); K16(ICPL); K26(ICPL); K27(ICPL)	3464.73	1.11106	1;1;1	27.785	0	1.36247e-08	56.13	0.000109701	55.82	0.000118211	64.64	1.54601e-05
ENSMUSP00000130703	LIGPNCPGVINPGECKIGIMPGHIHKKGR	C6(Carbamidomethyl); C15(Carbamidomethyl); K16(ICPL); M20(Oxidation); K26(ICPL); K27(ICPL)	3480.72	0.895164	1;-;1	8.76661	0	4.56803e-06	28.31	0.0580691			24.54	0.138691
ENSMUSP00000130703	LIGPNCPGVINPGECKIGIMPGHIHKKGR	C6(Carbamidomethyl); C15(Carbamidomethyl); K16(ICPL:13C(6)); K26(ICPL:13C(6)); K27(ICPL:13C(6))	3482.79	1.10349	3;4;2	9.84921	0	1.81821e-09	59.37	4.08108e-05	69.03	4.3384e-06	64.56	1.24755e-05
ENSMUSP00000130703	LIGPNCPGVINPGECKIGIMPGHIHKKGR	C6(Carbamidomethyl); C15(Carbamidomethyl); K16(ICPL:13C(6)); M20(Oxidation); K26(ICPL:13C(6)); K27(ICPL:13C(6))	3498.78	0.950791	1;1;1	39.2869	0	8.47706e-05	16.88	0.751751	15.75	1.02172	16.67	0.828821
ENSMUSP00000130580	VHMTWVQPR		1153.59				0	0.000184752	19.62	0.177905	27.29	0.0294888	37.49	0.00279833
ENSMUSP00000130580	VNPLSLVEIILHVVR		1701.04				0	2.70212e-06			21.92	0.0122111	13.78	0.0795708
ENSMUSP00000130580	FQTLKCAWGQQPDLAANEAQLLR	K5(ICPL:13C(6)); C6(Carbamidomethyl)	2769.39				0.000647	0.0153471			10.3	3.43438
ENSMUSP00000130303	IAFQLDDGSR		1121.56				0.001453	0.027735			23.81	0.0534445
ENSMUSP00000130195	AFVKMCR	K4(ICPL); C6(Carbamidomethyl)	1016.48				0.000182	0.00262314	27.79	0.0123924
ENSMUSP00000130195	AFVKMCR	K4(ICPL:13C(6)); C6(Carbamidomethyl)	1022.5				0.001617	0.0415653	18.86	0.215178
ENSMUSP00000130195	LAILYAKR	K7(ICPL)	1052.62	1.01376	1;1;2	12.6514	8.9e-05	0.000411007	31.13	0.0160348	17.71	0.347339	27.53	0.0367336
ENSMUSP00000130195	LAILYAKR	K7(ICPL:13C(6))	1058.65	1.06929	1;2;-	0.541371	0	7.76278e-05	33.6	0.00886127	29	0.0253044
ENSMUSP00000130195	QDPSVLHTEEMR		1441.68				0	1.87673e-05	40.75	0.000875051	23.14	0.0497421	31.33	0.00725164
ENSMUSP00000130195	ASVFVKLQKPNAAIR	K6(ICPL); K9(ICPL)	1852.02	1.01332	1;-;-		0	8.84236e-06	29.91	0.0124044
ENSMUSP00000130195	ASVFVKLQKPNAAIR	K6(ICPL:13C(6)); K9(ICPL:13C(6))	1864.06	0.96788	2;1;1	5.74722	0	3.66222e-06	26.67	0.0127014	53.09	2.87181e-05	37.24	0.00126495
ENSMUSP00000130195	AIEINPDSAQPYKWR	K13(ICPL)	1892.93	0.808469	-;-;1		0	5.34034e-06	48.74	0.000258631			62.39	1.08144e-05
ENSMUSP00000130195	AIEINPDSAQPYKWR	K13(ICPL:13C(6))	1898.95	0.987652	3;2;1	14.9125	0	2.51356e-08	56.95	4.17802e-05	43.44	0.000966936	43.16	0.00102167
ENSMUSP00000130195	EWVESMGGKVPPATHKAKSEENTKEEKR	K9(ICPL:13C(6)); K16(ICPL:13C(6)); K18(ICPL:13C(6)); K24(ICPL:13C(6)); K27(ICPL:13C(6))	3737.8	0.989943	1;-;-		0	6.02191e-09	66.73	9.2255e-06
ENSMUSP00000130195	LLGHWEEAAHDLALACKLDYDEDASAMLR	C16(Carbamidomethyl); K17(ICPL:13C(6))	3424.6	0.984381	-;2;-		0	7.4069e-10			41.42	0.00201189	57.1	5.39132e-05
ENSMUSP00000130195	LLGHWEEAAHDLALACKLDYDEDASAMLR	C16(Carbamidomethyl); K17(ICPL)	3418.59				0	2.96546e-08					44.71	0.000944891
ENSMUSP00000129970;ENSMUSP00000031513	LRVEFPR		916.536				0.001276	0.0322751	28.37	0.0121531	26.89	0.0170878	32.19	0.00504297
ENSMUSP00000129970	DGTGVVEFVR		1078.55				0.000182	0.00249414	17.64	0.222121
ENSMUSP00000129970	EAGDVCYADVYR	C6(Carbamidomethyl)	1417.61				0.000216	0.00119516					31.03	0.00201159
ENSMUSP00000129739	LQQEETQLEQSIQAGR		1857.93				0	1.6507e-09	89.56	2.30731e-08
ENSMUSP00000129739	SKLSQLQESHLEAHR	K2(ICPL:13C(6))	1873.96	0.872908	-;1;-		0	1.74542e-06	31.6	0.0169153	29.36	0.0290274
ENSMUSP00000129544;ENSMUSP00000018637;ENSMUSP00000018632;ENSMUSP00000019625	LQNEVEDLMLDVER		1702.83				0	1.1076e-09	98.33	2.43107e-09	47.55	0.000290936	75.04	5.18559e-07
ENSMUSP00000129544	VRELEGEVESEQKR	K13(ICPL)	1792.88				0	3.04756e-06	36.23	0.00525301			33.52	0.00980412
ENSMUSP00000129544	MKKNMEQTVKDLQLR	K2(ICPL); K3(ICPL); K10(ICPL)	2177.06				0	3.7258e-06	22.21	0.160814
ENSMUSP00000129544	QLEEEVKAKNALAHALQSSR	K7(ICPL); K9(ICPL)	2432.23				0.000128	0.000604815	13.17	1.38319
ENSMUSP00000129544	SLGTELFKMKNAYEESLDQLETLKR	K8(ICPL); K10(ICPL); K24(ICPL)	3258.58				0	6.53725e-09	35.35	0.00933577	35.33	0.00993573	45.12	0.0009459
ENSMUSP00000129544	NFDKILAEWKQKYEETHAELEASQKEAR	K4(ICPL); K10(ICPL); K12(ICPL); K25(ICPL)	3811.78				0	9.79621e-10	57.25	5.09527e-05	29.36	0.0316926	51.47	0.000193896
ENSMUSP00000129544	LKKKEFEMSNLQSKIEDEQAIGIQLQKKIKELQAR	K2(ICPL); K3(ICPL); K4(ICPL); K14(ICPL); K27(ICPL); K28(ICPL); K30(ICPL)	4877.45				0.000265	0.0014539					44.07	0.00218788
ENSMUSP00000129492	TQDLPGVKLKVVR	K8(ICPL:13C(6)); K10(ICPL:13C(6))	1674.97				0	6.76425e-08	46.71	0.000120517
ENSMUSP00000129492	LSTGKEAVCFIPGEGHTLQEHHVVLVEGGR	K5(ICPL:13C(6)); C9(Carbamidomethyl)	3367.69	1.17592	1;1;-	4.3766	5.3e-05	0.000386278	12.94	2.40613	15.67	1.29412
ENSMUSP00000129426	KHNMCGDTEEEKIR	K1(ICPL:13C(6)); C5(Carbamidomethyl); K12(ICPL:13C(6))	1968.87	1.45935	1;-;-		0	2.12689e-08	37.43	0.00132827
ENSMUSP00000129426	YICGEAPDYDR	C3(Carbamidomethyl)	1358.57				0.000195	0.00291008			26.16	0.00508416	27.24	0.00396478
ENSMUSP00000129355	ILHGGMIDR		1011.54				0	6.05955e-05	18.18	0.145973	43.88	0.00039289	32.03	0.00601549
ENSMUSP00000129224	LPVQNGPIVHR		1229.71				0	5.96311e-05	14.45	0.296111	16.28	0.194292	56.71	1.75976e-05
ENSMUSP00000129224	VQHRLPVQNGPIVHR		1750				0	0.000213633					11.47	0.50969
ENSMUSP00000129120	ETVHVAPAPDTYR		1455.72				0.000128	0.000561786	25.75	0.0413743	24.8	0.0506631	17.78	0.264259
ENSMUSP00000129023	AQTYELQESNVR		1437.7				0	5.53937e-07			86.43	2.94625e-08	63.18	6.27495e-06
ENSMUSP00000128967	FYAVQKLAR	K6(ICPL:13C(6))	1206.67	0.821534	2;1;3	1.69023	0	5.53918e-05	29.07	0.0122641	41.51	0.000699254	35.95	0.00251556
ENSMUSP00000128967	RVAQDWLKEAR	K8(ICPL:13C(6))	1482.79				0	0.000110052	20.53	0.13144	22.92	0.07581	33.95	0.00626225
ENSMUSP00000128967	EIAGATPHITAAEGR		1493.77				0	2.1532e-09	67.08	3.34962e-06	59.22	2.12421e-05	84.16	6.52302e-08
ENSMUSP00000128967	TFDSAVAKALEHHR	K8(ICPL:13C(6))	1692.85	0.892568	2;1;1	5.59887	0	1.6252e-06	19.13	0.240084	11.46	1.40399	31.73	0.0136971
ENSMUSP00000128967	GIEQAVQSHAVAEEEAR		1823.89				0	2.77136e-10	99.81	1.92229e-09	59.82	1.91786e-05	87.93	3.01996e-08
ENSMUSP00000128967	SQEQMDSFTLDINTAYAR		2089.95				0	9.14058e-06	50.94	8.57728e-05			57.32	2.15936e-05
ENSMUSP00000128967	LRGIEQAVQSHAVAEEEAR		2093.07				0	7.00749e-07	42.98	0.00135945	45.25	0.000807546	40.99	0.00214565
ENSMUSP00000128967	VNCSDNEFTQALTAAIPPESLTR	C3(Carbamidomethyl)	2534.22				0	8.99056e-06	26.02	0.0622586			43.4	0.00110158
ENSMUSP00000128967	DVLKVQEQELKYEFEQGLSEKLSEQELEFR	K4(ICPL:13C(6)); K11(ICPL:13C(6)); K21(ICPL:13C(6))	4003.97	0.935704	-;-;1		0	3.29723e-05	14.87	1.37666			29.97	0.0435498
ENSMUSP00000128967	KAVDEAADALLKAKEELEKMKTIIEDAKKR	K1(ICPL:13C(6)); K12(ICPL:13C(6)); K14(ICPL:13C(6)); K19(ICPL:13C(6)); K21(ICPL:13C(6)); K28(ICPL:13C(6)); K29(ICPL:13C(6))	4162.18				0.000911	0.0179289	15.11	1.13615
ENSMUSP00000128967	LHNMIVDLDNVVKKVQAAQSEAKVVSQYHELVVQAR	K13(ICPL:13C(6)); K14(ICPL:13C(6)); K23(ICPL:13C(6))	4392.32	1.14942	1;-;-		0	4.36625e-06	29.1	0.0369081
ENSMUSP00000128967	GVYSEETLR		1053.52				0.004835	0.0972638			19.85	0.121112
ENSMUSP00000128967	ELAQQKATEKQHIELALEKHKLEEKR	K6(ICPL:13C(6)); K10(ICPL:13C(6)); K19(ICPL:13C(6)); K21(ICPL:13C(6)); K25(ICPL:13C(6))	3682.93				5.3e-05	0.000289129			16.86	0.685159
ENSMUSP00000128967	TVEGALKER	K7(ICPL)	1107.58	0.741942	-;-;1		0.00298	0.04311					16.61	0.341597
ENSMUSP00000128967	FYAVQKLAR	K6(ICPL)	1200.65				0.000306	0.00221548					29.06	0.017259
ENSMUSP00000128915	REPKNLKDIR	K4(ICPL:13C(6)); K7(ICPL:13C(6))	1490.83	0.95937	-;1;-		0.000195	0.00268911			25.9	0.0281458
ENSMUSP00000128803;ENSMUSP00000112861;ENSMUSP00000078715	VFDKEGNGTVMGAEIR	K4(ICPL:13C(6)); M11(Oxidation)	1849.88				0	4.39379e-05			36.96	0.00319175
ENSMUSP00000128803	TGDGKILYSQCGDVMR	K5(ICPL); C11(Carbamidomethyl)	1904.86	1.08163	1;-;1	5.53207	0	2.59233e-06	49.76	9.29999e-05			59.8	9.79065e-06
ENSMUSP00000128803	TGDGKILYSQCGDVMR	K5(ICPL:13C(6)); C11(Carbamidomethyl)	1910.88	1.15925	1;2;1	2.48866	0	9.97539e-07	38.77	0.00159951	54.6	4.19552e-05	44.87	0.000348645
ENSMUSP00000128803	TGDGKILYSQCGDVMR	K5(ICPL:13C(6)); C11(Carbamidomethyl); M15(Oxidation)	1926.88	1.06344	-;1;-		0	1.61173e-07	56.12	2.51673e-05	38.93	0.00127298
ENSMUSP00000128803	HVLVTLGEKMTEEEVEMLVAGHEDSNGCINYEELVR	K9(ICPL:13C(6)); C28(Carbamidomethyl)	4240.98				0.000182	0.00278787	14.12	1.09981
ENSMUSP00000128487	RFDSELSQAHEETQR		1832.85				0	2.09021e-08			37.43	0.00174392
ENSMUSP00000128487	DLEAKVKDQEEELDEQAGSIQMLEQAKLR	K5(ICPL:13C(6)); K7(ICPL:13C(6)); K27(ICPL:13C(6))	3676.82				0	2.38981e-07			30.88	0.041809
ENSMUSP00000128487	NTGESASQLLDAETAER		1791.84				0	1.99184e-07					60.14	1.00217e-05
ENSMUSP00000128298	LPSLNKLR	K6(ICPL:13C(6))	1051.63				5.3e-05	0.000483847	23.41	0.0136811	30.32	0.00283335	22.58	0.0165623
ENSMUSP00000128298	LPSLNKLR	K6(ICPL)	1045.62				0.00017	0.000809034					33.16	0.00251191
ENSMUSP00000127885	DNMFSGSKINYTEDR	K8(ICPL:13C(6))	1887.83	1.22192	2;-;1	19.6266	0	7.26737e-10	75.28	1.09699e-07			132.47	1.86859e-13
ENSMUSP00000127833	EYFGGFGEVESIELPMDNKTNKR	K19(ICPL); K22(ICPL)	2870.31				0	1.05903e-05	13.65	0.709849			13.88	0.685512
ENSMUSP00000127833	EYFGGFGEVESIELPMDNKTNKR	K19(ICPL:13C(6)); K22(ICPL:13C(6))	2882.35	0.854976	1;1;1	0.711927	0	2.62524e-11	77.39	3.94873e-07	31.99	0.0123637	55.23	6.68813e-05
ENSMUSP00000127833	AKAMKTKEPVKKIFVGGLSPDTPEEKIR	K2(ICPL); K5(ICPL); K7(ICPL); K11(ICPL); K12(ICPL); K26(ICPL)	3727.88	0.871888	1;1;1	4.71418	0	1.43279e-07	48.56	0.000648514	30.15	0.0447282	49.28	0.000549439
ENSMUSP00000127833	AKAMKTKEPVKKIFVGGLSPDTPEEKIR	K2(ICPL:13C(6)); K5(ICPL:13C(6)); K7(ICPL:13C(6)); K11(ICPL:13C(6)); K12(ICPL:13C(6)); K26(ICPL:13C(6))	3764	1.63933	-;-;1		0	1.31005e-08			64.47	8.66387e-06	29.55	0.0319997
ENSMUSP00000127808	FQLLDR		791.441				0.003269	0.0652905			21.39	0.0591776
ENSMUSP00000127774	RGDDSFGDKYR	K9(ICPL:13C(6))	1426.64	1.2408	1;-;-		0	1.4468e-05	46.55	0.000110655	33.8	0.0020635	20.72	0.0478683
ENSMUSP00000127774	LQKEQEKLQR	K3(ICPL:13C(6)); K7(ICPL:13C(6))	1521.82	0.974494	2;1;-	46.4794	0	7.07777e-06	62.89	7.71065e-06	40.63	0.00126718
ENSMUSP00000127774	ARPTTDSFDDYPPR		1637.76				0	0.000149865	17.17	0.188989	32.32	0.00577346
ENSMUSP00000127774	AASIFGGAKPVDTAAR	K9(ICPL:13C(6))	1642.87	1.11943	2;1;-	1.2302	0	1.35172e-05	53.83	0.000112194	19.17	0.22275
ENSMUSP00000127774	SRLPKSPPYTAFLGNLPYDVTEDSIKDFFR	K5(ICPL:13C(6)); K26(ICPL:13C(6))	3695.86				0.001215	0.0291886	11.13	3.48063
ENSMUSP00000127774	LNLKPR	K4(ICPL:13C(6))	851.519	1.10109	-;1;-		0.003998	0.085472			10.74	0.21505
ENSMUSP00000127774	AASIFGGAKPVDTAAR	K9(ICPL)	1636.84				0.002418	0.0460245			17.27	0.422811
ENSMUSP00000127774	LQKEQEKLQR	K3(ICPL); K7(ICPL)	1509.78	1.10973	-;-;1		5.9e-05	0.000611451					16.41	0.459405
ENSMUSP00000127593	AFIITGQTYTR		1270.68				0	9.70314e-06	48.01	0.000261697
ENSMUSP00000127593	VLSQQAAAVVKQEGGDNDLIER	K11(ICPL:13C(6))	2451.26	0.696021	1;1;-	14.263	0	1.40736e-07	29.73	0.0351699	14.16	1.26623
ENSMUSP00000127526	IAEFAFEYAR		1216.6				0	2.29652e-06	51.1	9.1209e-05
ENSMUSP00000127526	MSDGLFLQKCR	K9(ICPL); C10(Carbamidomethyl)	1459.68				0	1.89541e-05	43.06	0.000467124
ENSMUSP00000127526	MSDGLFLQKCR	K9(ICPL:13C(6)); C10(Carbamidomethyl)	1465.7	0.707596	2;-;-		0	1.49941e-07	59.53	1.35387e-05
ENSMUSP00000127526	SNVTAVHKANIMR	K8(ICPL)	1545.8	0.63838	2;-;1	7.82589	0	3.3959e-08	59.25	2.09771e-05	53.32	8.38055e-05	47.49	0.000305678
ENSMUSP00000127526	SNVTAVHKANIMR	K8(ICPL:13C(6))	1551.82	0.638165	-;1;1		0	2.43526e-07	51.95	0.000114887	65.92	4.50311e-06	55.12	4.90637e-05
ENSMUSP00000127526	KTFDLYANVRPCVSIEGYKTPYTDVNIVTIR	K1(ICPL); C12(Carbamidomethyl); K19(ICPL)	3842.95				8.9e-05	0.000238811	13.79	1.82174
ENSMUSP00000127503	SHMPYTDAMIHEVQR		1814.83				0	5.22935e-07	35.36	0.00311447			38.1	0.00181212
ENSMUSP00000127503	VQEEAQCLVEELR	C7(Carbamidomethyl)	1602.78				0	1.07163e-06					49.18	0.000190835
ENSMUSP00000127487	GHAVSYPASIR		1157.6				0.000182	0.00417018	20.1	0.125575			29.4	0.0172223
ENSMUSP00000127487	HGPVSVEGTTDPVPAGQGPGDPGPR		2381.15				0.001528	0.0186943					17.02	0.522343
ENSMUSP00000127346	GNWGYLDQVAALR		1462.74				0	7.40126e-06	25.22	0.0503518	53.5	7.79463e-05	57.51	3.09596e-05
ENSMUSP00000127346	ETLPAVLKNTAAR	K8(ICPL:13C(6))	1494.84	1.19982	1;-;-		0.000182	0.00237636	24.58	0.0397105
ENSMUSP00000127346	WVQKNIAYFGGNR	K4(ICPL:13C(6))	1663.84	1.10532	2;-;-		0	3.32058e-08	47.07	0.000404452
ENSMUSP00000127346	EMLGDFMFVIPALQVAHFQR		2349.19				0	2.37923e-06	51.9	0.000221459	36.12	0.0084054	35.7	0.00929925
ENSMUSP00000127346	NGNPNSEGLPSWPVLDHDEQYLQLDTQPAVGR		3546.69				0	8.07244e-09	49.36	0.000381238	53.52	0.000148729	38.63	0.00424288
ENSMUSP00000127346	MMLPPECSHLLVEEYMGDTEDPETLQAQFR	C7(Carbamidomethyl)	3566.59				0	3.96784e-08	35.26	0.00332105	27	0.0205512	32.59	0.00503989
ENSMUSP00000127346	FAPPEDPEPWSGVR		1583.75				0.00426	0.0719746					28.32	0.0203179
ENSMUSP00000127346	WVQKNIAYFGGNR	K4(ICPL)	1657.82	0.888489	-;-;1		0.000514	0.00504491					13.63	0.793325
ENSMUSP00000127346	GSFVHVKDTKSGVHAFLGIPFAKPPVGLLR	K7(ICPL:13C(6)); K10(ICPL:13C(6)); K23(ICPL:13C(6))	3507.92	0.82561	-;-;1		0	0.000268581					14.18	0.551909
ENSMUSP00000127276	LTVVDTPGYGDAINCR	C15(Carbamidomethyl)	1750.84				0	1.27821e-10	106.17	4.3116e-10	64.2	6.72935e-06	84.75	6.19686e-08
ENSMUSP00000127276	TMLITHMQDLQEVTQDLHYENFR		2862.33				0	5.57038e-08			39.96	0.00187721
ENSMUSP00000127276	TVQIEASTVEIEER		1603.82				0	0.0001576					20.02	0.186141
ENSMUSP00000127250	VTGEEWLVR		1088.57				0	2.11304e-05	50.22	0.000131659			19.97	0.15104
ENSMUSP00000127250	HYCIVANPVSR	C3(Carbamidomethyl)	1315.66				0.000265	0.00160974			12.61	0.984157	37.18	0.00343609
ENSMUSP00000127250	VPHNAAVQVYDYR		1531.76				0	6.73138e-06	18.17	0.301762			39.8	0.00202619
ENSMUSP00000127198	IILLAEGR		884.556				0.000521	0.0106987	32.5	0.00095598			39.6	0.000186401
ENSMUSP00000127198	RIILLAEGR		1040.66				0.000182	0.00165516	31.02	0.00154182	31.78	0.0012943	30.51	0.00173394
ENSMUSP00000127198	ESILDGLKR	K8(ICPL)	1135.61	0.906877	2;-;2	4.35357	0.000182	0.00492629	27.93	0.0193277			33.98	0.00629913
ENSMUSP00000127198	ESILDGLKR	K8(ICPL:13C(6))	1141.63	0.779179	-;2;-		0.000182	0.00221908	28.92	0.0134004	24.21	0.0371729	25.75	0.0282037
ENSMUSP00000127198	EMYSASKPLKGAR	K7(ICPL); K10(ICPL)	1647.8	0.926295	2;1;2	8.83173	0	3.64264e-06	48.59	0.00022483	18.71	0.219375	40.72	0.00138098
ENSMUSP00000127198	EMYSASKPLKGAR	K7(ICPL:13C(6)); K10(ICPL:13C(6))	1659.83	1.00568	-;1;1		0	2.61695e-05	41.56	0.00143487	11.2	1.47923	13.73	0.849404
ENSMUSP00000127198	MSDKLPYKVADIGLAAWGR	M1(Oxidation); K8(ICPL)	2212.12				0	9.74844e-08	61.56	2.17849e-05	49.29	0.000352104	31.25	0.0224218
ENSMUSP00000127198	YWLKNGR	K4(ICPL:13C(6))	1047.55				0.005087	0.102392			13.4	0.683347
ENSMUSP00000127198	KALDIAENEMPGLMR	K1(ICPL)	1792.87	0.923887	-;1;1		0	8.22145e-08			29.56	0.0230731	64.99	6.79872e-06
ENSMUSP00000127198	KALDIAENEMPGLMR	K1(ICPL:13C(6))	1798.89	0.92685	-;1;-		5.3e-05	8.61801e-05			34.36	0.00835478
ENSMUSP00000127186	TEHINIHQLR		1260.68				0	1.33685e-05	27.8	0.0300385
ENSMUSP00000127176;ENSMUSP00000067708;ENSMUSP00000066068	KTFTAWCNSHLR	K1(ICPL); C7(Carbamidomethyl)	1625.76				0	1.76437e-07	65.58	3.84605e-06			58.47	1.96993e-05
ENSMUSP00000127176;ENSMUSP00000067708;ENSMUSP00000066068	KTFTAWCNSHLR	K1(ICPL:13C(6)); C7(Carbamidomethyl)	1631.78				0	6.63651e-08	59.7	1.84837e-05	66.19	4.1355e-06	82.86	9.10988e-08
ENSMUSP00000127176;ENSMUSP00000067708	ASFNHFDR		993.454				0.003519	0.0735143			14.43	0.142429
ENSMUSP00000127176;ENSMUSP00000066068	LDHLAEKFR	K7(ICPL)	1233.64				0	4.42995e-05	34.09	0.00586863	17.21	0.286112	36.03	0.00375437
ENSMUSP00000127176;ENSMUSP00000066068	LDHLAEKFR	K7(ICPL:13C(6))	1239.66				0	0.000161763	37.97	0.00264118	40.68	0.00144934	42.47	0.000968269
ENSMUSP00000127176;ENSMUSP00000066068	VGWEQLLTTIAR		1386.77				0	8.2698e-06	65.53	3.03689e-06	65.86	2.81468e-06	70.94	9.22158e-07
ENSMUSP00000127176;ENSMUSP00000066068	TINEVENQILTR		1429.77				0	5.23553e-07	50.86	0.000137409	47.15	0.000308404	48.78	0.000221827
ENSMUSP00000127176;ENSMUSP00000066068	LSNRPAFMPSEGR		1461.73				0	7.69651e-05	19.77	0.147614	26.09	0.0344451	27.52	0.0263746
ENSMUSP00000127176;ENSMUSP00000066068	LSNRPAFMPSEGR	M8(Oxidation)	1477.72				0	0.000223645	17.13	0.270131	20.53	0.124359	30.59	0.0124398
ENSMUSP00000127176;ENSMUSP00000066068	ELPPDQAEYCIAR	C10(Carbamidomethyl)	1561.73				0	4.34531e-07	69.14	1.30432e-06	59.59	1.14846e-05	83.9	4.21639e-08
ENSMUSP00000127176	DAKGISQEQMNEFR	K3(ICPL:13C(6))	1763.81	1.10971	2;-;1	5.99441	0	4.99151e-08	51.86	5.47368e-05			39.92	0.000819966
ENSMUSP00000127176	ISIEMHGTLEDQLSHLR		1979				0	6.04984e-09	55.45	7.0135e-05	14.54	0.859565	42.65	0.00132825
ENSMUSP00000127176	QKASIHEAWTDGKEAMLR	K2(ICPL:13C(6)); K13(ICPL:13C(6))	2293.12	1.31067	1;-;-		0	6.25882e-05	38.06	0.00404074	37.88	0.00409768
ENSMUSP00000127176	TEKLLETIDQLYLEYAKR	K3(ICPL); K17(ICPL)	2436.25	1.58373	-;1;-		0	5.96662e-08	18.51	0.430538	42.9	0.00154884
ENSMUSP00000127176	TEKLLETIDQLYLEYAKR	K3(ICPL:13C(6)); K17(ICPL:13C(6))	2448.28	1.78267	1;-;-		0	6.05446e-08	37.54	0.00471329
ENSMUSP00000127176	KQFGAQANVIGPWIQTKMEEIGR	K1(ICPL); K17(ICPL)	2811.4	1.07752	-;-;1		0	2.81926e-08	30.53	0.0276156			30.2	0.0304643
ENSMUSP00000127176	KQFGAQANVIGPWIQTKMEEIGR	K1(ICPL:13C(6)); K17(ICPL:13C(6))	2823.45	0.979262	-;1;-		0	3.05509e-10	51.52	0.000203304	33.1	0.014473	20.98	0.233014
ENSMUSP00000127176	LHKPPKVQEKCQLEINFNTLQTKLR	K3(ICPL); K6(ICPL); K10(ICPL); C11(Carbamidomethyl); K23(ICPL)	3482.79				0	0.000172016	15.89	0.926187			23.88	0.146515
ENSMUSP00000127176	LHKPPKVQEKCQLEINFNTLQTKLR	K3(ICPL); K6(ICPL); K10(ICPL); C11(Carbamidomethyl); K23(ICPL:13C(6))	3488.79				0.003603	0.0827963	16.76	0.765432
ENSMUSP00000127176	ETADTDTADQVMASFKILAGDKNYITEDELR	K16(ICPL:13C(6)); K22(ICPL:13C(6))	3682.73				0.000182	0.000947211	13.45	1.44142	12.42	1.72412
ENSMUSP00000127176	HRPELIDYGKLR	K10(ICPL:13C(6))	1607.87	1.00893	-;1;1		5.3e-05	0.000249293			34.65	0.00497013	20.58	0.125998
ENSMUSP00000127176	LHKPPKVQEKCQLEINFNTLQTKLR	K3(ICPL:13C(6)); K6(ICPL:13C(6)); K10(ICPL:13C(6)); C11(Carbamidomethyl); K23(ICPL:13C(6))	3506.87	1.20973	-;1;1		0	1.20932e-06			36.45	0.0061938	34.76	0.00932404
ENSMUSP00000127141	SSNTYTLTDVR		1256.61				0	1.61105e-05	36.04	0.0029493	29.53	0.0139287	59.09	1.46123e-05
ENSMUSP00000127141	SSNTYTLTDVRR		1412.71				5.3e-05	0.000687389	24.42	0.0672222	38.76	0.00252121	30.25	0.0180788
ENSMUSP00000127141	SSTKKSVQYDDVPEYKDR	K4(ICPL:13C(6)); K5(ICPL:13C(6)); K16(ICPL:13C(6))	2478.17	0.819642	1;1;1	4.06069	0	8.82291e-06	11.36	1.62678	32.12	0.011999	25.06	0.0605065
ENSMUSP00000127141	LDVPQNLMFGKWKYEKPDGSPVFIAFR	K11(ICPL:13C(6)); K13(ICPL:13C(6)); K16(ICPL:13C(6))	3515.78	0.926531	1;-;-		0.000128	0.000588014	14.94	1.29373
ENSMUSP00000126823;ENSMUSP00000135492	IFDIR		663.382				0.001453	0.0273353	19.62	0.0660321	23.78	0.025337	23.51	0.0269622
ENSMUSP00000126823	ELPGHTGYLSCCR	C11(Carbamidomethyl); C12(Carbamidomethyl)	1549.69				0	0.000145007	45.8	0.00014861	43.73	0.000233004	57.76	9.46343e-06
ENSMUSP00000126514	VKEKTVQQHAGETDPVTTMR	K2(ICPL); K4(ICPL)	2465.19				0	6.22268e-07	29.26	0.0251976	19.63	0.229764
ENSMUSP00000126514	VKEKTVQQHAGETDPVTTMR	K2(ICPL:13C(6)); K4(ICPL:13C(6))	2477.23	1.04025	4;4;3	5.07556	0	1.58799e-11	56.95	5.90372e-05	76.27	6.99882e-07	64.43	1.0565e-05
ENSMUSP00000126514	VKEKTVQQHAGETDPVTTMR	K2(ICPL); K4(ICPL); M19(Oxidation)	2481.18	1.48435	1;-;-		0	5.13053e-08	36.74	0.00458625			16.43	0.492559
ENSMUSP00000126514	VKEKTVQQHAGETDPVTTMR	K2(ICPL:13C(6)); K4(ICPL:13C(6)); M19(Oxidation)	2493.22	1.25228	-;2;1		0	1.23583e-05	29.06	0.033028	31.97	0.0168045	27.03	0.0530058
ENSMUSP00000126514	LPPDTKVYCGHEYTVNNLKFAR	K6(ICPL:13C(6)); C9(Carbamidomethyl); K19(ICPL:13C(6))	2844.4	1.29973	2;-;-		0	3.1284e-07	38.82	0.00454021
ENSMUSP00000126448;ENSMUSP00000021652;ENSMUSP00000021649	SCWDEPLSIAVR	C2(Carbamidomethyl)	1432.69				0	3.82026e-08	76.22	3.03252e-07	59.8	1.28273e-05	74.25	4.60401e-07
ENSMUSP00000126448;ENSMUSP00000021652	SVLRDEKGALFR	K7(ICPL:13C(6))	1501.82				0.000128	0.000743044	17.67	0.265907	19.78	0.15569	30.31	0.0144787
ENSMUSP00000126448;ENSMUSP00000021652	YRADSHGELDLAR		1502.74				0	2.59843e-06	45.44	0.000451499	36.53	0.00351283	42	0.000936972
ENSMUSP00000126448;ENSMUSP00000021649	HFLAPGVR		896.51				0.004969	0.0924133			19.61	0.101738	18.53	0.130462
ENSMUSP00000126448	NQVKMTKDGLKDVVDALQSPLVDKKSFIPVER	K4(ICPL); K7(ICPL); K24(ICPL); K25(ICPL)	4018.07				0.000182	0.00146906	16.01	1.01623
ENSMUSP00000126448	TPALGGSFSGLEPMGLLWAMEPDRPFWR		3118.53				0	3.41299e-05					33.8	0.0153408
ENSMUSP00000126197	SLNNQFASFIDKVR		1638.86				0	4.64903e-05	43.63	0.000932048	18.51	0.322727	35.67	0.00558299
ENSMUSP00000126011	GAVQFVTQYQHSSGQR		1792.87				0	2.42309e-09	71.11	1.58377e-06	12.57	1.18694	88.54	2.97412e-08
ENSMUSP00000126011	HLLQAPVDDAQEILHSR		1942.01				0	2.82294e-08	54.57	7.40177e-05	49.07	0.000273155	56.72	4.66062e-05
ENSMUSP00000126011	GTKDLSAKQLQEMLGLSKVPVTQATR	K3(ICPL:13C(6)); K8(ICPL:13C(6)); K18(ICPL:13C(6))	3132.67	1.36769	1;-;-		0.000182	0.00386831	12.43	1.46299
ENSMUSP00000126011	SWHDIEKDNAKYVKKGTKHFEALANR	K7(ICPL:13C(6)); K11(ICPL:13C(6)); K14(ICPL:13C(6)); K15(ICPL:13C(6)); K18(ICPL:13C(6))	3640.78	1.73079	1;-;-		0	2.64525e-06	19.36	0.433962
ENSMUSP00000126011	AVLNPLCQVDYR	C7(Carbamidomethyl)	1447.74				0	9.55181e-05					30.17	0.014328
ENSMUSP00000125870	GAKKTGIYTSDR	K3(ICPL:13C(6)); K4(ICPL:13C(6))	1518.77	0.734687	-;1;-		0.000323	0.00673481			23.95	0.0813488
ENSMUSP00000125492	SWLYR		724.377				0.004634	0.112161	24.34	0.0392057	25.04	0.0333695
ENSMUSP00000125492	FSVDVFEETR		1228.58				0	1.02176e-07	44.64	0.000453496	76.22	3.08028e-07	70.4	1.20385e-06
ENSMUSP00000125492	DFLIPVAWYEDR		1523.75				0.000608	0.0130725	13.03	0.846153	13.5	0.786163
ENSMUSP00000125492	WGVADKTFRPPYYHR	K6(ICPL:13C(6))	2004	1.14416	2;1;1	13.7344	5.3e-05	0.000541721	20.91	0.18125	18.2	0.342822	19.54	0.255142
ENSMUSP00000125492	GYILEVYGVHFELPDLGPIGANGLANPR		2981.55				0	1.48039e-05	25.39	0.0901892
ENSMUSP00000125492	CPGSLPKGQNNPQVCPYNLYAEQLSGSAFTCPR	C1(Carbamidomethyl); K7(ICPL:13C(6)); C15(Carbamidomethyl); C31(Carbamidomethyl)	3821.75	1.39569	1;1;-	4.98631	0	1.76881e-12	89.4	2.64649e-08	52.05	0.000166849
ENSMUSP00000125492	ILPSVSHKPFESIDQGHVTHNWDEVGPDPNQLR	K8(ICPL:13C(6))	3859.89	1.16777	3;2;-	8.06228	0	1.32497e-08	46.1	0.00102607	20.95	0.330651
ENSMUSP00000125492	MAELKYISGFGNECASEDPR	M1(Oxidation); C14(Carbamidomethyl)	2290.01				0	3.03928e-07					61.01	6.81551e-06
ENSMUSP00000125472	YPMEHGVVR		1087.53				0	7.72749e-05	28.9	0.0144284	48.38	0.000227255	38.65	0.00137823
ENSMUSP00000125340	MNIPFR		777.407				0.000357	0.00834798			45.62	0.000285124
ENSMUSP00000125164	VTMWVFEEDIGGR	M3(Oxidation)	1554.73				0	4.28779e-05	47.26	0.000187932			19.3	0.11044
ENSMUSP00000125164	MAGKKVCIVGSGNWGSAIAKIVGSNAGR	M1(Oxidation); K5(ICPL); C7(Carbamidomethyl); K20(ICPL)	3014.51				0	2.36122e-06	41.89	0.00214851	24.81	0.110839	17.8	0.547664
ENSMUSP00000125164	TGKSIEQLEKEMLNGQKLQGPQTAR	K3(ICPL); K10(ICPL); K17(ICPL)	3099.53	1.09101	1;-;-		0	1.00314e-09	71.14	2.99192e-06	23.4	0.177807	34.22	0.0148539
ENSMUSP00000125164	TGKSIEQLEKEMLNGQKLQGPQTAR	K3(ICPL:13C(6)); K10(ICPL:13C(6)); K17(ICPL:13C(6))	3117.59	1.04479	1;3;3	12.8489	0	4.6556e-10	62.88	1.90892e-05	46.74	0.000783794	43.46	0.00169282
ENSMUSP00000125164	ELHSILQHKGLVDKFPLFTAVYKVCYEGQPVGEFIR	K9(ICPL); K14(ICPL); K23(ICPL); C25(Carbamidomethyl)	4533.31	1.14461	1;-;1	11.3541	0	1.41141e-06	59.18	5.36269e-05	18.84	0.641983	51.18	0.000375324
ENSMUSP00000125164	ELHSILQHKGLVDKFPLFTAVYKVCYEGQPVGEFIR	K9(ICPL:13C(6)); K14(ICPL:13C(6)); K23(ICPL:13C(6)); C25(Carbamidomethyl)	4551.36				0	7.16696e-06	36.24	0.0101135	59.93	3.97861e-05	25.24	0.123132
ENSMUSP00000125164	KVAEAFAR	K1(ICPL)	996.526	0.96344	-;-;1		0	0.000153524			25.11	0.0365358	32.07	0.00751252
ENSMUSP00000125164	KVAEAFAR	K1(ICPL:13C(6))	1002.55	0.903524	-;2;-		5.3e-05	0.000457915			33.75	0.00506036	22.11	0.0753592
ENSMUSP00000124898	AHYGHSEYQYAWR		1667.73				0	1.96942e-05	33.22	0.00231069			27.1	0.0103342
ENSMUSP00000124898	IQEQVQQTLAR		1313.72				0	1.57502e-06			49.45	0.000166847	79.07	1.7529e-07
ENSMUSP00000124898	MLTTAGQAAVGSGDAHGDR		1814.85				0	5.23552e-08			39.2	0.00154491	84.59	4.74387e-08
ENSMUSP00000124695	XTAAVSGVLGR	N-Term(ICPL); X1(G)	1092.58				0.007842	0.185752	10.66	1.22409	12.82	0.707847
ENSMUSP00000124695	MLIPYIEHWPR		1454.76				0.000182	0.00165358	36.24	0.0045873	11.65	1.46015	26.8	0.0446065
ENSMUSP00000124695	LNQVLEEEQKLVQLGQAEKR	K10(ICPL); K19(ICPL)	2562.33	0.798702	1;-;1	6.09632	0	1.68796e-07	40	0.003455			11.29	2.58571
ENSMUSP00000124695	LNQVLEEEQKLVQLGQAEKR	K10(ICPL:13C(6)); K19(ICPL:13C(6))	2574.37	0.721892	-;3;1		0	1.51444e-06	29.69	0.0258831	31.61	0.017394	49.99	0.000250075
ENSMUSP00000124695	YTDQSGEEEEDYESEEQLQHR		2601.05				0	1.25826e-09	86.84	2.06524e-09	90.75	8.39402e-10	108.22	1.50304e-11
ENSMUSP00000124695	MLIPYIEHWPR	M1(Oxidation)	1470.76				5.3e-05	0.000469865			26.01	0.0567634
ENSMUSP00000124695	KTDQFLR	K1(ICPL:13C(6))	1018.54	0.863668	-;-;1		0.000395	0.00303166					25.74	0.0418697
ENSMUSP00000124606	GLEALAANHAR		1122.6				0	6.72742e-07	37.41	0.00251449	60.13	1.12094e-05	36.03	0.00340512
ENSMUSP00000124487	LLEVQKR	K6(ICPL:13C(6))	996.593	1.00573	1;-;1	20.6932	0.000608	0.0148299	22.64	0.0266806	23.86	0.0291916	20.99	0.0565273
ENSMUSP00000124487	SRNDQVVTDLR		1302.68				0.000514	0.00568318	15.32	0.43771	26.36	0.0387271	22.63	0.0826823
ENSMUSP00000124487	DVLFPGYTHLQR		1445.75				0	1.36273e-05	38.99	0.00308517	37.42	0.00442873	22.98	0.117567
ENSMUSP00000124487	VLIGTMVDRAEAER		1559.82				0.004963	0.119325	20.43	0.185222
ENSMUSP00000124487	WSHWILSHAVALTR		1676.9				0	2.95535e-08	23.23	0.0762913	61.44	1.1054e-05	54.13	6.04664e-05
ENSMUSP00000124487	HLWNVDVQGSKAYSR	K11(ICPL)	1864.91				0	2.94068e-08	45.89	0.000507535	65.27	5.94333e-06	49.54	0.000210117
ENSMUSP00000124487	HLWNVDVQGSKAYSR	K11(ICPL:13C(6))	1870.93	0.710437	3;1;1	20.3735	0	7.35975e-10	74.69	7.28496e-07	79.96	2.32633e-07	59.52	2.49619e-05
ENSMUSP00000124487	LKELIGEAAGKLHTGR	K2(ICPL); K11(ICPL)	1903.02	0.957354	1;1;3	13.6491	0	3.13252e-07	41.85	0.00121809	21.75	0.13133	38.65	0.0027087
ENSMUSP00000124487	LKELIGEAAGKLHTGR	K2(ICPL:13C(6)); K11(ICPL:13C(6))	1915.06	1.02162	3;2;2	10.1977	0	1.04771e-08	47.07	0.000244438	17.38	0.233083	60.48	1.06548e-05
ENSMUSP00000124487	INVLPLGSGAIAGNPLGVDR		1933.09				0	7.87208e-13	87.55	2.00403e-08	81.81	7.61346e-08	57.01	2.25941e-05
ENSMUSP00000124487	AEAERDVLFPGYTHLQR		2002.02				0	1.17866e-05	43.05	0.00135258	28.75	0.0369385	19.29	0.313832
ENSMUSP00000124487	RLKELIGEAAGKLHTGR	K3(ICPL); K12(ICPL)	2059.12	0.935446	1;-;1	22.3582	0.000216	0.00136113	22.95	0.083907			29.76	0.0175432
ENSMUSP00000124487	RLKELIGEAAGKLHTGR	K3(ICPL:13C(6)); K12(ICPL:13C(6))	2071.16				0	3.27032e-07	16.48	0.195668	33.36	0.00401346
ENSMUSP00000124487	FVGAVDPIMEKFNSSISYDR	K11(ICPL:13C(6))	2386.15	1.07039	2;-;-		0	1.0137e-05	22.6	0.131615
ENSMUSP00000124487	VLIGTMVDR		1003.56				5.3e-05	0.000705192			39.54	0.00127293
ENSMUSP00000124487	INVLPLGSGAIAGNPLGVDRELLR		2444.4				0.001174	0.0244568			12.98	0.276925
ENSMUSP00000124401	GYPTLLLFR		1079.62				5.3e-05	0.0012098	23.43	0.0301871	39.31	0.00077951
ENSMUSP00000124401	GYPTLLWFR		1152.62				0	0.000336859	40.04	0.00134753			40.84	0.00112083
ENSMUSP00000124401	DLDSLHSFVLR		1301.68				0	3.06116e-06	55.95	3.97662e-05	47.68	0.000295152	24.56	0.0615903
ENSMUSP00000124401	DGKKVDQYKGKR	K3(ICPL:13C(6)); K4(ICPL:13C(6)); K9(ICPL:13C(6)); K11(ICPL:13C(6))	1865.95				0	1.11152e-05	42.89	0.0010872	40.01	0.0020802	36.63	0.00463872
ENSMUSP00000124401	GYPTLKFFKPGQEAVKYQGPR	K6(ICPL); K9(ICPL); K16(ICPL)	2726.36				0	1.5615e-05	18.77	0.495118	25.34	0.107463	11.22	2.6768
ENSMUSP00000124401	GYPTLKFFKPGQEAVKYQGPR	K6(ICPL:13C(6)); K9(ICPL:13C(6)); K16(ICPL:13C(6))	2744.41	0.953722	2;3;1	9.5397	0	1.42907e-06	36.61	0.00760681	42.26	0.00205922	31.83	0.0221777
ENSMUSP00000124401	LQPTWNDLGDKYNSMEDAKVYVAKVDCTADSDVCSAQGVR	K11(ICPL:13C(6)); K19(ICPL:13C(6)); K24(ICPL:13C(6)); C27(Carbamidomethyl); C34(Carbamidomethyl)	4839.22				8.9e-05	0.000273186	22.7	0.0990824	21.23	0.0896493
ENSMUSP00000124401	NVCSKYSVR	C3(Carbamidomethyl); K5(ICPL:13C(6))	1223.59				0.003849	0.0816933			10.63	0.942815
ENSMUSP00000124401	DGKKVDQYKGKR	K3(ICPL); K4(ICPL); K9(ICPL); K11(ICPL)	1841.87				0	1.50436e-05			29.11	0.0198231
ENSMUSP00000124239	GTPHSHQPQHSDHDASHSGMLPR		2516.12				0	1.37748e-08	27.72	0.0220603	53.69	4.14736e-05	50.03	9.28564e-05
ENSMUSP00000124174	SSTGRPIAFVR		1190.66				0.000182	0.00168336	29.69	0.0149285
ENSMUSP00000124174	EHFAQFGHVR		1227.6				0	5.95307e-06	40.15	0.000922579	31.26	0.00650907	27.78	0.0161723
ENSMUSP00000124174	MAASAIKGLSALR	M1(Oxidation)	1304.73				0.001093	0.0236586	18.63	0.161764	24.47	0.0405505
ENSMUSP00000124174	CTVPFDKETGFHR	C1(Carbamidomethyl); K7(ICPL:13C(6))	1704.79	1.00393	1;1;1	18.6006	0	5.73524e-05	23.77	0.0426055	10.63	0.869293	12.9	0.51799
ENSMUSP00000124174	RCTVPFDKETGFHR	C2(Carbamidomethyl); K8(ICPL:13C(6))	1860.89				0.000182	0.00407389	15.97	0.527359
ENSMUSP00000124147	KMCLFAGFQR	K1(ICPL); C3(Carbamidomethyl)	1362.64	1.04843	1;-;-		0	1.53837e-06	52.83	6.54099e-05
ENSMUSP00000124147	KMCLFAGFQR	K1(ICPL:13C(6)); C3(Carbamidomethyl)	1368.66	1.31939	1;1;1	15.5776	0	1.19014e-06	51.13	9.01957e-05	17.5	0.20717	21.84	0.0762651
ENSMUSP00000124147	NFILDQTNVSAAAQR		1647.85				0	3.05036e-09	92.85	1.11283e-08	89.97	2.1498e-08	86.47	4.8917e-08
ENSMUSP00000124147	LSDKGLKADLMDR	K4(ICPL); K7(ICPL)	1671.82	0.637127	1;-;-		0	2.34571e-07	36.4	0.00358521			24.31	0.0570848
ENSMUSP00000124147	LSDKGLKADLMDR	K4(ICPL:13C(6)); K7(ICPL:13C(6))	1683.86	1.39738	1;-;-		0	4.87109e-05	33.7	0.00804102	17.82	0.314699
ENSMUSP00000124147	APQCLGKFIEIAAR	C4(Carbamidomethyl); K7(ICPL:13C(6))	1684.89	1.02186	1;2;-	13.1981	0	2.52805e-08	53.26	8.85118e-05	52.2	0.000106954	64.59	6.16877e-06
ENSMUSP00000124147	HLYTKDIDIHEVR	K5(ICPL:13C(6))	1749.9	1.47088	2;-;1	31.9506	0	1.87484e-08	62.03	1.44121e-05	59.54	2.57366e-05	53.18	0.000110593
ENSMUSP00000124147	GYFEYIEENKYSR	K10(ICPL)	1802.8	0.660073	1;-;1	31.5059	0	0.000136262	44.62	0.000207086			45.9	0.000154224
ENSMUSP00000124147	GYFEYIEENKYSR	K10(ICPL:13C(6))	1808.82	0.782053	1;1;-	8.76895	0	0.000152725	37.22	0.001726	25.34	0.0248553	18.7	0.11736
ENSMUSP00000124147	KAVVVCPKDEDYKQR	K1(ICPL); C6(Carbamidomethyl); K8(ICPL); K13(ICPL)	2150.01	1.07357	1;1;3	33.4839	0	2.2567e-08	49.96	0.000174601	24.21	0.0650525	45.67	0.000468863
ENSMUSP00000124147	KAVVVCPKDEDYKQR	K1(ICPL:13C(6)); C6(Carbamidomethyl); K8(ICPL:13C(6)); K13(ICPL:13C(6))	2168.07	0.881396	2;-;1	16.8564	0	2.25751e-08	48.77	0.000336494	70.56	2.25469e-06	27.68	0.0446994
ENSMUSP00000124147	QGQQQAGGDGKTEQKGGDKKR	K11(ICPL:13C(6)); K15(ICPL:13C(6)); K19(ICPL:13C(6)); K20(ICPL:13C(6))	2645.27	0.642173	-;1;1		0	2.30238e-07			34.26	0.00965555	17.9	0.423292
ENSMUSP00000124147	MSSSPVNVKKLKVSELKEELKKR	N-Term(ICPL); M1(Oxidation); K12(ICPL); K17(ICPL); K21(ICPL); K22(ICPL)	3198.64				5.3e-05	0.000615155			19.2	0.495333
ENSMUSP00000124147	APQCLGKFIEIAAR	C4(Carbamidomethyl); K7(ICPL)	1678.87	0.851127	-;-;1		0.000306	0.0021311					15.27	0.564617
ENSMUSP00000124147	HLYTKDIDIHEVR	K5(ICPL)	1743.88	0.736495	-;-;2		0	3.36451e-08					63.28	1.07136e-05
ENSMUSP00000124147	LSASSLTMESFAFLWAGGR		2031				0.000216	0.00120889					26.93	0.0351803
ENSMUSP00000124073	SEKEMAAEAEALR	K3(ICPL:13C(6))	1545.73	0.851926	1;1;-	53.0541	0	2.65563e-06	51.37	9.48295e-05	25.82	0.0342982	10.98	0.989513
ENSMUSP00000124073	DLHPDEVADLFQVTQR		1882.93				0.000182	0.00265746	21.26	0.144023
ENSMUSP00000124073	KPVVPGHVLVCPLRPVER	K1(ICPL:13C(6)); C11(Carbamidomethyl)	2163.23	0.969608	1;1;1	51.8484	0.000105	0.00149497	15.83	0.16326	16.7	0.120795	14.75	0.189255
ENSMUSP00000124073	FRDLHPDEVADLFQVTQR		2186.1				0	1.02486e-07	46.97	0.000489214
ENSMUSP00000124073	NDNIYDELQKHDREEEDSPAFWR	K10(ICPL:13C(6))	3017.33	1.32272	1;-;-		0	1.84899e-06	33.96	0.00303352
ENSMUSP00000124073	SEKEMAAEAEALR	K3(ICPL)	1539.71	0.692506	-;-;1		5.9e-05	0.000365616					29.01	0.0118695
ENSMUSP00000123944	RFEQAQHMFR		1349.65				0.009733	0.228983	10.16	1.59514
ENSMUSP00000123944	LSQPPEQLDAHPR		1487.76				0.000182	0.00122566	29.69	0.0196003
ENSMUSP00000123914	HITIFSPEGR		1156.61				0	4.76903e-05	39.48	0.00164007	43.75	0.000613568	33.9	0.00592738
ENSMUSP00000123721	FLDDFEDCPSMYQR	C8(Carbamidomethyl)	1822.74				0	3.94636e-10	87.29	2.05302e-09	54.94	3.5269e-06	62.13	6.42968e-07
ENSMUSP00000123721	GQPNHKVMLDHSHGLAAFR	K6(ICPL:13C(6))	2226.11	0.888846	1;1;1	13.2093	0	1.27901e-07	16	0.700816	29.69	0.0282996	21.88	0.174483
ENSMUSP00000123398;ENSMUSP00000102381	LLLNNDNLLR		1197.69				0	2.39123e-06	62.43	3.60032e-06	48.87	9.53427e-05	67.17	1.41022e-06
ENSMUSP00000123398	ICFKFDHLR	C2(Carbamidomethyl); K4(ICPL:13C(6))	1346.68	0.959179	-;1;-		5.3e-05	0.00054452			10.4	1.74194
ENSMUSP00000123398	KEATDPRPYEAENAIESWR	K1(ICPL:13C(6))	2373.12	0.739265	-;1;-		5.3e-05	0.000708553			12.21	1.01298
ENSMUSP00000123393	LFHVQGTESHNTR		1525.75				5.3e-05	0.000992994			28.5	0.02366	20.13	0.166928
ENSMUSP00000123336	FMAPDIEAAHR		1257.61				0.000128	0.000682919	20.65	0.0985838			18.8	0.116007
ENSMUSP00000123336	SHSSGVGKPLSPER	K8(ICPL:13C(6))	1548.78	1.0631	-;2;2		0	8.90907e-06	22.64	0.098555	50.72	0.000160973	55.01	5.85253e-05
ENSMUSP00000123336	SLLDSDHHPSEIAESHR		1929.91				0	2.75707e-08	41.17	0.0011152	44.07	0.000560191	44.57	0.000501016
ENSMUSP00000123336	GETISGGNFHGEYPAKALDYLAIGVHELAAISER	K16(ICPL)	3690.81				0.000289	0.00599035	11.8	2.69563
ENSMUSP00000123336	GETISGGNFHGEYPAKALDYLAIGVHELAAISER	K16(ICPL:13C(6))	3696.83	0.962876	1;-;-		0	1.34853e-06	23.43	0.203593	10.35	4.06393
ENSMUSP00000123336	LLLDQKVWEVAAPYIEKYR	K6(ICPL:13C(6)); K17(ICPL:13C(6))	2556.38	1.31357	-;2;-		5.3e-05	0.000271706			19.69	0.246481
ENSMUSP00000123336	SHSSGVGKPLSPER	K8(ICPL)	1542.76				0.000116	0.000740167					18.42	0.226611
ENSMUSP00000123336	YKIKLTSIAEKKVQQSR	K2(ICPL); K4(ICPL); K11(ICPL); K12(ICPL)	2440.27				0	1.49945e-05					19.7	0.297347
ENSMUSP00000123325	SEHLIQTDTVNLHR		1662.86				0	2.08686e-08	57.85	3.49446e-05
ENSMUSP00000123325	ILATEDRSEHLIQTDTVNLHR		2461.27				0	3.08628e-05	15.62	0.81836
ENSMUSP00000123190	HGLLVPNNTTDQELQHIR		2085.08				0	3.08725e-10	56.07	5.67261e-05	59.12	2.81049e-05	50.42	0.000216969
ENSMUSP00000123089	GVGHEEKGAAPTGAIETTMKR	K7(ICPL:13C(6)); K20(ICPL:13C(6))	2362.16				0	1.6287e-10	46.44	0.000581085
ENSMUSP00000123069	GGTWFAGFGR		1055.5				0.000182	0.00245983	33.44	0.00326086
ENSMUSP00000123069	HFRPELEDR		1198.6				0	9.42773e-05	43.24	0.000602287	43.39	0.000531445	36.93	0.00257516
ENSMUSP00000123069	GEFYNEASNLQVAIR		1710.84				0	1.51646e-08	64.08	6.23391e-06	79.52	1.80373e-07	68.47	2.31128e-06
ENSMUSP00000123069	HDPHKLVEGCLVGGR	K5(ICPL:13C(6)); C10(Carbamidomethyl)	1784.9	0.971657	1;2;1	7.5599	0	4.49814e-09	45.52	0.000575114	60.6	1.84209e-05	54.29	7.80161e-05
ENSMUSP00000123069	LIEFYKHESCGQCTPCR	K6(ICPL:13C(6)); C10(Carbamidomethyl); C13(Carbamidomethyl); C16(Carbamidomethyl)	2296.01	0.971007	2;2;-	6.70697	0	2.08571e-09	39.19	0.000578417	65.02	1.68405e-06	44.88	0.000152791
ENSMUSP00000123069	GAGAYICGEETALIESIEGKQGKPR	C7(Carbamidomethyl); K20(ICPL:13C(6)); K23(ICPL:13C(6))	2856.4				0	5.13021e-07	49.29	0.000373301	28.5	0.0445656	26.92	0.0640192
ENSMUSP00000123069	LKPPFPADVGVFGCPTTVANVETVAVSPTICR	K2(ICPL:13C(6)); C14(Carbamidomethyl); C31(Carbamidomethyl)	3510.79	1.05092	1;-;-		0.00042	0.00952544	11.77	2.86067
ENSMUSP00000123069	IFTNLYGR		983.531				0.000195	0.00241866			38.32	0.00152384
ENSMUSP00000123069	STDIVKAIAR	K6(ICPL:13C(6))	1184.67				0	4.23159e-05			33.99	0.00430947	14.35	0.343409
ENSMUSP00000123069	STDIVKAIAR	K6(ICPL)	1178.65	0.982481	-;-;2		0.000429	0.00380425					24.77	0.0411782
ENSMUSP00000123069	HDPHKLVEGCLVGGR	K5(ICPL); C10(Carbamidomethyl)	1778.88				0	1.32306e-05					37.37	0.00415935
ENSMUSP00000123069	LIEFYKHESCGQCTPCR	K6(ICPL); C10(Carbamidomethyl); C13(Carbamidomethyl); C16(Carbamidomethyl)	2289.98	0.910108	-;-;1		0	5.45232e-09					52.62	1.8325e-05
ENSMUSP00000122963	LETVGSVFSR		1094.58				0.001215	0.0278049	28.35	0.0144024
ENSMUSP00000122963	LQASSEGHEPQEDDDLAQR		2124.94				0	3.37987e-06	22.36	0.0540111	23.48	0.0401627	34.46	0.00325868
ENSMUSP00000122945	KTRPDGNCFYR	K1(ICPL:13C(6)); C8(Carbamidomethyl)	1524.71	1.26116	1;1;1	10.868	0	1.9794e-05	17.98	0.124192	30.71	0.00662361	30.93	0.00617535
ENSMUSP00000122945	IQQEIAVQNPLVSER		1723.93				0	1.52009e-06	60.36	1.8409e-05	33.96	0.00765411	60.76	1.5572e-05
ENSMUSP00000122945	KTRPDGNCFYR	K1(ICPL); C8(Carbamidomethyl)	1518.69				0.000559	0.00578978					10.71	0.59018
ENSMUSP00000122851	MDLAGDSDGWVSLAELR		1834.87				0	4.94627e-08	26.31	0.0417482	18.31	0.264889	41.14	0.00142674
ENSMUSP00000122851	VHHGTPLSEAPHDDAHGNFQYDHEAFLGR		3254.48				0	6.09259e-12	41.01	0.00100648	45.18	0.000386821	38.78	0.00185408
ENSMUSP00000122851	DSVSAAWHTYDTDRDGR		1951.85				5.3e-05	0.000329266			17.82	0.0660785	22.82	0.0208958
ENSMUSP00000122583	HMLHSLVR		992.546				0.000182	0.00149584	29.24	0.0142949	23.62	0.0558346	20.92	0.0962824
ENSMUSP00000122527	QASGGPVDIGPEYQQDLDR		2044.95				0	3.39363e-10	75.7	3.9431e-07	53.39	6.84922e-05	97.1	3.01251e-09
ENSMUSP00000122471	GEIAGPPDTPYEGGR		1515.71				0	1.43751e-05	27.89	0.0144674	36.22	0.00208933	25.14	0.0267922
ENSMUSP00000122471	LWAHVYAGAPVSSPEYTKKIENLCAMGFDR	K18(ICPL:13C(6)); K19(ICPL:13C(6)); C24(Carbamidomethyl)	3632.76				0.000128	0.000502932	12.98	2.02407
ENSMUSP00000122336	KWREEQKKR	K1(ICPL:13C(6)); K7(ICPL:13C(6)); K8(ICPL:13C(6))	1620.85	0.87617	1;1;1	19.6002	8.9e-05	0.000323525	18.75	0.28004	14.96	0.636712	14.86	0.653176
ENSMUSP00000122336	LQELDAASKVTEQEWR	K9(ICPL)	2007.98	1.22975	-;1;-		0	8.26369e-08			42.02	0.0015356
ENSMUSP00000122095	XLHAHDPVFR	X1(A)	1162.61				8.9e-05	0.00041855	15.42	0.396168
ENSMUSP00000122087	TRGEGYARPNDGAMVEVALEGYHKDR	K24(ICPL:13C(6))	3002.43	1.36547	1;-;-		0	7.18218e-09	57.29	4.67528e-05
ENSMUSP00000122087	MEKGEHSIVYLKPSYAFGSVGKER	K3(ICPL:13C(6)); K12(ICPL:13C(6)); K22(ICPL:13C(6))	3045.51	1.87793	1;-;-		0	3.88289e-06	22.14	0.225743
ENSMUSP00000121918	YFVLR		697.403				0.006903	0.132576					26.39	0.0129732
ENSMUSP00000121663	LTMQVSSLQR		1162.62				0	9.50769e-05	29.91	0.0154672			18.65	0.206052
ENSMUSP00000121663	SGVNSELVKR	K9(ICPL:13C(6))	1199.65	1.62568	1;1;1	17.9589	5.3e-05	0.000124269	49.91	0.000339462	36.14	0.00829382	27.85	0.0567644
ENSMUSP00000121643	VHLDIQVGEHANNYPEIAAKDKLTELQLR	K20(ICPL:13C(6)); K22(ICPL:13C(6))	3536.83				0	5.12889e-07	40.41	0.0031756
ENSMUSP00000121643	MALFAGGKLR	K8(ICPL:13C(6))	1174.65	1.24974	-;1;-		0	6.18992e-06			52.91	7.13796e-05
ENSMUSP00000121557	DSDSILETLQR		1276.64				0.000182	0.00107696	36.93	0.00351803
ENSMUSP00000121557	KPVGKYHIQVCTTTPCMLR	K1(ICPL); K5(ICPL); C11(Carbamidomethyl); C16(Carbamidomethyl)	2499.21	1.0479	-;1;1		0	1.92392e-10	46.07	0.000574676	49.38	0.000273368	48.68	0.000332699
ENSMUSP00000121557	DTPENNPDTPFDFTPENYKR	K19(ICPL:13C(6))	2508.11	0.885322	2;1;1	2.25421	0	2.40679e-08	55.71	2.04086e-05	77.1	1.55988e-07	20.36	0.0708746
ENSMUSP00000121557	KPVGKYHIQVCTTTPCMLR	K1(ICPL:13C(6)); K5(ICPL:13C(6)); C11(Carbamidomethyl); C16(Carbamidomethyl)	2511.25	1.02089	1;-;-		0	3.7924e-08	46.97	0.000615787	40.55	0.00267839	44.29	0.00115255
ENSMUSP00000121557	IEAIVKNYPEGHQAAAVLPVLDLAQR	K6(ICPL:13C(6))	2926.59	0.809737	1;2;1	8.09317	0	1.39405e-06	13.14	1.08219	34.73	0.00637689	43.66	0.000858901
ENSMUSP00000121557	IEAIVKNYPEGHQAAAVLPVLDLAQR	K6(ICPL)	2920.57				0	3.20925e-05			18.57	0.394052	19.53	0.301417
ENSMUSP00000121549	EASVTPSNLWGGQGLLGVSIR		2141.14				0	5.52728e-07	34.92	0.00856804	55.49	7.6413e-05	81.21	2.01696e-07
ENSMUSP00000121530	KKLEQLYTR	K1(ICPL:13C(6)); K2(ICPL:13C(6))	1400.77	0.989086	1;-;-		0.000182	0.001818	28.98	0.0163783			15.7	0.32433
ENSMUSP00000121509	AHQVTDESLESTRR		1628.8				0.001489	0.030153			27.43	0.0300894
ENSMUSP00000121358	AEQPHQHAMYYLR		1643.77				0	3.86747e-05	13.65	0.489774	23.02	0.0578706	25.26	0.032168
ENSMUSP00000121358	YREVQLPDR		1175.62				0.000353	0.00250618					26.8	0.0368761
ENSMUSP00000121240	IQEYEKQLEKMR	K6(ICPL); K10(ICPL)	1804.87	0.864603	2;1;1	4.49388	0	1.26433e-06	56.34	3.97188e-05	67.69	2.91069e-06	60.13	1.66928e-05
ENSMUSP00000121240	IQEYEKQLEKMR	K6(ICPL:13C(6)); K10(ICPL:13C(6))	1816.91	0.818256	2;4;2	5.556	0	1.40251e-06	47.78	0.000383467	71.17	1.75682e-06	56.14	5.3022e-05
ENSMUSP00000121240	IQEYEKQLEKMR	K6(ICPL); K10(ICPL); M11(Oxidation)	1820.86	0.960622	1;-;1	13.087	0	5.73554e-08	74.92	4.87992e-07	54.24	5.27385e-05	46.1	0.000358388
ENSMUSP00000121240	IQEYEKQLEKMR	K6(ICPL:13C(6)); K10(ICPL:13C(6)); M11(Oxidation)	1832.9	1.11062	1;2;1	8.2253	0	1.10778e-06	67.27	4.16249e-06	57.47	3.9841e-05	78.11	3.43819e-07
ENSMUSP00000121240	LASLSEKPPAIDWAYYR	K7(ICPL)	2085.05	0.882717	-;-;1		0	1.43399e-07	29.82	0.0343444	42.15	0.00200233	63.09	1.61509e-05
ENSMUSP00000121240	LASLSEKPPAIDWAYYR	K7(ICPL:13C(6))	2091.07	0.888195	3;4;1	3.29224	0	1.01651e-09	63.68	1.2985e-05	73.01	1.5051e-06	60.88	2.55999e-05
ENSMUSP00000121240	KLALKTIDWVSFVEVMPQNQKAIGNALKSWNETFHAR	K1(ICPL); K5(ICPL); K21(ICPL); K28(ICPL)	4690.37	0.960696	1;1;-	10.9995	0	3.57288e-06	27.74	0.0891817	11.89	3.77284
ENSMUSP00000121240	KLALKTIDWVSFVEVMPQNQKAIGNALKSWNETFHAR	K1(ICPL:13C(6)); K5(ICPL:13C(6)); K21(ICPL:13C(6)); K28(ICPL:13C(6))	4714.42	1.4017	-;1;-		0	6.21063e-05			42.35	0.00275917	26.1	0.114144
ENSMUSP00000121201	QFVTATDVVR		1135.61				0	0.00012302	47.02	0.000253227	22.61	0.0720984
ENSMUSP00000121201	NWMNSLGVNPR		1287.63				8.9e-05	0.00043407	23.29	0.0677435
ENSMUSP00000121201	AECMLQQAER	C3(Carbamidomethyl)	1235.55				5.3e-05	0.000110923			40.95	0.000309358
ENSMUSP00000121201	NEALIALLR		1012.61				5.9e-05	0.000648147					31.63	0.00271392
ENSMUSP00000121201	GNPKLNLAFIANLFNKYPALHKPENQDIDWGALEGETR	K4(ICPL:13C(6)); K16(ICPL:13C(6)); K22(ICPL:13C(6))	4627.32				0.000353	0.00250439					32.25	0.0321062
ENSMUSP00000121182	IYSYVVSRPQPR		1464.79				0.007642	0.180099	17.19	0.241596
ENSMUSP00000121182	RKEEEVQQQKLAEER	K2(ICPL); K10(ICPL)	2110.03				0	4.62077e-06	27.44	0.0393058
ENSMUSP00000121182	RKEEEVQQQKLAEER	K2(ICPL:13C(6)); K10(ICPL:13C(6))	2122.07	1.06913	2;2;1	2.68319	0	1.04726e-06	40.97	0.00216755	43.07	0.00133404	42.39	0.00156304
ENSMUSP00000121182	AHPVFYQGTYSQALNDAKR	K18(ICPL:13C(6))	2277.11	1.09557	-;1;-		0	3.28405e-07			27.32	0.0443921
ENSMUSP00000121108	NEKIAVHCTVR	K3(ICPL); C8(Carbamidomethyl)	1431.72				0	4.43748e-06	45.99	0.000524936	50.13	0.000195558
ENSMUSP00000121108	NEKIAVHCTVR	K3(ICPL:13C(6)); C8(Carbamidomethyl)	1437.74	1.0159	2;4;4	13.2516	0	2.22636e-07	57.09	3.11717e-05	74.47	5.64491e-07	61.49	1.22402e-05
ENSMUSP00000121108	RNEKIAVHCTVR	K4(ICPL); C9(Carbamidomethyl)	1587.82	1.22979	-;1;-		0	0.000326084	21.79	0.100326	36.9	0.0031749	25.31	0.0475524
ENSMUSP00000121108	RNEKIAVHCTVR	K4(ICPL:13C(6)); C9(Carbamidomethyl)	1593.84	1.18245	5;6;5	1.9181	0	5.46298e-05	45.71	0.000365207	57.56	2.56067e-05	43.41	0.000656693
ENSMUSP00000121108	KLCLNICVGESGDR	K1(ICPL); C3(Carbamidomethyl); C7(Carbamidomethyl)	1725.8				0	1.06896e-08	66.92	2.05268e-06	23.95	0.0420839	83.64	4.34676e-08
ENSMUSP00000121108	KLCLNICVGESGDR	K1(ICPL:13C(6)); C3(Carbamidomethyl); C7(Carbamidomethyl)	1731.83				0	1.34458e-05	13.28	0.657852			35.22	0.00488487
ENSMUSP00000121108	GAKAEEILEKGLKVR	K3(ICPL); K10(ICPL); K13(ICPL)	1956.04	1.01114	1;4;2	6.01285	0	3.10981e-08	51.52	0.000163136	47.11	0.000450351	39.38	0.00265871
ENSMUSP00000121108	GAKAEEILEKGLKVR	K3(ICPL:13C(6)); K10(ICPL:13C(6)); K13(ICPL:13C(6))	1974.1	1.10669	1;1;1	4.46465	0	4.71705e-08	48.78	0.000178124	54.82	4.43325e-05	63.38	5.99253e-06
ENSMUSP00000121108	AAKVLEQLTGQTPVFSKAR	K3(ICPL); K17(ICPL)	2254.2	1.03312	1;3;1	1.15671	0	1.04609e-07	35.61	0.00649877	45.62	0.000653865	77.97	3.74234e-07
ENSMUSP00000121108	AAKVLEQLTGQTPVFSKAR	K3(ICPL:13C(6)); K17(ICPL:13C(6))	2266.24	1.01805	1;1;2	3.67077	0	4.81359e-07	29.83	0.0181466	69.2	2.00177e-06	78.1	2.58652e-07
ENSMUSP00000121108	ISKEEAMR	K3(ICPL:13C(6))	1074.54	0.980057	-;1;-		0.000153	0.00180801			22.49	0.0752456
ENSMUSP00000121108	KLCLNICVGESGDRLTR	K1(ICPL:13C(6)); C3(Carbamidomethyl); C7(Carbamidomethyl)	2102.06	1.5144	-;1;-		0.000153	0.00206279			34.89	0.00835175
ENSMUSP00000121019	IPDEIIDMVR		1200.63				0	2.69304e-06	66.92	3.27209e-06	58.57	2.23782e-05	45.9	0.000413834
ENSMUSP00000121019	MPECYIR	C4(Carbamidomethyl)	968.432				0.000195	0.00231708			41.89	0.000313864	20.04	0.0480553
ENSMUSP00000120871	LKKKALVKR	K2(ICPL:13C(6)); K3(ICPL:13C(6)); K4(ICPL:13C(6)); K8(ICPL:13C(6))	1527.94	0.889819	1;1;-	2.52563	0	1.77571e-05	24.1	0.00622472	15.29	0.0473282
ENSMUSP00000120871	FSTEQLPKFKAKHPDAKLSELVR	K8(ICPL); K10(ICPL); K12(ICPL); K17(ICPL)	3089.57	0.895864	1;-;-		0	1.36111e-05	11.96	2.57265	21.41	0.28694
ENSMUSP00000120871	KIAALWR	K1(ICPL:13C(6))	968.577	0.935886	-;-;1		0.005759	0.109902					21.94	0.0316669
ENSMUSP00000120871	FSTEQLPKFKAKHPDAKLSELVR	K8(ICPL:13C(6)); K10(ICPL:13C(6)); K12(ICPL:13C(6)); K17(ICPL:13C(6))	3113.65	0.787342	-;1;-		0	2.91742e-07			29.22	0.0375777
ENSMUSP00000120859	VGIQHSLVNQPAR		1418.79				0	1.9168e-05	29.88	0.0115138	32.74	0.00635869
ENSMUSP00000120645	LKQQSELQSQVR	K2(ICPL)	1548.81	1.07712	2;1;-	25.8404	0	1.27081e-07	71.92	1.13434e-06	65.28	5.20328e-06	72.53	9.71738e-07
ENSMUSP00000120645	LKQQSELQSQVR	K2(ICPL:13C(6))	1554.83	0.479901	-;1;3		0	1.15717e-09	68.74	2.35909e-06	96.03	4.44038e-09	91.83	1.21059e-08
ENSMUSP00000120645	IKKTQDQISNIKYHEEFEKSR	K2(ICPL); K3(ICPL); K12(ICPL); K19(ICPL)	3041.47	0.588123	2;-;2	53.3436	0	1.16332e-07	42.39	0.00179374	53.68	0.000131564	26.56	0.0674545
ENSMUSP00000120645	IKKTQDQISNIKYHEEFEKSR	K2(ICPL:13C(6)); K3(ICPL:13C(6)); K12(ICPL:13C(6)); K19(ICPL:13C(6))	3065.54	0.816589	3;4;3	21.1347	0	5.51485e-11	69.52	4.37252e-06	43.84	0.00159023	65.2	1.14758e-05
ENSMUSP00000120633	FDGKTPATLGPNTR	K4(ICPL:13C(6))	1585.81	0.978819	1;1;2	12.9298	0	1.57162e-06	31.76	0.011269	20.26	0.162476	30.2	0.0161394
ENSMUSP00000120633	FDGKTPATLGPNTR	K4(ICPL)	1579.79				0.000265	0.00145434					20.49	0.137569
ENSMUSP00000120452	TMLQNCLPR	C6(Carbamidomethyl)	1132.56				0.000514	0.00499488	17.63	0.214867	27.86	0.0220152	26.24	0.0306612
ENSMUSP00000120452	TMLQNCLPR	M2(Oxidation); C6(Carbamidomethyl)	1148.55				8.9e-05	0.000250443	26.75	0.0240938			37.01	0.00220965
ENSMUSP00000120452	TPEELQHSLR		1209.62				0	9.29579e-06	47.26	0.000296932	38.16	0.00265033	45.86	0.00040988
ENSMUSP00000120452	KAQDFHWLTR	K1(ICPL)	1406.7	0.933715	1;1;3	8.94807	0	0.000108882	43.89	0.000790098	55.65	5.25481e-05	56.01	4.7992e-05
ENSMUSP00000120452	KAQDFHWLTR	K1(ICPL:13C(6))	1412.72	1.04558	4;3;2	13.3934	0	0.000253758	44.84	0.00058565	49.51	0.000203178	47.19	0.000346638
ENSMUSP00000120452	ALQSADVIVLFGAR		1459.83				0	1.94236e-05	32.26	0.00466519	36.17	0.00199276	15.95	0.195655
ENSMUSP00000120452	LNWILHFGLPPR		1462.83				5.3e-05	0.000816	11.2	0.857193	31.01	0.00951002	18.02	0.17827
ENSMUSP00000120452	DSFIVSEGANTMDIGR		1711.8				0	4.51212e-08	64.88	3.85228e-06	20.51	0.112484	19.86	0.129612
ENSMUSP00000120452	DSFIVSEGANTMDIGR	M12(Oxidation)	1727.79				0	1.62386e-09	93.21	4.48878e-09	72.05	6.20616e-07	40.03	0.00098815
ENSMUSP00000120452	NQEAMGAFQEFPQVEACR	C17(Carbamidomethyl)	2111.93				0	7.50709e-13	100.75	4.16491e-10	25.18	0.0159279	16.07	0.12235
ENSMUSP00000120452	NQEAMGAFQEFPQVEACR	M5(Oxidation); C17(Carbamidomethyl)	2127.92				0	1.46369e-13	102.73	2.53334e-10	91	3.45533e-09	80.49	4.2432e-08
ENSMUSP00000120452	DAKQPLLIIGKGAAYSHAEDSIR	K3(ICPL); K11(ICPL)	2663.36	1.0785	2;1;1	13.8405	0	1.59193e-07	41.26	0.00258118	44.54	0.0012287	50.42	0.000320915
ENSMUSP00000120452	DAKQPLLIIGKGAAYSHAEDSIR	K3(ICPL:13C(6)); K11(ICPL:13C(6))	2675.4	1.00812	1;3;1	5.70448	0	1.12915e-06	38.16	0.00479656	36.03	0.00759604	38.18	0.00463007
ENSMUSP00000120452	KLVEQCSLPFLPTPMGKGVVPDNHPNCVGAAR	K1(ICPL); C6(Carbamidomethyl); K17(ICPL); C27(Carbamidomethyl)	3698.8	1.41181	2;1;2	8.98216	0	1.02127e-05	21.5	0.274683	15.95	0.988438	25.46	0.110507
ENSMUSP00000120452	KLVEQCSLPFLPTPMGKGVVPDNHPNCVGAAR	K1(ICPL:13C(6)); C6(Carbamidomethyl); K17(ICPL:13C(6)); C27(Carbamidomethyl)	3710.84				0	1.7958e-14	93.09	2.28763e-08	15.15	1.40068	86.72	1.04279e-07
ENSMUSP00000120452	EKMKSNEAISKELASQKSLPMNYYTVFYHVQEQLPR	K2(ICPL); K4(ICPL); K11(ICPL); K17(ICPL)	4707.25	1.12145	1;1;-	0.0337437	5.3e-05	0.000997804	13.29	2.16357	11	3.79689	18.27	0.586064
ENSMUSP00000120452	LDAGSFGTMGVGLGFAIAAALVAKDR	K24(ICPL:13C(6))	2619.37	1.23057	-;1;-		0	2.81961e-06			27.39	0.0465093
ENSMUSP00000120452	EKMKSNEAISKELASQKSLPMNYYTVFYHVQEQLPR	K2(ICPL:13C(6)); K4(ICPL:13C(6)); K11(ICPL:13C(6)); K17(ICPL:13C(6))	4731.3				5.3e-05	0.000886764			28.41	0.0713847	18.69	0.762569
ENSMUSP00000120336	AAADADVSLHNFSAR		1544.74				0	4.63572e-07	47.47	0.000241732			54.61	4.28965e-05
ENSMUSP00000119879	MGGTLPKYR	K7(ICPL:13C(6))	1133.59	0.800127	2;4;1	55.0862	5.3e-05	0.000694067	28.93	0.01644	28.31	0.018889	13.86	0.448153
ENSMUSP00000119879	MGGTLPKYR	K7(ICPL)	1127.56	0.323218	-;-;1		0.001174	0.0248328			19.29	0.107162	17.65	0.157189
ENSMUSP00000119824	QPFFQKR	K6(ICPL:13C(6))	1061.56	5.13638	1;-;-		0.001276	0.0314161	23.1	0.061957
ENSMUSP00000119824	VEVTEFEDIKSGYR	K10(ICPL)	1776.85	0.254628	1;1;-	54.6366	0	2.66247e-07	57.34	2.01107e-05	64.55	3.77058e-06
ENSMUSP00000119824	VEVTEFEDIKSGYR	K10(ICPL:13C(6))	1782.86	2.06585	1;1;1	10.5305	0	3.87932e-07	36.81	0.003158	34.56	0.00533666	10.62	1.34813
ENSMUSP00000119794;ENSMUSP00000026328	QITINDLPVGR		1225.69				0	8.02732e-05	47.27	0.000239062	26.95	0.0257342	25.14	0.03904
ENSMUSP00000119794	GLFIIDDKGILR	K8(ICPL)	1464.82	0.949017	3;-;2	2.76444	0	2.41392e-07	61.57	7.76739e-06	55.36	2.86706e-05	58.78	1.43029e-05
ENSMUSP00000119794	GLFIIDDKGILR	K8(ICPL:13C(6))	1470.84	1.00147	3;6;3	4.08061	0	8.62151e-06	54.77	4.03446e-05	61.61	7.62715e-06	62.05	7.54719e-06
ENSMUSP00000119794	TIAQDYGVLKADEGISFR	K10(ICPL)	2088.04	0.999412	3;1;1	2.7941	0	3.36902e-15	123.67	9.62162e-12	98.05	3.48602e-09	102.28	1.3251e-09
ENSMUSP00000119794	TIAQDYGVLKADEGISFR	K10(ICPL:13C(6))	2094.08	1.04982	5;6;7	4.01184	0	1.51349e-10	110.57	2.07411e-10	103.65	1.02917e-09	123.52	1.09824e-11
ENSMUSP00000119603	FDAGELITQR		1149.59				0	8.64295e-07	63.98	5.53923e-06	67.66	2.37383e-06	70.81	1.14934e-06
ENSMUSP00000119603	ILFRPVASQLPR		1396.84				0	1.5638e-06	40.26	0.000291986	45.41	7.04963e-05	43.08	0.00012055
ENSMUSP00000119603	IYTSIGEDYDER		1460.65				0	1.55671e-08	81.43	4.46058e-08	69.82	6.09756e-07	56.3	1.45342e-05
ENSMUSP00000119603	KLEAAEDIAYQLSR	K1(ICPL)	1711.87	0.901515	1;-;-		0	1.04379e-10	70.17	1.67321e-06	75.2	5.34531e-07	48.06	0.000289182
ENSMUSP00000119603	KLEAAEDIAYQLSR	K1(ICPL:13C(6))	1717.89	1.04478	-;2;2		0	2.39655e-08	33.82	0.0103946	83.83	1.05984e-07	84.41	9.29153e-08
ENSMUSP00000119603	VLPSITTEILKSVVAR	K11(ICPL)	1831.07	0.887212	1;-;-		0	4.52787e-09	51.72	2.7592e-05
ENSMUSP00000119603	VLPSITTEILKSVVAR	K11(ICPL:13C(6))	1837.09	0.896477	1;-;1	3.03723	0	3.12953e-06	17.23	0.0283852			48.16	2.44411e-05
ENSMUSP00000119603	NVPVITGSKDLQNVNITLR	K9(ICPL)	2186.19	0.939377	1;1;1	4.40789	0	2.88667e-08	70.94	1.49398e-06	95.62	5.0582e-09	67.03	3.81444e-06
ENSMUSP00000119603	NVPVITGSKDLQNVNITLR	K9(ICPL:13C(6))	2192.21	0.947272	-;2;1		0	2.28086e-09	49.26	0.00018498	86.4	3.57375e-08	88.11	2.4106e-08
ENSMUSP00000119603	MAAKVFESIGKFGLALAVAGGVVNSALYNVDAGHR	M1(Oxidation); K11(ICPL)	3653.89				0	2.91477e-13	53.55	0.000176407			86.6	9.21048e-08
ENSMUSP00000119603	AATFGLILDDVSLTHLTFGKEFTEAVEAKQVAQQEAER	K20(ICPL); K29(ICPL)	4373.19				0	3.72885e-05	19.72	0.562096
ENSMUSP00000119603	AATFGLILDDVSLTHLTFGKEFTEAVEAKQVAQQEAER	K20(ICPL:13C(6)); K29(ICPL:13C(6))	4385.22	1.31709	-;-;1		0	3.80818e-05	14.33	2.1124	15.42	1.56601	21.98	0.332148
ENSMUSP00000119603	GVQDIVVGEGTHFLIPWVQKPIIFDCR	K20(ICPL); C26(Carbamidomethyl)	3228.67				0.001563	0.02066			14.34	1.39705	12.31	2.19427
ENSMUSP00000119603	GVQDIVVGEGTHFLIPWVQKPIIFDCR	K20(ICPL:13C(6)); C26(Carbamidomethyl)	3234.69	1.1374	-;1;1		0	1.47959e-07			36.93	0.00674205	18.97	0.465228
ENSMUSP00000119535	KGWLSLHTGNLDGEDHAAER	K1(ICPL:13C(6))	2317.11	0.676616	1;-;-		0	5.81046e-08	40.54	0.00202225	12.23	1.33147
ENSMUSP00000119535	VAKGNKPVSYEEAHAPHYIAHR	K3(ICPL); K6(ICPL)	2684.31	1.03217	1;-;-		0	4.47347e-05	19.41	0.365991
ENSMUSP00000119535	VAKGNKPVSYEEAHAPHYIAHR	K3(ICPL:13C(6)); K6(ICPL:13C(6))	2696.35	0.904185	-;1;1		0	6.5144e-07			22.71	0.175473	11.76	2.08377
ENSMUSP00000119503	NVQGVNYVSPVR		1331.71				0	6.61576e-06	48.43	0.000214606	46.28	0.00035208	35.58	0.00413658
ENSMUSP00000119474	LDAAGGLQSLR		1100.61				0	1.72145e-07	64.14	5.30033e-06	54.42	4.96939e-05	48.05	0.000215428
ENSMUSP00000119474	GALWGSEDISR		1190.58				0.000182	0.00170987	19.06	0.194939			13.93	0.635184
ENSMUSP00000119474	VTMATHPDGFR		1231.59				0	1.17929e-05	62	8.07625e-06	47.83	0.000190363	46.01	0.000320782
ENSMUSP00000119474	LEGPLAAAHSSGPR		1362.71				0	8.25614e-07	44.78	0.000547225	57.33	2.99582e-05	62.3	9.62759e-06
ENSMUSP00000119474	NSNTMAAAALAAPSLGFDR		1877.91				0	0.000106825	36.15	0.00488962			43.45	0.000937601
ENSMUSP00000119474	NSNTMAAAALAAPSLGFDR	M5(Oxidation)	1893.91				0	8.00434e-07	34.53	0.00539127			49.43	0.000174458
ENSMUSP00000119474	MAGSVPPALQLQDLTALEER		2139.11				0	5.56383e-06	59.08	3.67076e-05
ENSMUSP00000119474	VTMATHPDGFRLEGPLAAAHSSGPR		2575.28				0	4.53868e-06	34.5	0.0113895	23.15	0.151062	27.21	0.0592186
ENSMUSP00000119474	HPDLVVEVAHPKIIHESGAQILR	K12(ICPL:13C(6))	2669.46	0.866788	1;-;1	12.622	0	1.238e-07	46.1	0.000359615			26.88	0.0307674
ENSMUSP00000119474	TVLYEGPVR		1033.57				0.000429	0.00382149					26.05	0.0336465
ENSMUSP00000119275	IVLDFR		762.451				0.000975	0.0207777			29.2	0.0022843
ENSMUSP00000119172	NILEKHSLDASQGTATGPR	K5(ICPL:13C(6))	2106.07				0	2.62565e-06			20.81	0.205803
ENSMUSP00000119139	KVDIIADAAYSIFKR	K1(ICPL); K14(ICPL)	1920	1.05642	1;-;1	1.50945	0	7.95021e-09	49.46	0.000248562			15.28	0.649298
ENSMUSP00000119139	KVDIIADAAYSIFKR	K1(ICPL:13C(6)); K14(ICPL:13C(6))	1932.04	1.24391	-;-;1		0.000429	0.00333254					20.78	0.110717
ENSMUSP00000119080	HLSHPEPEQQHVIQR		1834.93				5.3e-05	8.70259e-05			27.44	0.0465179
ENSMUSP00000118963	DLLHPSLEEEKKKHKKKR	K11(ICPL); K12(ICPL); K13(ICPL); K15(ICPL); K16(ICPL); K17(ICPL)	2873.42	0.984373	1;1;1	13.563	0	3.95487e-08	41.86	0.00213734	26.54	0.0773041	30.88	0.027233
ENSMUSP00000118737	IALGGVCDQSDIR	C7(Carbamidomethyl)	1403.69				0	1.10607e-06	44.31	0.00062089	51.98	0.000106173	47.11	0.000320984
ENSMUSP00000118737	AVAVKVAEGQHKEAKLDR	K5(ICPL); K12(ICPL); K15(ICPL)	2264.16	1.11519	1;-;-		0	2.74186e-05	19.2	0.292751
ENSMUSP00000118737	AVAVKVAEGQHKEAKLDR	K5(ICPL:13C(6)); K12(ICPL:13C(6)); K15(ICPL:13C(6))	2282.22				0	7.77292e-07	19.07	0.242185
ENSMUSP00000118555	YHQIGSGKCEIKVAQPKEVYR	K8(ICPL); C9(Carbamidomethyl); K12(ICPL); K17(ICPL)	2805.35				0	7.1004e-07	28.95	0.0367406
ENSMUSP00000118555	YHQIGSGKCEIKVAQPKEVYR	K8(ICPL:13C(6)); C9(Carbamidomethyl); K12(ICPL:13C(6)); K17(ICPL:13C(6))	2823.42	1.07728	2;2;1	16.3045	0	1.99967e-10	47.66	0.000554465	38.65	0.00435984	44.68	0.00110122
ENSMUSP00000118555	GFGFVLFKDAASVDKVLELKEHKLDGKLIDPKR	K8(ICPL:13C(6)); K15(ICPL:13C(6)); K20(ICPL:13C(6)); K23(ICPL:13C(6)); K27(ICPL:13C(6)); K32(ICPL:13C(6))	4379.34				0	2.71243e-05	10.12	2.04277
ENSMUSP00000118555	FGEVVDCTIKTDPVTGR	C7(Carbamidomethyl); K10(ICPL:13C(6))	2004.98				5.3e-05	0.00121945			28	0.0361356
ENSMUSP00000118531	GKGYYDTYLKR	K2(ICPL:13C(6)); K10(ICPL:13C(6))	1585.78	0.880289	1;-;-		0	8.2763e-05	20.86	0.11608	32.07	0.0087853	39.3	0.0017506
ENSMUSP00000118462	SQFLSNTIIKALKNKFILR	K10(ICPL); K13(ICPL); K15(ICPL)	2549.4	1.26946	-;-;1		0	9.94482e-05	18.78	0.198651			11.25	0.986111
ENSMUSP00000118462	GGGKFSTANPVYVGNVAWAHILAAR	K4(ICPL:13C(6))	2667.4	1.25755	1;1;1	23.979	0	5.91861e-08	51.56	0.000194109	68.14	4.15881e-06	51.96	0.000172572
ENSMUSP00000118462	SQFLSNTIIKALKNKFILR	K10(ICPL:13C(6)); K13(ICPL:13C(6)); K15(ICPL:13C(6))	2567.46	1.25917	-;2;-		0	6.90833e-08			32.68	0.00321009
ENSMUSP00000118462	GGGKFSTANPVYVGNVAWAHILAAR	K4(ICPL)	2661.37				0	5.25649e-07			39.04	0.00378581	31.52	0.0209294
ENSMUSP00000118453	ASFSQGPINSANR		1348.66				0	6.28317e-05			50.63	0.000113311	70.25	1.22728e-06
ENSMUSP00000118179	TLDLPIYVTR		1190.68				0.000182	0.00507928	10.05	0.939125
ENSMUSP00000118179	GHYNNVSCAVFHPR	C8(Carbamidomethyl)	1657.76				0	6.57617e-06	22.59	0.0534283	12.16	0.532118	30.74	0.00788518
ENSMUSP00000118127	VPNPHPHPHFTR		1435.73				0	1.43771e-05					39.63	0.0017314
ENSMUSP00000117980	VLGHKFR	K5(ICPL:13C(6))	967.557	1.00803	1;-;2	17.4272	0.000429	0.00436743	18.03	0.102309			24.04	0.0209062
ENSMUSP00000117980	YGFNSHGLSAVEHR		1573.75				0	4.9389e-07	43.18	0.000581816	39.04	0.00139707	26.61	0.02401
ENSMUSP00000117980	VISLGLLPR		967.629				0.000608	0.0144427			32.5	0.000561009
ENSMUSP00000117980	ATFQDSNMLEVR		1410.67				0.000195	0.00212837			13.16	0.485474
ENSMUSP00000117980	VLGHKFR	K5(ICPL)	961.537				0.004533	0.0840736					16.29	0.175048
ENSMUSP00000117980	LLSKVLQER	K4(ICPL:13C(6))	1196.71	0.794552	-;-;1		0.001454	0.0174099					11.19	0.486609
ENSMUSP00000117971	MLQIPNR		871.482				0.007244	0.167362	20.14	0.0890816
ENSMUSP00000117971	AKMAVIEYKGNYLPPLPLPHR	K2(ICPL:13C(6)); K9(ICPL:13C(6))	2629.42				0.000319	0.00774772	21.27	0.13772
ENSMUSP00000117933	LGALAIR		713.467				0.000289	0.00647609	21.83	0.0278862	23.35	0.0196512	36.14	0.00103369
ENSMUSP00000117855	ELYDAGVKR	K8(ICPL:13C(6))	1161.6	0.72516	-;1;-		0.000241	0.00382741			15.72	0.359009	22.57	0.0738722
ENSMUSP00000117855	SEVDMLKIR	K7(ICPL:13C(6))	1201.63	0.85339	-;1;1		0	0.000223214			33.26	0.0067269	46.09	0.000351833
ENSMUSP00000117855	LYDSMKGKGTR	K6(ICPL:13C(6)); K8(ICPL:13C(6))	1477.73	0.830425	-;1;1		0.000763	0.0086098			20.32	0.1347	16.95	0.28358
ENSMUSP00000117855	SVCHLQKVFER	C3(Carbamidomethyl); K7(ICPL:13C(6))	1513.77	0.944679	-;2;-		0	3.96162e-05			32.9	0.00838528
ENSMUSP00000117855	RAEDGSVIDYELIDQDAR		2064.98				0	1.32415e-08			72.18	1.08961e-06	24.04	0.0729746
ENSMUSP00000117855	ELYDAGVKR	K8(ICPL)	1155.58				0.001563	0.0202456					26.81	0.0214703
ENSMUSP00000117855	SVCHLQKVFER	C3(Carbamidomethyl); K7(ICPL)	1507.75	1.32106	-;-;1		0	4.64636e-05					36.78	0.0033688
ENSMUSP00000117800	MKVFVTGPLPAEGR	N-Term(ICPL); K2(ICPL)	1711.86				0	1.52139e-06	53.02	8.83026e-05	14.73	0.597308	52.79	9.75762e-05
ENSMUSP00000117800	MKVFVTGPLPAEGR	N-Term(ICPL:13C(6)); K2(ICPL:13C(6))	1723.91				0	1.25295e-05	57.86	3.22453e-05	39.38	0.00246262	31.76	0.0130694
ENSMUSP00000117800	MKVFVTGPLPAEGR	N-Term(ICPL); M1(Oxidation); K2(ICPL)	1727.85				0.000128	0.000645366	22.94	0.0868953
ENSMUSP00000117800	MKVFVTGPLPAEGR	N-Term(ICPL:13C(6)); M1(Oxidation); K2(ICPL:13C(6))	1739.9				0	6.97244e-05	25.77	0.0460839
ENSMUSP00000117643;ENSMUSP00000122095	SITHSPKVQALVR	K7(ICPL:13C(6))	1546.88				0	3.79076e-06	50.51	8.26957e-05	24.54	0.0325193
ENSMUSP00000117643	IGEIVAEMDVPLHCR	C14(Carbamidomethyl)	1738.86				0	1.82307e-08	51.05	0.000140165	62.07	1.2138e-05	50.04	0.000175873
ENSMUSP00000117643	IGEIVAEMDVPLHCR	M8(Oxidation); C14(Carbamidomethyl)	1754.85				0.000289	0.00597274	21.89	0.106779
ENSMUSP00000117643	APSDSGPGTSFLGSDPAWASNLFVPLPVRR		3098.57				0	1.11561e-06	21.56	0.263234			52.19	0.000227085
ENSMUSP00000117575	VAELNPDENCIR	C10(Carbamidomethyl)	1429.67				0	2.73688e-05	27.21	0.0181553	36.89	0.00190319	28.17	0.0145547
ENSMUSP00000117575	VGAENVAIVEPSER		1469.76				0	0.000200408	38.15	0.00268706	39.99	0.0016538	44.02	0.000653859
ENSMUSP00000117575	RVGAENVAIVEPSER		1625.86				0.000182	0.00315124	26.84	0.0416098
ENSMUSP00000117547	RPGAISTGDIAR		1213.66				0	1.67071e-05	42.65	0.000635603	42.59	0.000652707	42.99	0.000595276
ENSMUSP00000117547	WGFKGQPASHGQTKTHR	K4(ICPL:13C(6)); K14(ICPL:13C(6))	2145.06	1.05887	1;-;-		0	9.34021e-05	22.65	0.140973
ENSMUSP00000117497	TRPKEGWKGPR	K4(ICPL); K8(ICPL)	1521.77				0	4.82563e-05	28.84	0.0309563			43.14	0.00116712
ENSMUSP00000117497	TRPKEGWKGPR	K4(ICPL:13C(6)); K8(ICPL:13C(6))	1533.81	1.11193	2;1;3	76.6026	0	3.71231e-07	43.08	0.000806945	23.35	0.0758305	37.25	0.00308918
ENSMUSP00000117497	NIDPKPCTPR	K5(ICPL:13C(6)); C7(Carbamidomethyl)	1308.65	2.82329	-;-;1		0.001528	0.0188925			16.94	0.309522	13.15	0.743205
ENSMUSP00000117464	KYTAAQLHLHWGQR	K1(ICPL:13C(6))	1819.94				8.9e-05	0.000209417	24	0.0997258
ENSMUSP00000117347	KKEAEKEEL	K1(ICPL:13C(6)); K2(ICPL:13C(6)); K6(ICPL:13C(6))	1436.72	1.20275	1;1;-	35.5461	0.000241	0.00376366	16.87	0.290909	20.42	0.132542
ENSMUSP00000117347	IGKLIENKMSDSKKEELQKSLNILTAFR	K3(ICPL); K8(ICPL); K13(ICPL); K14(ICPL); K19(ICPL)	3758.88	1.0008	1;-;1	5.90918	0	6.00116e-05	22.74	0.249559			23.85	0.20131
ENSMUSP00000117347	KKEAEKEEL	K1(ICPL); K2(ICPL); K6(ICPL)	1418.66				0.006198	0.125005			17.01	0.16224
ENSMUSP00000117347	IGKLIENKMSDSKKEELQKSLNILTAFR	K3(ICPL:13C(6)); K8(ICPL:13C(6)); K13(ICPL:13C(6)); K14(ICPL:13C(6)); K19(ICPL:13C(6))	3789.01				0.000306	0.00181446					22.48	0.164397
ENSMUSP00000117009	NPGAPFQIIR		1112.62				8.9e-05	0.000199695	35.82	0.00286691			26.07	0.0270654
ENSMUSP00000117009	ILMAHDIHTKHR	K10(ICPL)	1576.82	0.942374	-;-;1		0	8.28044e-05	34.46	0.0059444	34.07	0.00693383	33.32	0.00803136
ENSMUSP00000117009	ILMAHDIHTKHR	K10(ICPL:13C(6))	1582.84	1.08322	4;4;4	12.6294	0	1.72054e-05	39.11	0.00197004	37.12	0.00323157	46.81	0.000334561
ENSMUSP00000117009	ILQEAGADISKTVMSHLDR	K11(ICPL)	2189.1				0.002416	0.0589803	17.83	0.469726
ENSMUSP00000117009	ILQEAGADISKTVMSHLDR	K11(ICPL:13C(6))	2195.12	1.11589	1;-;-		0	2.26482e-06	28	0.040811	23.99	0.101751	33.66	0.0113013
ENSMUSP00000117009	VLDKILIENPKQWLTFK	K4(ICPL:13C(6)); K11(ICPL:13C(6)); K17(ICPL:13C(6))	2418.33	1.69099	-;1;-		0	4.79741e-06	54.2	4.42921e-05	35.92	0.00291679
ENSMUSP00000117009	KILEATAHAQAQLGCPVIIHPGR	K1(ICPL:13C(6)); C15(Carbamidomethyl)	2591.4	1.8714	1;1;1	12.3966	0	8.69281e-10	36.98	0.00325727	47.97	0.000284864	32.59	0.0104929
ENSMUSP00000117009	VHFLVDEGYEDR		1478.69				0	8.8284e-06			20.86	0.0947506
ENSMUSP00000117009	ILMAHDIHTKHR	M3(Oxidation); K10(ICPL:13C(6))	1598.83	1.02432	-;1;1		0	1.12063e-05			28.22	0.0259136	37.31	0.00319542
ENSMUSP00000117009	RVHFLVDEGYEDR		1634.79				0	3.24523e-05			35.66	0.00445496	25.71	0.0436368
ENSMUSP00000117009	VLDKILIENPKQWLTFK	K4(ICPL); K11(ICPL); K17(ICPL)	2400.28				0.000608	0.0135251			13.75	1.1681
ENSMUSP00000117009	ILMAHDIHTKHR	M3(Oxidation); K10(ICPL)	1592.81				0.000306	0.00199647					29.31	0.0212167
ENSMUSP00000116919	EHINLGCDVDFDIAGPSIR	C7(Carbamidomethyl)	2128.01				0	2.65989e-10	123.93	7.18122e-12	108.01	2.63278e-10	127.07	3.5046e-12
ENSMUSP00000116919	GLKLTFDSSFSPNTGKKNAKIKTGYKR	K3(ICPL:13C(6)); K16(ICPL:13C(6)); K17(ICPL:13C(6)); K20(ICPL:13C(6)); K22(ICPL:13C(6)); K26(ICPL:13C(6))	3652.89	0.637402	1;-;-		0	1.73225e-05	21.8	0.253046	14.28	1.36423
ENSMUSP00000116914	GLKYIHSADIIHR	K3(ICPL:13C(6))	1633.89	1.01558	1;1;-	3.63335	0	7.8825e-06	32.66	0.00951212	15.05	0.551753
ENSMUSP00000116868	NNLIDDAKAR	K8(ICPL:13C(6))	1240.64	0.885264	-;1;-		5.3e-05	0.000713463			25.84	0.0476926
ENSMUSP00000116811	LQEVSAHLVR		1151.65				0	6.89701e-06			44.09	0.000389942
ENSMUSP00000116627	IQDAGLVLADALR		1354.77				0	1.82618e-06	60.13	7.2303e-06
ENSMUSP00000116627	HLETAGILGANIR		1364.76				0	2.43566e-10	48.63	0.000130234	87.77	1.52905e-08	67.04	1.87812e-06
ENSMUSP00000116627	KFLFDLNVDDGLAALGYSKDDIPSLVKGTLPQER	K1(ICPL); K19(ICPL); K27(ICPL)	4050.03	0.690536	1;-;1	50.9895	0	6.27647e-06	35	0.0148785	21.63	0.321204	16.09	1.15514
ENSMUSP00000116627	KFLFDLNVDDGLAALGYSKDDIPSLVKGTLPQER	K1(ICPL:13C(6)); K19(ICPL:13C(6)); K27(ICPL:13C(6))	4068.09	0.954466	-;1;-		0	2.7737e-06			29.06	0.0553777	12.29	2.70902
ENSMUSP00000116610	AHGQDLGTAGSCLR	C12(Carbamidomethyl)	1442.68				0	1.57154e-06			46.98	0.000235525	19.54	0.130628
ENSMUSP00000116610	SAPFIECHGR	C7(Carbamidomethyl)	1173.55				0.000216	0.00102789					28.26	0.00925533
ENSMUSP00000116601	KLALQKNVICDKCEGR	K1(ICPL); K6(ICPL); C10(Carbamidomethyl); K12(ICPL); C13(Carbamidomethyl)	2247.08	0.913474	1;-;-		0	3.48956e-07	26.72	0.0401154
ENSMUSP00000116601	KLALQKNVICDKCEGR	K1(ICPL:13C(6)); K6(ICPL:13C(6)); C10(Carbamidomethyl); K12(ICPL:13C(6)); C13(Carbamidomethyl)	2265.14				0	1.94218e-06	14.57	1.04044
ENSMUSP00000116601	IHQIGPGMVQQIQSVCMECQGHGER	C16(Carbamidomethyl); C19(Carbamidomethyl)	2879.31				0	5.86429e-11	67.67	2.20592e-06	45.7	0.000419879	61.18	1.18503e-05
ENSMUSP00000116601	IHQIGPGMVQQIQSVCMECQGHGER	C16(Carbamidomethyl); M17(Oxidation); C19(Carbamidomethyl)	2895.31				0	1.53241e-05	11.88	0.648634
ENSMUSP00000116601	KLALKYHPDKNPNEGEKFKQISQAYEVLADSKKR	K1(ICPL); K5(ICPL); K10(ICPL); K17(ICPL); K19(ICPL); K32(ICPL); K33(ICPL)	4708.25				0.000386	0.00917562	13.96	1.68551
ENSMUSP00000116601	KLALKYHPDKNPNEGEKFKQISQAYEVLADSKKR	K1(ICPL:13C(6)); K5(ICPL:13C(6)); K10(ICPL:13C(6)); K17(ICPL:13C(6)); K19(ICPL:13C(6)); K32(ICPL:13C(6)); K33(ICPL:13C(6))	4750.41				0	3.70501e-08	33.88	0.0203812
ENSMUSP00000116567	LHPHAMASIR		1132.6				5.3e-05	0.000669869	14.25	0.625769	20.48	0.15445	23.58	0.0706034
ENSMUSP00000116401	ILHGGMIHR		1033.57				0	2.35077e-05	26.24	0.03387	35.88	0.00379592	40.8	0.00118526
ENSMUSP00000116373	FICIYPAYLNNKKTIAEGR	C3(Carbamidomethyl); K12(ICPL:13C(6)); K13(ICPL:13C(6))	2493.28	1.14749	1;1;-	10.454	0	8.38494e-05	23.66	0.125499	14.3	1.06073
ENSMUSP00000116146	MGNTPDSASDNLGFR		1581.7				0	4.21385e-09	88.84	6.59616e-09	46.97	0.000101459	77.47	1.03855e-07
ENSMUSP00000116035	LVIGDHKSTSHFR	K7(ICPL)	1601.82				0	6.79074e-06	49.26	0.000227668
ENSMUSP00000116035	LVIGDHKSTSHFR	K7(ICPL:13C(6))	1607.84	0.999555	1;1;-	14.4543	0	4.85156e-07	60.53	1.84104e-05	58.49	3.02272e-05
ENSMUSP00000115967	VGVTVAQTTMEPHLLEACVR	C18(Carbamidomethyl)	2211.13				0	2.92255e-06	45.03	0.000978268	43.97	0.00127476	35.91	0.00768063
ENSMUSP00000115967	KGKFAEGEATLR	K1(ICPL:13C(6)); K3(ICPL:13C(6))	1528.79				0	1.87739e-05			23.37	0.084227
ENSMUSP00000115967	LGYFSVDPDSHQGQIVFNR		2179.05				0	1.66812e-07			24.49	0.090686	42.5	0.00143959
ENSMUSP00000115755	VVHIIQSR		951.574				0.000153	0.00171923			25.16	0.012344
ENSMUSP00000115729	ANATNKLTVIAEQIQHLQEQAR	K6(ICPL:13C(6))	2587.37	1.29943	-;1;1		0	2.59987e-06			22.82	0.138174	22.19	0.148873
ENSMUSP00000115723	LFTNFHR		934.489				0.000941	0.0200351	23.23	0.0549012			10.69	0.985331
ENSMUSP00000115723	VLLKEYR	N-Term(ICPL:13C(6)); K4(ICPL:13C(6))	1142.64				0.00314	0.0577506			30.66	0.0119403
ENSMUSP00000115700	KPISADAKEVHYKNR	K1(ICPL); K8(ICPL); K13(ICPL)	2071.02				0	1.874e-06	25.96	0.0621107	38.29	0.00363217	25.17	0.0714608
ENSMUSP00000115700	KPISADAKEVHYKNR	K1(ICPL:13C(6)); K8(ICPL:13C(6)); K13(ICPL:13C(6))	2089.08	0.126257	1;-;-		0	7.77567e-06	32.66	0.0113007
ENSMUSP00000115700	YWHDNCFR	C6(Carbamidomethyl)	1197.49				0.000763	0.00864318					20.83	0.0111515
ENSMUSP00000115560	SNFAVGYR		913.452				0.001013	0.0220848			24.5	0.0287399
ENSMUSP00000115547	GEKKNSWFGTSGSQR	K3(ICPL); K4(ICPL)	1878.85				0.000153	0.00185738			21.27	0.064941
ENSMUSP00000115506	VEEFSLPDALNEGQVQVR		2030.02				0	6.41992e-10	78.13	4.12225e-07	59.49	3.04206e-05	63.62	1.1558e-05
ENSMUSP00000115500	MKETIMNQEKLAKLQAQVR	N-Term(ICPL); K2(ICPL); K10(ICPL)	2574.31				0.008699	0.165253			12.59	1.77085
ENSMUSP00000115500	MKETIMNQEKLAKLQAQVR	N-Term(ICPL:13C(6)); K2(ICPL:13C(6)); K10(ICPL:13C(6)); K13(ICPL:13C(6))	2703.4				0	3.12432e-07			35.67	0.00788666	29.7	0.0263594
ENSMUSP00000115495	RPYKAFKSNPIPR	K4(ICPL:13C(6)); K7(ICPL:13C(6))	1795.98	0.75339	1;-;-		4.9e-05	0.00018376	24.86	0.0597656
ENSMUSP00000115419	HQLLKK	K5(ICPL:13C(6)); K6(ICPL:13C(6))	988.576	0.847495	1;1;1	20.4977	0.004223	0.0700856	11.14	0.384565	29.87	0.00814005	27.3	0.0147105
ENSMUSP00000115419	SHYEEGPGKNLPFSVENKWR	K9(ICPL); K18(ICPL)	2584.2	1.19577	1;1;1	5.1667	0	2.98968e-08	35.66	0.00540571	32.87	0.00994102	29.57	0.0212535
ENSMUSP00000115419	SHYEEGPGKNLPFSVENKWR	K9(ICPL:13C(6)); K18(ICPL:13C(6))	2596.24	1.204	-;1;-		0	2.85511e-06	26.67	0.052205	29.02	0.0290729	25.9	0.0579624
ENSMUSP00000115419	HQLLKK	K5(ICPL); K6(ICPL)	976.536	0.710474	-;-;1		0.009902	0.186011					11.93	0.859221
ENSMUSP00000115348	ELAESDFASTFR		1372.64				0	7.06052e-05	36.14	0.00273623
ENSMUSP00000115166	YHYKCKHGYVPKER	K4(ICPL:13C(6)); C5(Carbamidomethyl); K6(ICPL:13C(6)); K12(ICPL:13C(6))	2198.05	1.01618	1;1;-	7.08713	0	1.22797e-05	17.55	0.370922	10.54	1.85888
ENSMUSP00000115166	KLVVSPR	K1(ICPL:13C(6))	909.561	1.05334	-;1;-		0.003164	0.0631055			26.26	0.00520502
ENSMUSP00000115166	VGDLLEFSCHSGHR	C9(Carbamidomethyl)	1613.75				0	1.66066e-06					55.8	2.53821e-05
ENSMUSP00000115104	LTALHPPEKHGGR	K9(ICPL:13C(6))	1523.82				0.000153	0.00194757			30.89	0.0106319
ENSMUSP00000115104	RLTALHPPEKHGGR	K10(ICPL:13C(6))	1679.92	1.44807	-;1;-		5.3e-05	0.000323428			15.96	0.337172
ENSMUSP00000115037	GALSALREEHR		1238.66				0.000289	0.00648995	20.51	0.157389
ENSMUSP00000114906	MYKLGDGVDKDEAKAEVLKNR	K3(ICPL:13C(6)); K10(ICPL:13C(6)); K14(ICPL:13C(6)); K19(ICPL:13C(6))	2823.4				0	6.72641e-06			26.86	0.0660432
ENSMUSP00000114842	IHHDQPVKPLDR	K8(ICPL:13C(6))	1565.83	0.994471	-;-;1		0.000265	0.001647					27.77	0.0331711
ENSMUSP00000114649	HQYQPLSLRR		1297.71				0.000973	0.0206638	17.08	0.190008	16.86	0.204002	15.99	0.242956
ENSMUSP00000114649	GVTIQPLKR	K8(ICPL:13C(6))	1122.67	1.03368	-;1;-		0.000153	0.0018892			26.81	0.00573235
ENSMUSP00000114515;ENSMUSP00000065940	GKMSSYAFFVQTCR	K2(ICPL); C13(Carbamidomethyl)	1786.8				0	1.33906e-10	83.77	3.23214e-08			29.92	0.00825059
ENSMUSP00000114515;ENSMUSP00000065940	GKMSSYAFFVQTCR	K2(ICPL:13C(6)); C13(Carbamidomethyl)	1792.82				0	2.25102e-09	83.86	4.5432e-08	96.87	2.26148e-09	29.82	0.0110486
ENSMUSP00000114515;ENSMUSP00000065940	GKMSSYAFFVQTCR	K2(ICPL); M3(Oxidation); C13(Carbamidomethyl)	1802.8				0	2.78256e-08					67.5	1.05808e-06
ENSMUSP00000114515	WKTMSAKEKGKFEDMAKADKAR	K2(ICPL); K7(ICPL); K9(ICPL); K11(ICPL); K17(ICPL); K20(ICPL)	3186.44	0.934212	3;3;2	3.11835	0	8.56808e-09	59.22	1.3583e-05	51.31	9.42997e-05	49.59	0.000124737
ENSMUSP00000114515	WKTMSAKEKGKFEDMAKADKAR	K2(ICPL:13C(6)); K7(ICPL:13C(6)); K9(ICPL:13C(6)); K11(ICPL:13C(6)); K17(ICPL:13C(6)); K20(ICPL:13C(6))	3222.56	1.00503	-;-;1		0	9.58455e-08	40.07	0.00320296			28.38	0.0454511
ENSMUSP00000114515	EEHKKKHPDASVNFSEFSKKCSER	K4(ICPL); K5(ICPL); K6(ICPL); K19(ICPL); K20(ICPL); C21(Carbamidomethyl)	3429.51	1.04681	1;1;-	5.56613	0	1.08187e-07	47.18	0.000207697	60.56	9.09788e-06	65.08	2.91829e-06
ENSMUSP00000114515	EEHKKKHPDASVNFSEFSKKCSER	K4(ICPL:13C(6)); K5(ICPL:13C(6)); K6(ICPL:13C(6)); K19(ICPL:13C(6)); K20(ICPL:13C(6)); C21(Carbamidomethyl)	3459.6	1.09894	-;-;1		0	0.000354779					10.74	1.98184
ENSMUSP00000114515	GKGDPKKPR	N-Term(ICPL); K2(ICPL); K6(ICPL); K7(ICPL)	1402.66				5.3e-05	0.000492064			47.37	0.000179567
ENSMUSP00000114515	GKGDPKKPR	N-Term(ICPL:13C(6)); K2(ICPL:13C(6)); K6(ICPL:13C(6)); K7(ICPL:13C(6))	1426.75	4.99454	-;-;1		5.3e-05	0.00118635			32.93	0.00916796	29.86	0.0188995
ENSMUSP00000114515	WKTMSAKEKGKFEDMAKADKAR	K2(ICPL:13C(6)); K7(ICPL:13C(6)); K9(ICPL:13C(6)); K11(ICPL:13C(6)); M15(Oxidation); K17(ICPL:13C(6)); K20(ICPL:13C(6))	3238.55	0.92029	-;1;1		0	9.64422e-09			29.27	0.0338941	42.01	0.00178465
ENSMUSP00000114504	RAAAVHLMQ		996.54				0.001724	0.0346635			39.6	0.0011513	22.14	0.0650653
ENSMUSP00000114504	WQTVLPVTQKHTR	K10(ICPL:13C(6))	1704.93	0.952152	1;2;3	28.7037	0	1.04667e-05	12.84	0.844993	34.96	0.00513838	28.9	0.0211273
ENSMUSP00000114504	DHILLFNDAHFLMASLGAR		2141.1				0	5.74171e-06	23.67	0.134015	12.97	1.55688	36.98	0.00637422
ENSMUSP00000114504	VLELLLPIR		1065.7				0	0.000119134			50.12	9.70443e-06	37.39	0.000181958
ENSMUSP00000114504	ACDLWEQILR	C2(Carbamidomethyl)	1303.65				0.000195	0.00216395			45.82	0.000362618
ENSMUSP00000114504	DALKPNSPLTER	K4(ICPL:13C(6))	1451.76	0.890697	-;-;1		0.003897	0.0628754					10	2.06
ENSMUSP00000114438	ILRPWQSSETR		1372.73				5.3e-05	0.0012552	17.57	0.261602	21.9	0.0965253	21.54	0.104868
ENSMUSP00000114438	GKGSVKEGKVGR	K2(ICPL:13C(6)); K6(ICPL:13C(6)); K9(ICPL:13C(6))	1534.82	1.59911	1;-;-		0	3.80329e-06	33.93	0.00568429	41.27	0.00118685	32.91	0.00823808
ENSMUSP00000114438	GKGSVKEGKVGR	K2(ICPL); K6(ICPL); K9(ICPL)	1516.77	0.336468	-;1;-		5.3e-05	0.000664888			15.6	0.476482
ENSMUSP00000114402	FHPGNFGPR		1028.51				0.001617	0.0413565	21.56	0.0740126
ENSMUSP00000114345	ALGQNPTNAEVLR		1382.74				5.3e-05	0.000810416			34.27	0.00613541	44.82	0.000519135
ENSMUSP00000114317	KEKLPQVTR	K1(ICPL:13C(6)); K3(ICPL:13C(6))	1320.74	1.03216	1;-;-		0	8.62384e-05	36.25	0.00201567
ENSMUSP00000114247	LYTQNIDGLER		1321.68				0	4.63271e-05	32.7	0.0108749			17.15	0.384541
ENSMUSP00000114247	LLHDKELLLR	K5(ICPL)	1354.78	1.22062	1;-;-		0.003991	0.0929455	13.65	0.267542
ENSMUSP00000114247	LLHDKELLLR	K5(ICPL:13C(6))	1360.8				0.000319	0.00777609	10.49	0.428787
ENSMUSP00000114247	RKDVVQLGDVVHGVER	K2(ICPL:13C(6))	1917.04	1.00185	1;-;1	5.38555	0	1.61623e-07	44.8	0.000604314			22.8	0.0963022
ENSMUSP00000114219	FTLNPNTTGVQNPHIER		1937.98				5.3e-05	0.000183892	30.78	0.0174223	26.55	0.0465856
ENSMUSP00000114214	ICPKPDDLPFATVVPLKTSYDPGEQIVYSCKPGYVSR	C2(Carbamidomethyl); K4(ICPL:13C(6)); K17(ICPL:13C(6)); C30(Carbamidomethyl); K31(ICPL:13C(6))	4530.24	1.22529	1;1;-	9.13171	0	2.85585e-05	17.7	0.897522	30.74	0.0432631
ENSMUSP00000114214	FTCPLTGMWPINTLR	C3(Carbamidomethyl)	1806.9				5.3e-05	0.000786074			24.41	0.0748032	27.04	0.039144
ENSMUSP00000114214	VCPFAGILENGIVR	C2(Carbamidomethyl)	1544.83				0	0.000331643					11.42	1.69821
ENSMUSP00000114135	QINWTVLYR		1192.65				5.3e-05	8.39434e-05	40.03	0.00146485	40.2	0.00130356	39.72	0.0014559
ENSMUSP00000114135	AITGASLADIMAKR	K13(ICPL:13C(6))	1528.82	0.952431	2;2;1	11.9635	0	2.10513e-10	87.32	3.24368e-08	89.74	1.88982e-08	89.07	2.20506e-08
ENSMUSP00000114135	KHKKGQSEEIQKKR	K1(ICPL); K3(ICPL); K4(ICPL); K12(ICPL); K13(ICPL)	2249.1	1.0331	2;5;2	5.36341	0	7.4913e-08	40.92	0.0022857	66.86	5.68734e-06	67.29	5.28185e-06
ENSMUSP00000114135	KHKKGQSEEIQKKR	K1(ICPL:13C(6)); K3(ICPL:13C(6)); K4(ICPL:13C(6)); K12(ICPL:13C(6)); K13(ICPL:13C(6))	2279.2	0.959472	2;-;2	7.00012	0	3.80323e-08	53.67	0.000122418	50.32	0.000267542	41.4	0.00210086
ENSMUSP00000114135	RKHKKGQSEEIQKKR	K2(ICPL); K4(ICPL); K5(ICPL); K13(ICPL); K14(ICPL)	2405.2	1.06653	2;1;1	2.54526	0	1.86128e-07	43.87	0.0012019	50.75	0.000225915	54.04	0.000112618
ENSMUSP00000114135	MKVELCSFSGYKIYPGHGR	N-Term(ICPL:13C(6)); K2(ICPL:13C(6)); C6(Carbamidomethyl); K12(ICPL:13C(6))	2562.22				0	7.77553e-09	44.6	0.000799228	39.21	0.00284881	17.12	0.462901
ENSMUSP00000114135	TDGKVFQFLNAKCESAFLSKR	K4(ICPL); K12(ICPL); C13(Carbamidomethyl); K20(ICPL)	2761.32	0.642723	1;-;-		0	1.488e-08	35.24	0.00789958
ENSMUSP00000114135	TDGKVFQFLNAKCESAFLSKR	K4(ICPL:13C(6)); K12(ICPL:13C(6)); C13(Carbamidomethyl); K20(ICPL:13C(6))	2779.38	1.11517	1;-;-		0.000182	0.00126805	19.28	0.371211
ENSMUSP00000114135	AITGASLADIMAKR	K13(ICPL)	1522.8	1.06956	-;1;1		0	1.10065e-09			101.06	2.17793e-09	27.82	0.0464201
ENSMUSP00000114135	AITGASLADIMAKR	M11(Oxidation); K13(ICPL)	1538.8	1.10216	-;-;1		0	8.49836e-07			33.06	0.01651	20.33	0.314659
ENSMUSP00000114135	AITGASLADIMAKR	M11(Oxidation); K13(ICPL:13C(6))	1544.82	1.11527	-;1;-		0	1.03029e-08			75.53	6.67557e-07	12.6	1.31065
ENSMUSP00000114135	RKHKKGQSEEIQKKR	K2(ICPL:13C(6)); K4(ICPL:13C(6)); K5(ICPL:13C(6)); K13(ICPL:13C(6)); K14(ICPL:13C(6))	2435.3	1.07879	-;1;-		0	4.91188e-10			57.82	3.83255e-05
ENSMUSP00000114107	QKEVNENFAIDLIAQQPVNEVEHR	K2(ICPL:13C(6))	2931.47	1.33708	1;-;-		0	1.89048e-05	24.83	0.14601			36.21	0.0107221
ENSMUSP00000114096	TLHSDNEGSVIDDSR		1644.75				0	5.51098e-06			37.03	0.00144651	12	0.444825
ENSMUSP00000114095	YREFPQLTR		1209.64				0.000319	0.00689531	24.26	0.0575584	20.91	0.121239	21.53	0.107922
ENSMUSP00000114013	IPELAINPLGDR		1307.73				0	2.90607e-06	28.59	0.0188165	44.86	0.000444159
ENSMUSP00000114002	LQGLVSFVVHSQDQIMTKR	K18(ICPL:13C(6))	2297.22	1.11772	1;-;-		0	2.15453e-06	29.68	0.0290107
ENSMUSP00000114000	DGLGGLPDIVR		1111.61				0.000128	0.000532633	29.57	0.0119793
ENSMUSP00000114000	YFDGSGGNNHAVEHYR		1822.79				0	3.96392e-09	61.5	2.90258e-06	39.07	0.000507907	64.44	1.60088e-06
ENSMUSP00000114000	SAAESISESVPVGPKVR	K15(ICPL:13C(6))	1823.96				5.9e-05	0.000453269	32.47	0.012344			20.12	0.21595
ENSMUSP00000114000	IGEWELIQESGVPLKPLFGPGYTGIR	K15(ICPL:13C(6))	2967.57	1.06103	1;1;-	4.56092	8.9e-05	0.000349891	13.26	1.40911	10.68	2.47114
ENSMUSP00000114000	VYLHLR		800.478				0.001641	0.0210535			21.55	0.0591366	22.54	0.0470822
ENSMUSP00000114000	DQALKALR	K5(ICPL:13C(6))	1025.58	0.740355	-;-;1		5.3e-05	0.00133103			31.83	0.00725041	30.88	0.00910489
ENSMUSP00000114000	QQDAQEFFLHLINMVER		2118.05				5.3e-05	0.000132948			28.13	0.0368388
ENSMUSP00000114000	MFKALIGKGHPEFSTNR	K3(ICPL:13C(6)); K8(ICPL:13C(6))	2155.09	0.817677	-;1;1		0	6.19466e-06			21.28	0.218579	23.35	0.137096
ENSMUSP00000113761	LAELQAKHGDPGDAAQQEAKQR	K7(ICPL); K20(ICPL)	2571.23	1.02928	1;1;-	6.62229	0	5.38328e-07	27.06	0.0470325	20.84	0.20521	29.96	0.0242221
ENSMUSP00000113761	LAELQAKHGDPGDAAQQEAKQR	K7(ICPL:13C(6)); K20(ICPL:13C(6))	2583.27	1.08137	1;1;1	7.74827	0	6.57827e-11	39.23	0.00371927	58.27	4.59468e-05	39.82	0.00316864
ENSMUSP00000113761	LSNLALVKPEKTKAVENYLIQMAR	K8(ICPL:13C(6)); K11(ICPL:13C(6)); K13(ICPL:13C(6))	3062.66	0.78105	-;1;-		0	2.04874e-06	21.5	0.117519	45.32	0.000486181
ENSMUSP00000113761	YGQLSGKVSEQGLIEILEKVSQQTEKKTTVKFNR	K7(ICPL:13C(6)); K19(ICPL:13C(6)); K26(ICPL:13C(6)); K27(ICPL:13C(6)); K31(ICPL:13C(6))	4421.28	0.9135	1;-;-		0	1.83773e-07	39.75	0.00444887
ENSMUSP00000113672	LSVGLEDEQDLLEDLDR		1958.96				0	8.75091e-10	89.37	2.57813e-08	37.97	0.00357477	85.15	7.11797e-08
ENSMUSP00000113672	VEKVVYPGLPSHPQHELAKR	K3(ICPL:13C(6)); K19(ICPL:13C(6))	2506.34	1.02246	2;4;1	25.3432	0	1.2861e-05	24.14	0.0834561	33.92	0.00855623	28.22	0.0308854
ENSMUSP00000113672	VEKVVYPGLPSHPQHELAKR	K3(ICPL); K19(ICPL)	2494.3	0.756093	-;-;2		5.3e-05	0.000141823			12.76	1.3427	24.26	0.097118
ENSMUSP00000113672	AVVLPISLATTFKQDFPGQSSGFEYSR	K13(ICPL:13C(6))	3056.54	1.22452	-;1;-		0	1.65265e-05			25.89	0.0957103
ENSMUSP00000113554	VAHLALKHR	K7(ICPL)	1149.66	0.913069	1;-;2	5.74611	0	0.000109211	27.88	0.013849	39.19	0.00103031	43.17	0.000412065
ENSMUSP00000113554	VAHLALKHR	K7(ICPL:13C(6))	1155.68	1.08499	3;4;2	14.0243	0	2.20537e-05	34.65	0.00205661	44.95	0.000191934	42.44	0.000342099
ENSMUSP00000113554	AAAASAAEAGIATPGTEGER		1800.88				0	6.92931e-08	53.02	0.000102271			52.19	0.00012079
ENSMUSP00000113554	RAAAASAAEAGIATPGTEGER		1956.97				0.001896	0.0295153	10.12	2.68965			12.69	1.48293
ENSMUSP00000113554	LQAQQDAVNIVCHSKTR	C12(Carbamidomethyl); K15(ICPL:13C(6))	2079.05	1.15513	2;3;1	5.78456	0	2.94303e-08	36.02	0.00605084	39.04	0.00304362	13.02	1.2073
ENSMUSP00000113554	ILSKLHTVQPKGKITFCTGIR	K4(ICPL:13C(6)); K11(ICPL:13C(6)); K13(ICPL:13C(6)); C17(Carbamidomethyl)	2730.5	1.04809	1;1;1	11.7904	0	7.0183e-07	46.08	0.000378537	16.44	0.363178	46.6	0.000334728
ENSMUSP00000113553	IAEAEIENLSGAR		1372.71				0	5.13428e-05			20.79	0.150896
ENSMUSP00000113502	IMVANIEEVLQR		1414.77				0	6.08371e-06	38.75	0.00170024
ENSMUSP00000113502	NLGSINTELQDVQR		1586.81				0	1.28158e-09	68.97	2.36417e-06	15.99	0.456958	49.21	0.000225506
ENSMUSP00000113502	VADGLPLAASMQEDEQSGR		1973.92				0	1.94663e-11	69.32	1.92383e-06	63.41	7.4106e-06
ENSMUSP00000113391	NFLGEKYIR	K6(ICPL:13C(6))	1250.66	1.16378	1;-;-		0.000182	0.00122658	20.3	0.142788
ENSMUSP00000113391	MKTILSNQTVDIPENVEITLKGR	N-Term(ICPL); K2(ICPL); K21(ICPL)	2914.48				0	1.05522e-06	22.09	0.199928			20.45	0.29842
ENSMUSP00000113391	MKTILSNQTVDIPENVEITLKGR	N-Term(ICPL:13C(6)); K2(ICPL:13C(6)); K21(ICPL:13C(6))	2932.54				0	2.90102e-05	18.84	0.416015	27.89	0.0545372
ENSMUSP00000113391	TVIVKGPR	K5(ICPL:13C(6))	980.597	1.03582	-;1;-		0.000647	0.015749			20.32	0.0320493
ENSMUSP00000113371	SVEGLQEGSVLR		1273.67				0	1.11067e-05	38.12	0.00279048			25.02	0.0569742
ENSMUSP00000113371	LGYEEHIPGQTR		1399.7				0	0.000120115	19.73	0.173987			33.8	0.00689919
ENSMUSP00000113371	ERPLCPLQPQNR	C5(Carbamidomethyl)	1507.78				0.000429	0.00451703	14.56	0.698141			26.24	0.0456353
ENSMUSP00000113371	VVEEPYTVR		1091.57				0.006916	0.136806			18.2	0.192979
ENSMUSP00000113371	TSRPLKILR	K6(ICPL:13C(6))	1194.74	0.969577	-;1;2		0.000216	0.00134556			28.24	0.00292439	24.57	0.00663367
ENSMUSP00000113371	IATPFQVYSWTAPQAEHAMDCVR	C21(Carbamidomethyl)	2678.25				0.000195	0.00248668			12.84	1.01399	11.53	1.34287
ENSMUSP00000113371	YLELLER		935.519				0.000395	0.00284249					30.89	0.0065991
ENSMUSP00000113332	IRPTVQEDGGDVIYR		1717.89				0	1.55093e-06	46.1	0.000596494	50.62	0.000222376	50.84	0.000210155
ENSMUSP00000113117	TNLPIFKLKESCVR	K7(ICPL); K9(ICPL); C12(Carbamidomethyl)	1914.99	0.858922	1;-;-		0	3.40105e-06	36.21	0.00570806
ENSMUSP00000113117	TNLPIFKLKESCVR	K7(ICPL:13C(6)); K9(ICPL:13C(6)); C12(Carbamidomethyl)	1927.03	1.03229	-;1;-		5.3e-05	0.00040017			23.31	0.082832
ENSMUSP00000113117	RQGLEQFINKIAGHPLAQNER	K10(ICPL:13C(6))	2530.34	0.955319	-;1;-		0.000323	0.00683733			21.19	0.18666
ENSMUSP00000113071;ENSMUSP00000000590	ILALCMGNHELYMR	C5(Carbamidomethyl)	1720.83				0	1.16377e-05			34.21	0.00603111	57.59	2.42982e-05
ENSMUSP00000113071	IQVWHEEHR		1233.61				0	3.27794e-06	43.47	0.000679168	56.98	3.02675e-05	41.88	0.000979438
ENSMUSP00000113071	KESPLLFKFR	K1(ICPL:13C(6)); K8(ICPL:13C(6))	1486.82	0.989913	1;1;-	8.41646	0	1.18138e-05	19.14	0.193819	46.57	0.000352468
ENSMUSP00000113071	AQSEAEKLAKER	K7(ICPL:13C(6)); K10(ICPL:13C(6))	1581.81	1.24552	-;-;2		0	2.0633e-05	39.95	0.00167922			70.15	1.70991e-06
ENSMUSP00000113071	ELAEKEKEKIER	K5(ICPL:13C(6)); K7(ICPL:13C(6)); K9(ICPL:13C(6))	1834.95	0.850324	1;-;-		0	3.50792e-05	16.87	0.533504
ENSMUSP00000113071	VLEQHKLNKDQWEER	K6(ICPL); K9(ICPL)	2162.05	1.11816	-;1;1		0	3.19806e-05	18.28	0.289757	25.53	0.0554198	27.37	0.0369211
ENSMUSP00000113071	VLEQHKLNKDQWEER	K6(ICPL:13C(6)); K9(ICPL:13C(6))	2174.08	1.00679	1;-;-		0	3.26117e-07	38.14	0.00392095
ENSMUSP00000113071	EKEELMEKLKQIEEQTKKAQQELEEQTRR	K2(ICPL:13C(6)); K8(ICPL:13C(6)); K10(ICPL:13C(6)); K17(ICPL:13C(6)); K18(ICPL:13C(6))	4185.11				0.000319	0.00762352	11.97	3.26878	23.89	0.227842
ENSMUSP00000113071	KKKESEAVEWQQKAQMVQEDLEKTR	K1(ICPL); K2(ICPL); K3(ICPL); K13(ICPL); K23(ICPL)	3571.67				5.3e-05	0.000331832			12.9	1.48473
ENSMUSP00000113071	ALLENEKKKR	K7(ICPL); K8(ICPL); K9(ICPL)	1543.8				0.000429	0.00373494					16.52	0.503626
ENSMUSP00000113071	ALLENEKKKR	K7(ICPL:13C(6)); K8(ICPL:13C(6)); K9(ICPL:13C(6))	1561.86				0.000353	0.00242647					24.56	0.0491673
ENSMUSP00000113026	ARDFDLDLAWR		1377.69				5.3e-05	0.000414615	24.4	0.0519202	17.67	0.259067	17.36	0.28099
ENSMUSP00000113026	AECPELSADLRPR	C3(Carbamidomethyl)	1513.74				0.000182	0.00115177	22.8	0.0705866	29.71	0.0140046	25.26	0.0393164
ENSMUSP00000113026	GIHLINEPVIFHAVFSMIKPFLTEKIKDR	K19(ICPL:13C(6)); K25(ICPL:13C(6)); K27(ICPL:13C(6))	3726.02	1.27017	2;-;1	16.1625	0	2.49118e-07	40.8	0.00160115	12.71	1.02337	26.38	0.0472946
ENSMUSP00000113026	LMKNYYKWR	K3(ICPL:13C(6)); K7(ICPL:13C(6))	1523.77	1.31522	-;-;1		0.000429	0.00418149					13.13	0.904717
ENSMUSP00000112861;ENSMUSP00000078715;ENSMUSP00000128803	VFDKEGNGTVMGAELR	K4(ICPL)	1827.87				0	1.55266e-10	86.13	3.54701e-08	70.35	1.3285e-06	96.96	2.90983e-09
ENSMUSP00000112861;ENSMUSP00000078715;ENSMUSP00000128803	VFDKEGNGTVMGAELR	K4(ICPL:13C(6))	1833.89				0	1.57455e-11	71.64	1.18932e-06	84.4	5.80925e-08	75.35	5.09091e-07
ENSMUSP00000112861;ENSMUSP00000078715;ENSMUSP00000128803	VFDKEGNGTVMGAELR	K4(ICPL); M11(Oxidation)	1843.86				0	5.1355e-07	42.33	0.000959056			53.56	6.76252e-05
ENSMUSP00000112861	TGECKITLSQVGDVLR	C4(Carbamidomethyl); K5(ICPL)	1880.95				0	1.09727e-10	82.73	1.36267e-07	87.69	4.15327e-08	103.68	1.08209e-09
ENSMUSP00000112861	MSFSADQIADFKEAFLLFDR	M1(Oxidation)	2367.13				0.000597	0.00670408	12.47	1.15513	16.93	0.394384	29.44	0.023037
ENSMUSP00000112798	LPLAAQAHPFRPPVR		1669.96				0.000116	0.000721524					22.92	0.030375
ENSMUSP00000112747	EFFVGLSKR	K8(ICPL:13C(6))	1193.64	0.914887	1;1;-	1.24022	0.000182	0.00390462	29.88	0.01321	33.65	0.00560975
ENSMUSP00000112747	YDKLTVPDDMAANCIYLNIPSKGHVLLHR	K3(ICPL:13C(6)); C14(Carbamidomethyl); K22(ICPL:13C(6))	3575.79	1.17832	1;-;-		0	3.45404e-06	25.08	0.140171
ENSMUSP00000112615	HLKQTYIR	K3(ICPL)	1163.63				0.000128	0.000783615	31.5	0.00750423			25.07	0.0315839
ENSMUSP00000112615	MFSNQGVCTLEIR	C8(Carbamidomethyl)	1554.74				8.9e-05	0.000215472	16.55	0.281063
ENSMUSP00000112615	LEIPVTGEPPPKAIWSR	K12(ICPL)	1995.07	0.0382517	1;-;-		8.9e-05	0.000378974	13.13	1.10171
ENSMUSP00000112606	NLGIQSQFTR		1163.62				8.9e-05	0.000223914	28.07	0.0223796
ENSMUSP00000112606	VLLMELEEAR		1202.65				0	1.71586e-06	67.83	2.35687e-06
ENSMUSP00000112606	LKTSTSNVEQYR	K2(ICPL:13C(6))	1536.77				0	2.97395e-05	31.4	0.0132572
ENSMUSP00000112606	SQNTKISTQLDFASKR	K5(ICPL:13C(6)); K15(ICPL:13C(6))	2046.05	0.900636	1;-;-		0	2.22263e-05	16.97	0.484191
ENSMUSP00000112606	GNHVIRDEEVSSADISSSSEVISQHLVSYR		3300.62				0	4.97266e-07	35.27	0.010802
ENSMUSP00000112606	INKYLDEIVKEVEAKAPILKR	K3(ICPL); K10(ICPL); K15(ICPL); K20(ICPL)	2889.53				5.3e-05	0.000221244			15.41	0.78553
ENSMUSP00000112606	INKYLDEIVKEVEAKAPILKR	K3(ICPL:13C(6)); K10(ICPL:13C(6)); K15(ICPL:13C(6)); K20(ICPL:13C(6))	2913.61	1.21355	-;1;-		0	1.28284e-07			41.26	0.000808023
ENSMUSP00000112606	EKGNEILELKCNLENKKEEVLR	K2(ICPL:13C(6)); K10(ICPL:13C(6)); C11(Carbamidomethyl); K16(ICPL:13C(6)); K17(ICPL:13C(6))	3129.59	1.37444	-;1;-		0	4.45659e-07			40.88	0.00276005
ENSMUSP00000112424	VHIDIGADGR		1052.55				0	8.22055e-05	24.77	0.0366769	27.11	0.021399	34.77	0.00333426
ENSMUSP00000112424	GMGGHGYGGAGDASSGFHGGHFVHMR		2543.08				0	3.32259e-07	24.86	0.00865458			50.78	2.25613e-05
ENSMUSP00000112368	RVEIMEEESEQ		1378.61				0	5.04138e-06	26.81	0.0107351	16.54	0.117564	62.37	3.042e-06
ENSMUSP00000112368	SSSSGHYVSWVR		1351.64				0	8.61484e-06			42.72	0.00064415	33.17	0.00583157
ENSMUSP00000112308	GGGGNFGPGPGSNFR		1377.63				0	6.18605e-06	42.52	0.000291074	63.41	2.37139e-06	52.22	3.11891e-05
ENSMUSP00000112308	KLFIGGLSFETTEESLR	K1(ICPL)	2032.04	0.824821	2;-;1	16.1101	0	5.10854e-13	88.05	3.72887e-08			76.65	5.26622e-07
ENSMUSP00000112308	KLFIGGLSFETTEESLR	K1(ICPL:13C(6))	2038.06	2.91392	1;3;2	79.5361	0	5.85826e-14	104.03	9.66671e-10	75.3	7.09766e-07	101.4	1.83645e-09
ENSMUSP00000112308	NYYEQWGKLTDCVVMR	K8(ICPL:13C(6)); C12(Carbamidomethyl)	2172.99	1.53938	1;-;-		0.000182	0.000878678	10.29	1.01024
ENSMUSP00000112308	NMGGPYGGGNYGPGGSGGSGGYGGR		2189.9				0	4.89324e-17	127.28	3.27369e-13	143.87	4.92245e-15	137.38	2.37653e-14
ENSMUSP00000112308	NMGGPYGGGNYGPGGSGGSGGYGGR	M2(Oxidation)	2205.9				0	7.18207e-15	137.11	1.94075e-14	126.75	2.10848e-13	111.5	7.06269e-12
ENSMUSP00000112308	GFGDGYNGYGGGPGGGNFGGSPGYGGGR		2495.04				0	6.32605e-11	108.76	2.72743e-11
ENSMUSP00000112308	GFGFVTFSSMAEVDAAMAARPHSIDGR		2827.33				0	6.98435e-06	42.49	0.00121464	30.25	0.0207221	32.99	0.0109511
ENSMUSP00000112308	GFGFVTFSSMAEVDAAMAARPHSIDGR	M17(Oxidation)	2843.32				0	2.62754e-06	23.54	0.0759039			12.51	0.965003
ENSMUSP00000112308	NYYEQWGKLTDCVVMRDPASKR	K8(ICPL); C12(Carbamidomethyl); K21(ICPL)	2926.34	1.04788	1;-;1	52.5353	0	0.000118225	38.33	0.00274689	25.1	0.0431096	40.04	0.00148625
ENSMUSP00000112308	NYYEQWGKLTDCVVMRDPASKR	K8(ICPL:13C(6)); C12(Carbamidomethyl); K21(ICPL:13C(6))	2938.38	0.914102	3;1;2	21.3358	0	1.43088e-07	45.69	0.000628573	52.27	0.000135483	50.67	0.000181692
ENSMUSP00000112308	NYYEQWGKLTDCVVMRDPASKR	K8(ICPL:13C(6)); C12(Carbamidomethyl); M15(Oxidation); K21(ICPL:13C(6))	2954.38				0.000319	0.00765577	15.72	0.5787
ENSMUSP00000112308	EESGKPGAHVTVKKLFVGGIKEDTEEHHLR	K5(ICPL); K13(ICPL); K14(ICPL); K21(ICPL)	3747.82	0.704322	4;1;2	13.5792	0	1.47426e-06	33.32	0.0245364	47.12	0.00094133	25.74	0.132276
ENSMUSP00000112308	EESGKPGAHVTVKKLFVGGIKEDTEEHHLR	K5(ICPL:13C(6)); K13(ICPL:13C(6)); K14(ICPL:13C(6)); K21(ICPL:13C(6))	3771.89	1.05143	2;1;-	16.9898	0	0.000102402	16.38	1.1162	17.92	0.751484	21.52	0.349528
ENSMUSP00000112308	GFGFVTFDDHDPVDKIVLQKYHTINGHNAEVR	K15(ICPL); K20(ICPL)	3878.87				0	4.39719e-07	29.14	0.0525994			19.39	0.52419
ENSMUSP00000112308	GFGFVTFDDHDPVDKIVLQKYHTINGHNAEVR	K15(ICPL:13C(6)); K20(ICPL:13C(6))	3890.92	1.00759	2;-;3	35.7537	0	3.56566e-07	22.1	0.291341	31.94	0.0330423	49.67	0.000551881
ENSMUSP00000112308	GGNFGFGDSR		1013.44				5.3e-05	0.000162252			28.47	0.00533373
ENSMUSP00000112259	KSSTPEEVKKR	K1(ICPL); K9(ICPL); K10(ICPL)	1603.79	0.995919	-;1;1		0	7.68801e-07			75.47	5.26434e-07	49.78	0.000198821
ENSMUSP00000112259	KSSTPEEVKKR	K1(ICPL:13C(6)); K9(ICPL:13C(6)); K10(ICPL:13C(6))	1621.85	0.980249	-;2;1		0	4.05144e-07			66.8	4.28306e-06	52.09	0.000126075
ENSMUSP00000112121	VGHIAHLNLR		1129.66				0	0.000332472	12.76	0.545553			21.75	0.0688394
ENSMUSP00000112105	NTDEMVELR		1106.51				0	2.13575e-05	27.33	0.0149791	52.43	5.02901e-05	12.43	0.474327
ENSMUSP00000112105	GGDLMAYDRR		1153.54				0.002345	0.0446291	17.03	0.176356	27.74	0.0149758	25.94	0.0267417
ENSMUSP00000112105	VVLIGGKPDR	K7(ICPL)	1158.66	0.736045	2;-;-		0	0.000231752	24.7	0.0372729	39.65	0.00119232	47.13	0.000213006
ENSMUSP00000112105	VVLIGGKPDR	K7(ICPL:13C(6))	1164.68	0.780068	-;4;5		0	8.55327e-06	43.86	0.000205575	52.77	2.64223e-05	47.58	8.72911e-05
ENSMUSP00000112105	NLPLPPPPPPR		1194.7				0	0.000351369	29.8	0.00607335	44.6	0.000154298	42.01	0.000365114
ENSMUSP00000112105	SRNTDEMVELR		1349.65				0	0.000173104	39.09	0.00175101	45.94	0.000362923	41.66	0.000962098
ENSMUSP00000112105	TDYNASVSVPDSSGPER		1780.8				0	3.05485e-07	62.8	3.59493e-06	59.52	7.92973e-06	57.05	1.3807e-05
[truncated: 10,447 more rows]

## Sheet: S3_c
		All peptides identified and quantified after high confidence peptide filtering (1 Day, 0.5 Gy)
[truncated: 10,690 more rows]

[truncated: 1 more sheets: S3_d]
